# Supplementary material
Source: PubMed Central journal article supplement (PMC6467289)
Supplement: NIHMS1022332-supplement-Supplementary_Material.pdf [file NIHMS1022332-supplement-Supplementary_Material.pdf]

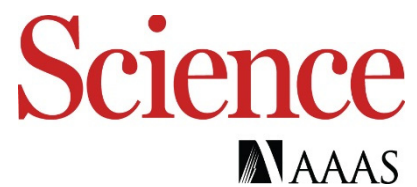

## Supplementary Materials for

Catalytic reductive [4 + 1]-cycloadditions of vinylidenes and dienes

You-Yun Zhou, Christopher Uyeda\*

Correspondence to: \*cuyeda@purdue.edu

**This PDF file includes:**

Materials and Methods  
Figs. S1 to S13  
Tables S1 to S7  
NMR Spectra  
References

## Materials and Methods

|                                                                                     |     |
|-------------------------------------------------------------------------------------|-----|
| 1. General Information                                                              | 3   |
| 2. Reaction Optimization Studies                                                    | 5   |
| 3. Synthesis and Characterization of NDI Ligands and [NDI]Ni <sub>2</sub> Complexes | 8   |
| 4. Synthesis and Characterization of 1,1-Dichloroalkenes                            | 12  |
| 5. Synthesis and Characterization of 1,3-Dienes                                     | 19  |
| 6. Intermolecular [4 + 1]-Cycloadditions                                            | 22  |
| 7. Synthetic Applications of the [4 + 1]-Cycloadditions Products                    | 41  |
| 8. Intramolecular [4 + 1]-Cycloadditions                                            | 45  |
| 9. Catalytic Asymmetric [4 + 1]-Cycloadditions                                      | 48  |
| 10. Mechanistic Studies                                                             | 54  |
| 11. X-Ray Diffraction Data                                                          | 59  |
| 12. NMR Spectra                                                                     | 65  |
| 13. DFT Calculations                                                                | 156 |
| 14. References                                                                      | 185 |

## 1. General Information

**General considerations.** All manipulations were carried out using standard Schlenk or glovebox techniques under an atmosphere of N<sub>2</sub>. Solvents were dried and degassed by passing through a column of activated alumina and sparging with Ar gas. Deuterated solvents were purchased from Cambridge Isotope Laboratories, Inc., degassed, and stored over activated 3 Å molecular sieves prior to use. All other reagents and starting materials were purchased from commercial vendors and used without further purification unless otherwise noted. Liquid reagents were degassed and stored over activated 3 Å molecular sieves prior to use. The [<sup>i</sup>-<sup>Pr</sup>NDI]Ni<sub>2</sub>(C<sub>6</sub>H<sub>6</sub>) complex **3** was prepared according to previously reported procedures (28). Zn powder (325 mesh, 99.9%) was purchased from Strem and used without further purification.

**Physical methods.** <sup>1</sup>H, <sup>19</sup>F and <sup>13</sup>C{<sup>1</sup>H} NMR spectra were collected at room temperature on a Varian INOVA 300 MHz, Bruker AV400 HD or AV800 HD spectrometer. <sup>1</sup>H and <sup>13</sup>C{<sup>1</sup>H} NMR spectra are reported in parts per million relative to tetramethylsilane, using the residual solvent resonances as an internal standard. UV–vis measurements were acquired on an Agilent Cary 6000i UV-Vis-NIR Spectrophotometer using a 1-cm two-window quartz cuvette. ATR-IR data were collected on a Thermo Scientific Nicolet Nexus spectrometer containing a MCT\* detector and KBr beam splitter with a range of 350–7400 cm<sup>-1</sup>. Elemental analyses were performed by Midwest Microlab (Indianapolis, IN). High-resolution mass data were obtained using a Thermo Scientific LTQ Orbitrap XL mass spectrometer or a Thermo Electron Corporation MAT 95XP-Trap mass spectrometer. HPLC was performed on a Varian ProStar Series instrument equipped with a variable wavelength detector using chiral columns (Chiralpak OD-H, AD-H, 0.46 cm x 25 cm) purchased from Daicel.

**X-ray crystallography.** Single-crystal X-ray diffraction studies were carried out at the Purdue X-Ray Crystallography Facility using a Rigaku Rapid II diffractometer or a Bruker AXS D8 Quest CMOS diffractometer.

Procedure for XRD data collected using the Rigaku Rapid II instrument. Single crystal X-ray measurement was conducted on a Rigaku Rapid II curved image plate diffractometer with a Cu-Kα X-ray microsource ( $\lambda = 1.54178 \text{ \AA}$ ) with a laterally graded multilayer (Goebel) mirror for monochromatization. Single crystals were mounted on Mitegen microloop mounts using a trace of mineral oil and cooled in-situ to 100(2) K for data collection. Data were collected using the dtrek option of CrystalClear-SM Expert 2.1 b32 (29). Data were processed using HKL3000 and data were corrected for absorption and scaled using Scalepack (30).

Procedure for XRD data collected using the Bruker Quest instrument. Single crystals were coated with fomblin and quickly transferred to the goniometer head of a Bruker Quest diffractometer with a fixed chi angle, a sealed tube fine focus X-ray tube, single crystal curved graphite incident beam monochromator, a Photon100 CMOS area detector and an Oxford Cryosystems low temperature device. Examination and data collection were performed with Mo Kα radiation ( $\lambda = 0.71073 \text{ \AA}$ ) at 150 K. Data were collected, reflections were indexed and processed, and the files scaled and corrected for absorption using APEX3 (31).

Structure Solution and Refinement. The space groups were assigned and the structures were solved by direct methods using XPREP within the SHELXTL suite of programs (32, 33) and refined by full matrix least squares against F<sup>2</sup> with all reflections using Shelxl2019 (34, 35) using the graphical interface Shelxl (36). If not specified otherwise H atoms attached to carbon

and nitrogen atoms were positioned geometrically and constrained to ride on their parent atoms, with carbon hydrogen bond distances of 0.95 Å for aromatic C-H and 1.00, 0.99, and 0.98 Å for aliphatic CH, CH<sub>2</sub> and CH<sub>3</sub> moieties, respectively. Methyl H atoms were allowed to rotate but not to tip to best fit the experimental electron density. Uiso(H) values were set to a multiple of Ueq(C) with 1.5 for CH<sub>3</sub>, and 1.2 for CH units, respectively. Additional data collection and refinement details, including description of disorder and/or twinning (where present) can be found in Section 11.

## 2. Reaction Optimization Studies

**General Procedure.** In an N<sub>2</sub>-filled glovebox, a 2-dram vial equipped with a magnetic stir bar was charged with ligand (5 mol%), Ni(DME)Br<sub>2</sub> (10 mol%), Zn powder (0.60 mmol, 3.0 equiv) and NMP (0.40 mL). The mixture was stirred at 22 °C for 15 min. To the mixture were sequentially added 2,3-dimethylbutadiene (45 μL, 0.40 mmol, 2.0 equiv) and 1-(2,2-dichlorovinyl)-4-methoxybenzene (41 mg, 0.20 mmol, 1.0 equiv) by syringe. The vial was sealed, and the reaction mixture was stirred at 22 °C. After 24 h, mesitylene (17 mg, 20 μL) was added. An aliquot of the reaction mixture was removed and loaded directly onto a 2-cm pad of SiO<sub>2</sub> packed in a pipet. The mixture was eluted from the SiO<sub>2</sub> pad with CDCl<sub>3</sub> (approx. 1.5 mL). The conversion of **1** and yield of **2** were determined by <sup>1</sup>H NMR integration against mesitylene.

**Table S1. Catalyst comparison studies.**

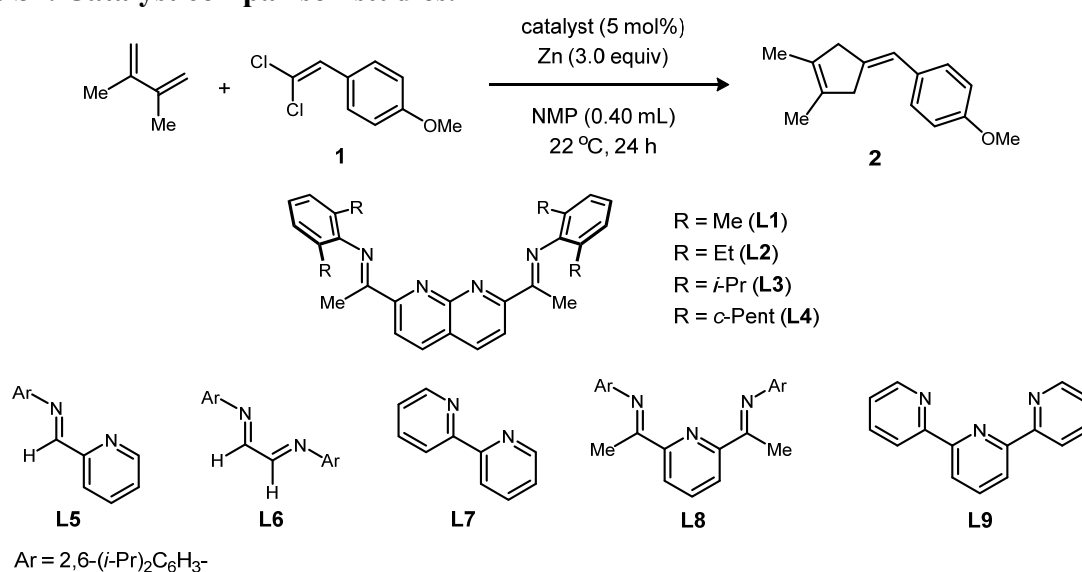

| entry          | ligand                                             | conversion (%) <sup>*</sup> | yield (%) <sup>*</sup> |
|----------------|----------------------------------------------------|-----------------------------|------------------------|
| 1 <sup>‡</sup> | <b>L1</b> + Ni(DME)Br <sub>2</sub>                 | 33                          | 12                     |
| 2 <sup>‡</sup> | <b>L2</b> + Ni(DME)Br <sub>2</sub>                 | 46                          | 22                     |
| 3 <sup>‡</sup> | <b>L3</b> + Ni(DME)Br <sub>2</sub>                 | 63                          | 52                     |
| 4 <sup>‡</sup> | <b>L4</b> + Ni(DME)Br <sub>2</sub>                 | >99                         | >99 (99) <sup>†</sup>  |
| 5 <sup>§</sup> | <b>L5</b> + Ni(DME)Br <sub>2</sub>                 | 40                          | <2                     |
| 6 <sup>§</sup> | <b>L6</b> + Ni(DME)Br <sub>2</sub>                 | 43                          | <2                     |
| 7 <sup>§</sup> | <b>L7</b> + Ni(DME)Br <sub>2</sub>                 | 29                          | <2                     |
| 8 <sup>§</sup> | <b>L8</b> + Ni(DME)Br <sub>2</sub>                 | 29                          | <2                     |
| 9 <sup>§</sup> | <b>L9</b> + Ni(DME)Br <sub>2</sub>                 | 41                          | <2                     |
| 10             | (dppe)NiCl <sub>2</sub>                            | 6                           | <2                     |
| 11             | (Ph <sub>3</sub> P) <sub>2</sub> NiCl <sub>2</sub> | 2                           | <2                     |
| 12             | Ni(DME)Br <sub>2</sub>                             | 57                          | <2                     |
| 13             | --                                                 | <2                          | <2                     |

<sup>\*</sup>Conversions of **1** and yields of **2** were determined by <sup>1</sup>H NMR integration against an internal standard. <sup>†</sup>Isolated yield. <sup>‡</sup>Ligand (5 mol%) and Ni(DME)Br<sub>2</sub> (10 mol%). <sup>§</sup>Ligand (5 mol%) and Ni(DME)Br<sub>2</sub> (5 mol%).

**Table S2. Screen of reaction conditions.** Reaction conditions: 1-(2,2-dichlorovinyl)-4-methoxybenzene (0.20 mmol), 2,3-dimethyl-butadiene (0.40 mmol), catalyst (5 mol%), Zn (0.60 mmol, 3.0 equiv), 24 h, 22 °C.

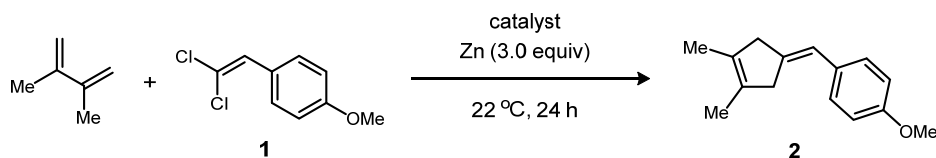

| entry             | catalyst                                                                                  | solvent (mL)                                      | conversion (%) <sup>*</sup> | yield (%) <sup>*</sup> |
|-------------------|-------------------------------------------------------------------------------------------|---------------------------------------------------|-----------------------------|------------------------|
| 1                 | [ <i>i</i> -Pr <sub>2</sub> NDI]Ni <sub>2</sub> (C <sub>6</sub> H <sub>6</sub> ) <b>3</b> | Et <sub>2</sub> O/DMA (1.6/0.2)                   | 31                          | 16                     |
| 2                 | [ <i>i</i> -Pr <sub>2</sub> NDI]Ni <sub>2</sub> (C <sub>6</sub> H <sub>6</sub> ) <b>3</b> | Et <sub>2</sub> O/NMP (0.4/0.05)                  | 33                          | 14                     |
| 3                 | [ <i>i</i> -Pr <sub>2</sub> NDI]Ni <sub>2</sub> (C <sub>6</sub> H <sub>6</sub> ) <b>3</b> | Et <sub>2</sub> O/NMP (0.8/0.1)                   | 28                          | 17                     |
| 4                 | [ <i>i</i> -Pr <sub>2</sub> NDI]Ni <sub>2</sub> (C <sub>6</sub> H <sub>6</sub> ) <b>3</b> | Et <sub>2</sub> O/NMP (1.6/0.2)                   | 34                          | 26                     |
| 5                 | [ <i>i</i> -Pr <sub>2</sub> NDI]Ni <sub>2</sub> (C <sub>6</sub> H <sub>6</sub> ) <b>3</b> | Et <sub>2</sub> O/NMP (3.2/0.4)                   | 59                          | 29                     |
| 6 <sup>†</sup>    | [ <i>i</i> -Pr <sub>2</sub> NDI]Ni <sub>2</sub> (C <sub>6</sub> H <sub>6</sub> ) <b>3</b> | Et <sub>2</sub> O/NMP (1.6/0.2)                   | 65                          | 28                     |
| 7                 | [ <i>i</i> -Pr <sub>2</sub> NDI]Ni <sub>2</sub> (C <sub>6</sub> H <sub>6</sub> ) <b>3</b> | DCE/NMP (1.6/0.2)                                 | 23                          | 6                      |
| 8                 | [ <i>i</i> -Pr <sub>2</sub> NDI]Ni <sub>2</sub> (C <sub>6</sub> H <sub>6</sub> ) <b>3</b> | EtOAc/NMP (1.6/0.2)                               | 49                          | 24                     |
| 9                 | [ <i>i</i> -Pr <sub>2</sub> NDI]Ni <sub>2</sub> (C <sub>6</sub> H <sub>6</sub> ) <b>3</b> | (EtO) <sub>2</sub> CO/NMP (1.6/0.2)               | 39                          | 12                     |
| 10                | [ <i>i</i> -Pr <sub>2</sub> NDI]Ni <sub>2</sub> (C <sub>6</sub> H <sub>6</sub> ) <b>3</b> | Et <sub>2</sub> O/EtOAc (1.6/0.2)                 | 30                          | <2                     |
| 11                | [ <i>i</i> -Pr <sub>2</sub> NDI]Ni <sub>2</sub> (C <sub>6</sub> H <sub>6</sub> ) <b>3</b> | Et <sub>2</sub> O/(EtO) <sub>2</sub> CO (1.6/0.2) | 30                          | <2                     |
| 12                | [ <i>i</i> -Pr <sub>2</sub> NDI]Ni <sub>2</sub> (C <sub>6</sub> H <sub>6</sub> ) <b>3</b> | Et <sub>2</sub> O/DMSO (1.6/0.2)                  | 35                          | 22                     |
| 13                | [ <i>i</i> -Pr <sub>2</sub> NDI]Ni <sub>2</sub> (C <sub>6</sub> H <sub>6</sub> ) <b>3</b> | THF (1.8)                                         | 21                          | 11                     |
| 14                | [ <i>i</i> -Pr <sub>2</sub> NDI]Ni <sub>2</sub> (C <sub>6</sub> H <sub>6</sub> ) <b>3</b> | DME (1.8)                                         | 23                          | <2                     |
| 15                | [ <i>i</i> -Pr <sub>2</sub> NDI]Ni <sub>2</sub> (C <sub>6</sub> H <sub>6</sub> ) <b>3</b> | Dioxane (1.8)                                     | 28                          | <2                     |
| 16                | [ <i>i</i> -Pr <sub>2</sub> NDI]Ni <sub>2</sub> (C <sub>6</sub> H <sub>6</sub> ) <b>3</b> | EtOAc (1.8)                                       | 20                          | <2                     |
| 17                | [ <i>i</i> -Pr <sub>2</sub> NDI]Ni <sub>2</sub> (C <sub>6</sub> H <sub>6</sub> ) <b>3</b> | CH <sub>3</sub> CN (1.8)                          | >95                         | <2                     |
| 18                | [ <i>i</i> -Pr <sub>2</sub> NDI]Ni <sub>2</sub> (C <sub>6</sub> H <sub>6</sub> ) <b>3</b> | DMA (1.8)                                         | 42                          | 21                     |
| 19                | [ <i>i</i> -Pr <sub>2</sub> NDI]Ni <sub>2</sub> (C <sub>6</sub> H <sub>6</sub> ) <b>3</b> | NMP (1.8)                                         | 49                          | 34                     |
| 20 <sup>‡</sup>   | [ <i>i</i> -Pr <sub>2</sub> NDI]Ni <sub>2</sub> (C <sub>6</sub> H <sub>6</sub> ) <b>3</b> | NMP (1.8)                                         | 73                          | 43                     |
| 21 <sup>‡,§</sup> | [ <i>i</i> -Pr <sub>2</sub> NDI]Ni <sub>2</sub> (C <sub>6</sub> H <sub>6</sub> ) <b>3</b> | NMP (1.8)                                         | 94                          | 79 (73 <sup>¶</sup> )  |
| 22 <sup>‡,§</sup> | [ <i>i</i> -Pr <sub>2</sub> NDI]Ni <sub>2</sub> (C <sub>6</sub> H <sub>6</sub> ) <b>3</b> | NMP (0.4)                                         | 91                          | 76 (73 <sup>¶</sup> )  |
| 23 <sup>#</sup>   | <b>L3</b> + Ni(DME)Br <sub>2</sub>                                                        | NMP (1.8)                                         | 66                          | 32                     |
| 24 <sup>#</sup>   | <b>L3</b> + FeBr <sub>2</sub>                                                             | NMP (1.8)                                         | <5                          | <2                     |
| 25 <sup>#</sup>   | <b>L3</b> + Co(DME)Br <sub>2</sub>                                                        | NMP (1.8)                                         | 18                          | <2                     |
| 26 <sup>#</sup>   | <b>L3</b> + Ni(DME)Br <sub>2</sub>                                                        | NMP (0.4)                                         | 63                          | 52                     |
| 27 <sup>#</sup>   | <b>L4</b> + Ni(DME)Br <sub>2</sub>                                                        | NMP (0.4)                                         | 99                          | >99 (99 <sup>¶</sup> ) |

\*Conversions and yields were determined by <sup>1</sup>H NMR integration against mesitylene.

<sup>†</sup>Temperature: 50 °C. <sup>‡</sup>10 mol% catalyst. <sup>§</sup>2,3-dimethylbutadiene (0.80 mmol). <sup>¶</sup>Isolated yield.

<sup>#</sup>Ligand (5 mol%) and metal salt (10 mol%).

**Table S3. Screen of reducing agents.** Reaction conditions: 1-(2,2-dichlorovinyl)-4-methoxybenzene (0.20 mmol), 2,3-dimethyl-butadiene (0.40 mmol), **L4** (5 mol%), Ni(DME)Br<sub>2</sub> (10 mol%), reducing agent (x equiv), NMP (0.40 mL), 24 h, 22 °C.

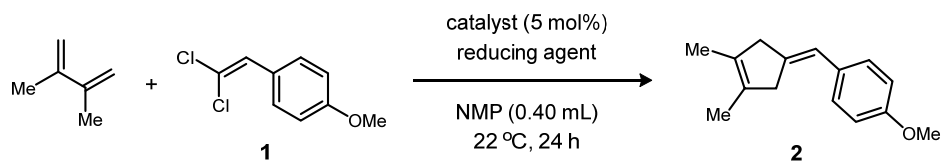

| entry          | reducing agent | conversion (%) <sup>*</sup> | yield (%) <sup>*</sup> |
|----------------|----------------|-----------------------------|------------------------|
| 1              | Zn (1.5 equiv) | >99                         | 96                     |
| 2              | Zn (3.0 equiv) | >99                         | >99                    |
| 3 <sup>†</sup> | Zn (3.0 equiv) | 96                          | 96                     |
| 4 <sup>‡</sup> | Zn (3.0 equiv) | 74                          | 44                     |
| 5              | Mn (3.0 equiv) | 60                          | 17                     |

\*Conversions and yields were determined by <sup>1</sup>H NMR integration against mesitylene. <sup>†</sup>Particle size of Zn power: ~100 mesh. <sup>‡</sup>Particle size of Zn power: 20~30 mesh.

**Table S4. Screen of substrate stoichiometry.** Reaction conditions: 1-(2,2-dichlorovinyl)-4-methoxybenzene (**1**) (x mmol), 2,3-dimethyl-butadiene (y mmol), **L4** (5 mol%), Ni(DME)Br<sub>2</sub> (10 mol%), Zn (3.0 equiv), NMP (0.40 mL), 24 h, 22 °C.

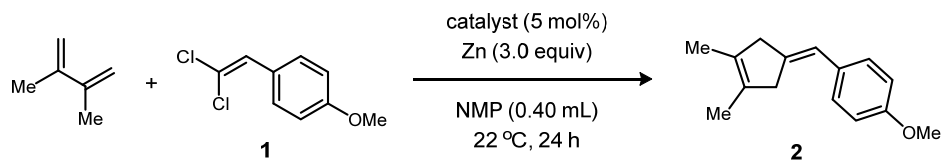

| entry | 2,3-dimethylbutadiene/ <b>1</b> (mmol) | conversion (%) <sup>*</sup> | yield (%) <sup>*</sup> |
|-------|----------------------------------------|-----------------------------|------------------------|
| 1     | 0.80/0.20                              | 83                          | 85                     |
| 2     | 0.40/0.20                              | >99                         | 99 (99) <sup>†</sup>   |
| 3     | 0.30/0.20                              | 98                          | 95 (90) <sup>†</sup>   |
| 4     | 0.24/0.20                              | 92                          | 92                     |
| 5     | 0.20/0.24                              | 78                          | 67                     |

\*Conversions and yields were determined by <sup>1</sup>H NMR integration against mesitylene. <sup>†</sup>Isolated yield.

### 3. Synthesis and Characterization of NDI Ligands and [NDI]Ni<sub>2</sub> Complexes

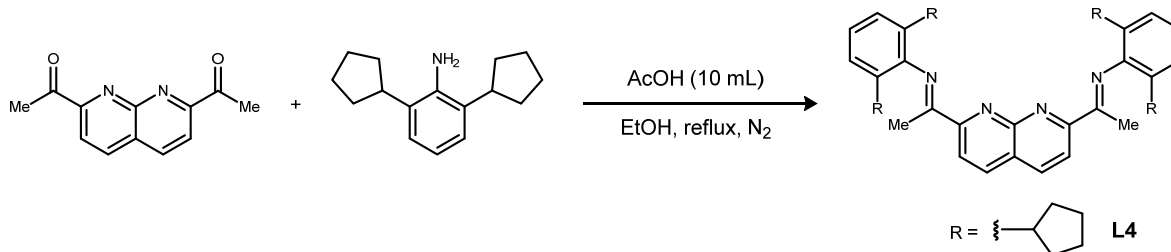

**L4.** 2,6-dicyclopentylaniline (0.48 g, 2.1 mmol, 2.1 equiv) and MeOH (10 mL) were added to a round bottom flask equipped with a reflux condenser and magnetic stir bar. 2,7-Diacetyl-1,8-naphthyridine (214 mg, 2.0 mmol, 1.0 equiv) was added followed by AcOH (10  $\mu$ L). The reaction mixture was stirred at reflux under an atmosphere of N<sub>2</sub> for 48 h. The reaction mixture was cooled to room temperature and concentrated to dryness under reduced pressure. The residue was washed with four 2-mL portions of MeOH cooled to 0 °C. The solid material was dried under vacuum to provide **L4** as a yellow powder. 0.55 g, 86% yield.

<sup>1</sup>H NMR (800 MHz, CDCl<sub>3</sub>)  $\delta$  8.71 (d,  $J$  = 8.4 Hz, 2H), 8.37 (d,  $J$  = 8.4 Hz, 2H), 7.20 (d,  $J$  = 7.7 Hz, 4H), 7.10 (t,  $J$  = 7.7 Hz, 2H), 2.82 (ddd,  $J$  = 17.1, 9.3, 7.6 Hz, 4H), 2.45 (s, 6H), 2.00 (dtd,  $J$  = 13.7, 7.4, 3.8 Hz, 4H), 1.84 (dtd,  $J$  = 11.4, 7.3, 6.8, 3.3 Hz, 4H), 1.78 – 1.70 (m, 8H), 1.61 – 1.49 (m, 16H).

<sup>13</sup>C{<sup>1</sup>H} NMR (201 MHz, CDCl<sub>3</sub>)  $\delta$  167.79, 159.76, 155.12, 148.11, 137.39, 133.61, 124.48, 123.90, 123.80, 120.78, 40.61, 34.01, 33.99, 25.82, 25.80, 17.76.

HRMS (ESI): calcd for C<sub>44</sub>H<sub>53</sub>N<sub>4</sub><sup>+</sup> [M + H]<sup>+</sup>: 637.4265; found: 637.4268.

m.p.: 292 – 295 °C.

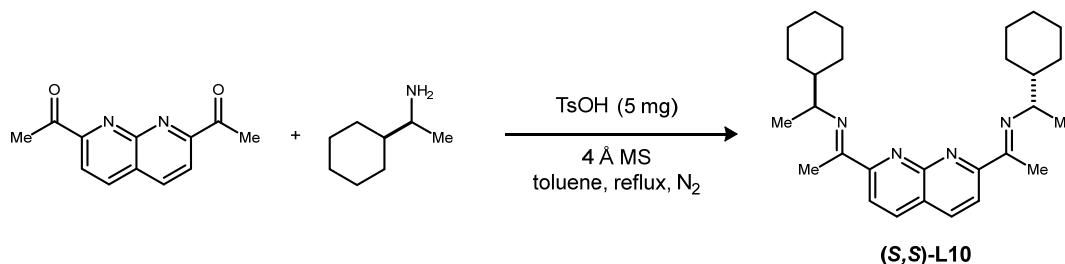

**(S,S)-L10 (37).** (*S*)-1-cyclohexylethylamine (0.52 g, 4.1 mmol, 2.2 equiv), toluene (40 mL) and 4 Å MS (approximately 5.0 g) were added to a round bottom flask equipped with a reflux condenser and magnetic stir bar. 2,7-Diacetyl-1,8-naphthyridine (0.40 g mg, 1.9 mmol, 1.0 equiv) was added followed by TsOH (5.0 mg). The reaction mixture was stirred at reflux under an atmosphere of N<sub>2</sub> for 48 h. The reaction mixture was cooled to room temperature then filtered. The filtrate was concentrated to dryness under reduced pressure. The residue was dissolved in pentane, and the mixture was filtered through a glass fiber pad. The filtrate was concentrated to dryness, and the crude residue was heated at 60 °C under vacuum for 10 h to provide **(S,S)-L10** as a red-brown solid. 0.73 g, 90% yield,  $[\alpha]_D^{23}$  = 55.9 ° (c 0.272, CHCl<sub>3</sub>).

<sup>1</sup>H NMR (400 MHz, CDCl<sub>3</sub>)  $\delta$  8.36 (d,  $J$  = 8.4 Hz, 2H), 8.16 (d,  $J$  = 8.4 Hz, 2H), 3.56 (p,  $J$  = 6.5 Hz, 2H), 2.55 (s, 6H), 1.87 (d,  $J$  = 12.9 Hz, 2H), 1.82 – 1.63 (m, 8H), 1.55 (tdt,  $J$  = 11.1,



6.8, 3.3 Hz, 2H), 1.36 – 1.09 (m, 8H), 1.87 (d,  $J = 6.4$  Hz, 6H), 1.01 (dq,  $J = 15.5, 12.3, 3.5$  Hz, 4H).

$^{13}\text{C}\{^1\text{H}\}$  NMR (101 MHz,  $\text{CDCl}_3$ )  $\delta$  164.18, 161.59, 154.81, 136.72, 123.27, 120.59, 61.89, 44.68, 30.01, 29.95, 26.84, 26.60, 26.52, 18.52, 14.09.

HRMS (APCI): calcd for  $\text{C}_{28}\text{H}_{41}\text{N}_4^+ [\text{M} + \text{H}]^+$ : 433.3326; found: 433.3328.

m.p.: 79 – 83 °C

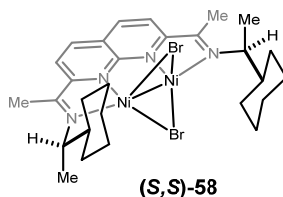

**(S,S)-58.** In an  $\text{N}_2$ -filled glovebox, a Schlenk tube was charged with **(S,S)-L10** (130 mg, 1.0 equiv),  $\text{Ni}(\text{COD})_2$  (86 mg, 1.0 equiv),  $\text{Ni}(\text{DME})\text{Br}_2$  (97.0 mg, 1.05 equiv), and THF (15 mL). The tube was sealed, and the reaction mixture was stirred at 60 °C for 24 h, during which time a green color developed. The reaction vessel was cooled to room temperature and unsealed in the glovebox. The reaction mixture was filtered through a glass fiber pad, and the filtrate was concentrated to dryness. The solid residue was washed with pentane (2 x 2 mL) and benzene (2 x 2 mL). The solid was re-dissolved in a minimal amount of THF (approx. 2.5 mL), and the solution was filtered through a glass fiber pad. To the filtrate was added an equal volume of  $\text{C}_6\text{H}_6$ . Pentane (approximately 15 mL) was carefully layered on top of the THF/ $\text{C}_6\text{H}_6$  solution. After the layers were allowed to slowly mix without agitation for 12 h, the mother liquor was decanted from the crystalline solid. The solid was washed with pentane (3 x 2 mL) and dried under reduced pressure to generate **(S,S)-58** (120.0 mg, 56% yield) as a dark green crystalline solid. Single crystals suitable for XRD were obtained by slow evaporation of a concentrated solution of **(S,S)-58** in THF.

$^1\text{H}$  NMR (400 MHz,  $\text{C}_6\text{D}_6$ )  $\delta$  102.07, 64.89, 24.71, 10.53, 10.14, 4.57, 3.25, 3.04, 2.53, 1.91, 1.69, 1.15, -52.12.

UV-vis (THF, nm  $\{\text{M}^{-1}\text{cm}^{-1}\}$ ): 261 {17421}, 352 {7960}, 568 {sh}, 671 {3666}.

$\mu_{\text{eff}} = 2.81 \mu_{\text{B}}$  (Evans method, 296 K, TMS in THF- $d_8$ ).

Anal. Calcd for  $(\text{C}_{28}\text{H}_{40}\text{Br}_2\text{N}_4\text{Ni}_2)$ : C 47.38, H 5.68, N 7.89; found: C 47.27, H 5.61, N 7.77.

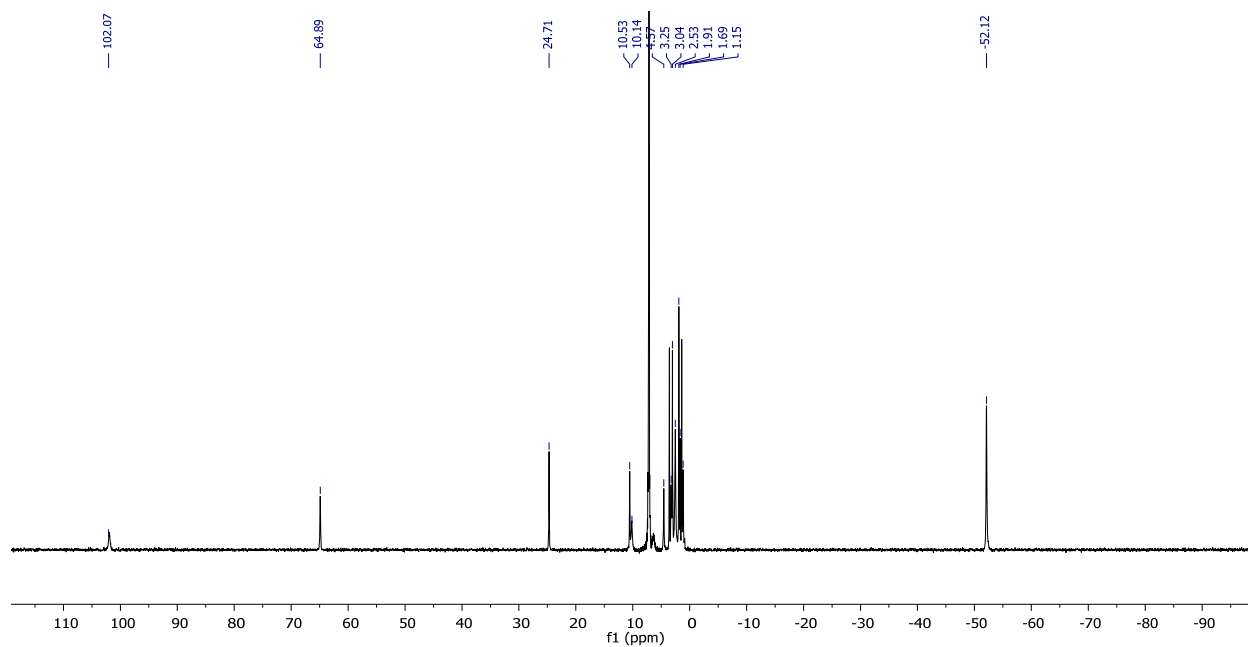

**Fig. S1.**  $^1\text{H}$  NMR spectrum of (*S,S*)-**58** ( $\text{C}_6\text{D}_6$ , room temperature).

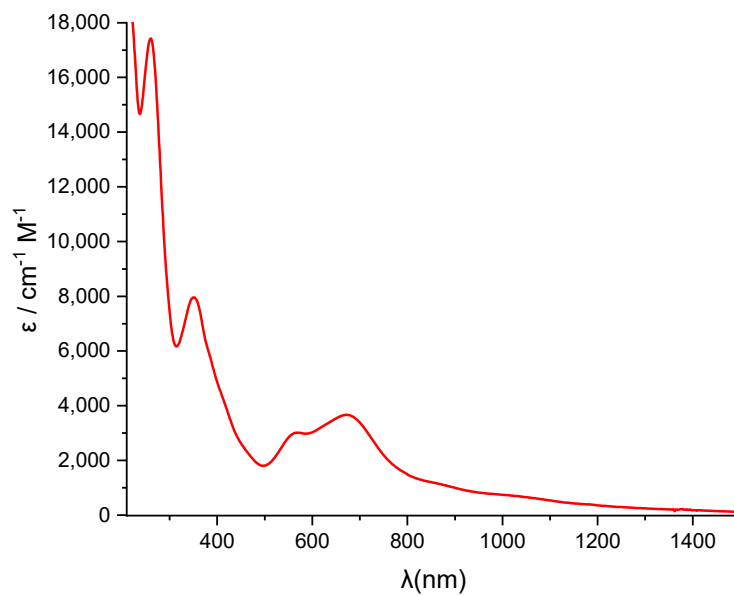

**Fig. S2.** UV-vis-NIR spectrum of (*S,S*)-**58** (0.74 mM in THF, room temperature).

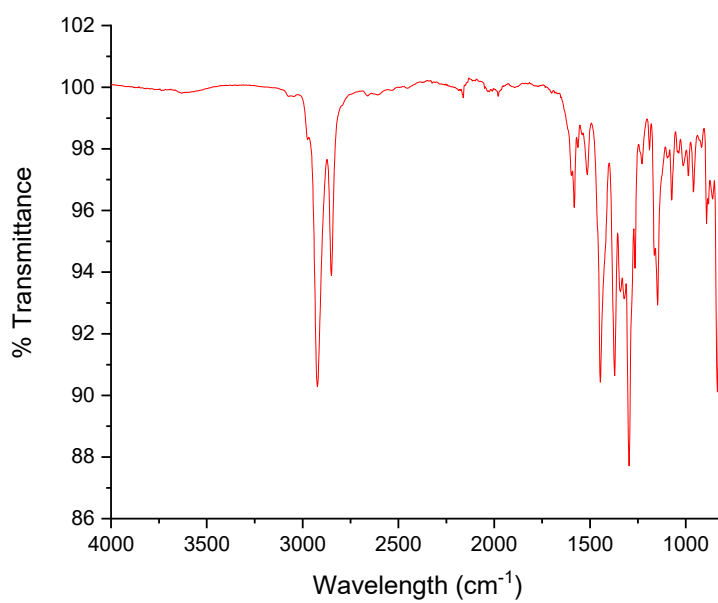

**Fig. S3.** ATR-IR spectrum of **(S,S)-58**.

## 4. Synthesis and Characterization of 1,1-Dichloroalkenes

**General Procedure A (38).** Under an N<sub>2</sub> atmosphere, a 100-mL Schlenk flask equipped a magnetic stir bar was charged with Ph<sub>3</sub>P (4.0 equiv) and MeCN (5 mL/mmol). With stirring, a solution of the aldehyde (1.0 equiv) and CCl<sub>4</sub> (2.0 equiv) in MeCN (2 mL/mmol) was added dropwise by syringe pump over 1 h. Following the addition, the reaction mixture was stirred for additional 2 h. The reaction mixture was then quenched by addition of H<sub>2</sub>O (150 mL). The product was extracted with Et<sub>2</sub>O (3 x 100 mL). The combined organic phases were dried over Na<sub>2</sub>SO<sub>4</sub> and filtered. The filtrate was evaporated to dryness under reduced pressure. The crude material was purified by column chromatography.

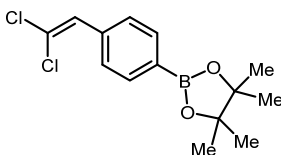

**2-(4-(2,2-dichlorovinyl)phenyl)-4,4,5,5-tetramethyl-1,3,2-dioxaborolane.** According to General Procedure A: 4-(4,4,5,5-tetramethyl-1,3,2-dioxaborolan-2-yl)benzaldehyde (1.62 g, 7.0 mmol, 1.0 equiv). The product was isolated as a colorless oil following purification by flash chromatography (SiO<sub>2</sub>, 1:9 to 1:3 CH<sub>2</sub>Cl<sub>2</sub>:hexane followed by 1:20 Et<sub>2</sub>O/hexane). 1.06 g, 51% yield.

<sup>1</sup>H NMR (400 MHz, CDCl<sub>3</sub>) δ 7.85 – 7.77 (m, 2H), 7.58 – 7.48 (m, 2H), 6.87 (s, 1H), 1.35 (s, 12H).

<sup>13</sup>C{<sup>1</sup>H} NMR (101 MHz, CDCl<sub>3</sub>) δ 136.11, 134.97, 128.78, 127.98, 121.96, 84.09, 25.02.  
HRMS (APCI): calcd for C<sub>14</sub>H<sub>17</sub>BCl<sub>2</sub>O<sub>2</sub><sup>+</sup> M<sup>+</sup>: 297.0730; found: 297.0727.

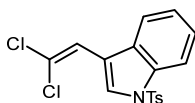

**3-(2,2-dichlorovinyl)-1-tosyl-1H-indole.** According to General Procedure A: 1-tosyl-1H-indole-3-carbaldehyde (2.10 g, 7.0 mmol, 1.0 equiv). The product was isolated as a pale yellow solid following purification by flash chromatography (SiO<sub>2</sub>, hexane to 1:3 CH<sub>2</sub>Cl<sub>2</sub>/hexane). 1.57g, 61% yield.

<sup>1</sup>H NMR (400 MHz, CDCl<sub>3</sub>) δ 8.12 (d, *J* = 0.8 Hz, 1H), 7.99 (dt, *J* = 8.3, 0.9 Hz, 1H), 7.82 – 7.77 (m, 2H), 7.52 (dt, *J* = 7.8, 1.0 Hz, 1H), 7.36 (ddd, *J* = 8.4, 7.2, 1.3 Hz, 1H), 7.30 – 7.27 (m, 1H), 7.26 – 7.22 (m, 2H), 6.93 (d, *J* = 0.8 Hz, 1H), 2.35 (s, 3H).

<sup>13</sup>C{<sup>1</sup>H} NMR (101 MHz, CDCl<sub>3</sub>) δ 145.45, 135.10, 134.29, 130.16, 129.65, 127.05, 125.53, 125.38, 123.74, 121.66, 118.90, 118.65, 115.57, 113.84, 21.7.

HRMS (APCI): calcd for C<sub>14</sub>H<sub>13</sub>Cl<sub>2</sub>NO<sub>2</sub>S<sup>+</sup> [M + H]<sup>+</sup>: 366.0117; found: 366.0114  
m.p.: 145 – 148 °C

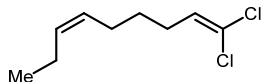

**(Z)-1,1-dichloronona-1,6-diene.** According to General Procedure A: (Z)-oct-5-enal (1.52 g, 12.0 mmol, 1.0 equiv). The product was isolated as a colorless oil following purification by flash chromatography (SiO<sub>2</sub>, hexane). 1.00 g, 43% yield.

<sup>1</sup>H NMR (800 MHz, CDCl<sub>3</sub>) δ 5.85 (t, *J* = 7.4 Hz, 1H), 5.44 – 5.38 (m, 1H), 5.33 – 5.28 (m, 1H), 2.18 (q, *J* = 7.5 Hz, 2H), 2.09 – 2.01 (m, 4H), 1.47 (p, *J* = 7.5 Hz, 2H), 0.97 (t, *J* = 7.5 Hz, 3H).

<sup>13</sup>C{<sup>1</sup>H} NMR (201 MHz, CDCl<sub>3</sub>) δ 132.67, 129.96, 128.19, 120.11, 29.34, 28.34, 26.65, 20.70, 14.47.

HRMS (APCI): calcd for C<sub>9</sub>H<sub>14</sub>Cl<sub>2</sub><sup>+</sup> M<sup>+</sup>: 192.0467; found: 192.0465.

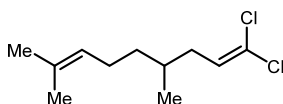

**1,1-dichloro-4,8-dimethylnona-1,7-diene.** According to General Procedure A: citronellal (0.63 g, 4.0 mmol, 1.0 equiv). The product was isolated as a colorless oil following purification by flash column chromatography (SiO<sub>2</sub>, hexane). 0.83 g, 91% yield.

<sup>1</sup>H NMR (800 MHz, CDCl<sub>3</sub>) δ 5.86 (t, *J* = 7.5 Hz, 1H), 5.08 (ddq, *J* = 8.5, 5.7, 1.4 Hz, 1H), 2.17 (ddd, *J* = 14.7, 7.3, 5.8 Hz, 1H), 2.08 – 1.92 (m, 3H), 1.69 (d, *J* = 1.4 Hz, 3H), 1.61 (s, 3H), 1.60 – 1.56 (m, 1H), 1.34 (ddt, *J* = 13.5, 9.5, 6.1 Hz, 1H), 1.20 (dddd, *J* = 13.6, 9.5, 7.8, 5.9 Hz, 1H), 0.91 (d, *J* = 6.7 Hz, 3H).

<sup>13</sup>C{<sup>1</sup>H} NMR (201 MHz, CDCl<sub>3</sub>) δ 131.65, 129.01, 124.56, 120.25, 36.88, 36.68, 32.46, 25.87, 25.67, 19.59, 17.81.

HRMS (APCI): calcd for C<sub>11</sub>H<sub>18</sub>Cl<sub>2</sub><sup>+</sup> M<sup>+</sup>: 220.0780; found: 220.0782.

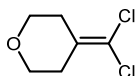

**4-(dichloromethylene)tetrahydro-2H-pyran.** According to General Procedure A: tetrahydro-4H-pyran-4-one (1.00 g, 10.0 mmol, 1.0 equiv). The product was isolated as a colorless oil following purification by flash column chromatography (SiO<sub>2</sub>, 1:20 Et<sub>2</sub>O/pentane). 1.14, 68% yield.

<sup>1</sup>H NMR (400 MHz, CDCl<sub>3</sub>) δ 3.69 (t, *J* = 5.6 Hz, 4H), 3.50 (t, *J* = 5.6 Hz, 4H).

<sup>13</sup>C{<sup>1</sup>H} NMR (101 MHz, CDCl<sub>3</sub>) δ 133.12, 113.55, 67.51, 32.17.

HRMS (APCI): calcd for C<sub>6</sub>H<sub>9</sub>Cl<sub>2</sub>O<sup>+</sup> [M + H]<sup>+</sup>: 167.0025; found: 167.0026.

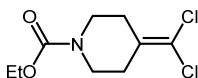

**Ethyl 4-(dichloromethylene)piperidine-1-carboxylate.** According to General Procedure A: ethyl 4-oxopiperidine-1-carboxylate (1.60 mL, 10.0 mmol, 1.0 equiv). The product was isolated as a colorless oil following purification by flash column chromatography (SiO<sub>2</sub>, 1:12 EtOAc/hexane). 1.38 g, 55% yield.

$^1\text{H}$  NMR (400 MHz,  $\text{CDCl}_3$ )  $\delta$  4.15 (q,  $J = 7.1$  Hz, 2H), 3.49 (t,  $J = 5.9$  Hz, 4H), 2.48 (t,  $J = 5.9$  Hz, 4H), 1.27 (t,  $J = 7.1$  Hz, 3H).

$^{13}\text{C}\{^1\text{H}\}$  NMR (101 MHz,  $\text{CDCl}_3$ )  $\delta$  155.54, 133.57, 114.28, 61.68, 43.39, 31.03, 14.83.

HRMS (ESI): calcd for  $\text{C}_9\text{H}_{14}\text{Cl}_2\text{NO}_2^+[\text{M} + \text{H}]^+$ : 239.0396; found: 239.0394.

m.p.: 50 – 52 °C

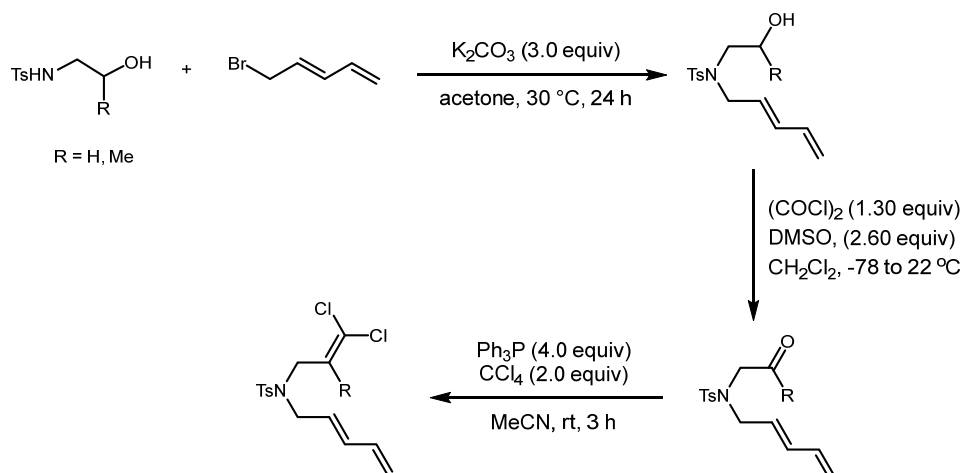

**Step 1 (General Procedure B) (39).** A 100-mL round bottom flask was charged with *N*-(2-hydroxyethyl)-4-methylbenzenesulfonamide or *N*-(2-hydroxypropyl)-4-methylbenzenesulfonamide (1.0 equiv), anhydrous acetone (1.5 mL/mmol) and  $\text{K}_2\text{CO}_3$  (3.0 equiv). A solution of (*E*)-5-bromopenta-1,3-diene (1.05 equiv) dissolved in anhydrous acetone (0.5 mL/mmol) was added, and the reaction mixture was stirred at 30 °C under  $\text{N}_2$ . After 24 h, the mixture was filtered, and the precipitate was washed several times with acetone. The filtrate was concentrated under reduced pressure. Water (20 mL) was added to the residue, and the product was extracted with  $\text{CH}_2\text{Cl}_2$  (100 mL). The organic phase was washed with brine, dried over  $\text{Na}_2\text{SO}_4$ , and filtered. The filtrate was concentrated to dryness under reduced pressure, and the crude product was carried forward into the next step without further purification.

**Step 2 (General Procedure C).** Under an  $\text{N}_2$  atmosphere, a solution of oxalyl chloride (1.30 equiv) in  $\text{CH}_2\text{Cl}_2$  (6 mL/mmol) was cooled to -78 °C (dry ice/acetone bath). A solution of DMSO (2.6 equiv) in  $\text{CH}_2\text{Cl}_2$  (1.5 mL/mmol) was added dropwise over 10 min. Following the addition, the reaction mixture was stirred at -78 °C for 30 min. A solution of the alcohol (1.0 equiv) in  $\text{CH}_2\text{Cl}_2$  (1.5 mL/mmol) was added dropwise over 10 min. The reaction was stirred for 1 h at -78 °C.  $\text{Et}_3\text{N}$  (5.2 equiv) was added dropwise over 10 min. After stirring for an additional 1 h at -78 °C, the reaction mixture was allowed to warm to room temperature. Once the reaction mixture reached room temperature, it was diluted with  $\text{CH}_2\text{Cl}_2$  (30 mL) and washed with water (2 x 30 mL) then brine (30 mL). The organic phase was dried over  $\text{Na}_2\text{SO}_4$  and filtered. The filtrate was concentrated under reduced pressure, and the crude product was carried forward into the next step without further purification.

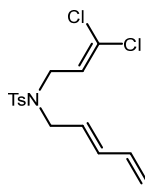

**(E)-N-(3,3-dichloroallyl)-4-methyl-N-(penta-2,4-dien-1-yl)benzenesulfonamide (48).**

According to General Procedure A: (*E*)-4-methyl-N-(2-oxoethyl)-N-(penta-2,4-dien-1-yl)benzenesulfonamide (2.80 g, 10.0 mmol, 1.0 equiv). The product was isolated as a white solid following purification by flash chromatography (SiO<sub>2</sub>, 1:3 to 1:1 CH<sub>2</sub>Cl<sub>2</sub>/hexane). 1.79 g, 52% yield.

<sup>1</sup>H NMR (800 MHz, CDCl<sub>3</sub>) δ 7.70 – 7.68 (m, 2H), 7.34 – 7.31 (m, 2H), 6.27 (dtd, *J* = 17.0, 10.3, 0.7 Hz, 1H), 6.13 (dtd, *J* = 15.2, 10.3, 0.7 Hz, 1H), 5.79 (t, *J* = 6.7 Hz, 1H), 5.49 (dtd, *J* = 15.2, 6.8, 0.7 Hz, 1H), 5.19 (dtd, *J* = 16.9, 1.4, 0.7 Hz, 1H), 5.11 (dtd, *J* = 10.1, 1.4, 0.7 Hz, 1H), 3.89 (d, *J* = 6.7 Hz, 2H), 3.81 (d, *J* = 6.7 Hz, 1H), 2.44 (s, 3H).

<sup>13</sup>C{<sup>1</sup>H} NMR (201 MHz, CDCl<sub>3</sub>) δ 143.84, 136.82, 135.78, 135.47, 129.99, 127.40, 127.37, 127.21, 125.30, 123.73, 118.66, 49.83, 45.78, 21.69.

HRMS (ESI): calcd for C<sub>15</sub>H<sub>17</sub>Cl<sub>2</sub>NO<sub>2</sub>SNa<sup>+</sup> [*M* + Na]<sup>+</sup>: 368.0249/370.0221; found: 368.0247/370.0220.

m.p.: 48 – 50 °C

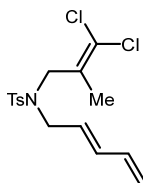

**(E)-N-(3,3-dichloro-2-methylallyl)-4-methyl-N-(penta-2,4-dien-1-yl)benzenesulfonamide (56).** According to General Procedure A: (*E*)-4-methyl-N-(2-oxopropyl)-N-(penta-2,4-dien-1-yl)benzenesulfonamide (2.35 g, 8.0 mmol, 1.0 equiv). The product was isolated as a white solid following purification by flash chromatography (1:3 to 1:1 CH<sub>2</sub>Cl<sub>2</sub>/hexane). 2.10 g, 73% yield.

<sup>1</sup>H NMR (400 MHz, CDCl<sub>3</sub>) δ 7.71 – 7.66 (m, 2H), 7.34 – 7.29 (m, 2H), 6.25 – 6.04 (m, 2H), 5.46 – 5.36 (m, 1H), 5.20 – 5.14 (m, 1H), 5.10 – 5.06 (m, 1H), 3.95 (s, 2H), 3.74 (dt, *J* = 7.0, 0.8 Hz, 2H), 2.44 (s, 3H), 1.92 (s, 3H).

<sup>13</sup>C{<sup>1</sup>H} NMR (101 MHz, CDCl<sub>3</sub>) δ 143.73, 136.81, 135.80, 135.38, 131.01, 129.95, 127.40, 126.86, 118.52, 118.38, 50.39, 50.04, 21.67, 18.07.

HRMS (APCI): calcd for C<sub>16</sub>H<sub>20</sub>Cl<sub>2</sub>NO<sub>2</sub>S<sup>+</sup> [*M* + H]<sup>+</sup>: 360.0586; found: 360.0590.

m.p.: 50 – 53 °C

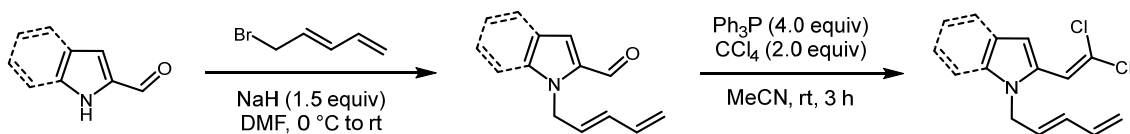

**General Procedure D.** Under an N<sub>2</sub> atmosphere, NaH (1.5 equiv, 60% wt. in mineral oil) was suspended in dry DMF (1.5 ml/mmol). A solution of the aldehyde (1.0 equiv) in DMF (1.5

ml/mmol) was added dropwise over 30 min at 0 °C. After stirring for 1 h at 0 °C, (*E*)-5-bromopenta-1,3-diene (1.5 equiv) was added dropwise over 10 min. The reaction mixture was allowed to warm to room temperature and stirred for an additional 2 h at room temperature. The reaction mixture was cooled to 0 °C, and the reaction was carefully quenched by slow addition of water (20 mL). The reaction mixture was extracted with Et<sub>2</sub>O (3 x 50 mL). The combined organic phases were washed with water (2 x 50 mL) and brine (50 mL), dried over MgSO<sub>4</sub>, and filtered. The filtrate was concentrated under reduced pressure. The crude product was purified by flash chromatography (SiO<sub>2</sub>, 1:9 to 1:4 EtOAc/hexane) to provide the corresponding aldehydes as pale yellow oils.

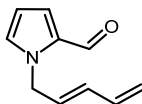

**(*E*)-1-(penta-2,4-dien-1-yl)-1H-pyrrole-2-carbaldehyde.** According to the General Procedure D: 1.20 g, 74% yield.

<sup>1</sup>H NMR (400 MHz, CDCl<sub>3</sub>) δ 9.55 (d, *J* = 1.1 Hz, 1H), 6.97 – 6.94 (m, 2H), 6.37 – 6.28 (m, 1H), 6.25 (dd, *J* = 4.0, 2.5 Hz, 1H), 6.11 – 6.02 (m, 1H), 5.84 (dtd, *J* = 15.2, 6.1, 0.7 Hz, 1H), 5.19 (ddt, *J* = 17.0, 1.5, 0.7 Hz, 1H), 5.10 (ddt, *J* = 10.2, 1.5, 0.7 Hz, 1H), 5.02 – 4.97 (m, 2H).

<sup>13</sup>C{<sup>1</sup>H} NMR (101 MHz, CDCl<sub>3</sub>) δ 179.57, 136.01, 133.49, 131.47, 131.00, 129.18, 124.82, 118.35, 110.08, 50.20.

HRMS (ESI): calcd for C<sub>10</sub>H<sub>12</sub>NO<sup>+</sup> [M + H]<sup>+</sup>: 162.0913; found: 162.0911.

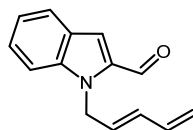

**(*E*)-1-(penta-2,4-dien-1-yl)-1H-indole-2-carbaldehyde.** According to General Procedure D: 0.48 g, 33% yield.

<sup>1</sup>H NMR (400 MHz, CDCl<sub>3</sub>) δ 9.89 (s, 1H), 7.75 (dt, *J* = 8.1, 1.0 Hz, 1H), 7.44 – 7.38 (m, 2H), 7.29 (s, 1H), 7.19 (ddd, *J* = 8.0, 5.5, 2.4 Hz, 1H), 6.26 (dt, *J* = 16.9, 10.2 Hz, 1H), 6.03 (ddtd, *J* = 14.8, 10.2, 1.5, 0.7 Hz, 1H), 5.91 – 5.79 (m, 1H), 5.29 – 5.24 (m, 2H), 5.12 (ddt, *J* = 16.9, 1.5, 0.7 Hz, 1H), 5.04 (ddt, *J* = 10.1, 1.5, 0.7 Hz, 1H).

<sup>13</sup>C{<sup>1</sup>H} NMR (101 MHz, CDCl<sub>3</sub>) δ 182.72, 140.42, 136.09, 135.24, 132.71, 129.01, 127.22, 126.66, 123.61, 121.25, 118.21, 117.90, 110.96, 46.07.

HRMS (ESI): calcd for C<sub>14</sub>H<sub>14</sub>NO<sup>+</sup> [M + H]<sup>+</sup>: 212.1070; found: 212.1069.

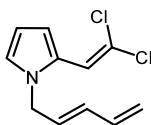

**(*E*)-2-(2,2-dichlorovinyl)-1-(penta-2,4-dien-1-yl)-1H-pyrrole (50).** According to General Procedure A: (*E*)-1-(penta-2,4-dien-1-yl)-1H-pyrrole-2-carbaldehyde (1.20 g, 8.0 mmol, 1.0 equiv). The product was isolated as a colorless oil following purification by flash column chromatography (SiO<sub>2</sub>, 1:20 to 1:9 CH<sub>2</sub>Cl<sub>2</sub>/hexane). 0.44 g, 24% yield.



$^1\text{H}$  NMR (400 MHz,  $\text{CDCl}_3$ )  $\delta$  6.87 – 6.82 (m, 1H), 6.70 (dd,  $J = 2.7, 1.6$  Hz, 1H), 6.65 (s, 1H), 6.33 (dt,  $J = 17.0, 10.2$  Hz, 1H), 6.24 (dd,  $J = 3.9, 2.7$  Hz, 1H), 5.99 – 5.89 (m, 1H), 5.76 (dt,  $J = 15.3, 5.4$  Hz, 1H), 5.23 – 5.17 (m, 1H), 5.15 – 5.10 (m, 1H), 4.54 (dd,  $J = 5.4, 1.6$  Hz, 2H).

$^{13}\text{C}\{^1\text{H}\}$  NMR (101 MHz,  $\text{CDCl}_3$ )  $\delta$  135.72, 133.01, 128.83, 125.84, 123.25, 118.61, 117.73, 117.42, 111.96, 108.93, 48.64.

HRMS (ESI): calcd for  $\text{C}_{11}\text{H}_{12}\text{Cl}_2\text{N}^+ [\text{M} + \text{H}]^+$ : 228.0341; found: 228.0340.

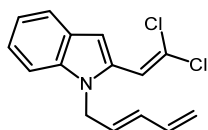

**(E)-2-(2,2-dichlorovinyl)-1-(penta-2,4-dien-1-yl)-1H-indole (52).** According to General Procedure A: (*E*)-1-(penta-2,4-dien-1-yl)-1H-indole-2-carbaldehyde. (0.48 g, 2.25 mmol, 1.0 equiv). The product was isolated as a white solid following purification by flash column chromatography ( $\text{SiO}_2$ , 1:9 to 1:4  $\text{CH}_2\text{Cl}_2$ /hexane). 0.15 g, 24% yield.

$^1\text{H}$  NMR (400 MHz,  $\text{CDCl}_3$ )  $\delta$  7.65 (dt,  $J = 7.9, 1.0$  Hz, 1H), 7.30 – 7.21 (m, 3H), 7.16 – 7.10 (m, 2H), 6.84 (d,  $J = 0.8$  Hz, 1H), 6.29 (dt,  $J = 17.0, 10.1$  Hz, 1H), 5.95 – 5.84 (m, 1H), 5.78 (dt,  $J = 15.4, 4.7$  Hz, 1H), 5.17 – 5.03 (m, 2H), 4.79 (d,  $J = 4.5$  Hz, 2H).

$^{13}\text{C}\{^1\text{H}\}$  NMR (101 MHz,  $\text{CDCl}_3$ )  $\delta$  136.82, 135.70, 132.43, 131.78, 128.36, 127.79, 123.27, 122.36, 121.42, 120.46, 118.38, 118.17, 109.59, 104.77, 44.69.

HRMS (ESI): calcd for  $\text{C}_{15}\text{H}_{14}\text{Cl}_2\text{N}^+ [\text{M} + \text{H}]^+$ : 278.0498; found: 278.0496.

m.p.: 43 – 45  $^\circ\text{C}$

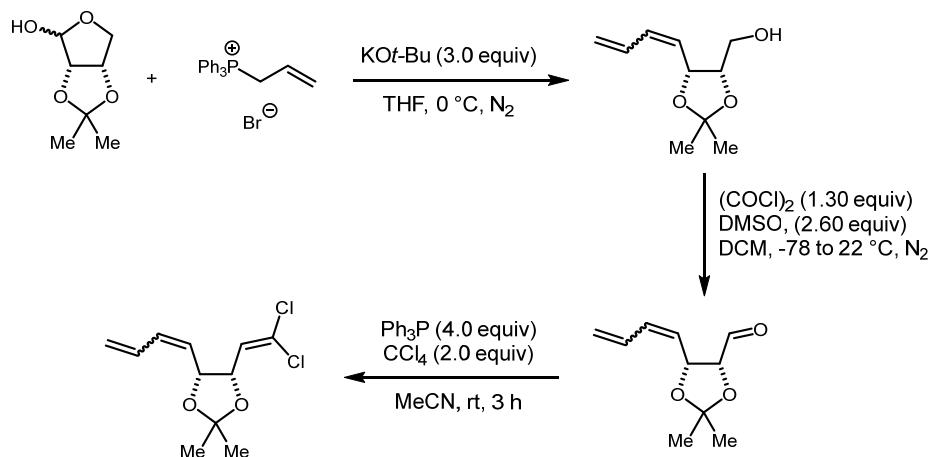

**Step 1 (40). ((4S,5R)-5-(buta-1,3-dien-1-yl)-2,2-dimethyl-1,3-dioxolan-4-yl)methanol.**

Under an  $\text{N}_2$  atmosphere, triphenylallylphosphonium bromide (12.65 g, 33 mmol, 3.3 equiv) was stirred in THF (50 mL).  $\text{KO}t\text{-Bu}$  (3.37 g, 30 mmol, 3.0 equiv) was added as a solid at 0  $^\circ\text{C}$ , and the reaction mixture was stirred at 0  $^\circ\text{C}$  for 1 h. A solution of (3a*S*,6a*S*)-2,2-dimethyltetrahydrofuro[3,4-*d*][1,3]dioxol-4-ol (*41*) (1.60 g, 10.0 mmol, 1.0 equiv) in THF (50 mL) added dropwise over 30 min, and the mixture was stirred for an additional 6 h at 0  $^\circ\text{C}$ . The reaction was quenched with saturated  $\text{NH}_4\text{Cl}$  (aq). The aqueous phase was extracted with  $\text{EtOAc}$  (2 x 100 mL), and the combined organic phases were dried over  $\text{MgSO}_4$  and filtered. The filtrate was concentrated under reduced pressure. The crude product was purified by flash

chromatograph (SiO<sub>2</sub>, 1:20 to 1:3 EtOAc/hexane) to afford a mixture of *Z* and *E* isomers as a colorless oil. 1.30 g, 71% yield, *E*:*Z* = 1:6.6.

<sup>1</sup>H NMR (400 MHz, CDCl<sub>3</sub>) δ 6.59 (dddd, *J* = 16.7, 11.2, 10.1, 1.1 Hz, 1H, *Z*), 6.42 – 6.28 (m, 2H, *E*), 6.21 (t, *J* = 11.2, 1H, *Z*), 5.71 (dd, *J* = 14.2, 7.7 Hz, 1H, *E*), 5.51 (t, *J* = 9.8, 1H, *Z*), 5.36 – 5.27 (m, 1H, *Z*), 5.25 (dd, *J* = 10.1, 1.8 Hz, 1H, *E*/*Z*), 5.14 (ddd, *J* = 8.4, 6.7, 1.3 Hz, 1H, *E*/*Z*), 4.69 (t, *J* = 7.3 Hz, 1H, *E*), 4.29 (dt, *J* = 6.8, 5.6 Hz, 1H, *Z*), 3.57 (t, *J* = 5.9 Hz, 2H, *E*/*Z*), 1.87 – 1.78 (m, 1H, *E*/*Z*), 1.52 (s, 3H, *E*/*Z*), 1.41 (s, 3H, *Z*), 1.39 (s, 3H, *E*).

*Z* isomer: <sup>13</sup>C {<sup>1</sup>H} NMR (101 MHz, CDCl<sub>3</sub>) δ 133.25, 131.27, 126.17, 120.76, 108.98, 78.63, 73.35, 62.21, 28.00, 25.32.

HRMS (ESI): calcd for C<sub>10</sub>H<sub>15</sub>O<sub>3</sub><sup>+</sup> [M - H]<sup>+</sup>: 183.1016; found: 183.1017.

### Step 2. (4*R*,5*R*)-5-(buta-1,3-dien-1-yl)-2,2-dimethyl-1,3-dioxolane-4-carbaldehyde.

Following General Procedure C for the Swern Oxidation. The crude product was carried forward into the next step without further purification.

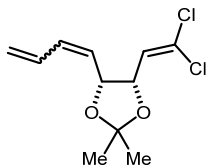

### (4*R*,5*S*)-4-(buta-1,3-dien-1-yl)-5-(2,2-dichlorovinyl)-2,2-dimethyl-1,3-dioxolane (54).

According to General Procedure A: (4*R*,5*R*)-5-(buta-1,3-dien-1-yl)-2,2-dimethyl-1,3-dioxolane-4-carbaldehyde (1.29 g, 7.0 mmol, *E*:*Z* = 1:7.0). The product was isolated as a colorless oil following purification by flash chromatography (SiO<sub>2</sub>, 1:9 to 1:3 CH<sub>2</sub>Cl<sub>2</sub>/pentane, then 1:20 Et<sub>2</sub>O/pentane). 0.77 g, 44% yield, *E*:*Z* = 1:6.6.

<sup>1</sup>H NMR (400 MHz, CDCl<sub>3</sub>) δ 6.61 (dddd, *J* = 16.7, 11.3, 10.1, 1.1 Hz, 1H, *Z*), 6.40 – 6.29 (m, 2H, *E*), 6.29 – 6.18 (m, 1H, *Z*), 5.93 (d, *J* = 8.5 Hz, 1H, *E*), 5.89 (d, *J* = 8.7 Hz, 1H, *Z*), 5.60 – 5.53 (m, 1H, *E*), 5.45 (ddq, *J* = 10.8, 8.5, 1.1 Hz, 1H, *E*), 5.39 – 5.29 (m, 2H, *Z*), 5.25 (dtd, *J* = 10.1, 1.6, 0.8 Hz, 1H, *Z*), 5.15 (ddd, *J* = 8.5, 6.2, 1.3 Hz, 1H, *Z*), 4.94 (dd, *J* = 8.7, 6.2 Hz, 1H, *Z*), 4.75 – 4.70 (m, 1H, *E*), 4.65 (td, *J* = 8.4, 1.2 Hz, 1H, *E*), 4.48 (t, *J* = 8.3 Hz, 1H, *E*), 1.51 (s, 3H, *Z*), 1.46 (s, 3H, *E*), 1.44 (s, 3H, *E*), 1.41 (d, *J* = 0.8 Hz, 3H, *Z*).

*Z* isomer: <sup>13</sup>C NMR (101 MHz, CDCl<sub>3</sub>) δ 133.92, 131.34, 126.78, 125.27, 120.87, 109.64, 76.52, 74.43, 28.25, 25.69.

HRMS (APCI): calcd for C<sub>11</sub>H<sub>13</sub>Cl<sub>2</sub>O<sub>2</sub><sup>+</sup> [M - H]<sup>+</sup>: 247.0287; found: 247.0286

## 5. Synthesis and Characterization of 1,3-Dienes

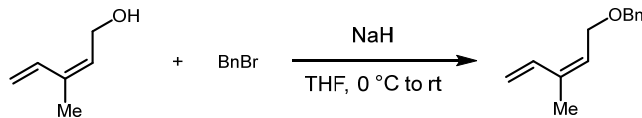

**(Z)-(((3-methylpenta-2,4-dien-1-yl)oxy)methyl)benzene (42).** Under an N<sub>2</sub> atmosphere, (Z)-3-methylpenta-2,4-dien-1-ol (0.16 g, 1.60 mmol, 1.0 equiv) was stirred in dry THF (5 mL) at 0 °C. Solid NaH (0.13 g, 3.2 mmol, 2.0 equiv, 60% wt. in mineral oil) was added, and the reaction mixture was stirred at 0 °C for 1 h. Benzyl bromide (2.4 mmol, 0.30 mL, 1.5 equiv) was added dropwise, and stirring was continued for 30 min at 0 °C. The reaction was warmed to room temperature and stirred for an additional 1 h. The reaction mixture was cooled to 0 °C and quenched with saturated NH<sub>4</sub>Cl (aq). The aqueous phase was extracted with Et<sub>2</sub>O (3 x 20 mL). The combined organic phases were dried over MgSO<sub>4</sub> and filtered. The filtrate was concentrated under reduced pressure. The crude product was purified by flash chromatography (SiO<sub>2</sub>, 1:9 to 1:4 EtOAc/hexane) to provide the diene as a colorless oil. 0.28 g, 93% yield.

<sup>1</sup>H NMR (400 MHz, CDCl<sub>3</sub>) δ 7.38 – 7.32 (m, 4H), 7.32 – 7.27 (m, 1H), 6.70 (dd, *J* = 10.8, 6.4 Hz, 1H), 5.60 (t, *J* = 6.8 Hz, 1H), 5.29 (d, *J* = 17.2 Hz, 1H), 5.16 (dt, *J* = 10.8, 1.6 Hz, 2H), 4.52 (s, 2H), 4.18 (d, *J* = 6.9 Hz, 2H), 1.88 (s, 3H).

<sup>13</sup>C{<sup>1</sup>H} NMR (101 MHz, CDCl<sub>3</sub>) δ 138.49, 136.38, 133.33, 128.53, 127.98, 127.75, 126.52, 115.46, 72.35, 65.64, 19.87.

HRMS (APCI): calcd for C<sub>13</sub>H<sub>15</sub>O<sup>+</sup> [M - H]<sup>+</sup>: 187.1117; found: 187.1119.

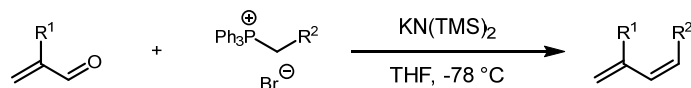

**General Procedure E (43).** Under an N<sub>2</sub> atmosphere, a flame-dried round bottom flask was charged with a magnetic stir bar, the phosphonium salt (1.0 equiv), and THF (20 mL/mmol). The suspension was stirred at -78 °C. K[N(TMS)<sub>2</sub>] (1.0 equiv) was added, and the resulting orange solution was stirred at -78 °C for 1 h. A second flame-dried round bottom flask was charged with the aldehyde (1.5 equiv) and THF (10 mL/mmol). The aldehyde solution was cooled to -78 °C then slowly transferred via cannula to the orange solution of the ylide. The reaction mixture was stirred for 1 h at -78 °C then for 1 h at room temperature. The reaction volume was concentrated to 1/4 of the original volume. The crude mixture was diluted with pentane (150 mL) and washed with water (2 x 50 mL) and brine (50 mL). The organic phase was dried over NaSO<sub>4</sub>, and filtered. The filtrate was concentrated under reduced pressure, and the crude product was purified by flash column chromatography.

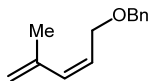

**(Z)-(((4-methylpenta-2,4-dien-1-yl)oxy)methyl)benzene.** According to the General Procedure E: 1.29 g, 69% yield.

<sup>1</sup>H NMR (800 MHz, CDCl<sub>3</sub>) δ 7.37 – 7.34 (m, 4H), 7.31 – 7.28 (m, 1H), 6.02 (d, *J* = 11.9 Hz, 1H), 5.67 (dt, *J* = 12.2, 6.2 Hz, 2H), 5.00 (s, 1H), 4.77 (s, 1H), 4.53 (s, 2H), 4.28 (d, *J* = 6.3 Hz, 2H), 1.85 (s, 3H).

$^{13}\text{C}\{^1\text{H}\}$  NMR (201 MHz,  $\text{CDCl}_3$ )  $\delta$  141.17, 138.45, 133.51, 128.51, 128.24, 127.95, 127.75, 116.51, 72.48, 67.14, 23.08.

HRMS (APCI): calcd for  $\text{C}_{13}\text{H}_{17}\text{NO}^+ [\text{M} + \text{H}]^+$ : 189.1274; found: 189.1272.

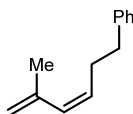

**(Z)-(5-methylhexa-3,5-dien-1-yl)benzene (59).** According to the General Procedure E: 1.40 g, 81% yield.

$^1\text{H}$  NMR (800 MHz,  $\text{CDCl}_3$ )  $\delta$  7.31 – 7.27 (m, 2H), 7.22 – 7.18 (m, 3H), 5.87 (d,  $J = 11.8$  Hz, 1H), 5.49 – 5.43 (m, 1H), 4.94 (s, 1H), 4.82 (s, 1H), 2.73 – 2.70 (m, 2H), 2.63 – 2.57 (m, 2H), 1.85 (s, 3H).

$^{13}\text{C}\{^1\text{H}\}$  NMR (201 MHz,  $\text{CDCl}_3$ )  $\delta$  142.00, 141.89, 131.52, 130.70, 128.59, 128.46, 125.99, 115.41, 36.50, 30.60, 23.46.

HRMS (APCI): calcd for  $\text{C}_{13}\text{H}_{17}^+ [\text{M} + \text{H}]^+$ : 173.1325; found: 173.1324.

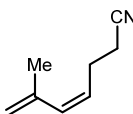

**(Z)-6-methylhepta-4,6-dienitrile.** According to the General Procedure E: 0.43 g, 36% yield.

$^1\text{H}$  NMR (800 MHz,  $\text{CDCl}_3$ )  $\delta$  6.00 (dq,  $J = 11.6, 1.6$  Hz, 1H), 5.39 (dt,  $J = 11.6, 7.3$  Hz, 1H), 5.02 (p,  $J = 1.7$  Hz, 1H), 4.84 (s, 1H), 2.62 (qd,  $J = 7.3, 1.8$  Hz, 2H), 2.40 (t,  $J = 7.2$  Hz, 2H), 1.87 (s, 3H).

$^{13}\text{C}\{^1\text{H}\}$  NMR (201 MHz,  $\text{CDCl}_3$ )  $\delta$  141.07, 134.26, 126.29, 119.39, 116.24, 24.55, 23.31, 17.93.

HRMS (APCI): calcd for  $\text{C}_{13}\text{H}_{16}\text{N}^+ [\text{M} + \text{H}]^+$ : 122.0964; found: 122.0962.

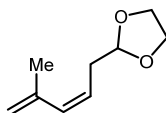

**(Z)-2-(4-methylpenta-2,4-dien-1-yl)-1,3-dioxolane.** According to the General Procedure E: 0.91 g, 59% yield.

$^1\text{H}$  NMR (400 MHz,  $\text{CDCl}_3$ )  $\delta$  6.00 (dq,  $J = 11.9, 1.7$  Hz, 1H), 5.49 (dt,  $J = 11.8, 7.3$  Hz, 1H), 4.98 (p,  $J = 1.8$  Hz, 1H), 4.92 (t,  $J = 4.7$  Hz, 1H), 4.89 (s, 1H), 4.04 – 3.94 (m, 2H), 3.92 – 3.82 (m, 2H), 2.68 (ddd,  $J = 7.0, 4.8, 1.9$  Hz, 2H), 1.88 (t,  $J = 1.2$  Hz, 3H).

$^{13}\text{C}\{^1\text{H}\}$  NMR (201 MHz,  $\text{CDCl}_3$ )  $\delta$  141.50, 133.72, 124.01, 115.95, 104.13, 65.12, 33.62, 23.38.

HRMS (APCI): calcd for  $\text{C}_9\text{H}_{13}\text{O}_2^+ [\text{M} - \text{H}]^+$ : 153.0910; found: 153.0907.

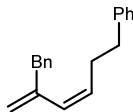

**(Z)-(2-methylenehex-3-ene-1,6-diyl)dibenzene.** According to the General Procedure E:  
0.95 g, 64% yield.

$^1\text{H}$  NMR (400 MHz,  $\text{CDCl}_3$ )  $\delta$  7.31 – 7.25 (m, 4H), 7.24 – 7.08 (m, 6H), 5.79 (dq,  $J = 11.7$ , 1.6 Hz, 1H), 5.48 (dt,  $J = 11.6$ , 7.1 Hz, 1H), 5.00 – 4.99 (m, 1H), 4.93 (s, 1H), 3.39 (s, 2H), 2.63 – 2.57 (m, 2H), 2.55 – 2.47 (m, 2H).

$^{13}\text{C}\{^1\text{H}\}$  NMR (101 MHz,  $\text{CDCl}_3$ )  $\delta$  144.49, 142.00, 139.63, 131.81, 130.14, 129.06, 128.58, 128.42, 128.41, 126.22, 125.95, 115.42, 43.82, 36.26, 30.67.

HRMS (ESI): calcd for  $\text{C}_{19}\text{H}_{19}^+$  [ $\text{M} - \text{H}$ ] $^+$ : 247.1481; found: 247.1479.

## 6. Intermolecular [4 + 1]-Cycloadditions

**General Procedure F.** In an N<sub>2</sub>-filled glovebox, a 3-dram vial was charged with the [NDI] ligand (5–10 mol%), Ni(DME)Br<sub>2</sub> (10–20 mol%), Zn powder (0.60 mmol), and a magnetic stir bar. The reaction solvent was added, and the resulting suspension was stirred for 15 min, during which time the catalyst solution turned purple. The diene and 1,1-dichloroalkene were successively added to the catalyst/reductant mixture. The vial was sealed, and the reaction mixture was stirred at room temperature. After 24 h, the reaction vial was opened to ambient atmosphere. The crude reaction mixture was directly loaded onto a SiO<sub>2</sub> column for purification.

**General Procedure G.** In an N<sub>2</sub>-filled glovebox, a 3-dram vial was charged with the [<sup>i</sup>-PrNDI]Ni<sub>2</sub>(C<sub>6</sub>H<sub>6</sub>) complex **3** (5–10 mol%), Zn powder (0.60 mmol), the reaction solvent, and a magnetic stir bar. The diene and 1,1-dichloroalkene were successively added to the catalyst/reductant mixture. The vial was sealed, and the reaction mixture was stirred at room temperature. After 24 h, the reaction vial was opened to ambient atmosphere. The crude reaction mixture was concentrated under reduced pressure, and the residue was directly loaded onto a SiO<sub>2</sub> column for purification.

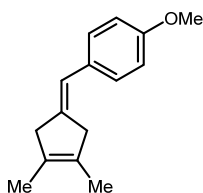

**1-((3,4-dimethylcyclopent-3-en-1-ylidene)methyl)-4-methoxybenzene (2).** According to General Procedure F: 1-(2,2-dichlorovinyl)-4-methoxybenzene (40.6 mg, 0.20 mmol, 1.0 equiv); 2,3-dimethylbutadiene (45  $\mu$ L, 0.40 mmol, 2.0 equiv); **L4** (6.4 mg, 0.01 mmol, 5 mol%) and Ni(DME)Br<sub>2</sub> (6.2 mg, 0.02 mmol, 10 mol%); rt for 24 h in NMP (0.40 mL). The product was isolated as a white solid following purification by column chromatography (SiO<sub>2</sub>, 1:4 CH<sub>2</sub>Cl<sub>2</sub>/hexanes). 42.7 mg, 99% yield.

**Benchtop Reaction:** A 3-dram vial was charged with Ni(DME)Br<sub>2</sub> (6.2 mg, 0.02 mmol, 10 mol%), **L4** ligand (6.4 mg, 0.01 mmol, 5 mol%), Zn powder (39.2 mg, 0.60 mmol), and a magnetic stir bar. After sealing with a rubber septum, the vial was evacuated and back-filled with N<sub>2</sub> three times. Dry NMP (0.40 mL) was added by syringe, and the resulting suspension was stirred for 15 min, during which time the catalyst solution turned purple. 2,3-Dimethylbutadiene (45  $\mu$ L, 0.40 mmol, 2.0 equiv) and 1-(2,2-dichlorovinyl)-4-methoxybenzene (40.6 mg, 0.20 mmol, 1.0 equiv) were successively added to the catalyst/reductant mixture. The reaction mixture was stirred at room temperature under N<sub>2</sub>. After 24 h, the reaction vial was opened to ambient atmosphere. The crude reaction mixture was directly loaded onto a SiO<sub>2</sub> column for purification. The product (**2**) was isolated as a white solid. 37.3 mg, 88% yield.

<sup>1</sup>H NMR (300 MHz, CDCl<sub>3</sub>)  $\delta$  7.30 – 7.20 (m, 2H), 6.92 – 6.84 (m, 2H), 6.30 (p,  $J$  = 2.4 Hz, 1H), 3.81 (s, 3H), 3.24 (s, br, 2H), 3.21 (s, br, 2H), 1.68 (m, 6H).

<sup>13</sup>C {<sup>1</sup>H} NMR (201 MHz, CDCl<sub>3</sub>)  $\delta$  157.78, 140.11, 131.50, 130.17, 129.62, 129.18, 121.16, 113.81, 55.40, 47.02, 43.61, 13.88, 13.54.

HRMS (APCI): calcd for C<sub>15</sub>H<sub>17</sub>O<sup>+</sup> [ $M - H$ ]<sup>+</sup> : 213.1274; found: 213.1276.

m.p.: 58 – 60 °C

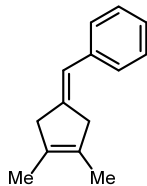

**((3,4-dimethylcyclopent-3-en-1-ylidene)methyl)benzene (4).** According to General Procedure F: (2,2-dichlorovinyl)benzene (34.6 mg, 0.20 mmol, 1.0 equiv); 2,3-dimethylbutadiene (45  $\mu$ L, 0.40 mmol, 2.0 equiv); **L4** (6.4 mg, 0.01 mmol, 5 mol%) and Ni(DME)Br<sub>2</sub> (6.2 mg, 0.02 mmol, 10 mol%); rt for 24 h in NMP (0.40 mL). The product was isolated as a colorless oil following purification by column chromatography (SiO<sub>2</sub>, pentane). 33.6 mg, 91% yield.

<sup>1</sup>H NMR (400 MHz, CDCl<sub>3</sub>)  $\delta$  7.36 – 7.29 (m, 4H), 7.20 -7.16 (m, 1H), 6.37 (q, *J* = 2.3 Hz, 1H), 3.29 (s, br, 1H), 3.25 (s, br, 1H), 1.77 – 1.65 (m, 6H).

<sup>13</sup>C{<sup>1</sup>H} NMR (101 MHz, CDCl<sub>3</sub>)  $\delta$  142.52, 138.57, 130.16, 129.51, 128.35, 128.07, 125.89, 121.85, 47.12, 43.70, 13.85, 13.52.

HRMS (APCI): calcd for C<sub>14</sub>H<sub>15</sub><sup>+</sup> [M – H]<sup>+</sup> : 183.1168; found: 183.1165.

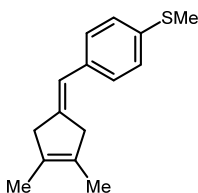

**(4-((3,4-dimethylcyclopent-3-en-1-ylidene)methyl)phenyl)(methyl)sulfane (5).**

According to General Procedure F: (4-(2,2-dichlorovinyl)phenyl)(methyl)sulfane (43.8 mg, 0.20 mmol, 1.0 equiv); 2,3-dimethylbutadiene (45  $\mu$ L, 0.40 mmol, 2.0 equiv); **L4** (6.4 mg, 0.01 mmol, 5 mol%) and Ni(DME)Br<sub>2</sub> (6.2 mg, 0.02 mmol, 10 mol%); rt for 24 h in NMP (0.40 mL). The product was isolated as a white solid following purification by column chromatography (SiO<sub>2</sub>, 1:4 CH<sub>2</sub>Cl<sub>2</sub>/pentane). 45.4 mg, 99% yield.

<sup>1</sup>H NMR (400 MHz, CDCl<sub>3</sub>)  $\delta$  7.23 (s, 4H), 6.31 (p, *J* = 2.4 Hz, 1H), 3.25 (s, br, 2H), 3.22 (s, br, 2H), 2.49 (s, 3H), 1.75 – 1.65 (m, 6H).

<sup>13</sup>C{<sup>1</sup>H} NMR (101 MHz, CDCl<sub>3</sub>)  $\delta$  142.26, 135.73, 135.52, 130.10, 129.55, 128.49, 126.86, 121.24, 47.14, 43.75, 16.25, 13.86, 13.51.

HRMS (APCI): calcd for C<sub>15</sub>H<sub>17</sub>S<sup>+</sup> [M – H]<sup>+</sup> : 229.1046; found: 229.1048.

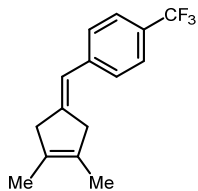

**1-((3,4-dimethylcyclopent-3-en-1-ylidene)methyl)-4-(trifluoromethyl)benzene (6).**

According to General Procedure F: 1-(2,2-dichlorovinyl)-4-(trifluoromethyl)benzene (48.2 mg, 0.20 mmol, 1.0 equiv); 2,3-dimethylbutadiene (45  $\mu$ L, 0.40 mmol, 2.0 equiv); **L4** (6.4 mg, 0.01 mmol, 5 mol%) and Ni(DME)Br<sub>2</sub> (6.2 mg, 0.02 mmol, 10 mol%); rt for 24 h in NMP (0.40 mL).

The product was isolated as a colorless oil following purification by column chromatography (SiO<sub>2</sub>, pentane). 37.0 mg, 73% yield.

<sup>1</sup>H NMR (400 MHz, CDCl<sub>3</sub>) δ 7.56 (d, *J* = 8.1 Hz, 1H), 7.38 (d, *J* = 8.1 Hz, 1H), 6.39 (p, *J* = 2.5 Hz, 1H), 3.27 (s, br, 1H), 3.26 (s, br, 1H), 1.69 (dhept, *J* = 2.2, 1.0 Hz, 6H).

<sup>13</sup>C{<sup>1</sup>H} NMR (201 MHz, CDCl<sub>3</sub>) δ 145.79, 141.98, 129.95, 129.51, 129.04, 128.09, 127.66 (q, *J* = 32.2 Hz) 125.28 (q, *J* = 4.0 Hz), 120.87, 47.25, 43.80, 13.83, 13.49.

<sup>19</sup>F NMR (282 MHz, CDCl<sub>3</sub>) δ -63.83.

HRMS (APCI): calcd for C<sub>15</sub>H<sub>14</sub>F<sub>3</sub><sup>+</sup> [M - H]<sup>+</sup> : 251.1042; found: 251.1044.

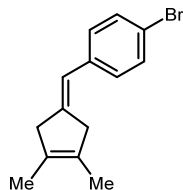

**1-bromo-4-((3,4-dimethylcyclopent-3-en-1-ylidene)methyl)benzene (7).** According to General Procedure F: 1-bromo-4-(2,2-dichlorovinyl)benzene (50.4 mg, 0.20 mmol, 1.0 equiv); 2,3-dimethylbutadiene (45 μL, 0.40 mmol, 2.0 equiv); **L4** (6.4 mg, 0.01 mmol, 5 mol%) and Ni(DME)Br<sub>2</sub> (6.2 mg, 0.02 mmol, 10 mol%); rt for 24 h in NMP (0.40 mL). The product was isolated as a white solid following purification by column chromatography (SiO<sub>2</sub>, pentane). 44.0 mg, 84% yield.

<sup>1</sup>H NMR (400 MHz, CDCl<sub>3</sub>) δ 7.47 – 7.40 (m, 2H), 7.19 – 7.13 (m, 2H), 6.29 (p, *J* = 2.4 Hz, 1H), 3.38 – 3.04 (m, 4H), 1.68 (ddq, *J* = 3.3, 2.2, 1.1 Hz, 6H).

<sup>13</sup>C{<sup>1</sup>H} NMR (101 MHz, CDCl<sub>3</sub>) δ 143.64, 137.44, 131.42, 129.99, 129.61, 129.54, 120.82, 119.54, 47.15, 43.68, 13.84, 13.50.

HRMS (APCI): calcd for C<sub>14</sub>H<sub>16</sub>Br<sup>+</sup> [M + H]<sup>+</sup>: 263.0430; found: 263.0428.

m.p.: 69 – 71 °C

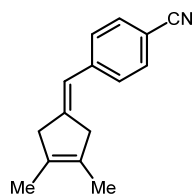

**4-((3,4-dimethylcyclopent-3-en-1-ylidene)methyl)benzonitrile (8).** According to General Procedure F: 4-(2,2-dichlorovinyl)benzonitrile (39.6 mg, 0.20 mmol, 1.0 equiv); 2,3-dimethylbutadiene (68 μL, 0.60 mmol, 3.0 equiv); **L4** (12.8 mg, 0.02 mmol, 10 mol%) and Ni(DME)Br<sub>2</sub> (12.4 mg, 0.04 mmol, 20 mol%); rt for 24 h in NMP (0.40 mL). The product was isolated as a white solid following purification by column chromatography (SiO<sub>2</sub>, 1:4 CH<sub>2</sub>Cl<sub>2</sub>/pentane). 24.0 mg, 57% yield.

<sup>1</sup>H NMR (400 MHz, CDCl<sub>3</sub>) δ 7.62 – 7.57 (m, 2H), 7.39 – 7.34 (m, 2H), 6.37 (p, *J* = 2.4 Hz, 1H), 3.26 (s, br, 4H), 1.88 – 1.58 (m, 6H).

<sup>13</sup>C{<sup>1</sup>H} NMR (101 MHz, CDCl<sub>3</sub>) δ 147.64, 142.99, 132.20, 129.80, 129.47, 128.40, 120.81, 119.45, 108.98, 47.43, 43.95, 13.79, 13.45.

HRMS (APCI): calcd for C<sub>15</sub>H<sub>14</sub>N<sup>+</sup> [M - H]<sup>+</sup>: 208.1121; found: 208.1123

m.p.: 98 – 102 °C



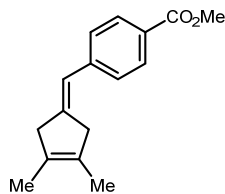

**methyl 4-((3,4-dimethylcyclopent-3-en-1-ylidene)methyl)benzoate (9).** According to General Procedure F: methyl 4-(2,2-dichlorovinyl)benzoate (46.2 mg, 0.20 mmol, 1.0 equiv); 2,3-dimethylbutadiene (68  $\mu$ L, 0.60 mmol, 3.0 equiv); **L4** (12.8 mg, 0.02 mmol, 10 mol%) and Ni(DME)Br<sub>2</sub> (12.4 mg, 0.04 mmol, 20 mol%); rt for 24 h in NMP (0.40 mL). The product was isolated as a white solid following purification by column chromatography (SiO<sub>2</sub>, 3:4 CH<sub>2</sub>Cl<sub>2</sub>/pentane). 43.7 mg, 90% yield.

<sup>1</sup>H NMR (400 MHz, CDCl<sub>3</sub>)  $\delta$  8.01 – 7.96 (m, 2H), 7.39 – 7.32 (m, 2H), 6.40 (p,  $J$  = 2.4 Hz, 1H), 3.91 (s, 3H), 3.29 (s, br, 2H), 3.26 (s, br, 2H), 1.73 – 1.66 (m, 6H).

<sup>13</sup>C{<sup>1</sup>H} NMR (101 MHz, CDCl<sub>3</sub>)  $\delta$  167.23, 146.06, 143.10, 129.99, 129.74, 129.44, 127.84, 127.29, 121.36, 52.12, 47.38, 43.94, 13.83, 13.48.

HRMS (APCI): calcd for C<sub>16</sub>H<sub>17</sub>O<sub>2</sub><sup>+</sup> [M – H]<sup>+</sup>: 241.1223; found: 241.1225.

m.p.: 74 – 76 °C

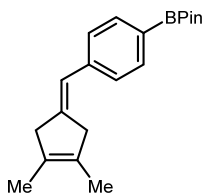

**2-(4-((3,4-dimethylcyclopent-3-en-1-ylidene)methyl)phenyl)-4,4,5,5-tetramethyl-1,3,2-dioxaborolane (10).** According to General Procedure F: 2-(4-(2,2-dichlorovinyl)phenyl)-4,4,5,5-tetramethyl-1,3,2-dioxaborolane (59.8 mg, 0.20 mmol, 1.0 equiv); 2,3-dimethylbutadiene (45  $\mu$ L, 0.40 mmol, 2.0 equiv); **L4** (6.4 mg, 0.01 mmol, 5 mol%) and Ni(DME)Br<sub>2</sub> (6.2 mg, 0.02 mmol, 10 mol%); rt for 24 h in NMP (0.40 mL). The product was isolated as colorless oil following purification by column chromatography (SiO<sub>2</sub>, 1:2:50 Et<sub>2</sub>O/CH<sub>2</sub>Cl<sub>2</sub>/pentane). 61.5 mg, 99% yield.

<sup>1</sup>H NMR (400 MHz, CDCl<sub>3</sub>)  $\delta$  7.80 – 7.72 (m, 2H), 7.34 – 7.27 (m, 2H), 6.37 (p,  $J$  = 2.4 Hz, 1H), 3.28 (s, br, 2H), 3.24 (s, br, 2H), 1.68 (m, 6H), 1.34 (s, 12H).

<sup>13</sup>C{<sup>1</sup>H} NMR (101 MHz, CDCl<sub>3</sub>)  $\delta$  144.01, 141.34, 134.88, 130.16, 129.43, 127.37, 122.04, 83.80, 47.26, 43.80, 25.02, 13.85, 13.50.

HRMS (ESI): calcd for C<sub>20</sub>H<sub>26</sub>BO<sub>2</sub><sup>+</sup> [M – H]<sup>+</sup>: 308.2057; found: 308.2065.

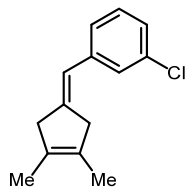

**1-chloro-3-((3,4-dimethylcyclopent-3-en-1-ylidene)methyl)benzene (11).** According to General Procedure F: 1-chloro-3-(2,2-dichlorovinyl)benzene (41.5 mg, 0.20 mmol, 1.0 equiv);

2,3-dimethylbutadiene (45  $\mu$ L, 0.40 mmol, 2.0 equiv); **L4** (6.4 mg, 0.01 mmol, 5 mol%) and Ni(DME)Br<sub>2</sub> (6.2 mg, 0.02 mmol, 10 mol%); rt for 24 h in NMP (0.40 mL). The product was isolated as a colorless oil following purification by column chromatography (SiO<sub>2</sub>, pentane). 39.2 mg, 90% yield.

<sup>1</sup>H NMR (400 MHz, CDCl<sub>3</sub>)  $\delta$  7.28 (t,  $J$  = 1.9 Hz, 1H), 7.27 – 7.22 (m, 1H), 7.19 – 7.12 (m, 2H), 6.30 (p,  $J$  = 2.5 Hz, 1H), 3.25 (s, br, 2H), 3.23 (s, br, 2H), 1.72 – 1.67 (m, 6H).

<sup>13</sup>C{<sup>1</sup>H} NMR (101 MHz, CDCl<sub>3</sub>)  $\delta$  144.44, 140.36, 134.25, 130.01, 129.54, 129.47, 127.86, 126.24, 125.87, 120.71, 47.15, 43.66, 13.84, 13.49.

HRMS (APCI): calcd for C<sub>14</sub>H<sub>14</sub>Cl<sup>+</sup> [M – H]<sup>+</sup>: 217.0779; found: 217.0782.

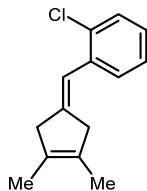

**1-chloro-2-((3,4-dimethylcyclopent-3-en-1-ylidene)methyl)benzene (12).** According to General Procedure F: 1-chloro-2-(2,2-dichlorovinyl)benzene (41.5 mg, 0.20 mmol, 1.0 equiv); 2,3-dimethylbutadiene (45  $\mu$ L, 0.40 mmol, 2.0 equiv); **L4** (12.8 mg, 0.02 mmol, 10 mol%) and Ni(DME)Br<sub>2</sub> (12.4 mg, 0.04 mmol, 20 mol%); rt for 24 h in NMP (0.40 mL). The product was isolated as a colorless oil following purification by column chromatography (SiO<sub>2</sub>, pentane). 37.5 mg, 86% yield.

<sup>1</sup>H NMR (400 MHz, CDCl<sub>3</sub>)  $\delta$  7.41 (dd,  $J$  = 7.8, 1.7 Hz, 1H), 7.36 (dd,  $J$  = 7.9, 1.4 Hz, 1H), 7.22 (td,  $J$  = 7.6, 1.4 Hz, 1H), 7.12 (td,  $J$  = 7.6, 1.7 Hz, 1H), 6.60 (p,  $J$  = 2.4 Hz, 1H), 3.26 (s, 2H), 3.17 (s, 2H), 1.68 (tq,  $J$  = 2.1, 1.1 Hz, 3H), 1.66 (tq,  $J$  = 2.2, 1.1 Hz, 3H).

<sup>13</sup>C{<sup>1</sup>H} NMR (101 MHz, CDCl<sub>3</sub>)  $\delta$  144.78, 136.39, 133.35, 129.97, 129.68, 129.54, 129.22, 127.28, 126.41, 118.37, 46.74, 43.09, 13.80, 13.55.

HRMS (ESI): calcd for C<sub>14</sub>H<sub>14</sub>Cl<sup>+</sup> [M – H]<sup>+</sup>: 217.0779; found: 217.0778.

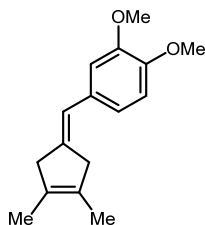

**4-((3,4-dimethylcyclopent-3-en-1-ylidene)methyl)-1,2-dimethoxybenzene (13).**

According to General Procedure F: 4-(2,2-dichlorovinyl)-1,2-dimethoxybenzene (46.6 mg, 0.20 mmol, 1.0 equiv); 2,3-dimethylbutadiene (45  $\mu$ L, 0.40 mmol, 2.0 equiv); **L4** (6.4 mg, 0.01 mmol, 5 mol%) and Ni(DME)Br<sub>2</sub> (6.2 mg, 0.02 mmol, 10 mol%); rt for 24 h in NMP (0.40 mL). The product was isolated as an off-white solid following purification by column chromatography (SiO<sub>2</sub>, 1:3 CH<sub>2</sub>Cl<sub>2</sub>/pentane). 41.1 mg, 84% yield.

<sup>1</sup>H NMR (400 MHz, CDCl<sub>3</sub>)  $\delta$  6.92 – 6.78 (m, 3H), 6.30 (p,  $J$  = 2.4 Hz, 1H), 3.90 (s, 3H), 3.88 (s, 3H), 3.25 (s, br, 2H), 3.22 (s, br, 2H), 1.68 (m, 6H).

<sup>13</sup>C{<sup>1</sup>H} NMR (201 MHz, CDCl<sub>3</sub>)  $\delta$  148.74, 147.36, 140.55, 131.84, 130.06, 129.66, 121.45, 120.51, 111.53, 111.21, 56.04, 55.97, 47.03, 43.55, 13.89, 13.54.

HRMS (APCI): calcd for C<sub>16</sub>H<sub>21</sub>O<sub>2</sub><sup>+</sup> [M + H]<sup>+</sup>: 245.1536; found: 245.1533  
m.p.: 70 – 73 °C

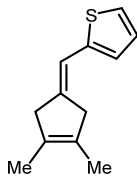

**2-((3,4-dimethylcyclopent-3-en-1-ylidene)methyl)thiophene (14).** According to General Procedure F: 2-(2,2-dichlorovinyl)thiophene (36.0 mg, 0.20 mmol, 1.0 equiv); 2,3-dimethylbutadiene (68 μL, 0.60 mmol, 3.0 equiv); **L4** (12.8 mg, 0.02 mmol, 10 mol%) and Ni(DME)Br<sub>2</sub> (12.8 mg, 0.04 mmol, 20 mol%); rt for 24 h in NMP (0.40 mL). The product was isolated as a yellow oil following purification by column chromatography (SiO<sub>2</sub>, pentane). 22.8 mg, 60% yield.

<sup>1</sup>H NMR (400 MHz, CDCl<sub>3</sub>) δ 7.22 (d, *J* = 5.1 Hz, 1H), 7.01 (dd, *J* = 5.1, 3.5 Hz, 1H), 6.90 (d, *J* = 3.6 Hz, 1H), 6.60 (p, *J* = 2.5 Hz, 1H), 3.23 – 3.20 (m, 4H), 1.72 (m, 3H), 1.68 (m, 3H).

<sup>13</sup>C{<sup>1</sup>H} NMR (101 MHz, CDCl<sub>3</sub>) δ 142.80, 141.04, 129.91, 129.70, 126.97, 124.75, 124.08, 115.37, 46.23, 44.21, 13.90, 13.56.

HRMS (APCI): calcd for C<sub>12</sub>H<sub>15</sub>S<sup>+</sup> [M + H]<sup>+</sup>: 191.0889; found: 191.0888.

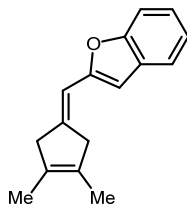

**2-((3,4-dimethylcyclopent-3-en-1-ylidene)methyl)benzofuran (15).** According to General Procedure F: 2-(2,2-dichlorovinyl)benzofuran (43.0 mg, 0.20 mmol, 1.0 equiv); 2,3-dimethylbutadiene (68 μL, 0.60 mmol, 3.0 equiv); **L4** (12.8 mg, 0.02 mmol, 10 mol%) and Ni(DME)Br<sub>2</sub> (12.4 mg, 0.04 mmol, 20 mol%); rt for 24 h in NMP (0.40 mL). The product was isolated as a pale yellow oil following purification by column chromatography (SiO<sub>2</sub>, 1:9 CH<sub>2</sub>Cl<sub>2</sub>/hexane). 37.1 mg, 83% yield.

<sup>1</sup>H NMR (400 MHz, CDCl<sub>3</sub>) δ 7.54 – 7.49 (m, 1H), 7.45 – 7.42 (m, 1H), 7.25 – 7.15 (m, 2H), 6.48 (s, 1H), 6.37 (p, *J* = 2.4 Hz, 1H), 3.40 (s, br, 2H), 3.27 (s, br, 2H), 1.74 (tq, *J* = 2.3, 1.1 Hz, 3H), 1.70 (tq, *J* = 2.3, 1.1 Hz, 3H).

<sup>13</sup>C{<sup>1</sup>H} NMR (101 MHz, CDCl<sub>3</sub>) δ 156.12, 154.31, 146.41, 130.13, 129.48, 129.30, 123.63, 122.71, 120.55, 111.01, 110.96, 102.97, 46.45, 44.63, 13.84, 13.53.

HRMS (ESI): calcd for C<sub>16</sub>H<sub>17</sub>O<sup>+</sup> [M + H]<sup>+</sup>: 225.1274; found: 225.1276

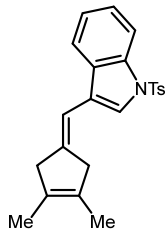

**3-((3,4-dimethylcyclopent-3-en-1-ylidene)methyl)-1-tosyl-1H-indole (16).** According to General Procedure F: 3-(2,2-dichlorovinyl)-1-tosyl-1H-indole (73.0 mg, 0.20 mmol, 1.0 equiv); 2,3-dimethylbutadiene (68  $\mu$ L, 0.60 mmol, 3.0 equiv); **L4** (12.8 mg, 0.02 mmol, 10 mol%) and Ni(DME)Br<sub>2</sub> (12.4 mg, 0.04 mmol, 20 mol%); rt for 24 h in NMP (0.40 mL). The product was isolated as a pale yellow solid following purification by column chromatography (SiO<sub>2</sub>, 1:4 CH<sub>2</sub>Cl<sub>2</sub>/hexane). 53.4 mg, 71% yield.

<sup>1</sup>H NMR (400 MHz, CDCl<sub>3</sub>)  $\delta$  7.98 (dt,  $J$  = 8.2, 0.9 Hz, 1H), 7.79 – 7.73 (m, 2H), 7.58 (dt,  $J$  = 7.7, 1.0 Hz, 1H), 7.44 (s, 1H), 7.32 (ddd,  $J$  = 8.4, 7.2, 1.3 Hz, 1H), 7.27 – 7.22 (m, 1H), 7.21 – 7.18 (m, 2H), 6.46 (p,  $J$  = 2.4 Hz, 1H), 3.27 (s, 2H), 3.20 (s, 2H), 2.32 (s, 3H), 1.75 (dq,  $J$  = 2.3, 1.1 Hz, 3H), 1.70 (dq,  $J$  = 2.2, 1.1 Hz, 3H).

<sup>13</sup>C{<sup>1</sup>H} NMR (101 MHz, CDCl<sub>3</sub>)  $\delta$  144.94, 144.25, 135.35, 129.96, 126.86, 124.96, 123.29, 122.23, 120.70, 119.46, 113.78, 110.06, 46.25, 44.97, 21.69, 13.94, 13.61.

HRMS (APCI): calcd for C<sub>23</sub>H<sub>24</sub>NO<sub>2</sub>S<sup>+</sup> [M + H]<sup>+</sup>: 378.1522; found: 378.1518.

m.p.: 173 – 176 °C

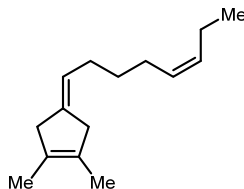

**(Z)-1,2-dimethyl-4-(oct-5-en-1-ylidene)cyclopent-1-ene (17).** According to General Procedure F: (Z)-1,1-dichloronona-1,6-diene (38.6 mg, 0.20 mmol, 1.0 equiv); 2,3-dimethylbutadiene (68  $\mu$ L, 0.60 mmol, 3.0 equiv); **L4** (12.8 mg, 0.02 mmol, 10 mol%) and Ni(DME)Br<sub>2</sub> (12.4 mg, 0.04 mmol, 20 mol%); rt for 24 h in NMP (0.40 mL). The product was isolated as a colorless oil following purification by column chromatography (SiO<sub>2</sub>, pentane). 28.2 mg, 69% yield.

<sup>1</sup>H NMR (400 MHz, CDCl<sub>3</sub>)  $\delta$  5.41 – 5.29 (m, 2H), 5.26 (tp,  $J$  = 7.2, 2.4 Hz, 1H), 2.98 (tt,  $J$  = 2.6, 1.3 Hz, 2H), 2.91 (ddp,  $J$  = 3.6, 2.4, 1.2 Hz, 2H), 2.10 – 1.92 (m, 6H), 1.65 – 1.61 (m, 6H), 1.45 – 1.37 (m, 2H), 0.96 (t,  $J$  = 7.6 Hz, 3H).

<sup>13</sup>C{<sup>1</sup>H} NMR (101 MHz, CDCl<sub>3</sub>)  $\delta$  138.62, 131.89, 130.29, 129.76, 129.29, 121.32, 44.61, 41.37, 29.78, 29.33, 26.98, 20.68, 14.53, 13.88, 13.72.

HRMS (APCI): calcd for C<sub>15</sub>H<sub>25</sub><sup>+</sup> [M + H]<sup>+</sup>: 205.1951; found: 205.1950.

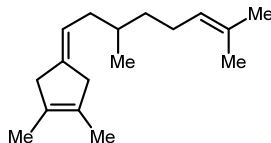

**4-(3,7-dimethyloct-6-en-1-ylidene)-1,2-dimethylcyclopent-1-ene (18).** According to General Procedure F: 1,1-dichloro-4,8-dimethylnona-1,7-diene (44.2 mg, 0.20 mmol, 1.0 equiv); 2,3-dimethylbutadiene (68  $\mu$ L, 0.60 mmol, 3.0 equiv); **L4** (12.8 mg, 0.02 mmol, 10 mol%) and Ni(DME)Br<sub>2</sub> (12.4 mg, 0.04 mmol, 20 mol%); rt for 24 h in NMP (0.40 mL). The product was isolated as a colorless oil following purification by column chromatography (SiO<sub>2</sub>, pentane). 32.2 mg, 69% yield.

<sup>1</sup>H NMR (400 MHz, CDCl<sub>3</sub>)  $\delta$  5.28 (tp,  $J$  = 7.2, 2.3 Hz, 1H), 5.10 (ddq,  $J$  = 8.5, 5.7, 1.4 Hz, 1H), 3.00 (dq,  $J$  = 2.5, 1.2 Hz, 2H), 2.91 (ddq,  $J$  = 3.7, 2.6, 1.2 Hz, 2H), 2.05 – 1.89 (m, 3H), 1.85 – 1.75 (m, 1H), 1.68 (q,  $J$  = 1.3 Hz, 3H), 1.64-1.61 (m, 6H), 1.61 (s, br, 3H), 1.54 – 1.44 (m, 1H), 1.36 (dddd,  $J$  = 13.2, 9.5, 6.3, 5.5 Hz, 1H), 1.14 (dddd,  $J$  = 13.6, 9.5, 7.8, 6.0 Hz, 1H), 0.88 (d,  $J$  = 6.7 Hz, 3H).

<sup>13</sup>C{<sup>1</sup>H} NMR (101 MHz, CDCl<sub>3</sub>)  $\delta$  138.99, 131.14, 130.28, 129.81, 125.20, 120.20, 44.66, 41.60, 37.06, 36.98, 33.29, 25.91, 25.88, 19.77, 17.79, 13.88, 13.72.

HRMS (APCI): calcd for C<sub>17</sub>H<sub>27</sub><sup>+</sup> [M + H]<sup>+</sup> : 231.2107; found: 231.2105.

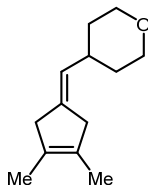

**4-((3,4-dimethylcyclopent-3-en-1-ylidene)methyl)tetrahydro-2H-pyran (19).** According to General Procedure F: 4-(2,2-dichlorovinyl)tetrahydro-2H-pyran (36.2 mg, 0.20 mmol, 1.0 equiv); 2,3-dimethylbutadiene (68  $\mu$ L, 0.60 mmol, 3.0 equiv); **L4** (12.8 mg, 0.02 mmol, 10 mol%) and Ni(DME)Br<sub>2</sub> (12.4 mg, 0.04 mmol, 20 mol%); rt for 24 h in NMP (0.40 mL). The product was isolated as a colorless oil following purification by column chromatography (SiO<sub>2</sub>, pentane). 35.4 mg, 92% yield.

<sup>1</sup>H NMR (800 MHz, CDCl<sub>3</sub>)  $\delta$  5.12 (dp,  $J$  = 9.2, 2.4 Hz, 1H), 3.94 (ddd,  $J$  = 11.5, 4.5, 2.1 Hz, 2H), 3.42 (td,  $J$  = 11.7, 2.2 Hz, 2H), 2.98 (q,  $J$  = 2.0 Hz, 2H), 2.96 (dq,  $J$  = 2.7, 1.4 Hz, 2H), 2.26 (dddd,  $J$  = 15.4, 11.2, 8.5, 4.1 Hz, 1H), 1.64 (tt,  $J$  = 2.3, 1.2 Hz, 3H), 1.62 (tt,  $J$  = 2.3, 1.1 Hz, 3H), 1.54 (ddq,  $J$  = 13.2, 4.2, 2.1 Hz, 2H), 1.42 (dtd,  $J$  = 13.5, 11.6, 4.4 Hz, 2H).

<sup>13</sup>C{<sup>1</sup>H} NMR (201 MHz, CDCl<sub>3</sub>)  $\delta$  137.95, 130.38, 129.59, 125.80, 68.01, 44.68, 41.15, 36.08, 32.71, 13.85, 13.70.

HRMS (APCI): calcd for C<sub>13</sub>H<sub>20</sub>O<sup>+</sup> M<sup>+</sup>: 192.1514; found: 192.1515.

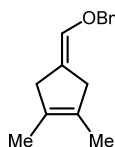

**(((3,4-dimethylcyclopent-3-en-1-ylidene)methoxy)methyl)benzene (20).** According to General Procedure F: (((2,2-dichlorovinyl)oxy)methyl)benzene (41.0 mg, 0.20 mmol, 1.0 equiv);

2,3-dimethylbutadiene (45  $\mu$ L, 0.40 mmol, 2.0 equiv); **L4** (12.8 mg, 0.02 mmol, 10 mol%) and Ni(DME)Br<sub>2</sub> (12.4 mg, 0.04 mmol, 20 mol%); rt for 24 h in NMP (0.40 mL). The product was isolated as a colorless oil following purification by column chromatography (SiO<sub>2</sub>, 1:4 CH<sub>2</sub>Cl<sub>2</sub>/pentane). 11.2 mg, 26% yield.

<sup>1</sup>H NMR (400 MHz, CDCl<sub>3</sub>)  $\delta$  7.39 – 7.32 (m, 4H), 7.32 – 7.27 (m, 1H), 6.06 – 6.03 (m, 1H), 4.78 (s, 2H), 3.04 (ddq,  $J$  = 3.3, 2.2, 1.1 Hz, 2H), 2.94 (pd,  $J$  = 2.2, 1.0 Hz, 2H), 1.64 (tq,  $J$  = 2.0, 1.0 Hz, 3H), 1.62 (tq,  $J$  = 2.2, 1.0 Hz, 3H).

<sup>13</sup>C {<sup>1</sup>H} NMR (201 MHz, CDCl<sub>3</sub>)  $\delta$  138.32, 137.80, 129.89, 129.75, 128.57, 127.83, 127.44, 117.16, 73.56, 40.50, 40.08, 13.82, 13.78.

HRMS (APCI): calcd for C<sub>15</sub>H<sub>19</sub>O<sup>+</sup> [M + H]<sup>+</sup>: 215.1430; found: 215.1429.

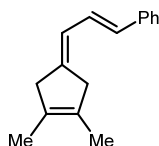

**(E)-3-(3,4-dimethylcyclopent-3-en-1-ylidene)prop-1-en-1-ylbenzene (21).** According to General Procedure F: (*E*)-(4,4-dichlorobuta-1,3-dien-1-yl)benzene (40.0 mg, 0.20 mmol, 1.0 equiv); 2,3-dimethylbutadiene (45  $\mu$ L, 0.40 mmol, 2.0 equiv); **L4** (6.4 mg, 0.01 mmol, 5 mol%) and Ni(DME)Br<sub>2</sub> (6.2 mg, 0.02 mmol, 10 mol%); rt for 24 h in NMP (0.40 mL). The product was isolated as a white solid following purification by column chromatography (SiO<sub>2</sub>, pentane). 34.5 mg, 82% yield.

<sup>1</sup>H NMR (800 MHz, CDCl<sub>3</sub>)  $\delta$  7.41 – 7.37 (m, 2H), 7.30 (t,  $J$  = 7.7 Hz, 2H), 7.21 – 7.16 (m, 1H), 6.85 (dd,  $J$  = 15.6, 10.9 Hz, 1H), 6.40 (d,  $J$  = 15.6 Hz, 1H), 6.14 – 6.10 (m, 1H), 3.21 (d,  $J$  = 3.3 Hz, 2H), 3.14 – 3.13 (m, 2H), 1.69 (tq,  $J$  = 2.2, 1.1 Hz, 3H), 1.66 (tq,  $J$  = 2.2, 1.1 Hz, 3H).

<sup>13</sup>C {<sup>1</sup>H} NMR (201 MHz, CDCl<sub>3</sub>)  $\delta$  144.29, 138.22, 129.96, 129.52, 129.27, 128.68, 127.05, 126.23, 121.71, 45.28, 42.10, 13.85, 13.69.

HRMS (ESI): calcd for C<sub>16</sub>H<sub>17</sub><sup>+</sup> [M – H]<sup>+</sup>: 209.1330; found: 209.1333.

m.p.: 49 – 52 °C

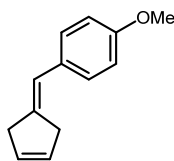

**1-(cyclopent-3-en-1-ylidene)methyl-4-methoxybenzene (22).** According to General Procedure G: 1-(2,2-dichlorovinyl)-4-methoxybenzene (40.6 mg, 0.20 mmol, 1.0 equiv); butadiene (13.5 mL of gas, 0.60 mmol, 3.0 equiv); [<sup>i</sup>-PrNDI]Ni<sub>2</sub>(C<sub>6</sub>H<sub>6</sub>) **3** (5 mol%); rt for 24 h in THF (1.80 mL). The product was isolated as a white solid following purification by column chromatography (SiO<sub>2</sub>, 1:4 CH<sub>2</sub>Cl<sub>2</sub>/hexanes). 33.3 mg, 90% yield.

<sup>1</sup>H NMR (400 MHz, CDCl<sub>3</sub>)  $\delta$  7.27–7.23 (m, 2H), 6.93 – 6.84 (m, 2H), 6.39 (p,  $J$  = 2.6 Hz, 1H), 5.85 (s, 2H), 3.82 (s, 3H), 3.31 (d,  $J$  = 2.6 Hz, 2H), 3.29 (d,  $J$  = 2.2 Hz, 2H).

<sup>13</sup>C {<sup>1</sup>H} NMR (101 MHz, CDCl<sub>3</sub>)  $\delta$  157.89, 140.33, 131.30, 129.89, 129.42, 129.19, 122.07, 113.85, 55.41, 41.44, 37.87.

HRMS (APCI): calcd for C<sub>13</sub>H<sub>13</sub>O<sup>+</sup> [M – H]<sup>+</sup>: 185.0961; found: 185.0962.

m.p.: 51 – 53 °C

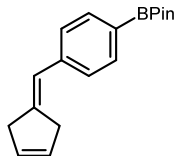

**2-(4-(cyclopent-3-en-1-ylidene)methyl)phenyl-4,4,5,5-tetramethyl-1,3,2-dioxaborolane (23).** According to General Procedure G: 2-(4-(2,2-dichlorovinyl)-phenyl)-4,4,5,5-tetramethyl-1,3,2-dioxaborolane (59.8 mg, 0.20 mmol, 1.0 equiv); butadiene (13.5 mL of gas, 0.60 mmol, 3.0 equiv); [*i*-Pr<sup>NDI</sup>]Ni<sub>2</sub>(C<sub>6</sub>H<sub>6</sub>) (5 mol%); rt for 24 h in THF (1.80 mL). The product was isolated as a colorless oil following purification by column chromatography (SiO<sub>2</sub>, 1:10:50 Et<sub>2</sub>O/CH<sub>2</sub>Cl<sub>2</sub>/hexanes). 46.7 mg, 83% yield.

<sup>1</sup>H NMR (400 MHz, CDCl<sub>3</sub>) δ 7.82 – 7.73 (m, 2H), 7.34 – 7.29 (m, 2H), 6.47 (p, *J* = 2.5 Hz, 1H), 5.85 (s, 2H), 3.35 (d, *J* = 2.6 Hz, 2H), 3.32 (d, *J* = 2.1 Hz, 2H), 1.35 (s, 12H).

<sup>13</sup>C{<sup>1</sup>H} NMR (101 MHz, CDCl<sub>3</sub>) δ 144.22, 141.12, 134.92, 129.87, 129.21, 127.36, 122.92, 83.82, 41.70, 38.14, 25.02.

HRMS (APCI): calcd for C<sub>18</sub>H<sub>24</sub>B<sup>10</sup>O<sub>2</sub><sup>+</sup> [M + H]<sup>+</sup>: 282.1900; found: 282.1897.

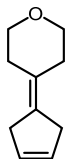

**4-(cyclopent-3-en-1-ylidene)tetrahydro-2H-pyran (24).** According to General Procedure F: 4-(dichloromethylene)tetrahydro-2H-pyran (33.4 mg, 0.20 mmol, 1.0 equiv); butadiene (13.5 mL of gas, 0.60 mmol, 3.0 equiv); (*S,S*)- **L10** (4.4 mg, 0.01 mmol, 5 mol%) and Ni(DME)Br<sub>2</sub> (6.2 mg, 0.02 mmol, 10 mol%); rt for 24 h in NMP (0.40 mL). The product was isolated as a colorless oil following purification by column chromatography (SiO<sub>2</sub>, 1:25 Et<sub>2</sub>O/hexanes). 13.8 mg, 43% yield.

<sup>1</sup>H NMR (400 MHz, CDCl<sub>3</sub>) δ 5.80 (m, 2H), 3.67 (t, *J* = 5.6, 4H), 3.10 – 2.94 (m, 4H), 2.22 (ddq, *J* = 6.8, 4.1, 1.4 Hz, 4H).

<sup>13</sup>C{<sup>1</sup>H} NMR (101 MHz, CDCl<sub>3</sub>) δ 131.07, 129.83, 125.61, 68.68, 36.33, 32.12.

HRMS (ESI): calcd for C<sub>10</sub>H<sub>15</sub>O<sup>+</sup> [M + H]<sup>+</sup>: 151.1117; found: 151.1116.

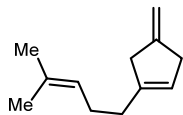

**4-methylene-1-(4-methylpent-3-en-1-yl)cyclopent-1-ene (25).** According to General Procedure F: 1,1-dichloroethene (16.0 μL, 0.20 mmol, 1.0 equiv); myrcene (70 μL, 0.40 mmol, 2.0 equiv); **L4** (12.8 mg, 0.02 mmol, 10 mol%) and Ni(DME)Br<sub>2</sub> (12.4 mg, 0.04 mmol, 20 mol%); rt for 24 h in NMP (0.40 mL). The product was isolated as a colorless oil following purification by column chromatography (SiO<sub>2</sub>, pentane). 19.2 mg, 59% yield.

<sup>1</sup>H NMR (400 MHz, CDCl<sub>3</sub>) δ 5.36 (ddt, *J* = 3.6, 2.4, 1.4 Hz, 1H), 5.12 (tdd, *J* = 6.7, 3.0, 1.5 Hz, 1H), 4.94 (ddd, *J* = 4.7, 3.6, 2.3, 1.2 Hz, 2H), 3.06 (h, *J* = 2.2 Hz, 2H), 3.00 (qd, *J* = 2.2, 1.1 Hz, 2H), 2.20 – 2.02 (m, 4H), 1.69 (d, *J* = 1.5 Hz, 3H), 1.69 (s, 3H).

$^{13}\text{C}\{^1\text{H}\}$  NMR (101 MHz,  $\text{CDCl}_3$ )  $\delta$  150.22, 143.82, 131.74, 124.41, 122.46, 106.70, 41.69, 39.27, 31.61, 26.38, 25.84, 17.84.

HRMS (ESI): calcd for  $\text{C}_{12}\text{H}_{17}^+$   $[\text{M} - \text{H}]^+$ : 161.1325; found: 161.1327.

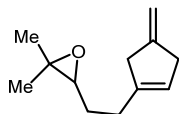

**2,2-dimethyl-3-(2-(4-methylenecyclopent-1-en-1-yl)ethyl)oxirane (26).** According to General Procedure F: 1,1-dichloroethene (16.0  $\mu\text{L}$ , 0.20 mmol, 1.0 equiv); 2,2-dimethyl-3-(3-methylenepent-4-en-1-yl)oxirane (60  $\mu\text{L}$ , 0.40 mmol, 2.0 equiv); **L4** (12.8 mg, 0.02 mmol, 10 mol%) and  $\text{Ni}(\text{DME})\text{Br}_2$  (12.4 mg, 0.04 mmol, 20 mol%); rt for 24 h in NMP (0.40 mL). The product was isolated as a colorless oil following purification by column chromatography ( $\text{SiO}_2$ , 1:20  $\text{Et}_2\text{O}$ /pentane). 15.5 mg, 44% yield

$^1\text{H}$  NMR (400 MHz,  $\text{CDCl}_3$ )  $\delta$  5.41 (ddt,  $J = 3.6, 2.4, 1.4$  Hz, 1H), 4.95 (dddp,  $J = 4.7, 3.5, 2.3, 1.2$  Hz, 2H), 3.06 (h,  $J = 2.2$  Hz, 2H), 3.02 (tp,  $J = 2.2, 1.0$  Hz, 2H), 2.73 (t,  $J = 6.2$  Hz, 1H), 2.31 – 2.14 (m, 2H), 1.69 (td,  $J = 7.7, 6.2$  Hz, 2H), 1.31 (s, 3H), 1.26 (s, 3H).

$^{13}\text{C}\{^1\text{H}\}$  NMR (101 MHz,  $\text{CDCl}_3$ )  $\delta$  149.75, 142.81, 123.14, 106.99, 64.26, 58.52, 41.62, 39.25, 28.26, 27.15, 25.02, 18.88.

HRMS (ESI): calcd for  $\text{C}_{14}\text{H}_{19}\text{O}^+$   $[\text{M} + \text{H}]^+$ : 179.1430; found: 179.1433.

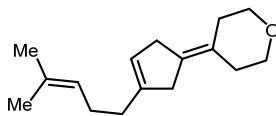

**4-(3-(4-methylpent-3-en-1-yl)cyclopent-3-en-1-ylidene)tetrahydro-2H-pyran (27).**

According to General Procedure F: 4-(dichloromethylene) tetrahydro-2H-pyran (33.4 mg, 0.20 mmol, 1.0 equiv); myrcene (70  $\mu\text{L}$ , 0.60 mmol, 3.0 equiv); (**S,S**)- **L10** (4.4 mg, 0.01 mmol, 5 mol%) and  $\text{Ni}(\text{DME})\text{Br}_2$  (6.2 mg, 0.02 mmol, 10 mol%); rt for 24 h in NMP (0.40 mL). The product was isolated as a colorless oil following purification by column chromatography ( $\text{SiO}_2$ , 1:25  $\text{Et}_2\text{O}$ /hexanes). 32.3 mg, 70% yield.

$^1\text{H}$  NMR (400 MHz,  $\text{CDCl}_3$ )  $\delta$  5.42 – 5.40 (m, 1H), 5.12 (m, 1H), 3.67 (td,  $J = 5.5, 2.5$  Hz, 4H), 3.00 (s, 2H), 2.95 (s, 2H), 2.21 (q,  $J = 5.8$  Hz, 4H), 2.17 – 2.07 (m, 4H), 1.69 (s, 3H), 1.61 (s, 3H).

$^{13}\text{C}\{^1\text{H}\}$  NMR (101 MHz,  $\text{CDCl}_3$ )  $\delta$  143.54, 131.74, 125.34, 124.42, 122.36, 68.70, 38.97, 36.46, 32.06, 31.79, 31.70, 26.42, 25.84, 17.85.

HRMS (ESI): calcd for  $\text{C}_{10}\text{H}_{25}\text{O}^+$   $[\text{M} + \text{H}]^+$ : 233.1900; found: 233.1902.

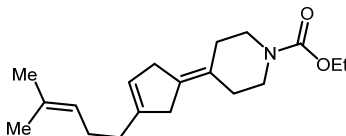

**ethyl 4-(3-(4-methylpent-3-en-1-yl)cyclopent-3-en-1-ylidene)piperidine-1-carboxylate (28).** According to General Procedure F: 4-(dichloromethylene)tetrahydro-2H-pyran (47.6 mg, 0.20 mmol, 1.0 equiv); myrcene (70  $\mu\text{L}$ , 0.40 mmol, 2.0 equiv); (**S,S**)- **L10** (4.4 mg, 0.01 mmol,



5 mol%) and Ni(DME)Br<sub>2</sub> (6.2 mg, 0.02 mmol, 10 mol%); rt for 24 h in NMP (0.40 mL). The product was isolated as a pale yellow oil following purification by column chromatography (SiO<sub>2</sub>, 1:25 Et<sub>2</sub>O/hexanes). 30.5 mg, 50% yield.

<sup>1</sup>H NMR (400 MHz, CDCl<sub>3</sub>) δ 5.45 – 5.38 (m, 1H), 5.16 – 5.07 (m, 1H), 4.14 (q, *J* = 7.1 Hz, 2H), 3.51 – 3.40 (m, 4H), 3.00 (s, 2H), 2.95 (s, 2H), 2.23 – 2.05 (m, 8H), 1.69 (d, *J* = 1.4 Hz, 3H), 1.61 (s, 3H), 1.27 (t, *J* = 7.1 Hz, 3H).

<sup>13</sup>C{<sup>1</sup>H} NMR (101 MHz, CDCl<sub>3</sub>) δ 155.81, 143.52, 132.70, 131.77, 125.74, 124.39, 122.34, 61.33, 44.52, 39.16, 36.65, 31.67, 30.66, 30.38, 26.41, 25.84, 17.86, 14.88.

HRMS (ESI): calcd for C<sub>19</sub>H<sub>29</sub>NO<sub>2</sub><sup>+</sup> [M – H]<sup>+</sup>: 302.2115; found: 302.2109.

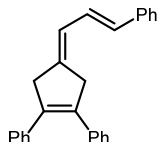

**(*E*)-4-(3-phenylallylidene)cyclopent-1-ene-1,2-diyl dibenzene (29).** According to General Procedure F: (*E*)-(4,4-dichlorobuta-1,3-dien-1-yl)benzene (40.0 mg, 0.20 mmol, 1.0 equiv); 2,3-diphenyl-butadiene (124.0 mg, 0.60 mmol, 3.0 equiv); **L4** (12.8 mg, 0.02 mmol, 10 mol%) and Ni(DME)Br<sub>2</sub> (12.4 mg, 0.04 mmol, 20 mol%); rt for 24 h in NMP (0.40 mL). The product was isolated as a white solid following purification by column chromatography (SiO<sub>2</sub>, pentane). 30.3 mg, 45% yield.

<sup>1</sup>H NMR (400 MHz, CDCl<sub>3</sub>) δ 7.46 – 7.41 (m, 2H), 7.34 – 7.30 (m, 2H), 7.28 – 7.17 (m, 11H), 6.93 (dd, *J* = 15.6, 10.9 Hz, 1H), 6.49 (d, *J* = 15.6 Hz, 1H), 6.27 (dp, *J* = 11.0, 2.4 Hz, 1H), 3.86 (d, *J* = 2.6 Hz, 2H), 3.79 (s, 2H).

<sup>13</sup>C{<sup>1</sup>H} NMR (101 MHz, CDCl<sub>3</sub>) δ 141.70, 138.00, 137.88, 137.71, 136.07, 135.72, 130.22, 128.74, 128.36, 128.33, 128.28, 128.25, 127.29, 127.11, 127.08, 126.47, 126.35, 122.70, 45.79, 42.73.

HRMS (APCI): calcd for C<sub>26</sub>H<sub>23</sub><sup>+</sup> [M + H]<sup>+</sup>: 335.1794; found: 335.1797.

m.p.: 149 – 152 °C

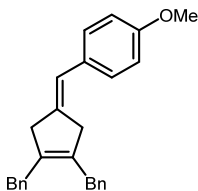

**((4-(4-methoxybenzylidene)cyclopent-1-ene-1,2-diyl)bis(methylene))dibenzene (30).** According to General Procedure F: 1-(2,2-dichlorovinyl)-4-methoxybenzene (40.6 mg, 0.20 mmol, 1.0 equiv); 2,3-dibenzyl-butadiene (140.0 mg, 0.60 mmol, 3.0 equiv); **L4** (12.8 mg, 0.02 mmol, 10 mol%) and Ni(DME)Br<sub>2</sub> (12.4 mg, 0.04 mmol, 20 mol%); rt for 24 h in NMP (0.40 mL). The product was isolated as a white solid following purification by column chromatography (SiO<sub>2</sub>, 1:4 CH<sub>2</sub>Cl<sub>2</sub>/hexanes). 37.6 mg, 51% yield.

<sup>1</sup>H NMR (400 MHz, CDCl<sub>3</sub>) δ 7.33 – 7.25 (m, 4H), 7.23 – 7.19 (m, 2.5 Hz, 6H), 7.17 – 7.11 (m, 2H), 6.85 – 6.80 (m, 2H), 6.24 (p, *J* = 2.4 Hz, 1H), 3.78 (s, 3H), 3.61 (d, *J* = 7.1 Hz, 2H), 3.24 (d, *J* = 7.1 Hz, 2H).

$^{13}\text{C}$  NMR (101 MHz,  $\text{CDCl}_3$ )  $\delta$  157.79, 139.90, 139.78, 138.98, 134.43, 134.39, 131.19, 129.12, 128.81, 128.72, 128.64, 128.58, 126.19, 121.79, 113.80, 55.37, 44.65, 41.19, 34.94, 34.76.

HRMS (ESI): calcd for  $\text{C}_{27}\text{H}_{25}\text{O}^+$   $[\text{M} - \text{H}]^+$ : 365.1900; found: 365.1904.

m.p.: 79 – 81 °C

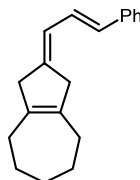

**(E)-2-(3-phenylallylidene)-1,2,3,4,5,6,7,8-octahydroazulene (31).** According to General Procedure F: (*E*)-(4,4-dichlorobuta-1,3-dien-1-yl)benzene (40.0 mg, 0.20 mmol, 1.0 equiv); 1,2-dimethylenecycloheptane (73.2 mg, 0.60 mmol, 3.0 equiv); **L4** (12.8 mg, 0.02 mmol, 10 mol%) and  $\text{Ni}(\text{DME})\text{Br}_2$  (12.4 mg, 0.04 mmol, 20 mol%); rt for 24 h in NMP (0.40 mL). The product was isolated as a colorless oil following purification by column chromatography ( $\text{SiO}_2$ , pentane). 50.7 mg, 99% yield.

$^1\text{H}$  NMR (400 MHz,  $\text{CDCl}_3$ )  $\delta$  7.42 – 7.37 (m, 2H), 7.32 – 7.27 (m, 2H), 7.22 – 7.15 (m, 1H), 6.83 (dd,  $J = 15.6, 10.9$  Hz, 1H), 6.39 (d,  $J = 15.6$  Hz, 1H), 6.12 – 6.04 (m, 1H), 3.27 (s, 2H), 3.20 (s, 2H), 2.19 – 2.08 (m, 4H), 1.74 – 1.66 (m, 2H), 1.64 – 1.57 (m, 4H).

$^{13}\text{C}\{^1\text{H}\}$  NMR (101 MHz,  $\text{CDCl}_3$ )  $\delta$  145.25, 138.25, 136.23, 135.79, 129.18, 128.68, 127.07, 127.02, 126.23, 121.62, 46.65, 43.43, 30.75, 30.29, 30.08, 27.72.

HRMS (ESI): calcd for  $\text{C}_{19}\text{H}_{21}^+$   $[\text{M} - \text{H}]^+$ : 249.1638; found: 249.1634.

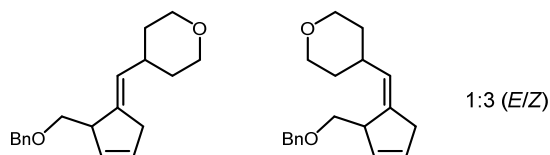

**4-((2-benzyloxy)methyl)cyclopent-3-en-1-ylidene)methyl tetrahydro-2H-pyran (32).** According to General Procedure G: 4-(2,2-dichlorovinyl)tetrahydro-2H-pyran (36.2 mg, 0.20 mmol, 1.0 equiv); (*Z*)-((penta-2,4-dien-1-yloxy)methyl)benzene (69.6 mg, 0.40 mmol, 2.0 equiv); [ $i\text{-Pr}$ NDI] $\text{Ni}_2(\text{C}_6\text{H}_6)$  **3** (14.6 mg, 10 mol%); rt for 24 h in  $\text{Et}_2\text{O}/\text{NMP}$  (1.60 mL/0.20 mL). The product was isolated as a colorless oil following purification by column chromatography ( $\text{SiO}_2$ , 1:19  $\text{Et}_2\text{O}/\text{pentane}$ ). 35.3 mg, 62% yield ( $E/Z = 1:3$ ).

$^1\text{H}$  NMR (800 MHz,  $\text{CDCl}_3$ )  $\delta$  7.36 – 7.32 (m, 4H, *E/Z*), 7.30 – 7.27 (m, 1H, *E/Z*), 5.95 – 5.80 (m, 2H, *E/Z*), 5.27 (dd,  $J = 9.0, 2.4$  Hz, 1H, *E*), 5.20 (dd,  $J = 9.9, 2.2$  Hz, 1H, *Z*), 4.56 – 4.49 (m, 2H, *E/Z*), 3.95 (ddd,  $J = 11.5, 4.4, 2.1$  Hz, 2H, *E*), 3.91 (ddd,  $J = 11.4, 4.7, 1.9$  Hz, 1H, *Z*), 3.83 (ddd,  $J = 11.5, 4.5, 2.0$  Hz, 1H, *Z*), 3.59 (ddd,  $J = 7.9, 5.8, 2.2$  Hz, 1H, *Z*), 3.50 (dt,  $J = 8.9, 5.6$  Hz, 1H, *E/Z*), 3.47 – 3.41 (m, 3H, *E*), 3.39 – 3.33 (m, 1H, *E/Z*), 3.29 (t,  $J = 8.5$  Hz, 1H, *Z*), 3.22 (td,  $J = 11.7, 2.6$  Hz, 1H, *Z*), 3.11 (dq,  $J = 20.4, 2.4$  Hz, 1H, *Z*), 3.08 – 3.00 (m, 2H, *E*), 2.91 (dq,  $J = 20.4, 2.0$  Hz, 1H, *Z*), 2.38 (qt,  $J = 10.9, 4.2$  Hz, 1H, *Z*), 2.29 (dddd,  $J = 15.3, 11.1, 8.5, 4.1$  Hz, 1H, *E*), 1.57 – 1.52 (m, 2H, *E*), 1.49 (ddq,  $J = 13.5, 4.2, 2.2$  Hz, 1H, *Z*), 1.47 – 1.42 (m, 2H, *E*), 1.42 – 1.32 (m, 3H, *Z*).

$^{13}\text{C}\{^1\text{H}\}$  NMR (201 MHz,  $\text{CDCl}_3$ )  $\delta$  139.61(*E*), 138.75(*E*), 138.69, 138.51, 132.73, 132.56, 130.89, 129.91(*E*), 129.11, 128.49, 127.81, 127.74, 127.65(*E*), 127.62(*E*), 75.11(*E*), 73.94, 73.29, 73.25(*E*), 67.92(*E*), 67.79, 67.65, 50.19(*E*), 47.73, 38.95, 36.23(*E*), 35.77(*E*), 35.64, 33.39, 33.03, 32.69(*E*), 32.51(*E*).

HRMS (ESI): calcd for  $\text{C}_{19}\text{H}_{25}\text{O}_2^+$  [ $\text{M} + \text{H}$ ] $^+$ : 285.1849; found: 285.1851.

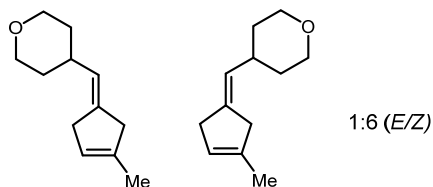

**4-((3-methylcyclopent-3-en-1-ylidene)methyl)tetrahydro-2H-pyran (33).** According to General Procedure G: 4-(2,2-dichlorovinyl)tetrahydro-2H-pyran (36.2 mg, 0.20 mmol, 1.0 equiv); isoprene (60  $\mu\text{L}$ , 0.40 mmol, 2.0 equiv); [ $i\text{-Pr}$ NDI] $\text{Ni}_2(\text{C}_6\text{H}_6)$  **3** (14.6 mg, 10 mol%); rt for 24 h in  $\text{Et}_2\text{O}/\text{NMP}$  (1.60 mL/0.20 mL). The product was isolated as a colorless oil following purification by column chromatography ( $\text{SiO}_2$ , 1:4 to 1:1  $\text{CH}_2\text{Cl}_2/\text{pentane}$ ). 34.9 mg, 98% yield (*E/Z* = 1:6).

$^1\text{H}$  NMR (800 MHz,  $\text{CDCl}_3$ )  $\delta$  5.36 (dp,  $J = 3.9, 1.9$  Hz, 1H, *Z*), 5.35-5.34 (m, 1H, *E*), 5.17 – 5.13 (m, 1H, *E/Z*), 3.94 (m, 2H, *E/Z*), 3.44 – 3.40 (m, 2H, *E/Z*), 3.02 (h,  $J = 2.3$  Hz, 2H, *Z*), 2.99 (h,  $J = 2.4$  Hz, 2H, *E*), 2.95 (s, 2H, *E*), 2.93 (s, 2H, *Z*), 2.29 – 2.24 (m, 1H, *E/Z*), 1.74 (tq,  $J = 2.5, 1.2$  Hz, 3H, *Z*), 1.72 (tt,  $J = 2.4, 1.2$  Hz, 3H, *E*), 1.57-1.53 (m, 2H, *E/Z*), 1.45 – 1.40 (m, 2H, *E/Z*).

$^{13}\text{C}\{^1\text{H}\}$  NMR (201 MHz,  $\text{CDCl}_3$ )  $\delta$  139.71(*E*), 139.55, 138.89, 126.35, 123.62, 122.89 (*E*), 67.99, 43.25(*E*), 39.78, 39.40, 36.28, 35.98(*E*), 35.82(*E*), 32.66, 16.98, 16.86(*E*).

HRMS (APCI): calcd for  $\text{C}_{12}\text{H}_{18}\text{O}^+$   $\text{M}^+$ : 178.1358; found: 178.1355.

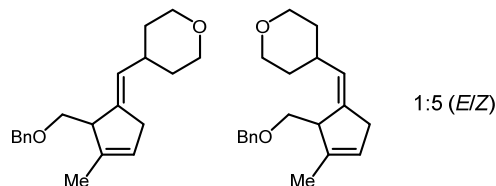

**4-((2-((benzyloxy)methyl)-3-methylcyclopent-3-en-1-ylidene)methyl)tetrahydro-2H-pyran (34).** According to General Procedure G: 4-(2,2-dichlorovinyl)tetrahydro-2H-pyran (36.2 mg, 0.20 mmol, 1.0 equiv); (*Z*)-(((3-methylpenta-2,4-dien-1-yl)oxy)methyl)benzene (75.2 mg, 0.40 mmol, 2.0 equiv); [ $i\text{-Pr}$ NDI] $\text{Ni}_2(\text{C}_6\text{H}_6)$  **3** (14.6 mg, 10 mol%); rt for 24 h in  $\text{Et}_2\text{O}/\text{NMP}$  (1.60 mL/0.20 mL). The product was isolated as a colorless oil following purification by column chromatography ( $\text{SiO}_2$ , 1:19  $\text{Et}_2\text{O}/\text{pentane}$ ). 37.3 mg, 62% yield (*E/Z* = 1:5).

$^1\text{H}$  NMR (800 MHz,  $\text{CDCl}_3$ )  $\delta$  7.35 – 7.31 (m, 4H, *E/Z*), 7.28 – 7.27 (m, 1H, *E/Z*), 5.48 – 5.46 (m, 1H, *E/Z*), 5.26 (dq,  $J = 8.9, 2.5$  Hz, 1H, *E*), 5.13 (dq,  $J = 9.9, 1.9$  Hz, 1H, *Z*), 4.56 – 4.46 (m, 2H, *E/Z*), 3.95 (dtt,  $J = 9.9, 4.0, 2.3$  Hz, 2H, *E*), 3.91 (ddd,  $J = 11.4, 4.6, 2.0$  Hz, 1H, *Z*), 3.80 (ddd,  $J = 11.4, 4.4, 2.2$  Hz, 1H, *Z*), 3.56 – 3.46 (m, 2H, *E/Z*), 3.43 (tt,  $J = 11.7, 2.5$  Hz, 2H, *E*), 3.36 (td,  $J = 11.8, 2.3$  Hz, 1H, *Z*), 3.33 (t,  $J = 5.4$  Hz, 1H, *Z*), 3.20 (td,  $J = 11.5, 2.9$  Hz, 1H, *Z*), 3.18 (t,  $J = 5.3$  Hz, 1H, *E*), 3.08 (ddq,  $J = 19.8, 5.0, 2.6$  Hz, 1H, *Z*), 2.98 (qh,  $J = 22.8, 20.5, 18.1, 2.4$  Hz, 2H, *E*), 2.81 (dp,  $J = 19.7, 2.0$  Hz, 1H, *Z*), 2.41 (dtd,  $J = 15.0, 10.9, 4.3$  Hz, 1H, *Z*),

2.30 (dddd,  $J = 16.1, 14.3, 7.9, 3.7$  Hz, 1H, **E**), 1.80 (dp,  $J = 2.7, 0.9$  Hz, 3H, **Z**), 1.77 (dp,  $J = 2.4, 1.2$  Hz, 3H, **E**), 1.58 – 1.53 (m, 2H, **E**), 1.49 (ddq,  $J = 13.4, 4.1, 2.1$  Hz, 1H, **Z**), 1.47 – 1.41 (m, 2H, **E**), 1.41 – 1.31 (m, 3H, **Z**)

$^{13}\text{C}\{^1\text{H}\}$  NMR (201 MHz,  $\text{CDCl}_3$ )  $\delta$  141.34(**E**), 141.15(**Z**), 141.12(**E**), 140.72(**Z**), 138.81(**E**), 138.57(**Z**), 128.46(**Z**), 128.44(**E**), 128.25(**Z**), 127.80(**Z**), 127.68(**Z**), 127.63(**E**), 127.56(**E**), 127.22(**E**), 124.94(**Z**), 124.07(**E**), 73.57(**E**), 73.37(**Z**), 73.30(**E**), 73.17(**Z**), 67.96(**E**), 67.83(**Z**), 67.72(**Z**), 53.00(**E**), 50.70(**Z**), 38.73(**Z**), 35.93(**E**), 35.32(**Z**), 35.08(**E**), 33.25(**Z**), 33.07(**Z**), 32.74(**E**), 32.61(**E**), 16.29(**Z**), 15.92(**E**).

HRMS (ESI): calcd for  $\text{C}_{20}\text{H}_{27}\text{O}_2^+$   $[\text{M} + \text{H}]^+$ : 299. 2006; found: 299.2009.

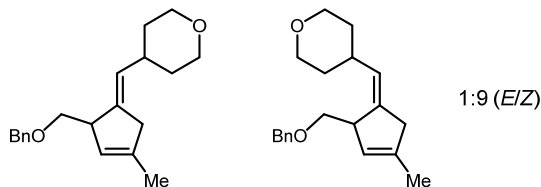

**4-((2-((benzyloxy)methyl)-4-methylcyclopent-3-en-1-ylidene)methyl)tetrahydro-2H-pyran (35)**. According to General Procedure G: 4-(2,2-dichlorovinyl)tetrahydro-2H-pyran (36.2 mg, 0.20 mmol, 1.0 equiv); (**Z**)-(((4-methylpenta-2,4-dien-1-yl)oxy)methyl)benzene (75.2 mg, 0.40 mmol, 2.0 equiv); [ $i$ -PrNDI] $\text{Ni}_2(\text{C}_6\text{H}_6)$  **3** (14.6 mg, 10 mol%); rt for 24 h in  $\text{Et}_2\text{O}/\text{NMP}$  (1.60 mL/0.20 mL). The product was isolated as a colorless oil following purification by column chromatography ( $\text{SiO}_2$ , 1:19  $\text{Et}_2\text{O}/\text{pentane}$ ). 44.2 mg, 74% yield ( $E/Z = 9/1$ ).

$^1\text{H}$  NMR (800 MHz,  $\text{CDCl}_3$ )  $\delta$  7.36 – 7.33 (m, 4H, **E/Z**), 7.30 – 7.27 (m, 1H, **E/Z**), 5.50 – 5.48 (m, 1H, **Z**), 5.48 (hept,  $J = 1.7$  Hz, 1H, **E**), 5.22 (dq,  $J = 8.9, 2.3$  Hz, 1H, **E**), 5.15 (dd,  $J = 9.9, 2.1$  Hz, 1H, **Z**), 4.53 (d,  $J = 2.6$  Hz, 2H, **E**), 4.50 (d,  $J = 11.2$  Hz, 2H, **Z**), 3.95 (ddt,  $J = 11.7, 3.8, 1.5$  Hz, 2H, **E**), 3.90 (ddd,  $J = 11.4, 4.7, 1.9$  Hz, 1H, **Z**), 3.82 (ddd,  $J = 11.5, 4.5, 2.2$  Hz, 1H, **Z**), 3.55 (ddt,  $J = 6.0, 3.8, 1.9$  Hz, 1H, **Z**), 3.48 – 3.40 (m, 4H, **E**), 3.36 (td,  $J = 11.7, 2.3$  Hz, 1H, **Z**), 3.33 (dd,  $J = 8.5, 7.5$  Hz, 1H, **E**), 3.28 (dd,  $J = 8.9, 8.0$  Hz, 1H, **Z**), 3.21 (td,  $J = 11.5, 2.8$  Hz, 1H, **Z**), 3.09 – 3.04 (m, 1H, **Z**), 3.01 – 2.90 (m, 2H, **E**), 2.79 – 2.76 (m, 1H, **Z**), 2.37 (dtd,  $J = 15.0, 10.8, 4.2$  Hz, 1H, **Z**), 2.28 (dddd,  $J = 15.3, 11.2, 8.5, 4.1$  Hz, 1H, **E**), 1.77 (p,  $J = 1.2$  Hz, 3H, **E**), 1.75 (p,  $J = 1.4$  Hz, 3H, **Z**), 1.58 – 1.51 (m, 2H, **E**), 1.49 (ddd,  $J = 9.2, 4.7, 2.1$  Hz, 1H, **Z**), 1.47 – 1.41 (m, 2H, **E**), 1.40 – 1.32 (m, 3H, **Z**).

$^{13}\text{C}\{^1\text{H}\}$  NMR (201 MHz,  $\text{CDCl}_3$ )  $\delta$  140.72(**Z**), 140.62(**E**), 139.68(**Z**), 139.65(**E**), 138.85(**E**), 138.61(**Z**), 128.73(**Z**), 128.47(**E**), 127.80(**Z**), 127.70(**Z**), 127.66(**E**), 127.58(**E**), 127.42(**E**), 126.28(**E**), 126.07(**Z**), 75.35(**E**), 74.15(**Z**), 73.22(**E**), 67.95(**E**), 67.81(**Z**), 67.67(**Z**), 50.57(**E**), 48.13(**Z**), 43.05(**Z**), 40.00(**E**), 36.22(**E**), 35.41(**Z**), 33.40(**Z**), 33.06(**Z**), 32.73(**E**), 32.55(**E**), 17.00(**E**), 16.98(**Z**).

HRMS (ESI): calcd for  $\text{C}_{20}\text{H}_{27}\text{O}_2^+$   $[\text{M} + \text{H}]^+$ : 299. 2006; found: 299.2010.

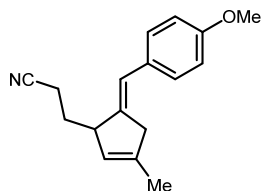

**(E)-3-(5-(4-methoxybenzylidene)-3-methylcyclopent-2-en-1-yl)propanenitrile (36).**

According to General Procedure G: 1-(2,2-dichlorovinyl)-4-methoxybenzene (40.6 mg, 0.20 mmol, 1.0 equiv); (*Z*)-6-methylhepta-4,6-dienenitrile (48.5 mg, 0.40 mmol, 2.0 equiv); [<sup>*i*</sup>-Pr<sup>N</sup>NDI]Ni<sub>2</sub>(C<sub>6</sub>H<sub>6</sub>) **3** (14.6 mg, 10 mol%); rt for 24 h in Et<sub>2</sub>O/NMP (0.80 mL/0.10 mL). The product was isolated as a colorless oil following purification by column chromatography (SiO<sub>2</sub>, 1:4 CH<sub>2</sub>Cl<sub>2</sub>/hexanes). 30.8 mg, 61% yield (*E/Z* = 13/1).

<sup>1</sup>H NMR (400 MHz, CDCl<sub>3</sub>) δ 7.29 – 7.23 (m, 2H), 6.92 – 6.87 (m, 2H), 6.29 (q, *J* = 2.4 Hz, 1H), 5.37 (p, *J* = 1.9 Hz, 1H), 3.82 (s, 3H), 3.56 – 3.45 (m, 1H), 3.28 – 3.15 (m, 2H), 2.40 – 2.24 (m, 2H), 2.03 – 1.86 (m, 2H), 1.83 – 1.81 (m, 3H).

<sup>13</sup>C{<sup>1</sup>H} NMR (101 MHz, CDCl<sub>3</sub>) δ 158.28, 142.43, 141.13, 130.53, 129.47, 125.17, 122.92, 120.38, 113.94, 55.42, 50.79, 42.37, 31.27, 16.91, 13.77.

HRMS (APCI): calcd for C<sub>17</sub>H<sub>20</sub>NO<sup>+</sup> [*M* + *H*]<sup>+</sup>: 254.1545; found: 254.1547.

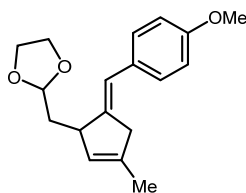

**(E)-2-((5-(4-methoxybenzylidene)-3-methylcyclopent-2-en-1-yl)methyl)-1,3-dioxolane (37).** According to General Procedure G: 1-(2,2-dichlorovinyl)-4-methoxybenzene (40.6 mg, 0.20 mmol, 1.0 equiv); (*Z*)-2-(4-methylpenta-2,4-dien-1-yl)-1,3-dioxolane (61.6 mg, 0.40 mmol, 2.0 equiv); [<sup>*i*</sup>-Pr<sup>N</sup>NDI]Ni<sub>2</sub>(C<sub>6</sub>H<sub>6</sub>) **3** (14.6 mg, 10 mol%); rt for 24 h in Et<sub>2</sub>O/NMP (0.80 mL/0.10 mL). The product was isolated as a colorless oil following purification by column chromatography (SiO<sub>2</sub>, 1:9 Et<sub>2</sub>O/hexanes). 34.3 mg, 60% yield (*E/Z* = 16/1).

<sup>1</sup>H NMR (400 MHz, CDCl<sub>3</sub>) δ 7.28 – 7.22 (m, 2H), 6.87 (dd, *J* = 9.3, 2.6 Hz, 2H), 6.32 (q, *J* = 2.4 Hz, 1H), 5.54 (p, *J* = 1.8 Hz, 1H), 4.99 (t, *J* = 5.0 Hz, 1H), 4.04 – 3.96 (m, 2H), 3.91 – 3.84 (m, 2H), 3.81 (s, 3H), 3.49 (ddd, *J* = 9.6, 5.1, 2.2 Hz, 1H), 3.32 – 3.11 (m, 2H), 1.99 (dt, *J* = 13.8, 5.1 Hz, 1H), 1.80 – 1.78 (m, 3H), 1.78 – 1.73 (m, 1H).

<sup>13</sup>C{<sup>1</sup>H} NMR (101 MHz, CDCl<sub>3</sub>) δ 157.97, 144.94, 138.79, 131.15, 129.39, 127.26, 122.07, 113.82, 103.85, 65.04, 64.90, 55.40, 48.19, 41.91, 40.85, 16.95.

HRMS (ESI): calcd for C<sub>18</sub>H<sub>21</sub>O<sub>3</sub><sup>+</sup> [*M* – *H*]<sup>+</sup>: 285.1485; found: 285.1491.

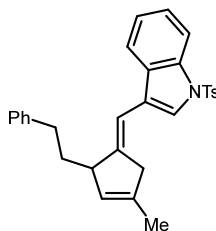

**(E)-3-((4-methyl-2-phenethylcyclopent-3-en-1-ylidene)methyl)-1-tosyl-1H-indole (38).**

According to General Procedure G: 3-(2,2-dichlorovinyl)-1-tosyl-1H-indole (73.0 mg, 0.20 mmol, 1.0 equiv); (Z)-(5-methylhexa-3,5-dien-1-yl)benzene (68.8 mg, 0.40 mmol, 2.0 equiv); [*i*-Pr<sup>r</sup>NDI]Ni<sub>2</sub>(C<sub>6</sub>H<sub>6</sub>) **3** (14.6 mg, 10 mol%); rt for 24 h in THF/NMP (1.60 mL/0.20 mL). The product was isolated as a pale yellow solid following purification by column chromatography (SiO<sub>2</sub>, 1:4 DCM/hexane). 68.9 mg, 74% yield (*E/Z* = 16/1).

<sup>1</sup>H NMR (400 MHz, CDCl<sub>3</sub>) δ 7.99 (d, *J* = 8.2 Hz, 1H), 7.78 (d, *J* = 8.3 Hz, 2H), 7.59 (d, *J* = 7.8 Hz, 1H), 7.46 (s, 1H), 7.36 – 7.14 (m, 9H), 6.46 (q, *J* = 2.5 Hz, 1H), 5.55 (p, *J* = 1.8 Hz, 1H), 3.47 (tt, *J* = 5.3, 2.6 Hz, 1H), 3.28 – 3.11 (m, 2H), 2.76 – 2.61 (m, 2H), 2.33 (s, 3H), 2.07 – 1.95 (m, 1H), 1.89 (s, 3H), 1.82 (dddd, *J* = 13.6, 10.3, 6.0, 3.9 Hz, 1H).

<sup>13</sup>C{<sup>1</sup>H} NMR (101 MHz, CDCl<sub>3</sub>) δ 149.42, 144.99, 142.82, 138.81, 135.35, 134.73, 130.79, 129.99, 128.54, 128.47, 127.35, 126.89, 125.83, 125.02, 123.31, 122.35, 120.46, 119.46, 113.75, 110.42, 51.31, 43.80, 38.19, 33.18, 21.70, 17.05.

HRMS (ESI): calcd for C<sub>30</sub>H<sub>30</sub>NO<sub>2</sub>S<sup>+</sup> [M + H]<sup>+</sup>: 468.1992; found: 468.1982.

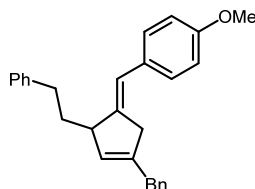

**(E)-1-((4-benzyl-2-phenethylcyclopent-3-en-1-ylidene)methyl)-4-methoxybenzene (39).**

According to General Procedure G: 1-(2,2-dichlorovinyl)-4-methoxybenzene (40.6 mg, 0.20 mmol, 1.0 equiv); (Z)-(2-methylenehex-3-ene-1,6-diyl)dibenzene (99.2 mg, 0.40 mmol, 2.0 equiv); [*i*-Pr<sup>r</sup>NDI]Ni<sub>2</sub>(C<sub>6</sub>H<sub>6</sub>) **3** (7.3 mg, 5 mol%); rt for 24 h in Et<sub>2</sub>O/NMP (1.60 mL/0.20 mL). The product was isolated as a colorless oil following purification by column chromatography (SiO<sub>2</sub>, 1:4 DCM/hexanes). 65.7 mg, 86% yield (*E/Z* = 25/1).

<sup>1</sup>H NMR (400 MHz, CDCl<sub>3</sub>) δ 7.33 – 7.27 (m, *J* = 9.6, 6.5, 5.7, 2.8 Hz, 4H), 7.24 – 7.14 (m, 8H), 6.89 – 6.83 (m, 2H), 6.31 (q, *J* = 2.4 Hz, 1H), 5.55 (h, *J* = 1.7 Hz, 1H), 3.80 (s, 3H), 3.49 (s, 2H), 3.47 – 3.39 (m, 1H), 3.34 – 3.09 (m, 2H), 2.66 (ddd, *J* = 9.6, 6.4, 3.1 Hz, 2H), 1.97 (dddd, *J* = 13.3, 9.7, 6.8, 5.0 Hz, 1H), 1.88 – 1.77 (m, 1H).

<sup>13</sup>C{<sup>1</sup>H} NMR (101 MHz, CDCl<sub>3</sub>) δ 157.95, 144.57, 142.99, 142.32, 139.52, 131.14, 129.35, 128.94, 128.55, 128.54, 128.45, 128.41, 126.25, 125.78, 122.04, 113.85, 55.41, 51.73, 40.37, 38.24, 38.15, 32.97.

HRMS (ESI): calcd for C<sub>28</sub>H<sub>29</sub>O<sup>+</sup> [M + H]<sup>+</sup>: 381.2213; found: 381.2218.

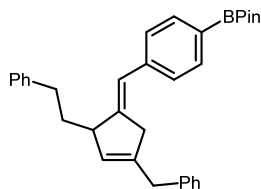

**(E)-2-(4-((4-benzyl-2-phenethylcyclopent-3-en-1-ylidene)methyl)phenyl)-4,4,5,5-tetramethyl-1,3,2-dioxaborolane (40).** According to General Procedure G: 2-(4-(2,2-dichlorovinyl)phenyl)-4,4,5,5-tetramethyl-1,3,2-dioxaborolane (59.8 mg, 0.20 mmol, 1.0 equiv); (Z)-(2-methylenehex-3-ene-1,6-diyl)dibenzene (99.2 mg, 0.40 mmol, 2.0 equiv); [*i*-Pr<sup>NDI</sup>]Ni<sub>2</sub>(C<sub>6</sub>H<sub>6</sub>) **3** (7.3 mg, 5 mol%); rt for 24 h in Et<sub>2</sub>O/NMP (1.60 mL/0.20 mL). The product was isolated as a colorless oil following purification by column chromatography (SiO<sub>2</sub>, 1:3 CH<sub>2</sub>Cl<sub>2</sub>/hexanes to 1:10:30 Et<sub>2</sub>O/CH<sub>2</sub>Cl<sub>2</sub>/hexanes). 71.7 mg, 75% yield (*E/Z* = 32/1).

<sup>1</sup>H NMR (800 MHz, CDCl<sub>3</sub>) δ 7.76 – 7.74 (m, 2H), 7.32 – 7.26 (m, 6H), 7.24 – 7.15 (m, 6H), 6.38 (q, *J* = 2.4 Hz, 1H), 5.54 (h, *J* = 1.7 Hz, 1H), 3.49 (s, 2H), 3.45 (tt, *J* = 4.4, 2.3 Hz, 1H), 3.29 (dt, *J* = 21.1, 2.4 Hz, 1H), 3.19 (dt, *J* = 21.1, 2.1 Hz, 1H), 2.70 – 2.62 (m, 2H), 2.01 – 1.94 (m, 1H), 1.84 (dddd, *J* = 13.4, 10.4, 7.7, 5.8 Hz, 1H), 1.34 (s, 12H).

<sup>13</sup>C {<sup>1</sup>H} NMR (201 MHz, CDCl<sub>3</sub>) δ 148.40, 142.86, 142.38, 141.03, 139.43, 134.89, 128.95, 128.57, 128.54, 128.47, 128.09, 127.53, 126.28, 125.82, 122.88, 83.82, 51.92, 40.57, 38.21, 38.05, 32.98, 25.03, 25.00.

HRMS (APCI): calcd for C<sub>33</sub>H<sub>38</sub>B<sup>10</sup>O<sub>2</sub><sup>+</sup> [M + H]<sup>+</sup>: 476.2996; found: 476.2991.

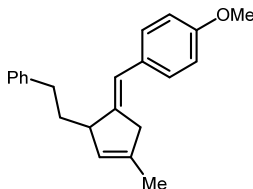

**(E)-1-methoxy-4-((4-methyl-2-phenethylcyclopent-3-en-1-ylidene)methyl)benzene(41).** According to General Procedure G: 1-(2,2-dichlorovinyl)-4-methoxybenzene (40.6 mg, 0.20 mmol, 1.0 equiv); (Z)-(5-methylhexa-3,5-dien-1-yl)benzene (**59**) (69.5 mg, 0.40 mmol, 2.0 equiv); [*i*-Pr<sup>NDI</sup>]Ni<sub>2</sub>(C<sub>6</sub>H<sub>6</sub>) **3** (7.3 mg, 5 mol%); rt for 24 h in Et<sub>2</sub>O/NMP (1.60 mL/0.20 mL). The product was isolated as a yellow oil following purification by column chromatography (SiO<sub>2</sub>, 1:4 DCM/hexanes). 65.7 mg, 86% yield (*E/Z* = 25/1).

**Gram Scale Reaction:** According to General Procedure G: 1-(2,2-dichlorovinyl)-4-methoxybenzene (1.015 g, 5.0 mmol, 1.0 equiv); (Z)-(5-methylhexa-3,5-dien-1-yl)benzene (**59**) (1.720 g, 10.0 mmol, 2.0 equiv); [*i*-Pr<sup>NDI</sup>]Ni<sub>2</sub>(C<sub>6</sub>H<sub>6</sub>) **3** (185.0 mg, 5 mol%); rt for 24 h in Et<sub>2</sub>O/NMP (40 mL/5 mL). The product (**41**) was isolated as a yellow oil following purification by column chromatography (SiO<sub>2</sub>, 1:4 DCM/hexanes). 1.010 g, 66% yield (*E/Z* = 21/1).

**Examples of 1,3-dienes that did not undergo [4 + 1]-cycloaddition:**

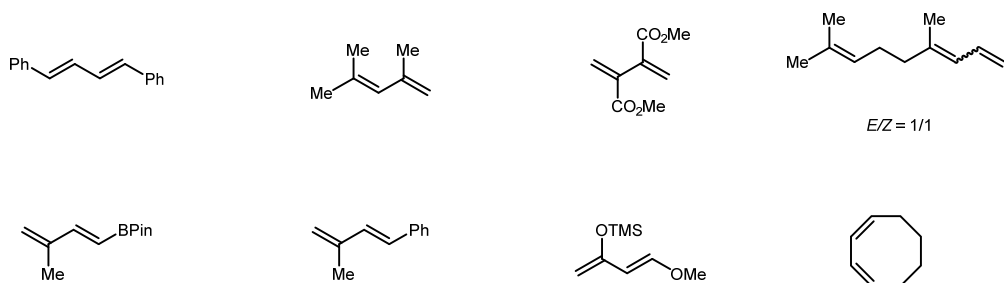

**Examples of 1,3-dienes that exhibited low yields and/or provided inseparable byproducts:**

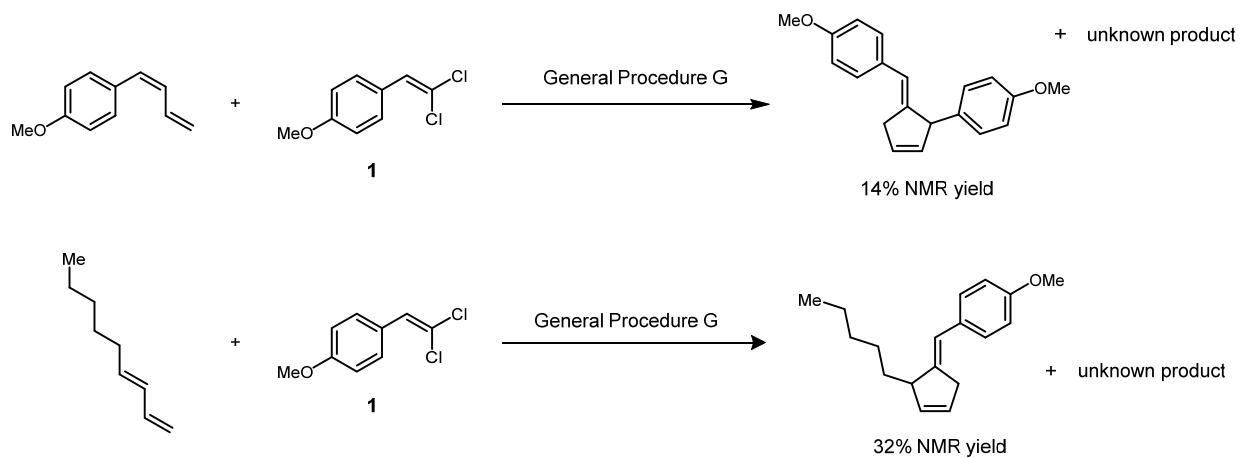

**Fig S4.** Limitations of the catalytic [4 + 1]-cycloaddition.



## 7. Synthetic Applications of the [4 + 1]-Cycloadditions Products

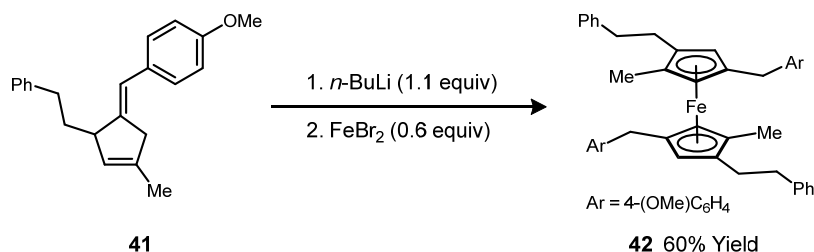

Under an N<sub>2</sub> atmosphere, a solution of **41** (20 mg, 0.066 mmol, 1.0 equiv) dissolved in THF (0.50 mL) was cooled to -30 °C. The solution was stirred, and *n*-BuLi (32 μL, 0.080 mmol, 2.5 M in hexane, 1.2 equiv) was added. The resulting reaction mixture was allowed to warm to room temperature. After 7 h, the reaction mixture was cooled to -30 °C, and FeBr<sub>2</sub> (8.5 mg, 0.040 mmol, 0.6 equiv) was added as a solution in THF (0.50 mL). The reaction mixture was stirred for 3 h at room temperature then 21 h at 65 °C. The solvent was removed under reduced pressure, and the product was isolated as an orange solid following purification by column chromatography (SiO<sub>2</sub>, 1:19 Et<sub>2</sub>O/hexane). 13.0 mg, 60% yield.

<sup>1</sup>H NMR (300 MHz, CDCl<sub>3</sub>) δ 7.28 - 7.23 (m, 4H), 7.20 - 7.14 (m, 4H), 7.09 - 7.06 (m, 8 H), 6.81 - 6.76 (m, 4 H), 3.764 (s, 3H), 3.764 (s, 3H), 3.71 (s, *br*, 2H), 3.67 (s, *br*, 2H), 3.57 (s, *br*, 4H), 2.59-2.43 (m, 8H), 1.93 (s, 6H).

<sup>13</sup>C {<sup>1</sup>H} NMR (201 MHz, CDCl<sub>3</sub>) δ 157.90, 142.52, 134.13, 129.32, 129.30, 128.49, 128.44, 125.93, 113.80, 86.07, 85.25, 82.09, 72.15, 71.14, 55.41, 37.79, 32.85, 29.90, 14.16.

HRMS (ESI): calcd for C<sub>44</sub>H<sub>46</sub>Fe<sup>54</sup>O<sub>2</sub><sup>+</sup> [M]<sup>+</sup>: 660.2888; found: 660.2881.

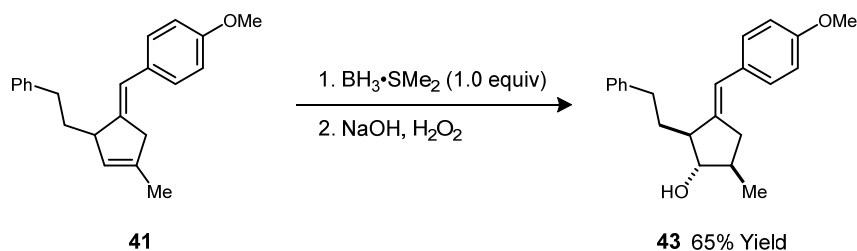

**3-((E)-4-Methoxybenzylidene)-5-methyl-2-phenethylcyclopent-1-ol (43)**. Under an N<sub>2</sub> atmosphere, BH<sub>3</sub>·Me<sub>2</sub>S (10 μL, 0.10 mmol) was added to a solution of **41** (31.0 mg, 0.10 mmol) in THF (1.0 mL) cooled to 0 °C. After 1 h, the mixture was cooled to -10 °C, and NaOH (60 μL, 10% aq) was added dropwise followed by H<sub>2</sub>O<sub>2</sub> (20 μL, 30% aq). After stirring for 15 min at -10 °C, the mixture was diluted with Et<sub>2</sub>O and washed with H<sub>2</sub>O. The organic phase was dried over MgSO<sub>4</sub> and filtered. The filtrate was concentrated under reduced pressure. The product was isolated as a white solid following purification by flash chromatography (SiO<sub>2</sub>, 1:4 EtOAc/hexane). 21.0 mg, 65% yield, dr = 18/1, E/Z = 7/1.

<sup>1</sup>H NMR (800 MHz, CDCl<sub>3</sub>) δ 7.31-7.29 (m, 2H, *E/Z*), 7.27 - 7.24 (m, 2H, *E/Z*), 7.23 - 7.21 (m, 2H, *E/Z*), 7.20 - 7.18 (m, 1H, *E/Z*), 6.89 - 6.85 (m, 2H, *E/Z*), 6.23 (q, *J* = 2.2 Hz, 1H, *Z*), 6.21 (q, *J* = 2.5 Hz, 1H, *E*), 3.81 (s, 3H, *E/Z*), 3.46 (td, *J* = 8.8, 5.6 Hz, 1H, *E/Z*), 2.92 - 2.83 (m, 1H, *E/Z*), 2.79 (ddd, *J* = 13.8, 10.9, 6.0 Hz, 1H, *E/Z*), 2.57 - 2.53 (m, 1H, *E/Z*), 2.18 - 2.08 (m, 1H, *E/Z*), 1.93 (dddd, *J* = 14.0, 10.9, 7.2, 5.3 Hz, 1H, *E/Z*), 1.88 - 1.82 (m, 1H, *E/Z*), 1.53 (d, *J* = 6.0 Hz, 1H, *E/Z*), 1.15 (d, *J* = 6.5 Hz, 3H, *E/Z*).

$^{13}\text{C}\{^1\text{H}\}$  NMR (201 MHz,  $\text{CDCl}_3$ )  $\delta$  157.99, 142.93, 142.26, 131.19, 129.52, 128.57, 128.55, 125.91, 121.59, 113.82, 83.54, 55.42, 52.65, 41.58, 37.52, 34.38, 32.95, 17.53.

HRMS (ESI): calcd for  $\text{C}_{22}\text{H}_{27}\text{O}_2^+$  [ $\text{M} + \text{H}$ ] $^+$ : 323.2006; found: 323.2002.

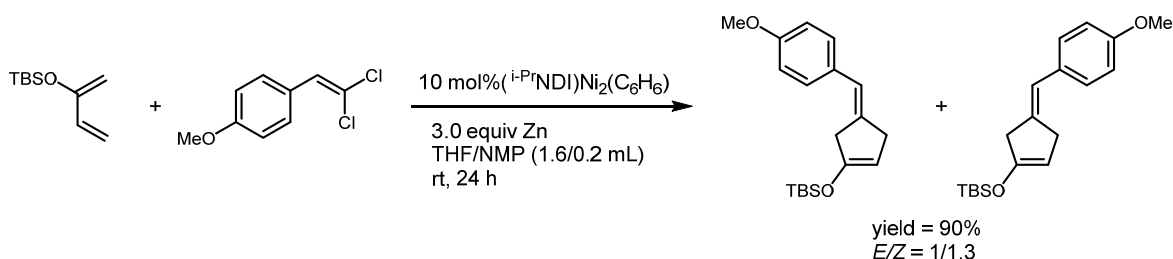

***tert*-Butyl((4-(4-methoxybenzylidene)cyclopent-1-en-1-yl)oxy)dimethylsilane.** According to General Procedure G: 1-(2,2-dichlorovinyl)-4-methoxybenzene (40.6 mg, 0.20 mmol, 1.0 equiv); (buta-1,3-dien-2-yloxy)(*tert*-butyl)dimethylsilane (74.0 mg, 0.40 mmol, 2.0 equiv); [ $^i\text{-Pr}$ NDI] $\text{Ni}_2(\text{C}_6\text{H}_6)$  **3** (14.6 mg, 10 mol%); rt for 24 h in THF/NMP (1.6 mL/0.20 mL). The product was isolated as a pale yellow oil following purification by column chromatography ( $\text{SiO}_2$ , 1:9  $\text{CH}_2\text{Cl}_2$ /hexanes). 57.0 mg, 90% yield ( $E/Z = 1/1.3$ )

$^1\text{H}$  NMR (800 MHz,  $\text{CDCl}_3$ )  $\delta$  7.24 – 7.21 (m, 2H,  $E/Z$ ), 6.90 – 6.86 (m, 2H,  $E/Z$ ), 6.30 (p,  $J = 2.5$  Hz, 1H,  $E$ ), 6.28 (p,  $J = 2.4$  Hz, 1H,  $Z$ ), 4.72 – 4.70 (m, 1H,  $E/Z$ ), 3.81 (s, 3H,  $Z$ ), 3.81 (s, 3H,  $E$ ), 3.27 (t,  $J = 2.5$  Hz, 2H,  $E$ ), 3.25 (t,  $J = 2.3$  Hz, 2H,  $Z$ ), 3.21 (m, 2H,  $E/Z$ ), 0.94 (s, 9H,  $E/Z$ ), 0.19 (s, 6H,  $Z$ ), 0.18 (s, 6H,  $E$ ).

$^{13}\text{C}\{^1\text{H}\}$  NMR (201 MHz,  $\text{CDCl}_3$ )  $\delta$  157.95, 157.91, 153.29, 153.25, 138.14, 137.61, 131.09, 131.03, 129.28, 129.14, 122.70, 122.39, 113.90, 113.84, 101.57, 100.63, 55.40, 42.22, 39.51, 38.25, 35.45, 25.83, 25.82, 18.29, 18.27, -4.39, -4.42.

HRMS (ESI): calcd for  $\text{C}_{20}\text{H}_{27}\text{O}_2^+$  [ $\text{M} + \text{H}$ ] $^+$ : 317.1931; found: 317.1927.

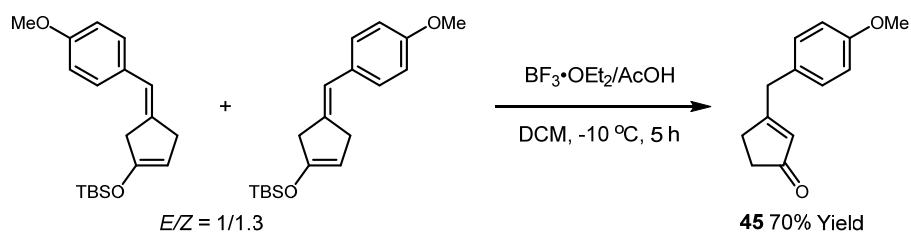

**3-(4-methoxybenzyl)cyclopent-2-en-1-one (45).** A 2-dram vial was charged with *tert*-butyl((4-(4-methoxybenzylidene)cyclopent-1-en-1-yl)oxy)dimethylsilane (16.0 mg, 0.05 mmol, 1.0 equiv) and  $\text{CH}_2\text{Cl}_2$  (2.0 mL). The solution was cooled to  $-10$  °C.  $\text{BF}_3 \cdot \text{Et}_2\text{O}$  (1  $\mu\text{L}$ , 0.005, 0.10 equiv) and AcOH (3  $\mu\text{L}$ , 0.05, 1.0 equiv) were added sequentially. The reaction mixture was stirred at  $-10$  °C. After 5 h, the reaction was allowed to warm to room temperature and quenched with saturated aq.  $\text{NaHCO}_3$ . The aqueous phase was extracted with  $\text{CH}_2\text{Cl}_2$  (2 x 20 mL). The combined organic phases were dried with  $\text{Na}_2\text{SO}_4$ , filtered, and the filtrate was concentrated under reduced pressure. The product was isolated as a colorless oil following purification by flash chromatography ( $\text{SiO}_2$ , 1:4 EtOAc/hexane). 71.0 mg, 70% yield.

$^1\text{H}$  NMR (800 MHz,  $\text{CDCl}_3$ )  $\delta$  7.10 – 7.09 (m, 2H), 6.88 – 6.84 (m, 2H), 5.89 (s, 1H), 3.80 (s, 3H), 3.66 (s, 2H), 2.57 – 2.53 (m, 2H), 2.42 – 2.38 (m, 2H).

$^{13}\text{C}\{^1\text{H}\}$  NMR (201 MHz,  $\text{CDCl}_3$ )  $\delta$  209.96, 181.65, 158.74, 130.61, 130.11, 129.03, 114.32, 55.45, 39.39, 35.70, 31.12.

HRMS (ESI): calcd for  $\text{C}_{13}\text{H}_{15}\text{O}_2^+$   $[\text{M} + \text{H}]^+$ : 203.1067; found: 203.1065.

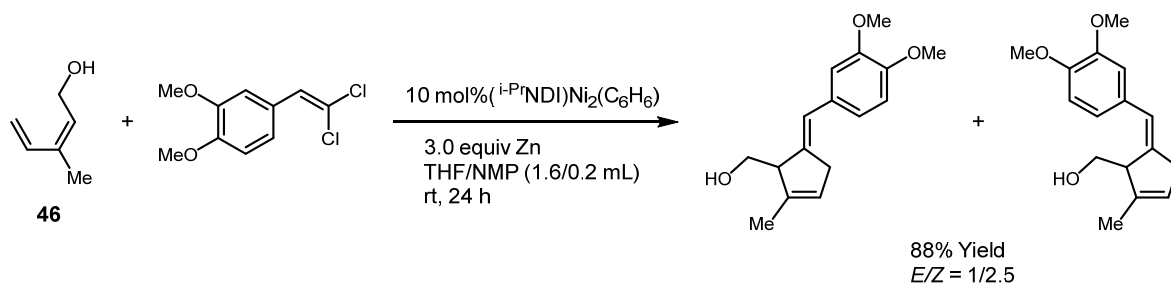

**(5-(3,4-dimethoxybenzylidene)-2-methylcyclopent-2-en-1-yl)methanol.** According to General Procedure G: 4-(2,2-dichlorovinyl)-1,2-dimethoxybenzene (46.6 mg, 0.20 mmol, 1.0 equiv); (Z)-3-methylpenta-2,4-dien-1-ol (40.0 mg, 0.40 mmol, 2.0 equiv); [ $i\text{-PrNDI}$ ] $\text{Ni}_2(\text{C}_6\text{H}_6)$  **3** (14.6 mg, 10 mol%); rt for 24 h in THF/NMP (1.6 mL/0.20 mL). The product was isolated as a pale yellow oil following purification by column chromatography ( $\text{SiO}_2$ , 3:7 EtOAc/hexanes). 46.0 mg, 88% yield ( $E/Z = 1/2.5$ ).

$^1\text{H}$  NMR (800 MHz,  $\text{CDCl}_3$ )  $\delta$  6.92 – 6.89 (m, 2H,  $E/Z$ ), 6.86 – 6.82 (m, 1H,  $E/Z$ ), 6.45 (q,  $J = 2.2$  Hz, 1H,  $Z$ ), 6.41 (q,  $J = 2.5$  Hz, 1H,  $E$ ), 5.63 (s, 1H,  $E/Z$ ), 3.895 (s, 3H,  $E$ ), 3.888 (s, 3H,  $E$ ), 3.881 (s, 3H,  $Z$ ), 3.877 (s, 3H,  $Z$ ), 3.79 – 3.61 (m, 3H,  $E/Z$ ), 3.34 – 3.10 (m, 3H,  $E/Z$ ), 1.81 (s, *br*, 3H,  $E/Z$ ).

$^{13}\text{C}\{^1\text{H}\}$  NMR (201 MHz,  $\text{CDCl}_3$ )  $\delta$  148.88 ( $Z$ ), 148.80 ( $E$ ), 147.81 ( $Z$ ), 142.88 ( $Z$ ), 142.51 ( $E$ ), 139.69 ( $Z$ ), 138.88 ( $E$ ), 130.96 ( $E$ ), 130.81 ( $Z$ ), 125.55 ( $Z$ ), 125.53 ( $E$ ), 123.88 ( $Z$ ), 123.16 ( $E$ ), 121.01 ( $E$ ), 120.55 ( $Z$ ), 111.71 ( $E$ ), 111.55 ( $Z$ ), 111.29 ( $Z$ ), 111.22 ( $E$ ), 64.00 ( $E$ ), 62.04 ( $Z$ ), 57.58 ( $E$ ), 56.05 ( $E$ ), 56.02 ( $Z$ ), 55.97 ( $E$ ), 53.13 ( $Z$ ), 41.09 ( $Z$ ), 37.82 ( $E$ ), 15.52 ( $Z$ ), 15.18 ( $E$ ).

HRMS (ESI): calcd for  $\text{C}_{16}\text{H}_{21}\text{O}_3^+$   $[\text{M} + \text{H}]^+$ : 261.1485; found: 261.1487.

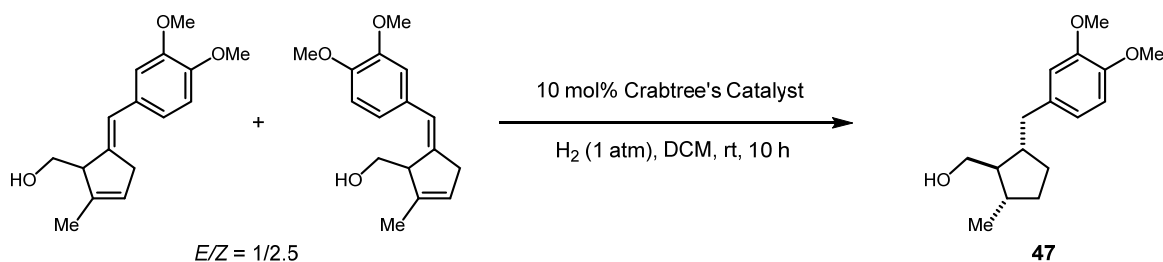

**2-(3,4-Dimethoxybenzyl)-5-methylcyclopentyl)methanol (47).** A 2-dram vial was charged with (5-(3,4-dimethoxybenzylidene)-2-methylcyclopent-2-en-1-yl)methanol (13.0 mg, 0.050 mmol,  $E/Z = 1/2.5$ ) and dry  $\text{CH}_2\text{Cl}_2$  (1.0 mL). After sealing with a rubber septum, the reaction vial was evacuated and back-filled with  $\text{H}_2$  three times. A solution of  $[\text{Ir}(\text{cod})(\text{PCy}_3)(\text{py})]\text{PF}_6$  (4.1 mg, 0.005, 0.10 equiv) dissolved in  $\text{CH}_2\text{Cl}_2$  (1.0 mL) was added, and the reaction was stirred under an  $\text{H}_2$  atmosphere (balloon pressure). After 10 h, the solution was filtered through celite, eluting with EtOAc (20 mL). The solvent was removed under reduced pressure, and the product was isolated as a pale yellow solid following purification by flash chromatography ( $\text{SiO}_2$ , 3:7 EtOAc/hexane). 12.1 mg, 92% yield,  $dr = 18/1$ .

$^1\text{H}$  NMR (800 MHz,  $\text{CD}_3\text{OD}$ )  $\delta$  6.86 (d,  $J = 8.1$  Hz, 1H), 6.83 (d,  $J = 2.0$  Hz, 1H), 6.75 (dd,  $J = 8.1, 2.0$  Hz, 1H), 3.84 (s, 3H), 3.82 (s, 3H), 3.55 – 3.50 (m, 2H), 2.82 (dd,  $J = 13.5, 5.6$  Hz, 1H), 2.43 (dd,  $J = 13.4, 9.4$  Hz, 1H), 2.06 – 1.99 (m, 1H), 1.85 – 1.80 (m, 1H), 1.75 (dtd,  $J = 12.3, 7.4, 5.9$  Hz, 1H), 1.61 (dq,  $J = 12.9, 7.5$  Hz, 1H), 1.40 (ddt,  $J = 12.8, 7.9, 6.1$  Hz, 1H), 1.28 (dt,  $J = 12.3, 7.7$  Hz, 1H), 1.24 (ddt,  $J = 10.7, 7.9, 4.0$  Hz, 1H), 1.06 (d,  $J = 6.7$  Hz, 3H).

$^{13}\text{C}\{^1\text{H}\}$  NMR (201 MHz,  $\text{CDCl}_3$ )  $\delta$  148.92, 147.33, 134.47, 120.89, 112.29, 111.23, 65.11, 56.00, 55.74, 44.30, 42.03, 37.39, 33.35, 31.02, 20.73.

HRMS (ESI): calcd for  $\text{C}_{16}\text{H}_{23}\text{O}_2^+$  [ $\text{M} - \text{H}_2\text{O}$ ] $^+$ : 247.1693; found: 247.1689.

## 8. Intramolecular [4 + 1]-Cycloadditions

**General Procedure H.** In an N<sub>2</sub>-filled glovebox, a 3-dram vial was charged with the [NDI] ligand (5–10 mol%), Ni(DME)Br<sub>2</sub> (10–20 mol%), Zn powder (0.60 mmol, 3.0 equiv), and a magnetic stir bar. The reaction solvent was added, and the resulting suspension was stirred for 15 min, during which time the catalyst solution turned purple. The substrate was added to the catalyst/reductant mixture. The vial was sealed, and the reaction mixture was stirred at room temperature. The reaction mixture was diluted with Et<sub>2</sub>O (40 mL) and washed with water (2 x 20 mL) and brine (20 mL). The organic phase was concentrated under reduced pressure, and the crude residue was purified by column chromatography.

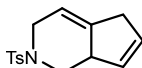

**2-tosyl-2,3,5,7a-tetrahydro-1H-cyclopenta[c]pyridine (49).** According to General Procedure H: (*E*)-*N*-(3,3-dichloroallyl)-4-methyl-*N*-(penta-2,4-dien-1-yl)benzenesulfonamide **48** (69.0 mg, 0.20 mmol, 1.0 equiv); **L4** (12.8 mg, 0.02 mmol, 10 mol%) and Ni(DME)Br<sub>2</sub> (12.4 mg, 0.04 mmol, 20 mol%); rt for 24 h in NMP (4.0 mL). The product was isolated as a white solid following purification by flash chromatography (SiO<sub>2</sub>, 1:19 EtOAc/hexane). 35.0 mg, 64% yield.

<sup>1</sup>H NMR (800 MHz, CDCl<sub>3</sub>) δ 7.70 – 7.67 (m, 2H), 7.32 – 7.29 (m, 2H), 5.87 (dq, *J* = 6.1, 2.3 Hz, 1H), 5.67 (ddtd, *J* = 6.1, 2.7, 1.8, 0.8 Hz, 1H), 5.37 (ddt, *J* = 5.4, 4.1, 2.0 Hz, 1H), 4.17 (dd, *J* = 10.7, 5.2 Hz, 1H), 4.10 – 4.05 (m, 1H), 3.35 (ddp, *J* = 10.7, 5.3, 2.6 Hz, 1H), 3.23 (dq, *J* = 16.4, 3.2, 1.4 Hz, 1H), 3.09 – 3.04 (m, 1H), 2.89 (dq, *J* = 19.2, 1.7 Hz, 1H), 2.42 (s, 3H), 2.05 (t, *J* = 10.7 Hz, 1H).

<sup>13</sup>C{<sup>1</sup>H} NMR (201 MHz, CDCl<sub>3</sub>) δ 143.52, 141.56, 134.09, 132.03, 130.37, 129.76, 127.63, 113.94, 46.92, 45.55, 44.80, 38.09, 21.65.

HRMS (ESI): calcd for C<sub>15</sub>H<sub>17</sub>NO<sub>2</sub>SNa<sup>+</sup> [M + Na]<sup>+</sup>: 298.0872; found: 298.0874.

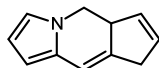

**5a,8-dihydro-5H-cyclopenta[f]indolizine (51).** According to General Procedure H: (*E*)-2-(2,2-dichlorovinyl)-1-(penta-2,4-dien-1-yl)-1H-pyrrole **50** (45.6 mg, 0.20 mmol, 1.0 equiv); **L4** (6.4 mg, 0.01 mmol, 5 mol%) and Ni(DME)Br<sub>2</sub> (6.2 mg, 0.02 mmol, 10 mol%); rt for 18 h in THF/NMP (3.60 mL/0.40 mL). The product was isolated as a pale yellow oil following purification by flash chromatography (SiO<sub>2</sub>, 1:4 CH<sub>2</sub>Cl<sub>2</sub>/pentane). 25.0 mg, 80% yield.

<sup>1</sup>H NMR (400 MHz, CDCl<sub>3</sub>) δ 6.57 (dd, *J* = 2.7, 1.6 Hz, 1H), 6.29 (tt, *J* = 2.7, 1.2 Hz, 1H), 6.11 (dd, *J* = 3.5, 2.7 Hz, 1H), 6.02 (dq, *J* = 6.0, 2.3 Hz, 1H), 5.98 (dd, *J* = 3.5, 1.5 Hz, 1H), 5.77 (dddd, *J* = 7.1, 2.9, 2.0, 1.0 Hz, 1H), 4.20 (dd, *J* = 11.4, 6.5 Hz, 1H), 3.74 (ddq, *J* = 13.9, 6.9, 2.4 Hz, 1H), 3.51 (dd, *J* = 14.0, 11.4 Hz, 1H), 3.20 (qq, *J* = 21.3, 2.2 Hz, 2H).

<sup>13</sup>C{<sup>1</sup>H} NMR (101 MHz, CDCl<sub>3</sub>) δ 137.99, 133.27, 130.56, 129.67, 120.73, 112.18, 107.93, 104.84, 49.31, 46.55, 37.01.

HRMS (ESI): calcd for C<sub>11</sub>H<sub>12</sub>N<sup>+</sup> [M + H]<sup>+</sup>: 158.0964; found: 158.0961.

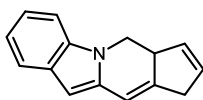

**3a,4-dihydro-1H-cyclopenta[4,5]pyrido[1,2-a]indole (53).** According to General Procedure H: (*E*)-2-(2,2-dichlorovinyl)-1-(penta-2,4-dien-1-yl)-1H-indole **52** (55.6 mg, 0.20 mmol, 1.0 equiv); **L4** (6.4 mg, 0.01 mmol, 5 mol%) and Ni(DME)Br<sub>2</sub> (6.2 mg, 0.02 mmol, 10 mol%); rt for 21 h in THF/NMP (3.60 mL/0.40 mL). The product was isolated as a white solid following purification by flash chromatography (SiO<sub>2</sub>, 1:4 CH<sub>2</sub>Cl<sub>2</sub>/pentane). 33.7 mg, 81% yield.

Single crystals for X-ray diffraction analysis were obtained from slow evaporation of solution of **53** hexane and THF (2:1).

<sup>1</sup>H NMR (400 MHz, CDCl<sub>3</sub>) δ 7.55 (dt, *J* = 7.9, 1.0 Hz, 1H), 7.30 – 7.23 (m, 1H), 7.17 (ddd, *J* = 8.2, 7.0, 1.2 Hz, 1H), 7.05 (ddd, *J* = 8.0, 7.0, 1.1 Hz, 1H), 6.47 (dp, *J* = 2.7, 1.2 Hz, 1H), 6.33 (s, 1H), 6.07 (dq, *J* = 6.0, 2.3 Hz, 1H), 5.91 – 5.85 (m, 1H), 4.60 (dd, *J* = 11.2, 6.8 Hz, 1H), 3.83 (ddq, *J* = 13.7, 7.0, 2.4 Hz, 1H), 3.46 (dd, *J* = 13.3, 11.2 Hz, 1H), 3.29 (qq, *J* = 21.4, 2.2 Hz, 2H).

<sup>13</sup>C{<sup>1</sup>H} NMR (101 MHz, CDCl<sub>3</sub>) δ 143.34, 136.85, 136.31, 132.92, 129.88, 129.24, 121.60, 120.66, 119.55, 112.44, 108.70, 98.48, 46.29, 45.16, 37.47.

HRMS (ESI): calcd for C<sub>15</sub>H<sub>14</sub>N<sup>+</sup> [M + H]<sup>+</sup>: 208.1121; found: 208.1123.

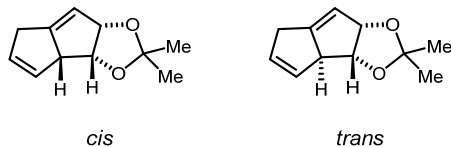

**(3aR,7aS)-2,2-dimethyl-3a,3b,6,7a-tetrahydropentaleno[1,2-d][1,3]dioxole (55).**

According to General Procedure H: (4*R*,5*S*)-4-(buta-1,3-dien-1-yl)-5-(2,2-dichlorovinyl)-2,2-dimethyl-1,3-dioxolane **54** (49.8 mg, 0.20 mmol, 1.0 equiv, *E/Z* = 5/1); **L4** (12.8 mg, 0.02 mmol, 10 mol%) and Ni(DME)Br<sub>2</sub> (12.4 mg, 0.04 mmol, 20 mol%); rt for 24 h in NMP (4.0 mL). The product was isolated as a colorless oil following purification by flash chromatography (SiO<sub>2</sub>, 1:20 Et<sub>2</sub>O/pentane). 16.1 mg, 45% yield (*trans/cis* = 1.3/1).

<sup>1</sup>H NMR (400 MHz, CDCl<sub>3</sub>) δ 6.04 – 5.99 (m, 1H, *trans*), 5.98 – 5.96 (m, 1H, *cis*), 5.93 (dq, *J* = 6.1, 2.1 Hz, 1H, *cis*), 5.83 (dq, *J* = 6.3, 2.3 Hz, 1H, *trans*), 5.56 (tdt, *J* = 2.9, 2.0, 1.1 Hz, 1H, *trans*), 5.40 (s, 1H, *cis*), 5.34 – 5.32 (m, 1H, *cis*), 5.16 – 5.08 (m, 1H, *trans*), 4.77 (t, *J* = 4.6 Hz, 1H, *cis*), 4.59 (dd, *J* = 6.3, 4.1 Hz, 1H, *trans*), 3.79 – 3.76 (m, 1H, *trans*), 3.57 (d, *J* = 4.7 Hz, 1H, *cis*), 2.86 – 2.83 (m, 2H, *trans*), 1.56 (s, 3H, *trans*), 1.36 (s, 2H, *trans*), 1.34 (s, 3H, *cis*), 1.30 (s, 3H, *cis*).

*trans* isomer: <sup>13</sup>C{<sup>1</sup>H} NMR (101 MHz, CDCl<sub>3</sub>) δ 158.38, 133.05, 132.55, 117.48, 113.76, 87.23, 84.72, 62.19, 32.93, 27.79, 25.76.

HRMS (ESI): calcd for C<sub>11</sub>H<sub>15</sub>O<sub>2</sub><sup>+</sup> [M + H]<sup>+</sup>: 179.1067; found: 179.1063.

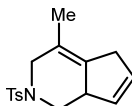

**4-methyl-2-tosyl-2,3,5,7a-tetrahydro-1H-cyclopenta[*c*]pyridine (57).** According to General Procedure H: (*E*)-*N*-(3,3-dichloro-2-methylallyl)-4-methyl-*N*-(penta-2,4-dien-1-yl)benzenesulfonamide **56** (72.0 mg, 0.20 mmol, 1.0 equiv); **L4** (12.8 mg, 0.02 mmol, 10 mol%) and Ni(DME)Br<sub>2</sub> (12.4 mg, 0.04 mmol, 20 mol%); rt for 24 h in NMP (4.0 mL). The product was isolated as an off-white solid following purification by flash chromatography (SiO<sub>2</sub>, 1:19 EtOAc/hexane). 7.0 mg, 12% yield.

<sup>1</sup>H NMR (400 MHz, CDCl<sub>3</sub>) δ 7.72 – 7.66 (m, 2H), 7.33 – 7.29 (m, 2H), 5.87 (dq, *J* = 6.1, 2.3 Hz, 1H), 5.68 (dq, *J* = 6.1, 2.0 Hz, 1H), 4.14 (dd, *J* = 10.5, 5.0 Hz, 1H), 4.00 – 3.91 (m, 1H), 3.32 (dt, *J* = 8.0, 2.4 Hz, 1H), 3.09 – 2.99 (m, 1H), 2.98 – 2.86 (m, 2H), 2.42 (s, 3H), 2.04 (t, *J* = 10.7 Hz, 1H), 1.58 (tq, *J* = 1.9, 0.9 Hz, 3H).

<sup>13</sup>C{<sup>1</sup>H} NMR (101 MHz, CDCl<sub>3</sub>) δ 143.48, 134.25, 134.04, 131.72, 130.56, 129.76, 127.66, 120.07, 48.48, 46.99, 45.66, 35.78, 21.65, 16.66.

HRMS (APCI): calcd for C<sub>16</sub>H<sub>20</sub>NO<sub>2</sub>S<sup>+</sup> [M + H]<sup>+</sup>: 290.1209; found: 290.1211.

## 9. Catalytic Asymmetric [4 + 1]-Cycloadditions

**General Procedure I.** In an N<sub>2</sub>-filled glovebox, a 3-dram vial was charged with the (*S,S*)-**L10** ligand (5–10 mol%), Ni(DME)Br<sub>2</sub> (10–20 mol%), Zn powder (0.60 mmol, 3.0 equiv), and a magnetic stir bar. The reaction solvent was added, and the resulting suspension was stirred for 15 min, during which time the catalyst solution turned purple. The substrate (0.20 mmol, 1.0 equiv) was added to the catalyst/reductant mixture. The vial was sealed, and the reaction mixture was stirred at room temperature. The reaction mixture was diluted with Et<sub>2</sub>O (40 mL) and washed with water (2 x 20 mL) and brine (20 mL). The organic phase was concentrated under reduced pressure, and the crude residue was purified by column chromatography.



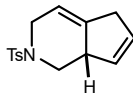

**(*S*)-2-tosyl-2,3,5,7a-tetrahydro-1H-cyclopenta[*c*]pyridine (49).** According to General Procedure I: (*E*)-*N*-(3,3-dichloroallyl)-4-methyl-*N*-(penta-2,4-dien-1-yl)benzenesulfonamide **48** (69.0 mg, 0.20 mmol, 1.0 equiv); (*S,S*)-**L10** (8.8 mg, 0.02 mmol, 10 mol%) and Ni(DME)Br<sub>2</sub> (12.4 mg, 0.04 mmol, 20 mol%); rt for 17 h in NMP (4.0 mL). The product was isolated as a white solid following purification by column chromatography (SiO<sub>2</sub>, 1:19 EtOAc/hexane). 34.8 mg, 65% yield.  $[\alpha]_D^{23} = -47.3^\circ$  (c 1.052, CHCl<sub>3</sub>).

Spectroscopic and mass spectrometry data were identical to those of the racemic product.

HPLC: Chiralpak® AD-H column (hexane/IPA = 90:10, 0.75 mL/min,  $\lambda = 254$  nm)  $t_r = 18.69$  min (minor), 20.21 min (major): 5:95 er.

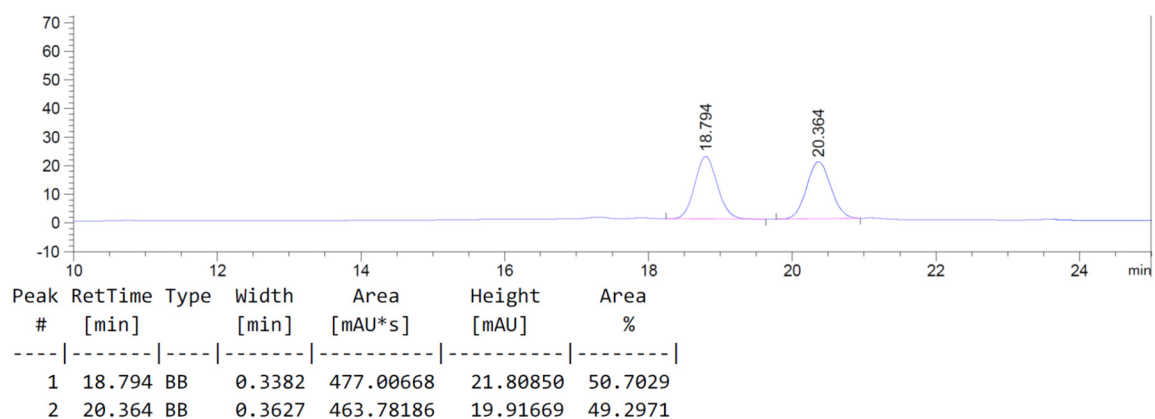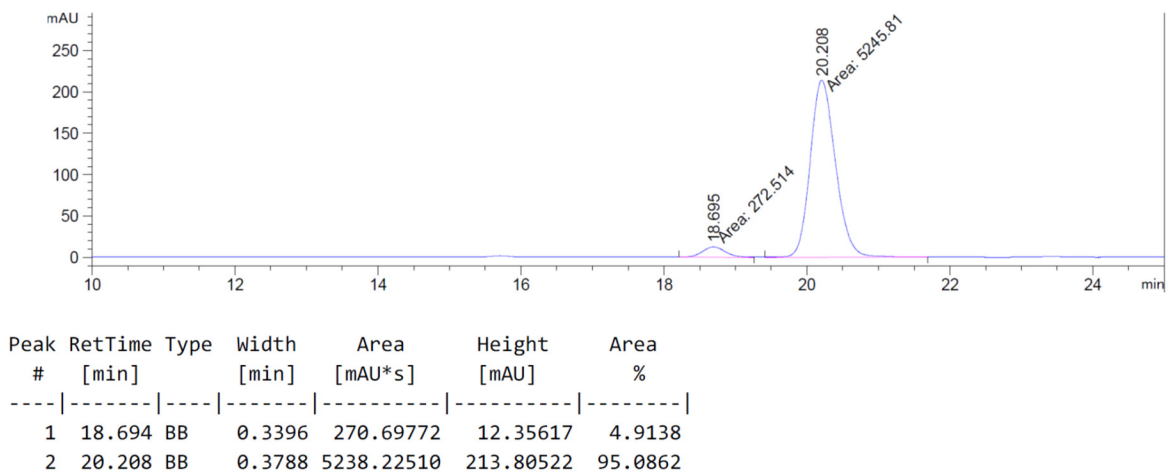

**Fig. S5.** HPLC data for the asymmetric [4 + 1]-cycloaddition of **48** (racemate, top; enantioselective reaction, bottom).

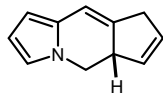

**(S)-5a,8-dihydro-5H-cyclopenta[f]indolizine (51).** According to General Procedure I: (*E*)-2-(2,2-dichlorovinyl)-1-(penta-2,4-dien-1-yl)-1H-pyrrole **50** (45.6 mg, 0.20 mmol, 1.0 equiv); (*S,S*)-**L10** (4.4 mg, 0.01 mmol, 5 mol%) and Ni(DME)Br<sub>2</sub> (6.2 mg, 0.02 mmol, 10 mol%); rt for 18 h in THF/NMP (3.60 mL/0.40 mL). The product was isolated as a pale-yellow oil following purification by column chromatography (SiO<sub>2</sub>, 1:4 CH<sub>2</sub>Cl<sub>2</sub> /pentane). 29.0 mg, 92% yield,  $[\alpha]_D^{23} = -158.0^\circ$  (c 0.694, CHCl<sub>3</sub>).

Spectroscopic and mass spectrometry data were identical to those of the racemic product.

HPLC: Chiralpak® OD-H column (hexane/IPA = 95:5, 0.75 mL/min,  $\lambda = 254$  nm)  $t_r = 6.52$  min (minor), 7.58 min (major): 7:93 er.

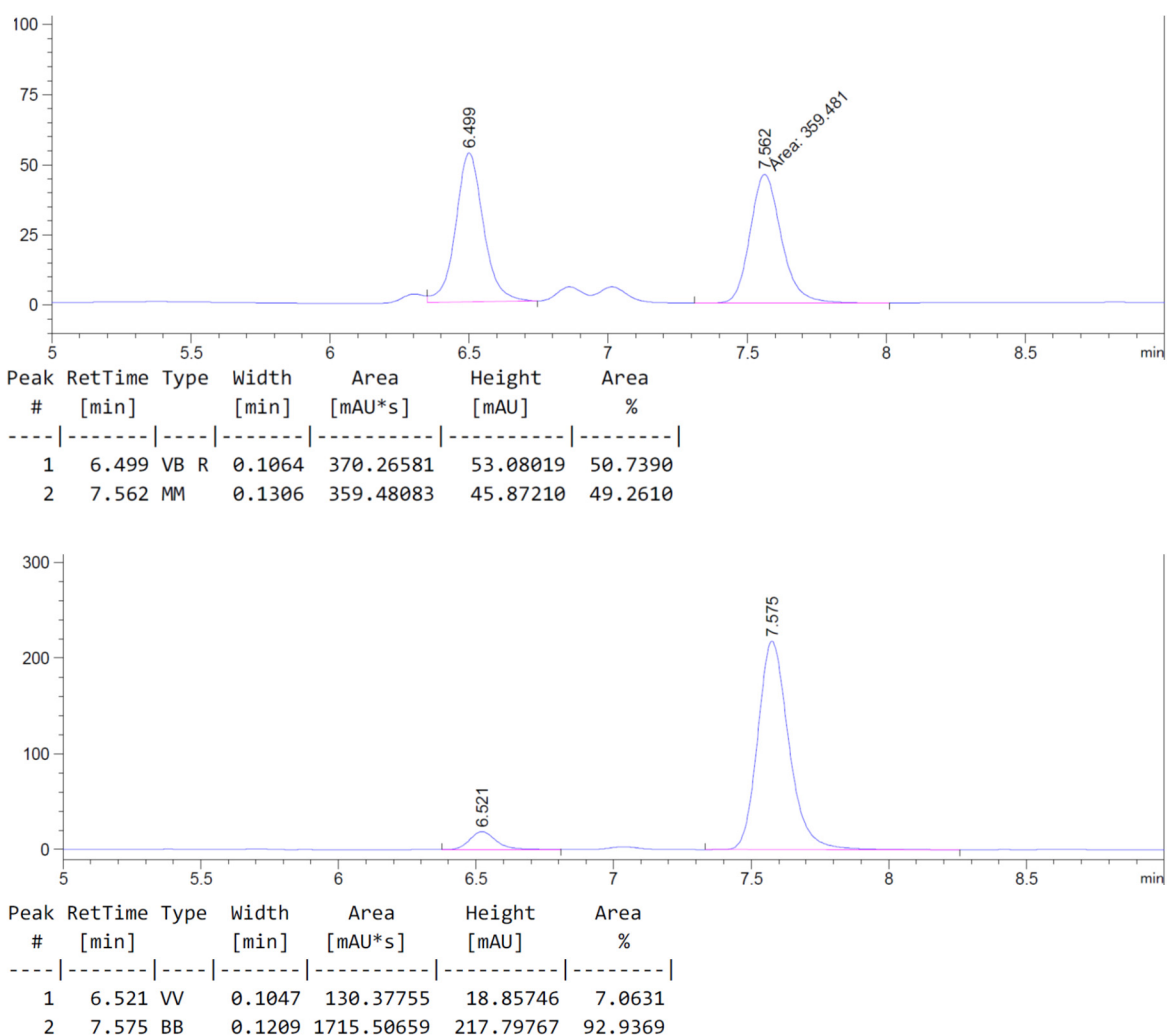

**Fig. S6.** HPLC data for the asymmetric [4 + 1]-cycloaddition of **50** (racemate, top; enantioselective reaction, bottom).

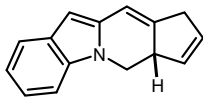

**(S)-3a,4-dihydro-1H-cyclopenta[4,5]pyrido[1,2-a]indole (53).** According to General Procedure I: (*E*)-2-(2,2-dichlorovinyl)-1-(penta-2,4-dien-1-yl)-1H-indole **52** (55.6 mg, 0.20 mmol, 1.0 equiv); (*S,S*)-**L10** (4.4 mg, 0.01 mmol, 5 mol%) and Ni(DME)Br<sub>2</sub> (6.2 mg, 0.02 mmol, 10 mol%); rt for 21 h in THF/NMP (3.60 mL/0.40 mL). The product was isolated as a white solid following purification by column chromatography (SiO<sub>2</sub>, 1:4 CH<sub>2</sub>Cl<sub>2</sub>/pentane). 38.0 mg, 91% yield,  $[\alpha]_D^{23} = -64.1^\circ$  (c 1.388, CHCl<sub>3</sub>).

Spectroscopic and mass spectrometry data were identical to those of the racemic product.

HPLC: Chiralpak<sup>®</sup> OD-H column (hexane/IPA = 95:5, 0.75 mL/min,  $\lambda = 254$  nm)  $t_r = 7.05$  min (minor), 8.29 min (major): 10:90 er.

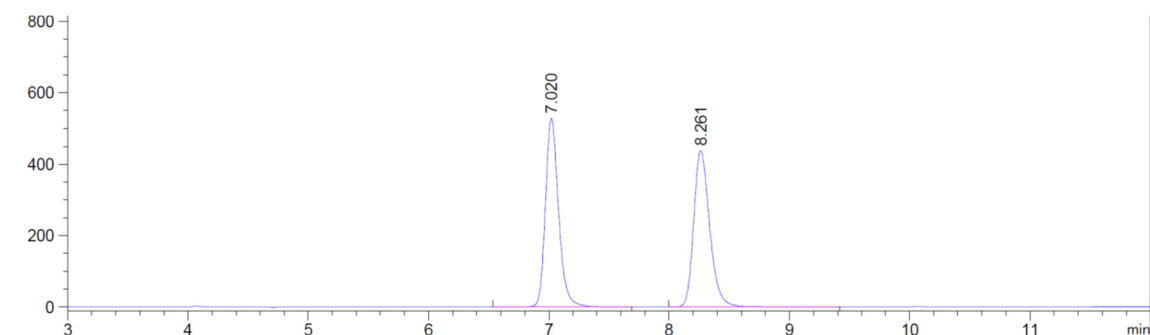

| Peak # | RetTime [min] | Type | Width [min] | Area [mAU*s] | Height [mAU] | Area %  |
|--------|---------------|------|-------------|--------------|--------------|---------|
| 1      | 7.020         | BB   | 0.1167      | 4018.88745   | 528.79926    | 49.8881 |
| 2      | 8.261         | BB   | 0.1405      | 4036.91235   | 438.19009    | 50.1119 |

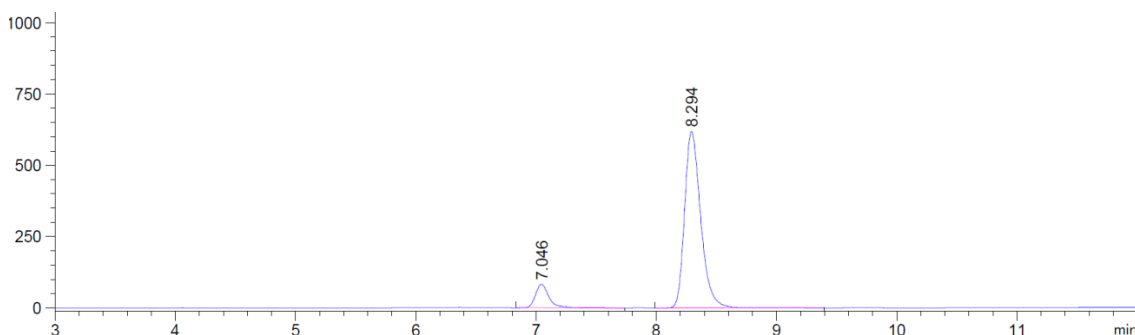

| Peak # | RetTime [min] | Type | Width [min] | Area [mAU*s] | Height [mAU] | Area %  |
|--------|---------------|------|-------------|--------------|--------------|---------|
| 1      | 7.046         | BV   | 0.1184      | 639.25708    | 82.51818     | 10.0254 |
| 2      | 8.294         | BB   | 0.1423      | 5737.09326   | 618.12408    | 89.9746 |

**Fig. S7.** HPLC data for the asymmetric [4 + 1]-cycloaddition of **52** (racemate, top; enantioselective reaction, bottom).

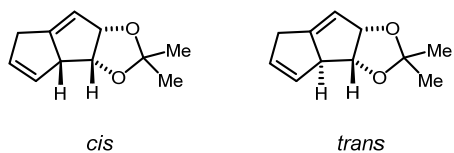

**(3aR,3bS,7aS)-2,2-dimethyl-3a,3b,6,7a-tetrahydropentaleno[1,2-d][1,3]dioxole (55).**

According to General Procedure I: (4*R*,5*S*)-4-(buta-1,3-dien-1-yl)-5-(2,2-dichlorovinyl)-2,2-dimethyl-1,3-dioxolane **54** (49.8 mg, 0.20 mmol, 1.0 equiv, *E/Z* = 5/1); (*S,S*)-**L10** (8.8 mg, 0.02 mmol, 10 mol%) and Ni(DME)Br<sub>2</sub> (12.4 mg, 0.04 mmol, 20 mol%); 50 °C for 24 h in NMP/THF (0.40/3.6 mL). The product was isolated as a colorless oil following purification by flash chromatography (SiO<sub>2</sub>, 1:20 Et<sub>2</sub>O/pentane). 17.1 mg, 48% yield (*trans/cis* = 18/1), [α]<sub>D</sub><sup>23</sup> = 65.6° (c 0.596, CHCl<sub>3</sub>).

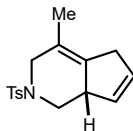

**(S)-4-methyl-2-tosyl-2,3,5,7a-tetrahydro-1H-cyclopenta[c]pyridine (57).** According to General Procedure I: (*E*)-*N*-(3,3-dichloro-2-methylallyl)-4-methyl-*N*-(penta-2,4-dien-1-yl)benzenesulfonamide **56** (72.0 mg, 0.20 mmol, 1.0 equiv); (*S,S*)-**L10** (8.8 mg, 0.02 mmol, 10 mol%) and Ni(DME)Br<sub>2</sub> (12.4 mg, 0.04 mmol, 20 mol%); rt for 12 h in NMP (4.0 mL). The product was isolated as an off-white solid following purification by column chromatography (SiO<sub>2</sub>, 1:19 EtOAc/hexane). 52.5 mg, 91% yield,  $[\alpha]_D^{23} = -23.2^\circ$  (c 1.148, CHCl<sub>3</sub>). Single crystals suitable for X-ray diffraction analysis were obtained from slow evaporation of a concentrated solution of **57** in hexane/Et<sub>2</sub>O (2:1).

Spectroscopic and mass spectrometry data were identical to those of the racemic product.

HPLC: Chiralpak<sup>®</sup> AD-H column (hexane/IPA = 90:10, 0.75 mL/min,  $\lambda = 254$  nm)  $t_r = 12.12$  min (major), 14.08 min (minor): 89:11 er.

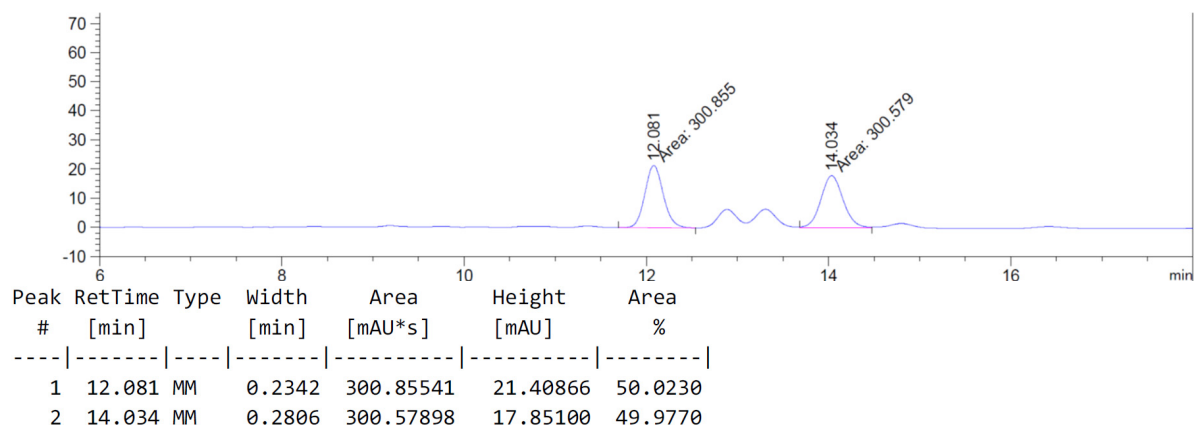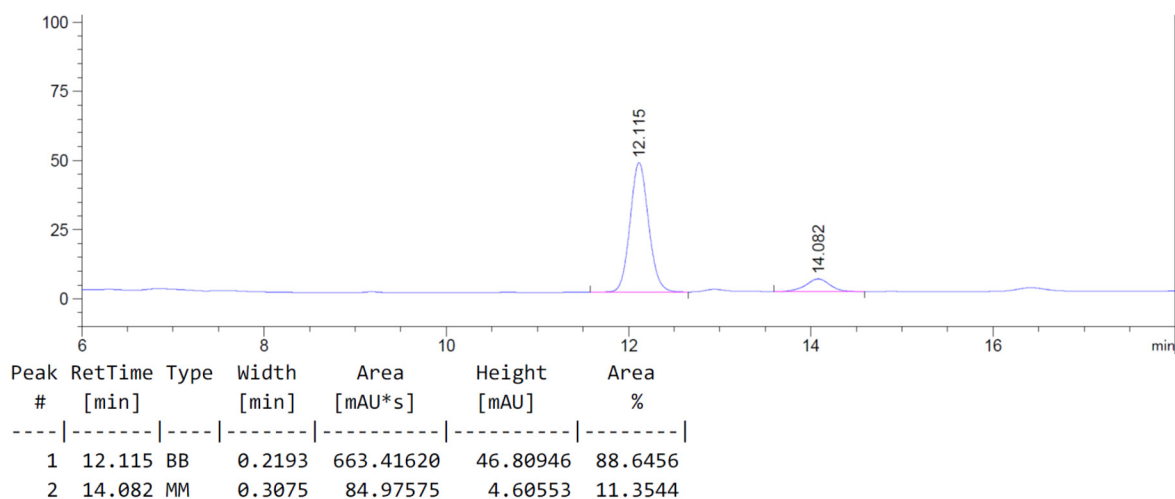

**Fig. S8.** HPLC data for the asymmetric [4 + 1]-cycloaddition of **56** (racemate, top; enantioselective reaction, bottom).

## 10. Mechanistic Studies

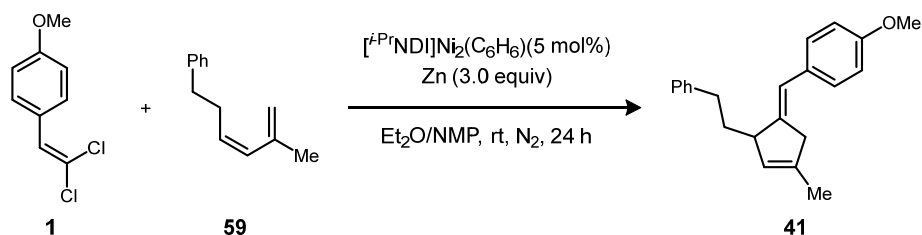

In an N<sub>2</sub>-filled glovebox, a 3-dram vial was charged with the [<sup>t</sup>-PrNDI]Ni<sub>2</sub>(C<sub>6</sub>H<sub>6</sub>) complex **3** (7.3 mg, 0.01 mmol, 5 mol%), Zn powder (39.2 mg, 0.60 mmol 3.0 equiv), Et<sub>2</sub>O (1.60 mL), NMP (0.20 mL), and a magnetic stir bar. (*Z*)-(5-methylhexa-3,5-dien-1-yl)benzene (**59**) (69.5 mg, 0.40 mmol, 2.0 equiv) and 1-(2,2-dichlorovinyl)-4-methoxybenzene (**1**) (40.6 mg, 0.20 mmol, 1.0 equiv) were successively added to the catalyst/reductant mixture. The vial was sealed, and the reaction mixture was stirred at room temperature. After 24 h, The reaction mixture was concentrated under reduced pressure, and the crude residue was purified by column chromatography (SiO<sub>2</sub>, 1:4 CH<sub>2</sub>Cl<sub>2</sub>/hexane). Colorless oil, 46.0 mg, 76% yield (*E/Z* = 25/1).

<sup>1</sup>H NMR (800 MHz, CDCl<sub>3</sub>) δ 7.30 – 7.26 (m, 4H), 7.22 – 7.19 (m, 2H), 7.18 (td, *J* = 7.3, 1.4 Hz, 1H), 6.92 – 6.88 (m, 2H), 6.31 (q, *J* = 2.4 Hz, 1H), 5.51 (hept, *J* = 1.7 Hz, 1H), 3.82 (s, 3H), 3.40 (ddq, *J* = 6.9, 4.3, 2.1 Hz, 1H), 3.31 – 3.27 (m, 1H), 3.19 (d, *J* = 20.9, 1H), 2.67 (dddd, *J* = 38.8, 13.7, 10.8, 5.6 Hz, 2H), 1.96 (dddd, *J* = 13.4, 11.0, 6.0, 4.9 Hz, 1H), 1.83 (s, 3H), 1.80 (dddd, *J* = 13.3, 10.8, 8.0, 5.3 Hz, 1H).

<sup>13</sup>C{<sup>1</sup>H} NMR (201 MHz, CDCl<sub>3</sub>) δ 157.93, 145.27, 143.07, 139.08, 131.32, 129.37, 128.55, 128.42, 127.09, 125.73, 121.68, 113.85, 55.42, 51.94, 42.48, 38.27, 33.08, 16.99.

HRMS (ESI): calcd for C<sub>22</sub>H<sub>23</sub>O<sup>+</sup> [*M* - H]<sup>+</sup>: 303.1749; found: 303.1746.

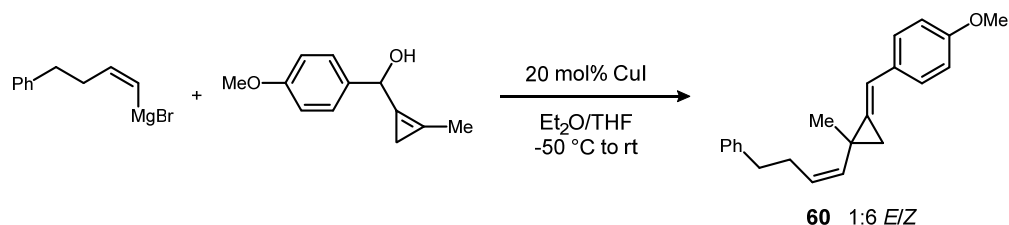

**1-methoxy-4-((2-methyl-2-((*Z*)-4-phenylbut-1-en-1-yl)cyclopropylidene)methyl)-benzene (60)** (**44**). Under an N<sub>2</sub> atmosphere, a round bottom flask was charged with (4-methoxyphenyl)(2-methylcycloprop-1-en-1-yl)methanol (0.40 g, 2.1 mmol, 1.0 equiv) and Et<sub>2</sub>O (50 mL). CuI (80.0 mg, 0.42, 0.2 equiv) was added as a solid, and the mixture was cooled to –50 °C. A solution of (*Z*)-(4-phenylbut-1-en-1-yl)magnesium bromide (**44**) freshly prepared from (*Z*)-(4-bromobut-3-en-1-yl)benzene (1.90 g, 9.0 mmol) and Mg (0.32 g, 13.5 mmol) in THF (20 mL) was added dropwise over 10 min. Following the addition, the reaction mixture was gradually warmed to room temperature, and stirring was continued overnight. The reaction was quenched with a saturated NH<sub>4</sub>Cl (aq) and stirred until the aqueous phase turned blue. The aqueous layer was extracted with Et<sub>2</sub>O (3 x 50 mL). The combined organic phases were wash with brine (20 mL), dried over MgSO<sub>4</sub>, and concentrated under reduced pressure. The crude product was purified by flash chromatography (SiO<sub>2</sub>, 1:9 to 1:4 CH<sub>2</sub>Cl<sub>2</sub>/hexane). Colorless oil, 0.48 g, 75% yield, *E/Z* = 5.7:1.0.

$^1\text{H}$  NMR (400 MHz,  $\text{CDCl}_3$ )  $\delta$  7.49 – 7.41 (m, 2H, *E*), 7.37 – 7.16 (m, 5H, *E/Z*), 7.12 – 7.07 (m, 2H, *Z*), 6.92 – 6.85 (m, 2H, *E/Z*), 6.75 (t,  $J = 2.4$  Hz, 1H, *E*), 6.62 (t,  $J = 2.0$  Hz, 1H, *Z*), 5.61 – 5.52 (m, 1H, *E/Z*), 5.47 – 5.36 (m, 1H, *E/Z*), 3.62 (s, 3H, *E/Z*), 2.72 – 2.65 (m, 2H, *E*), 2.65 – 2.56 (m, 2H, *E/Z*), 2.54 – 2.44 (m, 1H, *Z*), 1.42 (ddd,  $J = 21.8, 8.7, 2.6$  Hz, 2H, *E/Z*), 1.28 (s, 3H, *E/Z*).

$^{13}\text{C}\{^1\text{H}\}$  NMR (101 MHz,  $\text{CDCl}_3$ )  $\delta$  158.77(*E*), 142.19(*E*), 133.15(*E*), 132.82(*E*), 132.11(*Z*), 131.76(*E*), 131.18(*E*), 130.68(*Z*), 128.64(*E*), 128.57(*Z*), 128.45(*E*), 128.38(*Z*), 128.25(*Z*), 127.81(*E*), 125.97(*E*), 125.90(*Z*), 116.87(*E*), 114.15(*Z*), 114.04(*E*), 55.44(*Z*), 36.38(*Z*), 36.25(*E*), 35.78(*Z*), 30.21(*E*), 29.66(*Z*), 24.52(*E*), 23.86(*Z*), 19.89(*E*), 19.39(*Z*), 17.79(*E*).

HRMS (APCI): calcd for  $\text{C}_{22}\text{H}_{25}\text{O}^+$   $[\text{M} + \text{H}]^+$ : 305.1900; found: 305.1902.

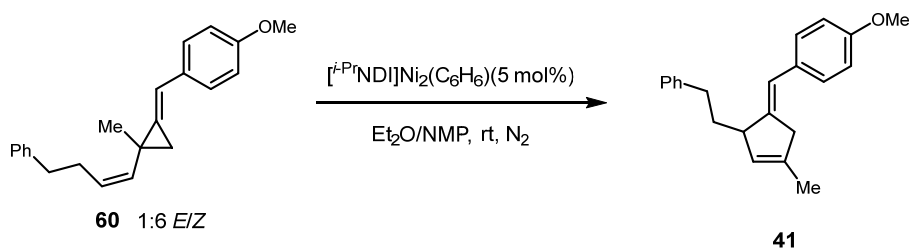

24 h: conversion = 3%,  
No detectable product

In an  $\text{N}_2$ -filled glovebox, a 2-dram vial was charged with  $[\text{i-PrNDI}]\text{Ni}_2(\text{C}_6\text{H}_6)$  **3** (3.7 mg, 0.05 mmol, 5 mol%) and a magnetic stir bar. A solution of 1-methoxy-4-((2-methyl-2-((*Z*)-4-phenylbut-1-en-1-yl)cyclopropylidene)methyl)benzene (**60**) (30.4 mg, 0.10 mmol) in  $\text{Et}_2\text{O}/\text{NMP}$  (0.80 mL/0.10 mL) was added followed by mesitylene (17.2 mg, 20  $\mu\text{L}$ ). The reaction mixture was stirred at room temperature and monitored by  $^1\text{H}$  NMR spectroscopy. After 24 h, an aliquot of reaction was directly loaded onto a 2-cm pad of  $\text{SiO}_2$  packed in a pipet. The produce mixture was eluted from the  $\text{SiO}_2$  pad with  $\text{CDCl}_3$  (approximately 1.5 mL). The conversion of **60** and yield of **41** were determined by  $^1\text{H}$  NMR integration against mesitylene.

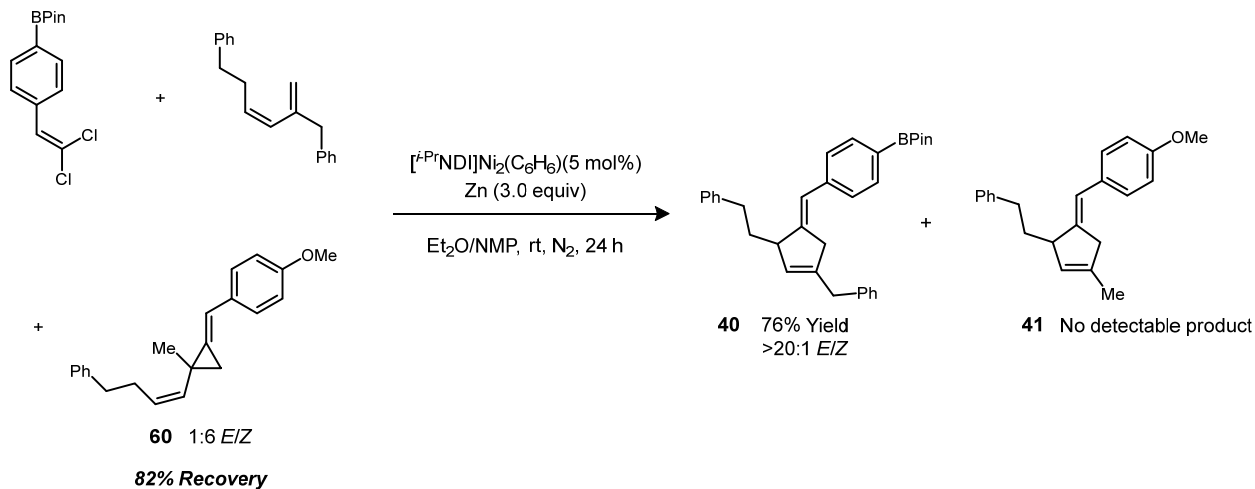

In an N<sub>2</sub>-filled glovebox, a 2-dram vial was charged with the [<sup>i</sup>PrNDI]Ni<sub>2</sub>(C<sub>6</sub>H<sub>6</sub>) complex **3** (7.3 mg, 0.01 mmol, 5 mol%), Zn powder (39.2 mg, 0.60 mmol, 3.0 equiv), Et<sub>2</sub>O/NMP (0.80 mL/0.15 mL), and a magnetic stir bar. (*Z*)-(2-methylenehex-3-ene-1,6-diyl)dibenzene (99.2 mg, 0.40 mmol, 2.0 equiv) was added by syringe followed by a solution of 2-(4-(2,2-dichlorovinyl)phenyl)-4,4,5,5-tetramethyl-1,3,2-dioxaborolane (59.6 mg, 0.20 mmol, 1.0 equiv) dissolved in Et<sub>2</sub>O (0.40 mL). After 30 min, a solution of 1-methoxy-4-((2-methyl-2-((*Z*)-4-phenylbut-1-en-1-yl)cyclopropylidene)methyl)benzene (**60**) (30.4 mg, 0.10 mmol, 0.50 equiv) dissolved in Et<sub>2</sub>O/NMP (0.40 mL/0.05 mL) was added followed by mesitylene (17.2 mg, 20 μL). The mixture was stirred at 22 °C. After 24 h, an aliquot of the reaction mixture was removed, and the substrate conversion, the yield of product, and the ratio of *E/Z* diastereomers were determined by <sup>1</sup>H NMR integration against mesitylene.

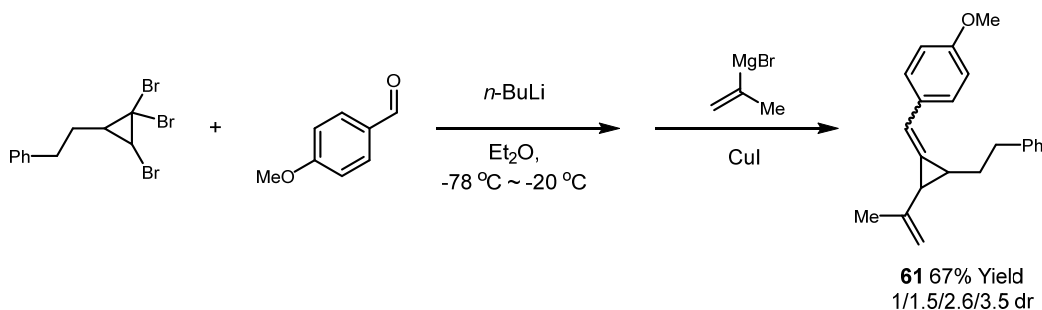

**1-Methoxy-4-((2-phenethyl-3-(prop-1-en-2-yl)cyclopropylidene)methyl)benzene (45).** Under an N<sub>2</sub> atmosphere, *n*-BuLi in hexane (8.8 mmol, 3.6 mL, 2.5 M, 2.0 equiv) was added dropwise to a stirred solution of *cis*-2-(2,2,3-tribromocyclopropyl)ethylbenzene (1.33 g, 4.4 mmol, 1.0 equiv) in Et<sub>2</sub>O (50 mL) cooled to -78 °C. The mixture was allowed to warm to -20 °C, and stirring was continued for 1 h. The reaction mixture was cooled to -50 °C, and 4-methoxybenzaldehyde (0.55 mL, 5.0 mmol, 1.0 equiv) was added. The reaction was allowed to warm to -20 °C, and stirring was continued 2.5 h. The reaction mixture was cooled to -50 °C, and CuI (0.167 g, 0.88 mmol, 0.20 equiv) was added followed by 2-methylallylmagnesium bromide solution (35.2 mL, 17.6 mmol, 0.5 M in THF, 4.0 equiv). The reaction mixture was slowly warmed to room temperature and stirring was continued overnight. The reaction was quenched with sat. aq. NH<sub>4</sub>Cl and stirred until the aqueous phase became blue. The aqueous phase was extracted with diethyl ether (3 x 30 mL). The combined organic phases were washed with brine (1 x 30 mL), dried over MgSO<sub>4</sub>, and filtered. The filtrate was concentrated under reduced pressure. The crude product was purified by column chromatography (SiO<sub>2</sub>, 1:4 CH<sub>2</sub>Cl<sub>2</sub>/hexane) to obtain **61** as a pale yellow oil (0.89 g, 67% yield). The product was found to be a mixture of four isomers (**a**, **b**, **c**, **d**): 1/1.5/2.6/3.5 ratio.

<sup>1</sup>H NMR (800 MHz, CDCl<sub>3</sub>) δ 7.39 – 6.84 (m, 9H, Aromatic, **a**, **b**, **c**, **d**), 6.71 (t, *J* = 2.1 Hz, 1H, -C=CH-, **b**), 6.70 (t, *J* = 2.1 Hz, 1H, -C=CH-, **a**), 6.63 (t, *J* = 2.0 Hz, 1H, -C=CH-, **d**), 6.60 (t, *J* = 1.9 Hz, 1H, -C=CH-, **c**), 4.93 – 4.91 (m, 1H, -MeC=CH<sub>2</sub>, **a**), 4.86 - 4.85 (m, 1H, -MeC=CH<sub>2</sub>, **c**), 4.80 – 4.79 (m, 2H, -MeC=CH<sub>2</sub>, **b**, **d**), 4.78 - 4.77 (m, 1H, -MeC=CH<sub>2</sub>, **d**), 4.73-4.72 (m, 2H, -MeC=CH<sub>2</sub>, **a**, **b**), 4.40-4.39 (m, 1H, -MeC=CH<sub>2</sub>, **c**), 3.81 (s, 3H, -OCH<sub>3</sub>, **b**), 3.81 (s, 3H, -OCH<sub>3</sub>, **a**), 3.80 (s, 3H, -OCH<sub>3</sub>, **c**), 3.80 (s, 3H, -OCH<sub>3</sub>, **d**), 2.86 – 1.25 (aliphatic, 6H, **a**, **b**, **c**, **d**), 1.93 (t, *J* = 1.1 Hz, 3H, -CH<sub>3</sub>, **a**), 1.88 (t, *J* = 1.2 Hz, 3H, -CH<sub>3</sub>, **c**), 1.68 (dd, *J* = 1.5, 0.8 Hz, 3H, -CH<sub>3</sub>, **b**), 1.57 (dd, *J* = 1.5, 0.8 Hz, 3H, -CH<sub>3</sub>, **d**).



$^{13}\text{C}\{^1\text{H}\}$  NMR (201 MHz,  $\text{CDCl}_3$ )  $\delta$  158.69, 158.61, 144.70, 144.17, 142.33, 142.25, 141.95, 141.88, 140.77, 139.65, 130.93, 130.64, 130.54, 130.48, 129.36, 128.84, 128.59, 128.56, 128.49, 128.38, 128.36, 128.33, 128.11, 128.02, 127.93, 125.86, 125.80, 125.76, 119.27, 119.20, 119.13, 118.78, 113.99, 113.95, 113.80, 113.70, 113.09, 112.20, 110.31, 109.46, 55.32, 55.28, 55.25, 36.00, 35.96, 35.75, 35.27, 34.77, 33.78, 31.09, 28.15, 27.90, 27.67, 27.18, 24.94, 24.41, 24.26, 24.00, 23.34, 21.99, 20.57, 20.34, 19.72.

HRMS (ESI): calcd for  $\text{C}_{22}\text{H}_{25}\text{O}^+$  [ $\text{M} + \text{H}$ ] $^+$ : 305.1900; found:305.1898.

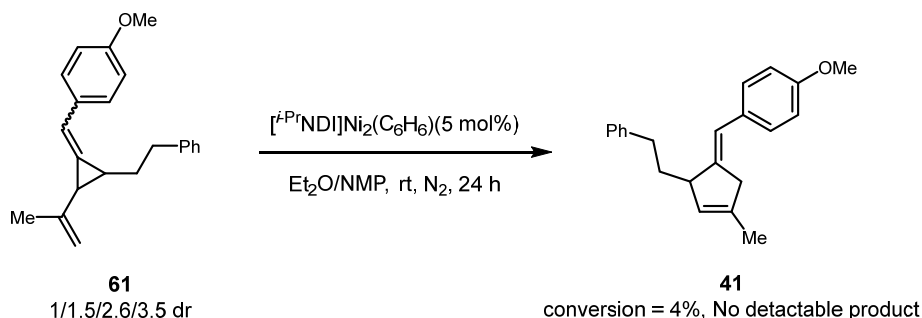

In an  $\text{N}_2$ -filled glovebox, a 2-dram vial was charged with  $[\text{i-PrNDI}]\text{Ni}_2(\text{C}_6\text{H}_6)$  **3** (3.7 mg, 0.05 mmol, 5 mol%) and a magnetic stir bar. A solution of 1-methoxy-4-((2-phenethyl-3-(prop-1-en-2-yl)cyclopropylidene)methyl)benzene (**61**) (30.4 mg, 0.10 mmol) in  $\text{Et}_2\text{O}/\text{NMP}$  (0.80 mL/0.10 mL) was added followed by mesitylene (17.2 mg, 20  $\mu\text{L}$ ). The reaction mixture was stirred at room temperature and monitored by  $^1\text{H}$  NMR spectroscopy. After 24 h, an aliquot of reaction was directly loaded onto a 2-cm pad of  $\text{SiO}_2$  packed in a pipet. The produce mixture was eluted from the  $\text{SiO}_2$  pad with  $\text{CDCl}_3$  (approximately 1.5 mL). The conversion of **61** and yield of **41** were determined by  $^1\text{H}$  NMR integration against mesitylene.

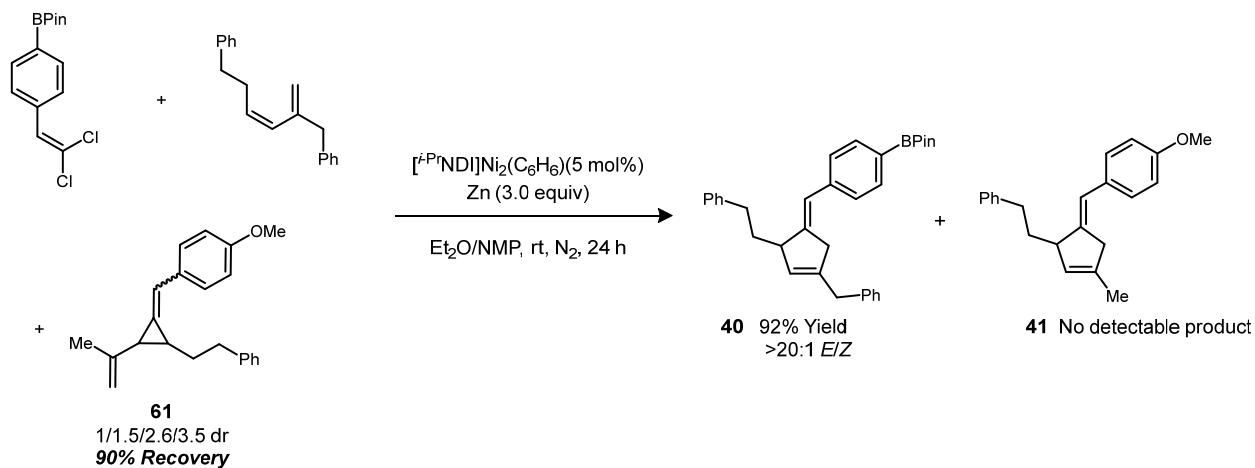

In an  $\text{N}_2$ -filled glovebox, a 2-dram vial was charged with the  $[\text{i-PrNDI}]\text{Ni}_2(\text{C}_6\text{H}_6)$  complex **3** (7.3 mg, 0.01 mmol, 5 mol%), Zn powder (39.2 mg, 0.60 mmol, 3.0 equiv),  $\text{Et}_2\text{O}/\text{NMP}$  (0.80 mL/0.15 mL), and a magnetic stir bar. (*Z*)-(2-methylenehex-3-ene-1,6-diyl)dibenzene (99.2 mg, 0.40 mmol, 2.0 equiv) was added by microsyringe followed by a solution of 2-(4-(2,2-dichlorovinyl)phenyl)-4,4,5,5-tetramethyl-1,3,2-dioxaborolane (59.6 mg, 0.20 mmol, 1.0 equiv) dissolved in  $\text{Et}_2\text{O}$  (0.40 mL). After 30 min, a solution of 1-methoxy-4-((2-phenethyl-3-(prop-1-

en-2-yl)cyclopropylidene)methyl)benzene (**61**) (30.4 mg, 0.10 mmol, 0.50 equiv) dissolved in Et<sub>2</sub>O/NMP (0.40 mL/0.05 mL) was added followed by mesitylene (17.2 mg, 20 μL). The mixture was stirred at 22 °C. After 24 h, an aliquot of the reaction mixture was removed, and the substrate conversion, the yield of product, and the ratio of *E/Z* diastereomers were determined by <sup>1</sup>H NMR integration against mesitylene.

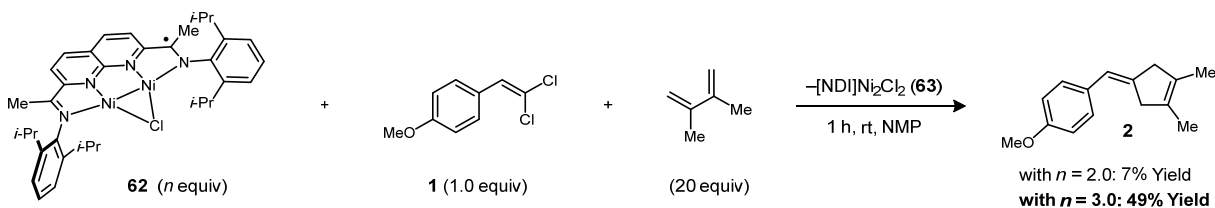

### Stoichiometric [4 + 1]-cycloaddition using an isolable low-valent [NDI]Ni<sub>2</sub>Cl complex.

In an N<sub>2</sub>-filled glovebox, the [<sup>*i*</sup>-PrNDI]Ni<sub>2</sub>Cl complex **62** (20.6 mg, 0.030 mmol) was dissolved in NMP (0.1 mL) in a 2-dram vial, generating a dark purple solution. 2,3-Dimethylbutadiene (23 μL, 0.20 mmol or 27 μL, 0.30 mmol, 20 equiv) was added by microsyringe. A solution of 1-(2,2-dichlorovinyl)-4-methoxybenzene (2.0 mg, 0.010 mmol, or 3.1 mg, 0.015 mmol, 1.0 equiv) in NMP (0.10 mL) was added. The reaction mixture was stirred at room temperature. After 1 h, an aliquot of product mixture was removed, diluted with C<sub>6</sub>D<sub>6</sub> and analyzed by <sup>1</sup>H NMR spectroscopy. The yield of the [4+1] product was determined by <sup>1</sup>H NMR integration against mesitylene.

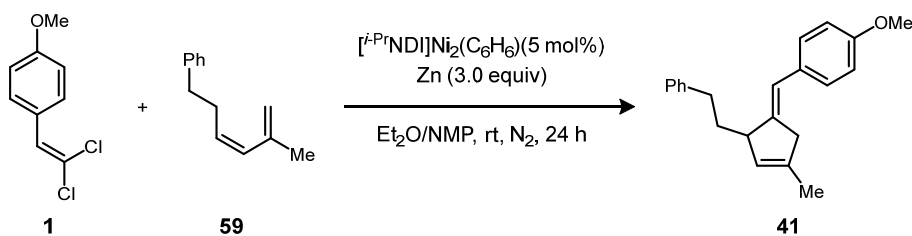

**Dependence of product distribution on conversion.** In an N<sub>2</sub>-filled glovebox, a 3-dram vial was charged with the [<sup>*i*</sup>-PrNDI]Ni<sub>2</sub>(C<sub>6</sub>H<sub>6</sub>) complex **3** (7.3 mg, 0.01 mmol, 5 mol%), Zn powder (39.2 mg, 0.60 mmol 3.0 equiv), Et<sub>2</sub>O (1.60 mL), NMP (0.20 mL), and a magnetic stir bar. (*Z*)-(5-methylhexa-3,5-dien-1-yl)benzene (**59**) (69.5 mg, 0.40 mmol, 2.0 equiv), 1-(2,2-dichlorovinyl)-4-methoxybenzene (**1**) (40.6 mg, 0.20 mmol, 1.0 equiv) and mesitylene (20 μL) were successively added to the catalyst/reductant mixture by microsyringe. The vial was sealed, and the reaction mixture was stirred at room temperature. At the indicated time points, an aliquot of the reaction mixture was removed and loaded directly onto a 2-cm pad of SiO<sub>2</sub> packed in a pipet. The mixture was eluted from the SiO<sub>2</sub> pad with CDCl<sub>3</sub> (approx. 1.5 mL). The conversion of **1**, yield of products and selectivity were determined by <sup>1</sup>H NMR integration against mesitylene.

- 30 min, 27% conversion of **1**, 28% yield of **41**, *E/Z* > 20:1, no detectable **60** or **61**.
- 2 h, 59% conversion of **1**, 56% yield of **41**, *E/Z* > 20:1, no detectable **60** or **61**.
- 5 h, 77% conversion of **1**, 69% yield of **41**, *E/Z* > 20:1, no detectable **60** or **61**.
- 10 h, 84% conversion of **1**, 75% yield of **41**, *E/Z* > 20:1, no detectable **60** or **61**.

## 11. X-Ray Diffraction Data

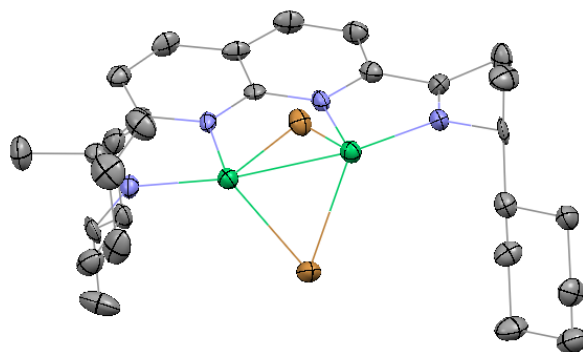

**Fig. S9.** Solid-state structure of **(S,S)-58**.

**Table S5.** Crystallographic information for **(S,S)-58** (30–35).

| <b>Crystal data</b>                                                                |                                                                                                                   |
|------------------------------------------------------------------------------------|-------------------------------------------------------------------------------------------------------------------|
| Chemical formula                                                                   | C <sub>28</sub> H <sub>40</sub> Br <sub>2</sub> N <sub>4</sub> Ni <sub>2</sub> ·2(C <sub>6</sub> H <sub>6</sub> ) |
| <i>M<sub>r</sub></i>                                                               | 866.09                                                                                                            |
| Crystal system, space group                                                        | Orthorhombic, <i>P2<sub>1</sub>2<sub>1</sub>2<sub>1</sub></i>                                                     |
| Temperature (K)                                                                    | 100                                                                                                               |
| <i>a</i> , <i>b</i> , <i>c</i> (Å)                                                 | 13.8800 (2), 14.2983 (2), 19.6591 (3)                                                                             |
| <i>V</i> (Å <sup>3</sup> )                                                         | 3901.55 (10)                                                                                                      |
| <i>Z</i>                                                                           | 4                                                                                                                 |
| Radiation type                                                                     | Cu <i>K</i> α                                                                                                     |
| μ (mm <sup>-1</sup> )                                                              | 3.84                                                                                                              |
| Crystal size (mm)                                                                  | 0.23 × 0.19 × 0.11                                                                                                |
| <b>Data collection</b>                                                             |                                                                                                                   |
| Diffractometer                                                                     | Rigaku Rapid II curved image plate diffractometer                                                                 |
| Absorption correction                                                              | Multi-scan <i>SCALEPACK</i> (Otwinowski & Minor, 1997)                                                            |
| <i>T<sub>min</sub></i> , <i>T<sub>max</sub></i>                                    | 0.555, 0.677                                                                                                      |
| No. of measured, independent and observed [ <i>I</i> > 2σ( <i>I</i> )] reflections | 38055, 7509, 7441                                                                                                 |
| <i>R<sub>int</sub></i>                                                             | 0.034                                                                                                             |
| (sin θ/λ) <sub>max</sub> (Å <sup>-1</sup> )                                        | 0.618                                                                                                             |

| <b>Refinement</b>                                           |                                                                     |
|-------------------------------------------------------------|---------------------------------------------------------------------|
| $R[F^2 > 2\sigma(F^2)], wR(F^2), S$                         | 0.037, 0.096, 1.18                                                  |
| No. of reflections                                          | 7509                                                                |
| No. of parameters                                           | 438                                                                 |
| H-atom treatment                                            | H-atom parameters constrained                                       |
|                                                             | $w = 1/[\sigma^2(F_o^2) + 13.6065P]$ where $P = (F_o^2 + 2F_c^2)/3$ |
| $\Delta\rho_{\max}, \Delta\rho_{\min}$ (e Å <sup>-3</sup> ) | 0.89, -0.90                                                         |
| Absolute structure                                          | Refined as an inversion twin.                                       |
| Absolute structure parameter                                | 0.02 (3)                                                            |

Refined as a 2-component inversion twin.

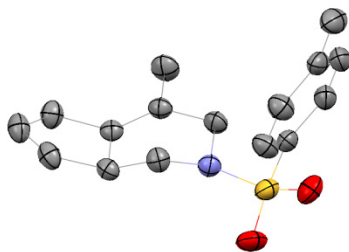

**Fig. S10.** Solid-state structure of **57**.

**Table S6.** Crystallographic information for **57** (30–35).

| <b>Crystal data</b>                                                                |                                                                                                                                  |
|------------------------------------------------------------------------------------|----------------------------------------------------------------------------------------------------------------------------------|
| Chemical formula                                                                   | C <sub>16</sub> H <sub>19</sub> NO <sub>2</sub> S                                                                                |
| <i>M</i> <sub>r</sub>                                                              | 289.38                                                                                                                           |
| Crystal system, space group                                                        | Monoclinic, <i>P2</i> <sub>1</sub>                                                                                               |
| Temperature (K)                                                                    | 150                                                                                                                              |
| <i>a</i> , <i>b</i> , <i>c</i> (Å)                                                 | 12.5776 (8), 8.6526 (6), 13.9394 (9)                                                                                             |
| β (°)                                                                              | 100.008 (2)                                                                                                                      |
| <i>V</i> (Å <sup>3</sup> )                                                         | 1493.93 (17)                                                                                                                     |
| <i>Z</i>                                                                           | 4                                                                                                                                |
| Radiation type                                                                     | Mo <i>K</i> α                                                                                                                    |
| μ (mm <sup>-1</sup> )                                                              | 0.22                                                                                                                             |
| Crystal size (mm)                                                                  | 0.34 × 0.25 × 0.09                                                                                                               |
| <b>Data collection</b>                                                             |                                                                                                                                  |
| Diffractometer                                                                     | Bruker AXS D8 Quest CMOS diffractometer                                                                                          |
| Absorption correction                                                              | Multi-scan <i>SADABS</i> 2016/2: Krause, L., Herbst-Irmer, R., Sheldrick G.M. & Stalke D., <i>J. Appl. Cryst.</i> 48 (2015) 3-10 |
| <i>T</i> <sub>min</sub> , <i>T</i> <sub>max</sub>                                  | 0.672, 0.746                                                                                                                     |
| No. of measured, independent and observed [ <i>I</i> > 2σ( <i>I</i> )] reflections | 55729, 10508, 9499                                                                                                               |
| <i>R</i> <sub>int</sub>                                                            | 0.043                                                                                                                            |
| (sin θ/λ) <sub>max</sub> (Å <sup>-1</sup> )                                        | 0.751                                                                                                                            |
| <b>Refinement</b>                                                                  |                                                                                                                                  |

|                                                             |                                                                                                                              |
|-------------------------------------------------------------|------------------------------------------------------------------------------------------------------------------------------|
| $R[F^2 > 2\sigma(F^2)], wR(F^2), S$                         | 0.039, 0.111, 1.03                                                                                                           |
| No. of reflections                                          | 10508                                                                                                                        |
| No. of parameters                                           | 448                                                                                                                          |
| No. of restraints                                           | 391                                                                                                                          |
| H-atom treatment                                            | H-atom parameters constrained                                                                                                |
| $\Delta\rho_{\max}, \Delta\rho_{\min}$ (e Å <sup>-3</sup> ) | 0.43, -0.45                                                                                                                  |
| Absolute structure                                          | Flack x determined using 4106 quotients [(I+)-(I-)]/[(I+)+(I-)] (Parsons, Flack and Wagner, Acta Cryst. B69 (2013) 249-259). |
| Absolute structure parameter                                | 0.016 (11)                                                                                                                   |

The structure exhibits pseudo-centrosymmetric symmetry, emulating space group P2(1)/c. The pseudo-inversion symmetry is broken by the geometry around C7, which is always S, and by partial rotation of the bicyclic moiety in one of the two molecules. The two disordered moieties were restrained to have similar geometries as the not disordered equivalent moiety of the other molecule. Uij components of ADPs for disordered atoms closer to each other than 2.0 Angstrom were restrained to be similar. Subject to these conditions the occupancy ratio refined to 0.692(4) to 0.308(4).

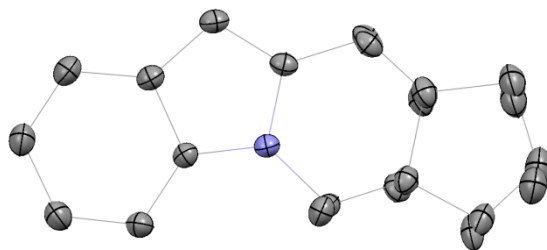

**Fig. S11.** Solid-state structure of **53**.

**Table S7.** Crystallographic information for **53** (30–35).

| <b>Crystal data</b>                                                                                            |                                                                                                                                  |
|----------------------------------------------------------------------------------------------------------------|----------------------------------------------------------------------------------------------------------------------------------|
| Chemical formula                                                                                               | C <sub>60</sub> H <sub>52</sub> N <sub>4</sub>                                                                                   |
| <i>M<sub>r</sub></i>                                                                                           | 829.05                                                                                                                           |
| Crystal system, space group                                                                                    | Monoclinic, <i>P2<sub>1</sub>/n</i>                                                                                              |
| Temperature (K)                                                                                                | 150                                                                                                                              |
| <i>a</i> , <i>b</i> , <i>c</i> (Å)                                                                             | 7.6190 (3), 6.0888 (2), 23.0370 (9)                                                                                              |
| β (°)                                                                                                          | 95.4168 (19)                                                                                                                     |
| <i>V</i> (Å <sup>3</sup> )                                                                                     | 1063.93 (7)                                                                                                                      |
| <i>Z</i>                                                                                                       | 1                                                                                                                                |
| Radiation type                                                                                                 | Mo <i>K</i> α                                                                                                                    |
| μ (mm <sup>-1</sup> )                                                                                          | 0.08                                                                                                                             |
| Crystal size (mm)                                                                                              | 0.60 × 0.20 × 0.05                                                                                                               |
| <b>Data collection</b>                                                                                         |                                                                                                                                  |
| Diffractometer                                                                                                 | Bruker AXS D8 Quest CMOS diffractometer                                                                                          |
| Absorption correction                                                                                          | Multi-scan <i>SADABS</i> 2016/2: Krause, L., Herbst-Irmer, R., Sheldrick G.M. & Stalke D., <i>J. Appl. Cryst.</i> 48 (2015) 3-10 |
| <i>T<sub>min</sub></i> , <i>T<sub>max</sub></i>                                                                | 0.695, 0.747                                                                                                                     |
| No. of measured, independent and observed [ <i>I</i> > 2σ( <i>I</i> )] reflections                             | 36353, 3877, 3090                                                                                                                |
| <i>R<sub>int</sub></i>                                                                                         | 0.042                                                                                                                            |
| (sin θ/λ) <sub>max</sub> (Å <sup>-1</sup> )                                                                    | 0.769                                                                                                                            |
| <b>Refinement</b>                                                                                              |                                                                                                                                  |
| <i>R</i> [ <i>F</i> <sup>2</sup> > 2σ( <i>F</i> <sup>2</sup> )], <i>wR</i> ( <i>F</i> <sup>2</sup> ), <i>S</i> | 0.044, 0.120, 1.04                                                                                                               |

|                                                       |                               |
|-------------------------------------------------------|-------------------------------|
| No. of reflections                                    | 3877                          |
| No. of parameters                                     | 191                           |
| No. of restraints                                     | 228                           |
| H-atom treatment                                      | H-atom parameters constrained |
| $\Delta_{\max}, \Delta_{\min}$ (e $\text{\AA}^{-3}$ ) | 0.37, -0.25                   |



## 12. NMR Spectra

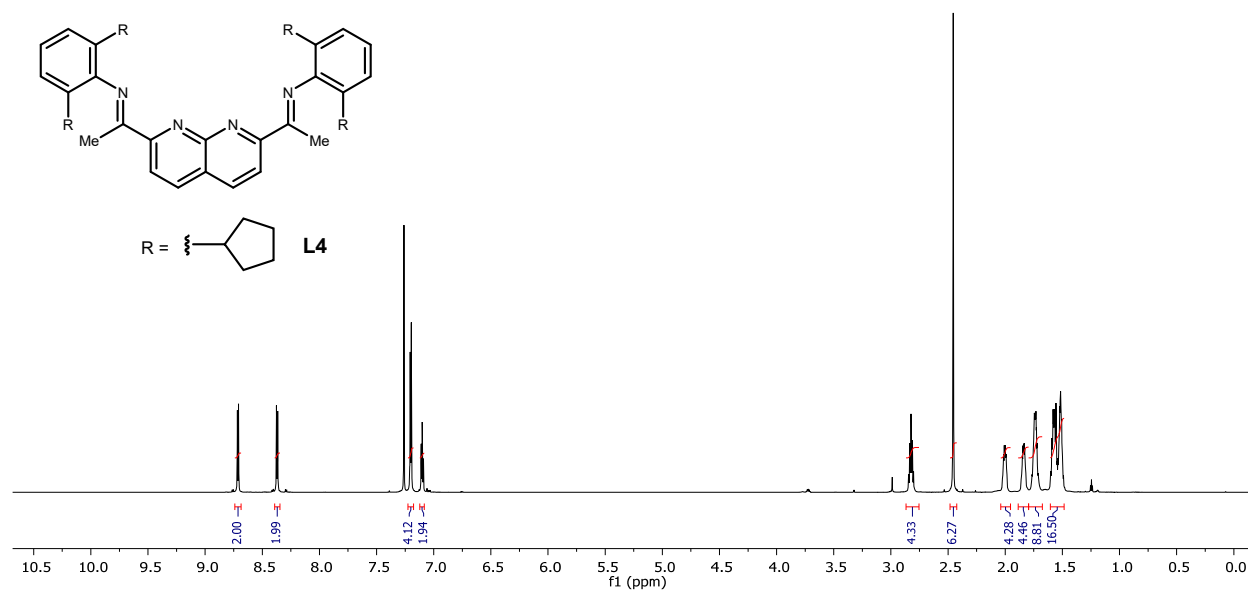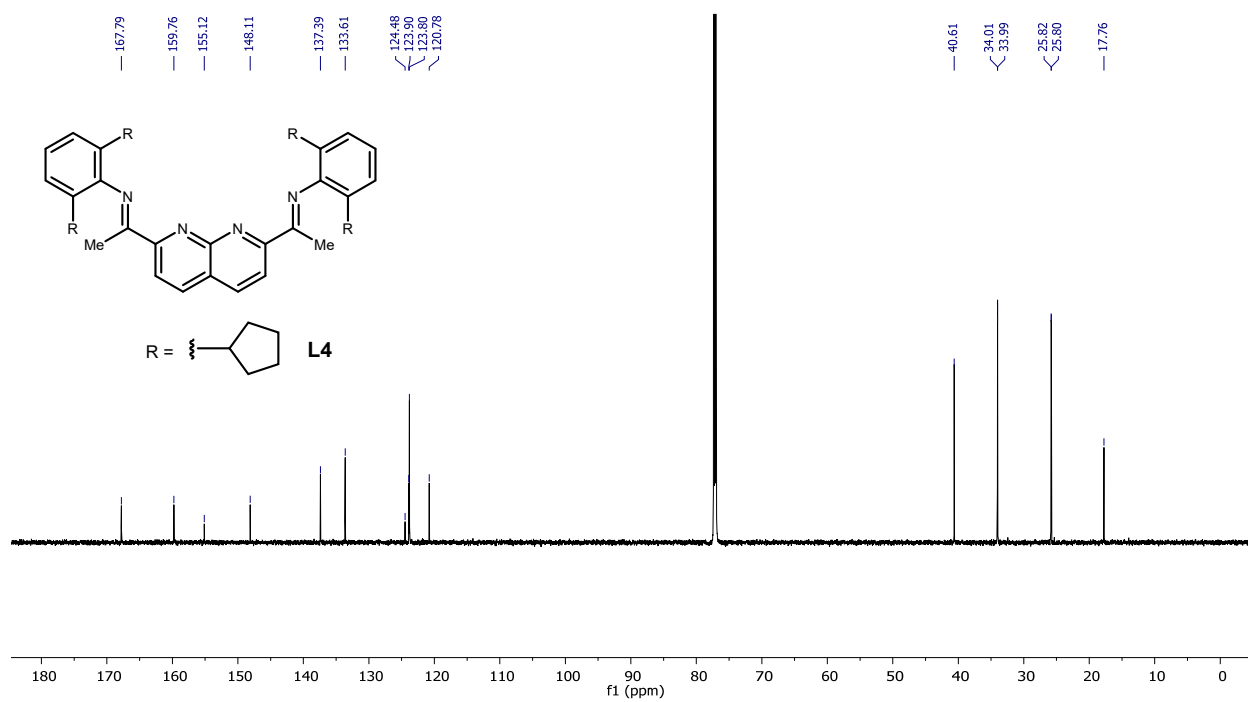

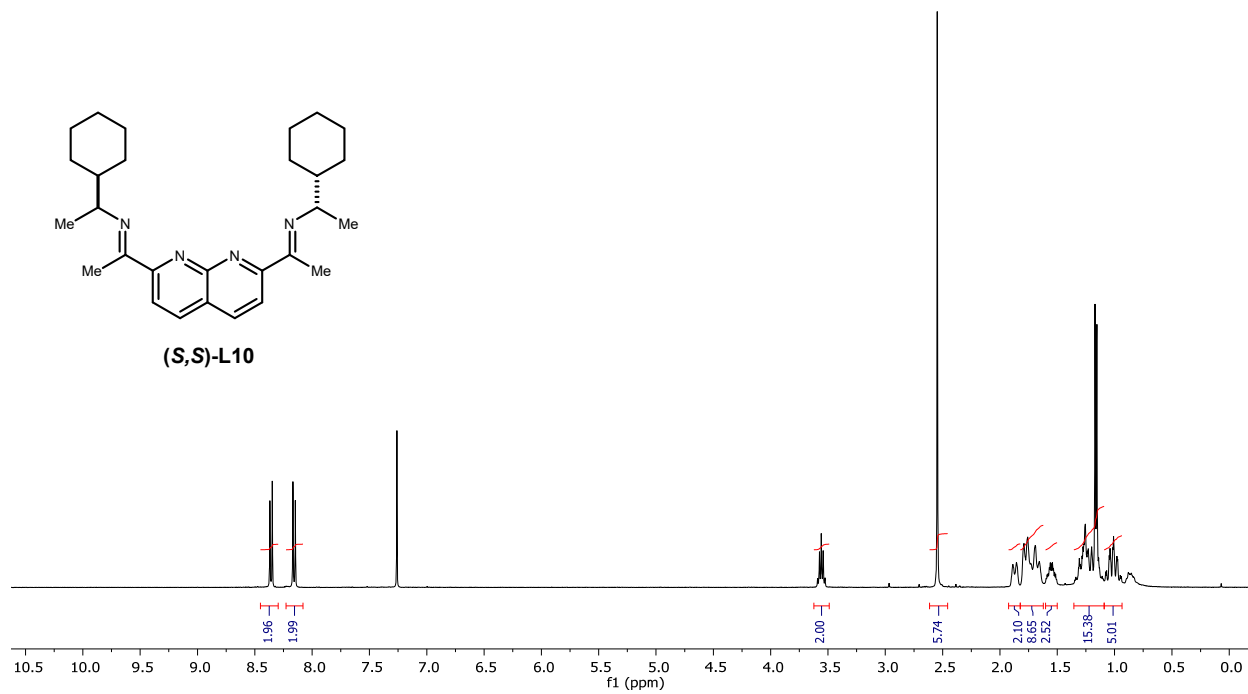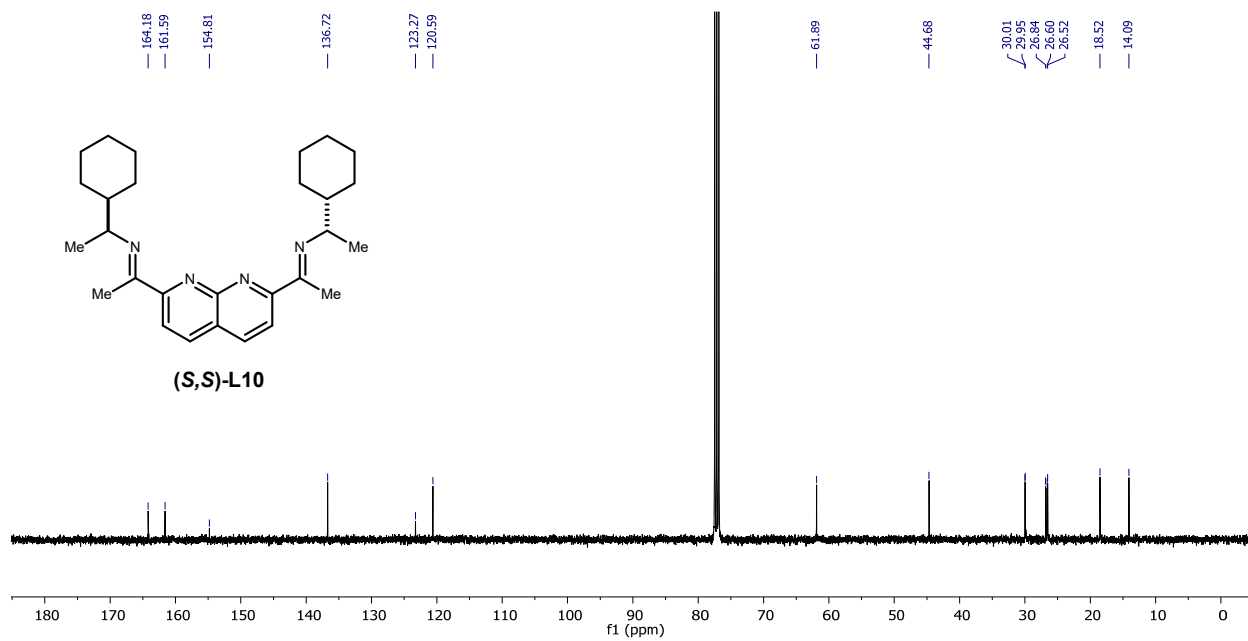

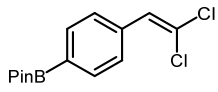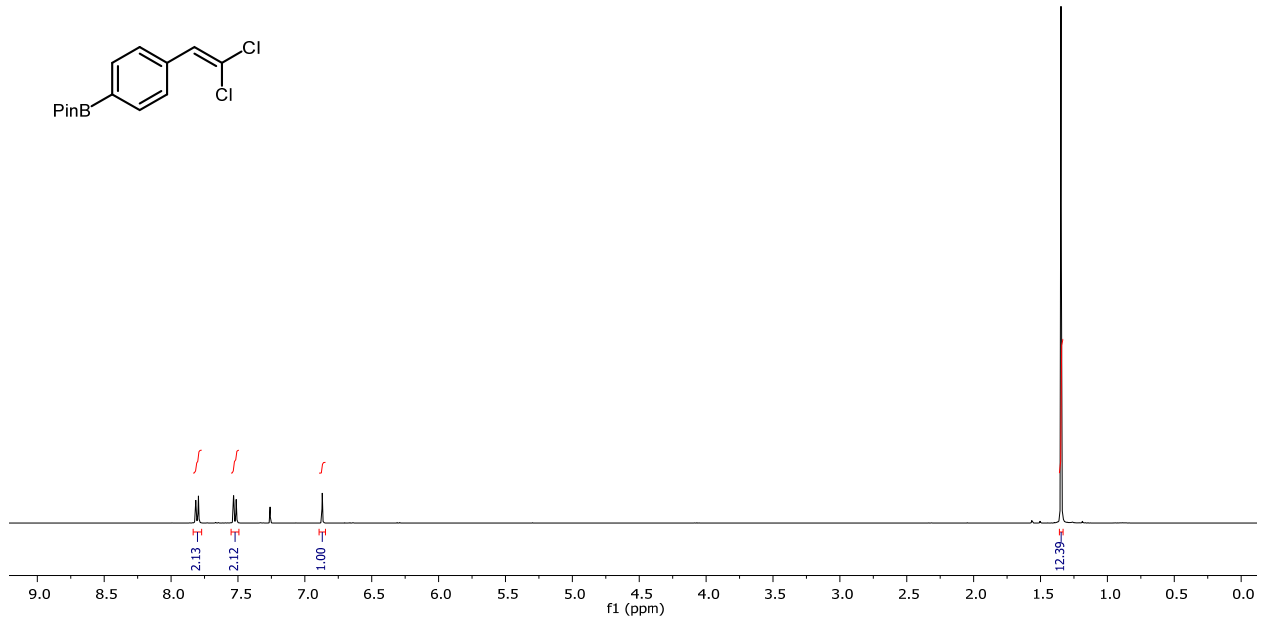

136.11  
134.97  
128.78  
127.98  
121.96

84.09

25.02

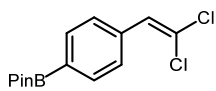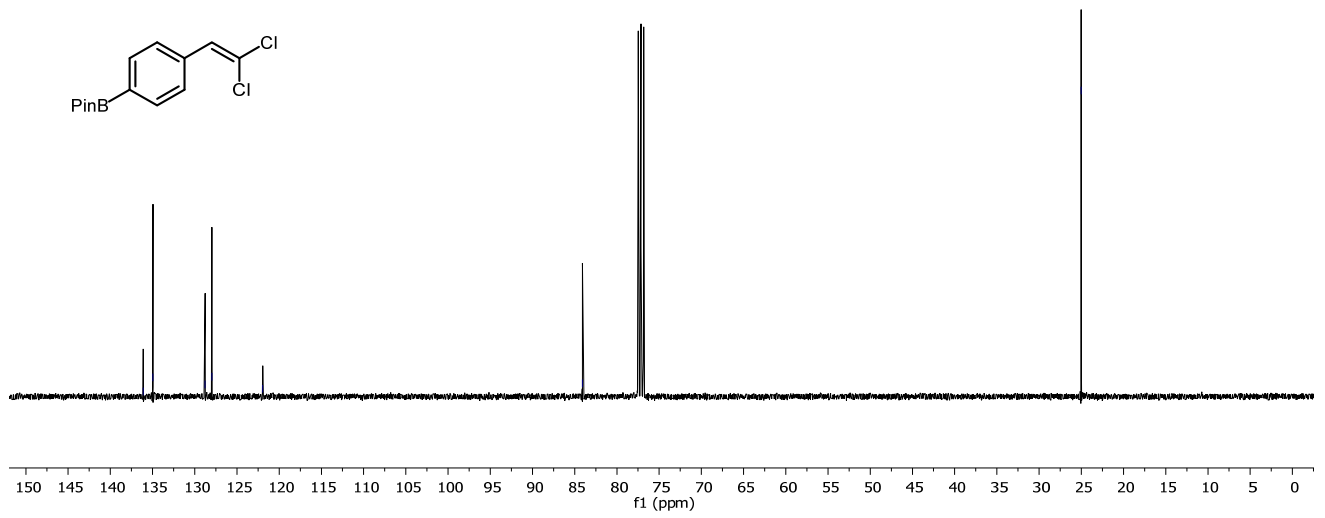

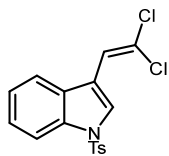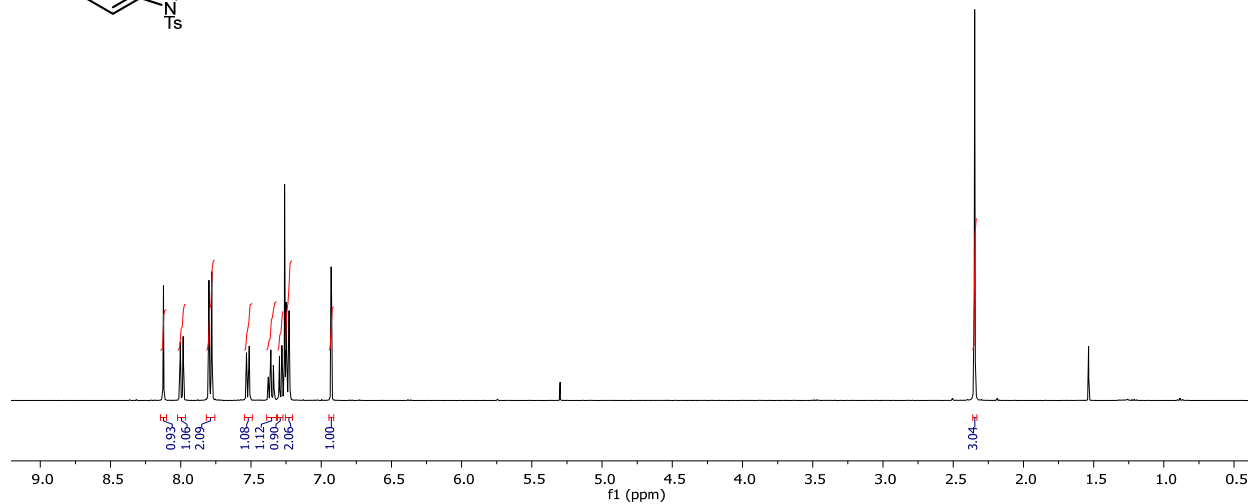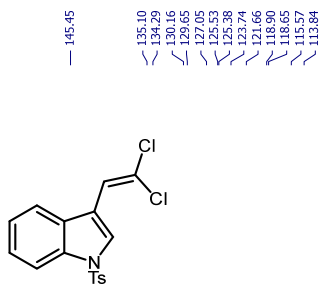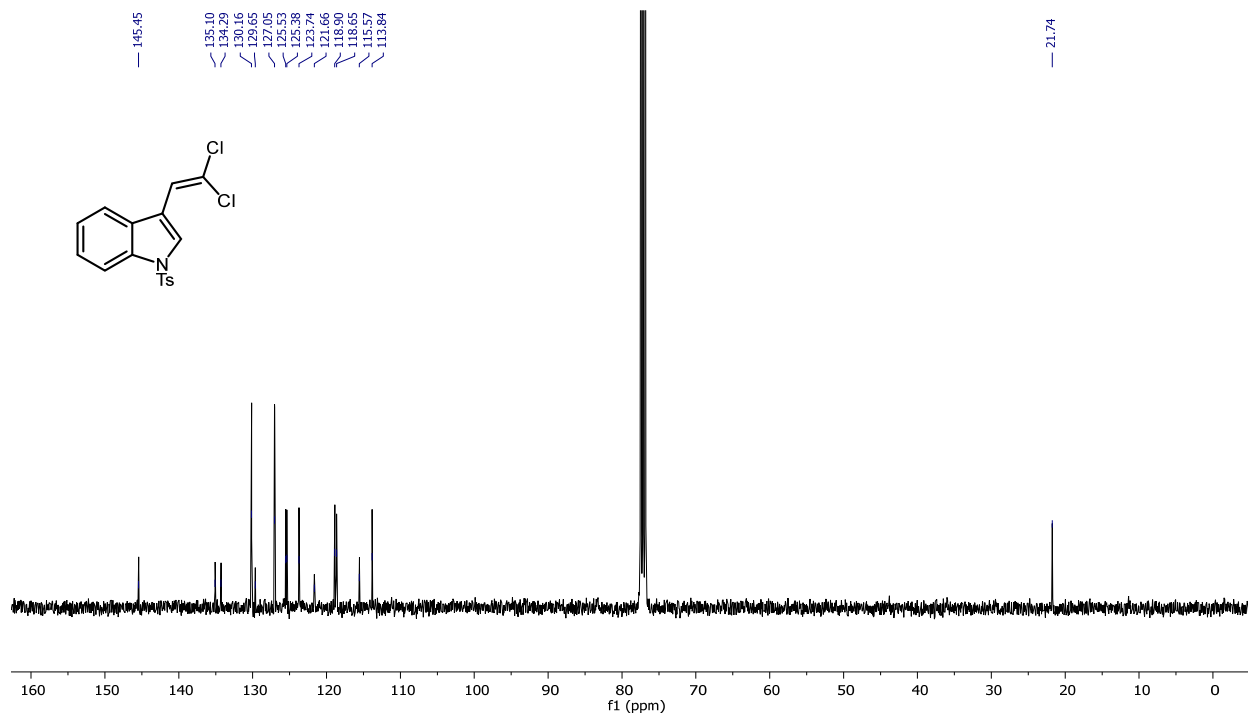

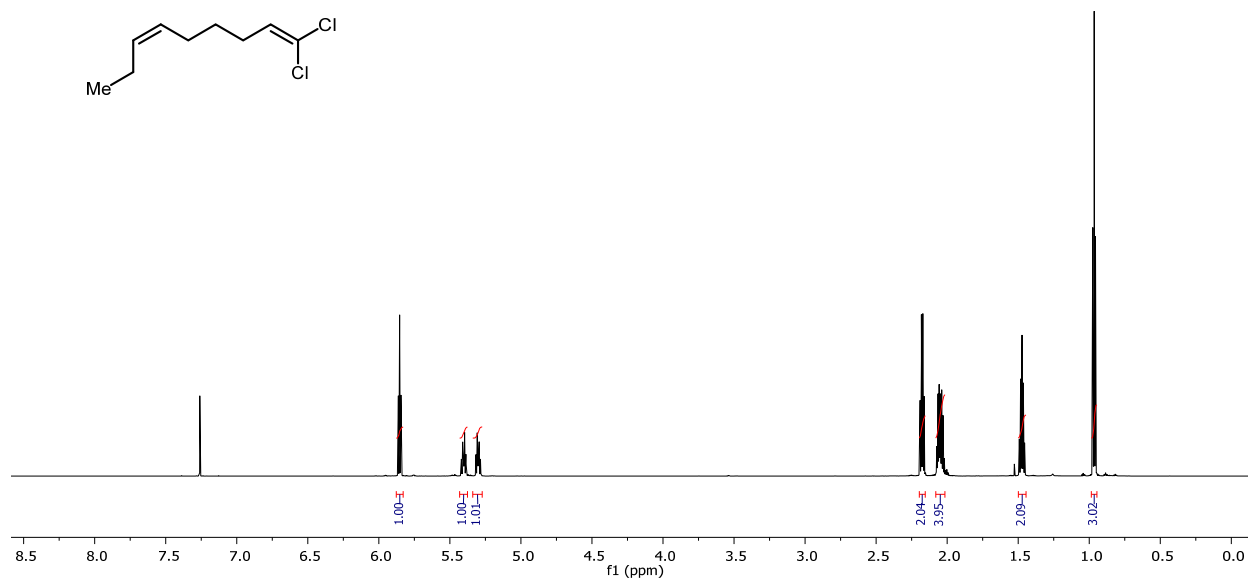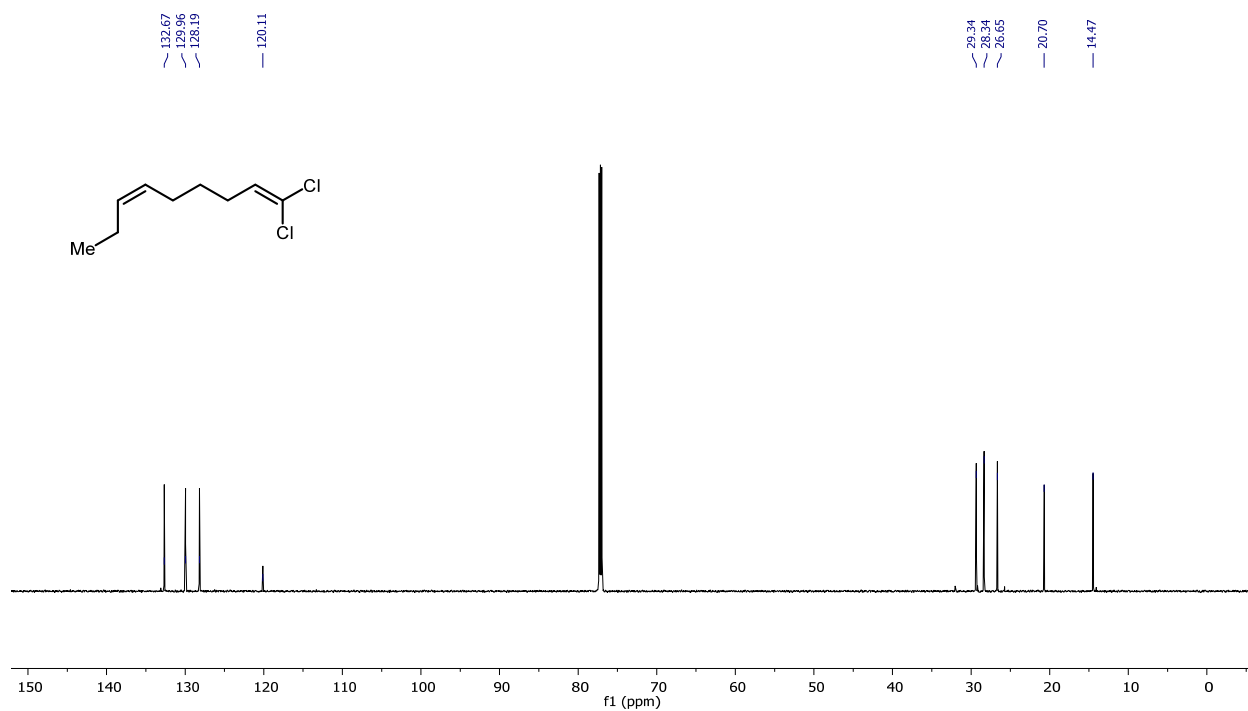

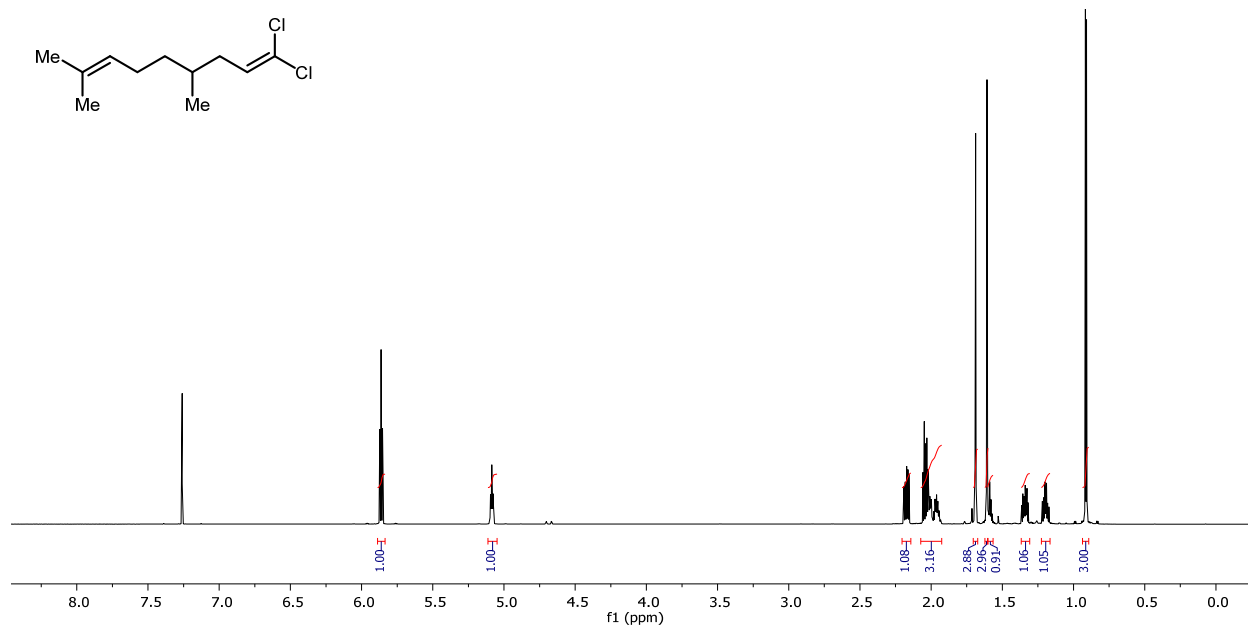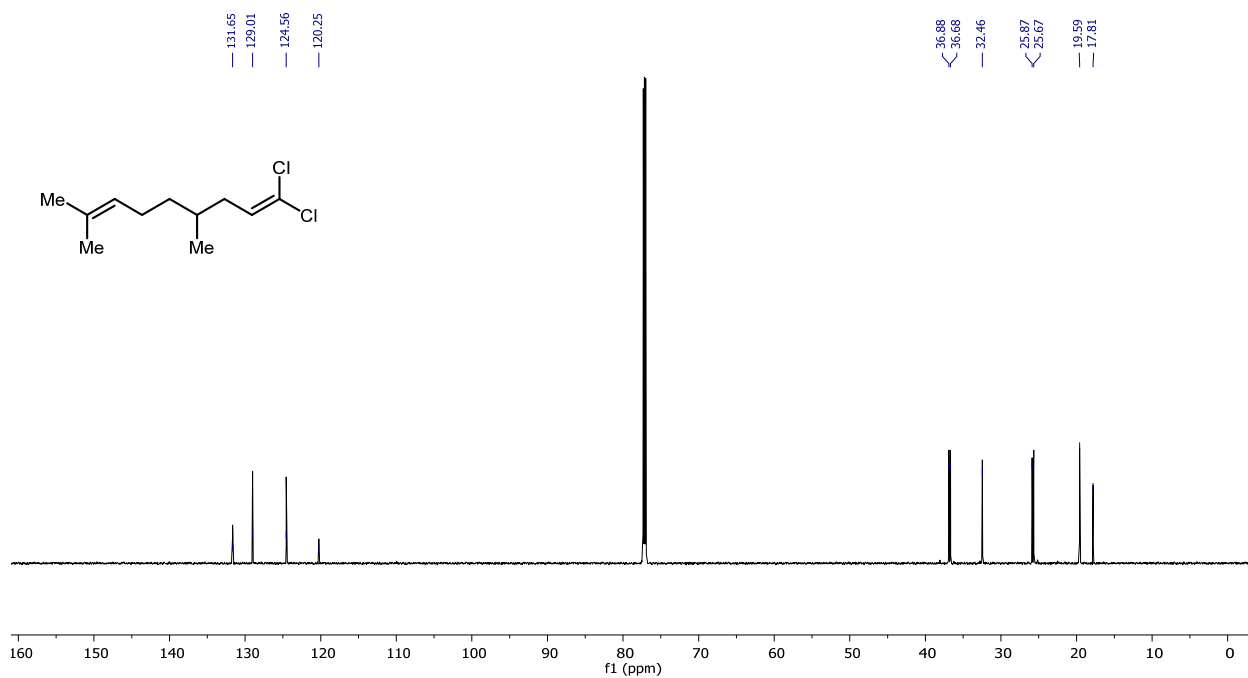

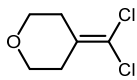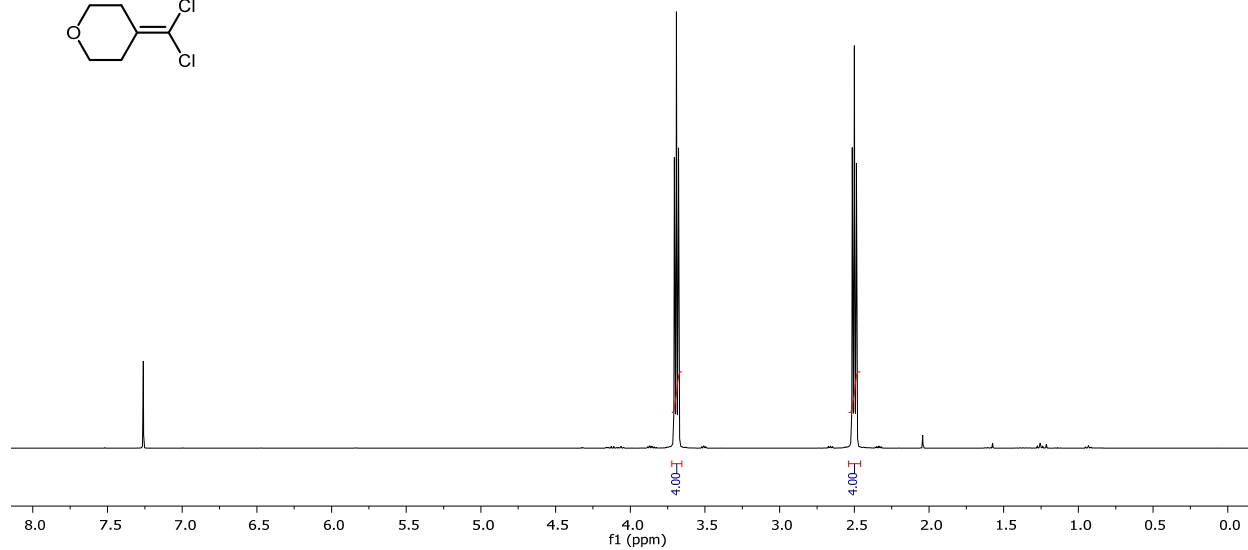

133.12

113.55

67.51

32.17

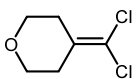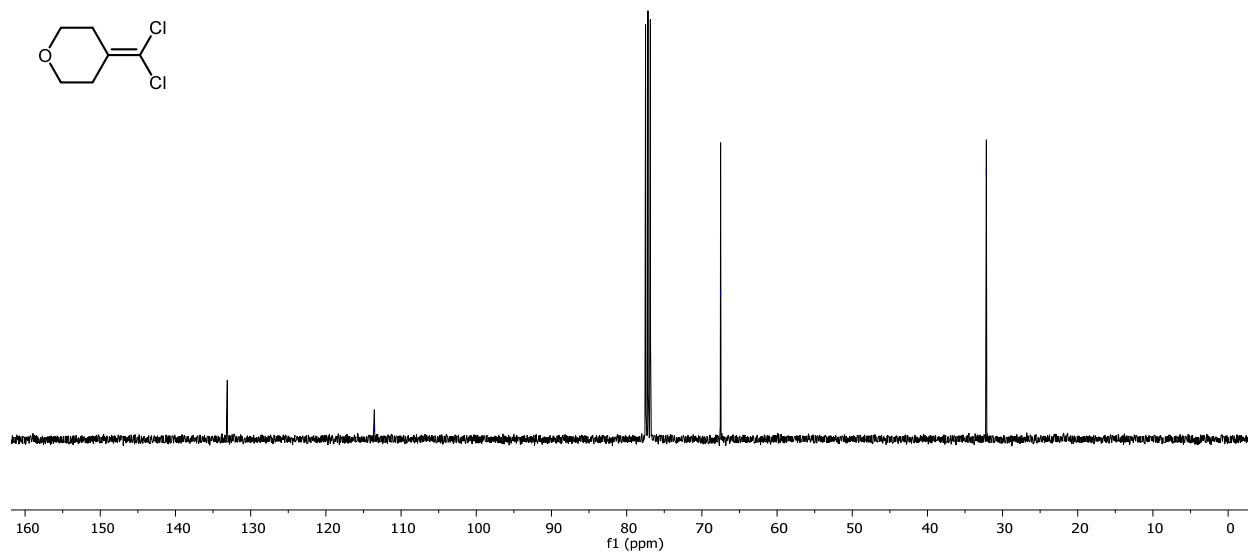

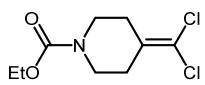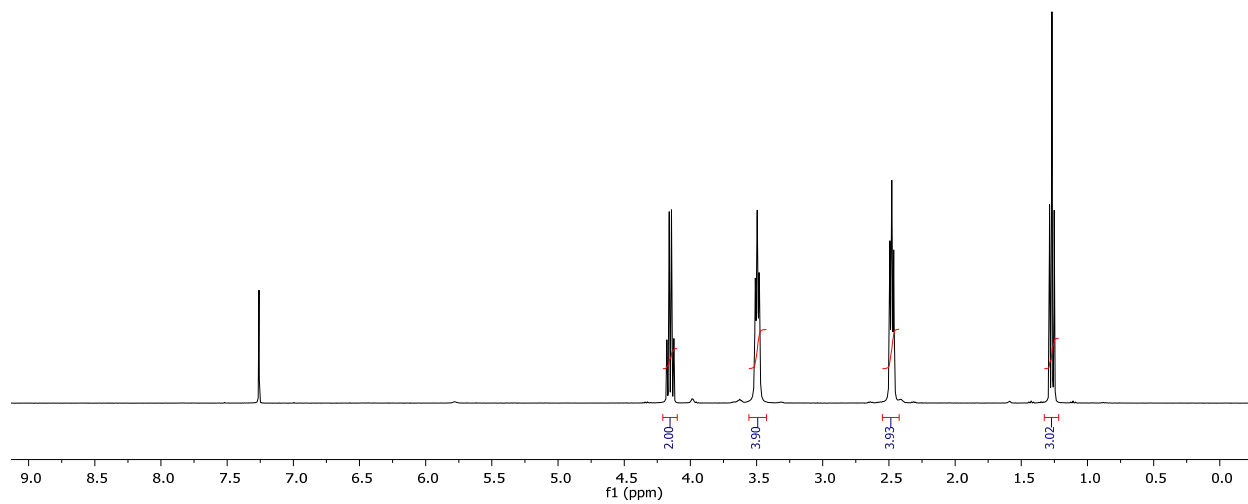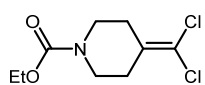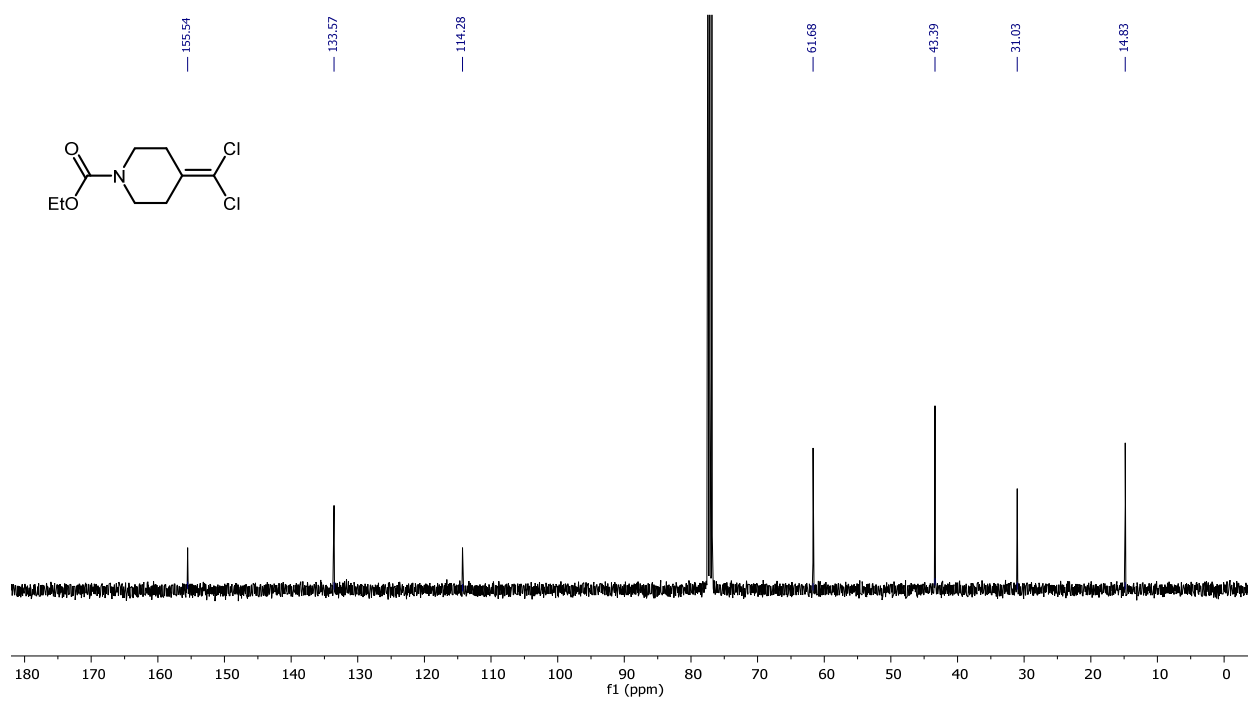



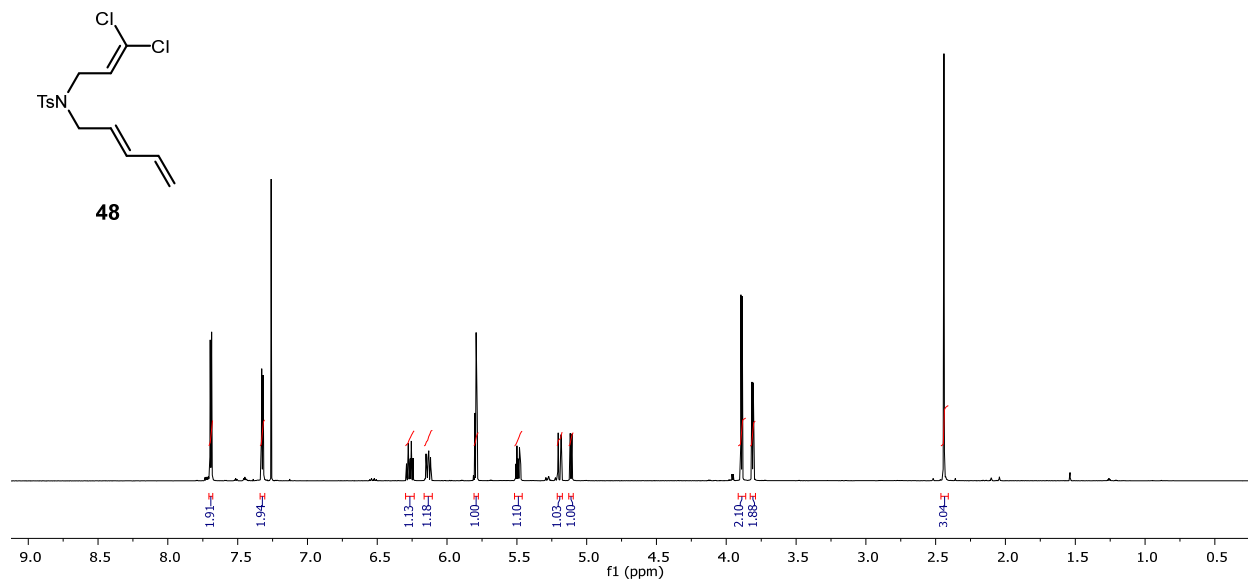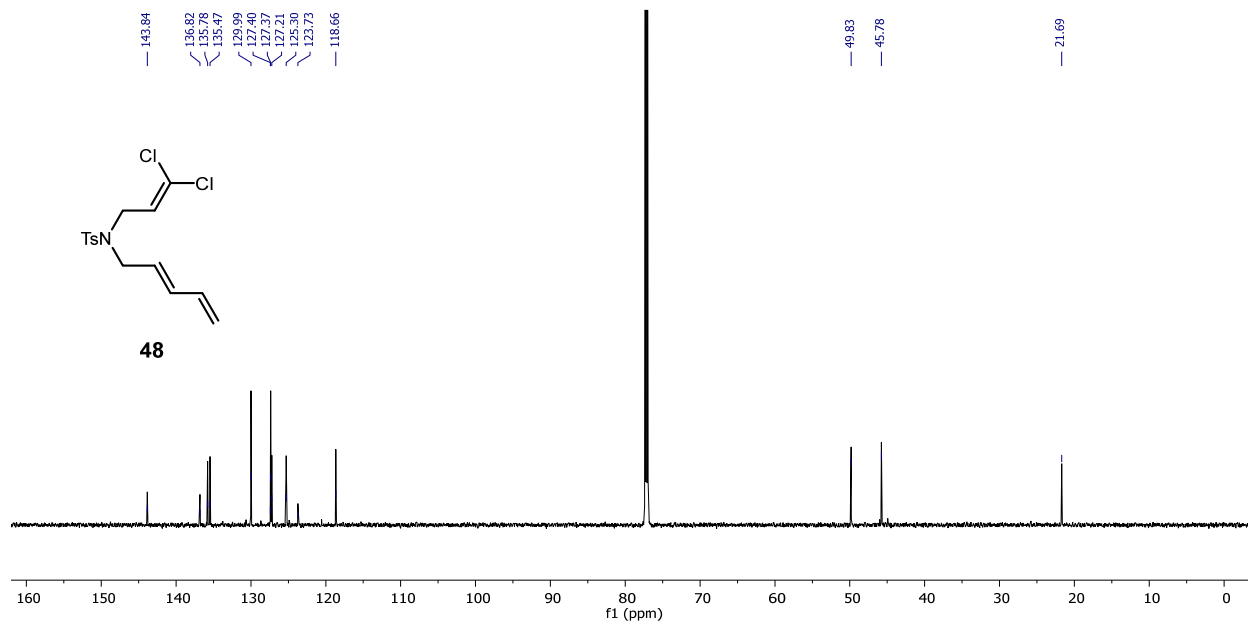

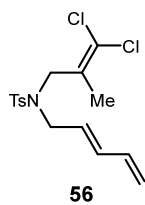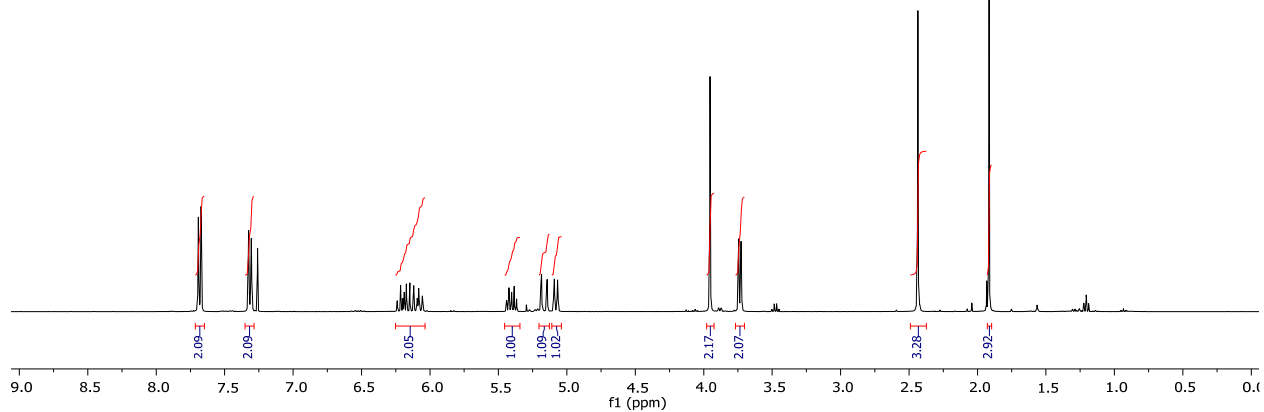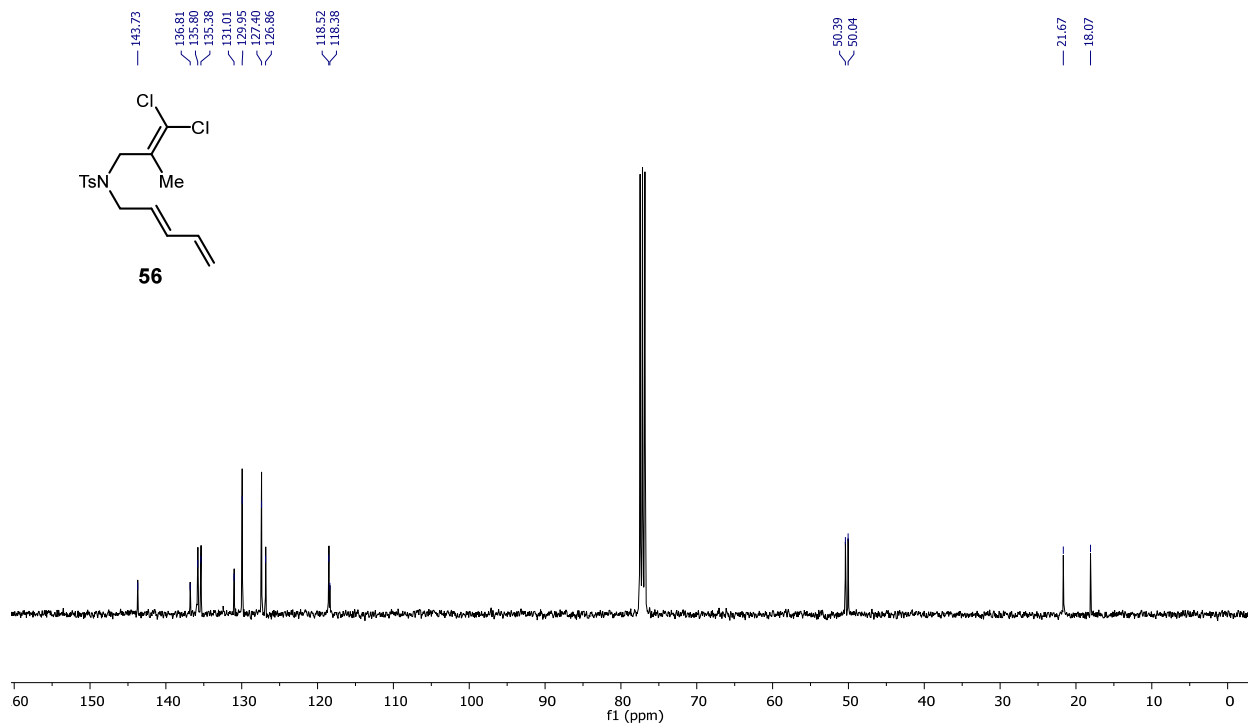

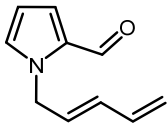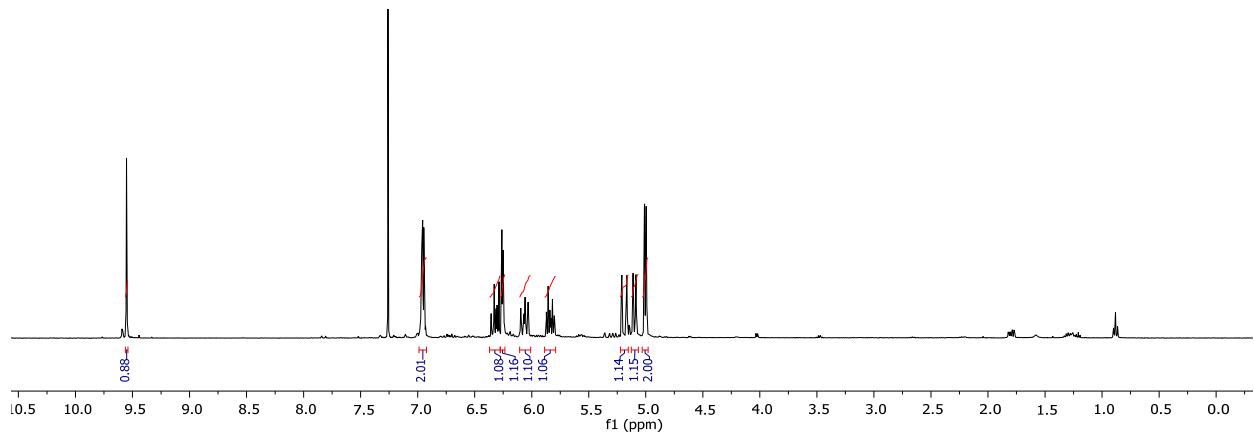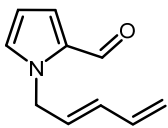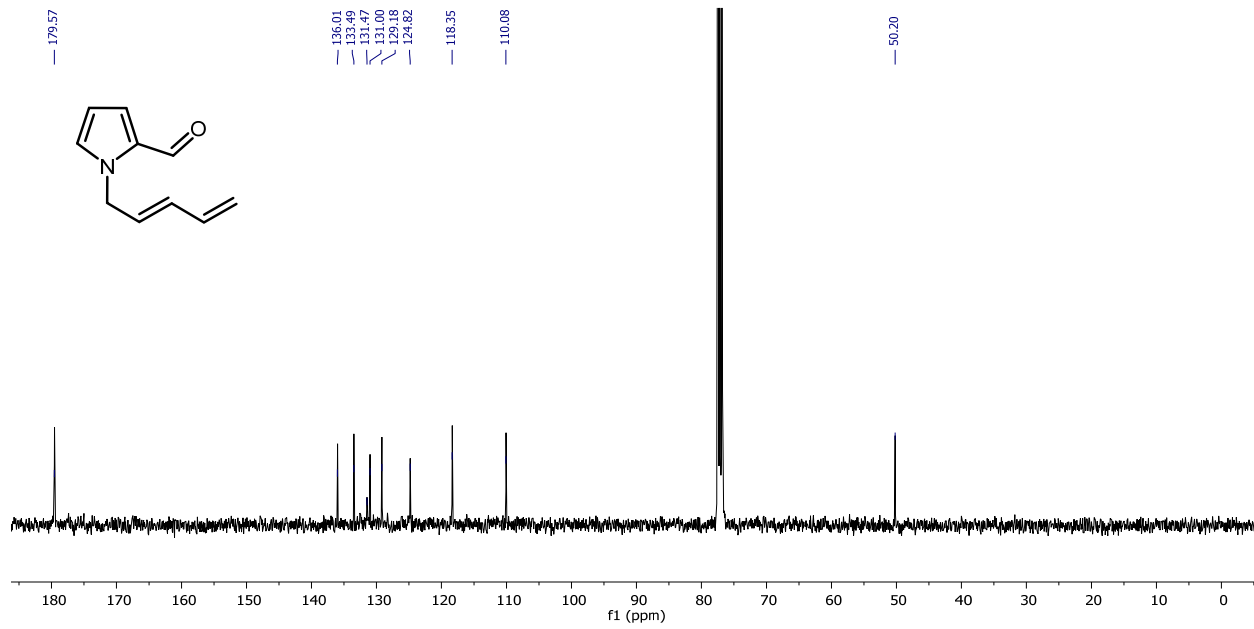

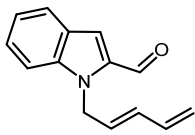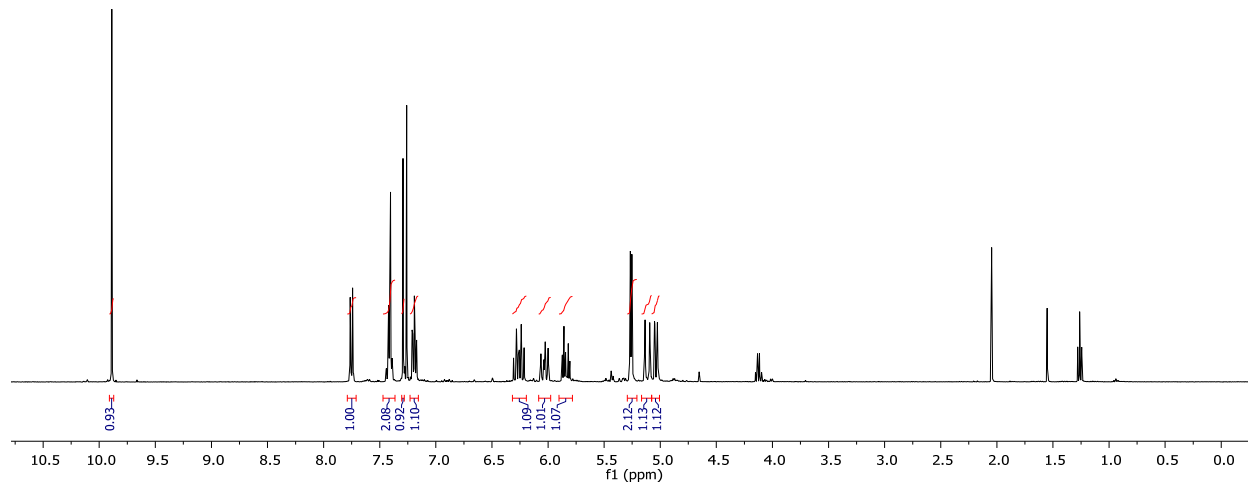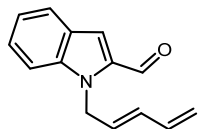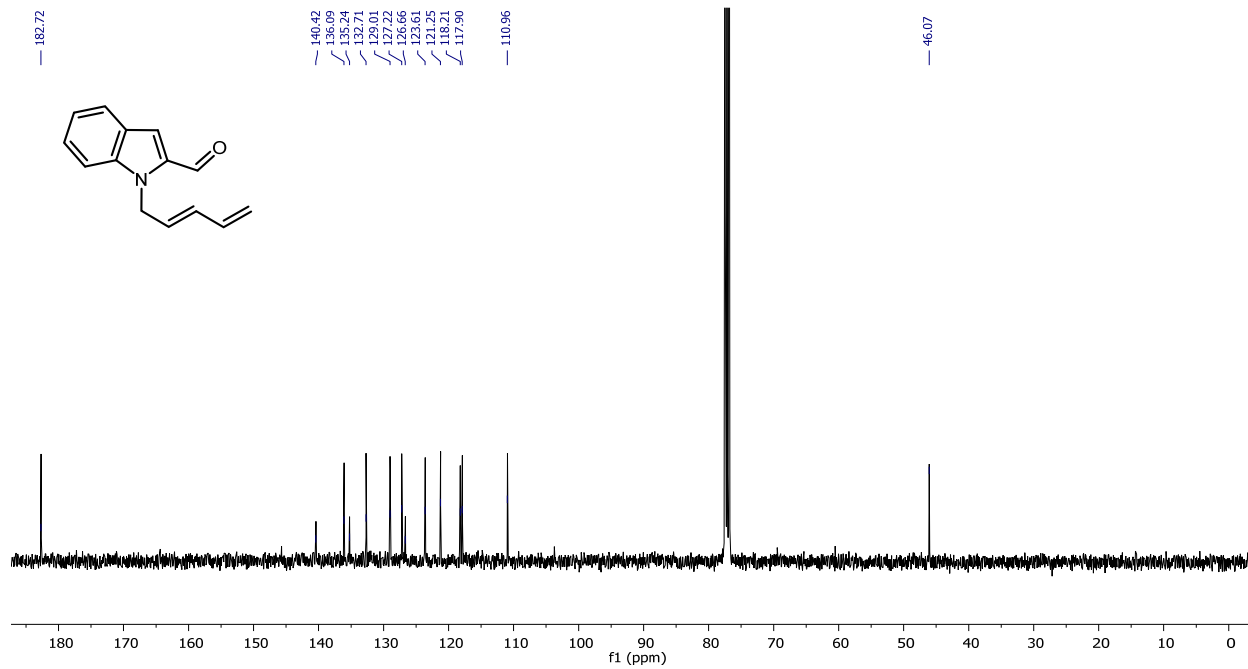

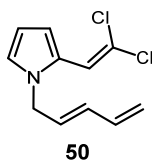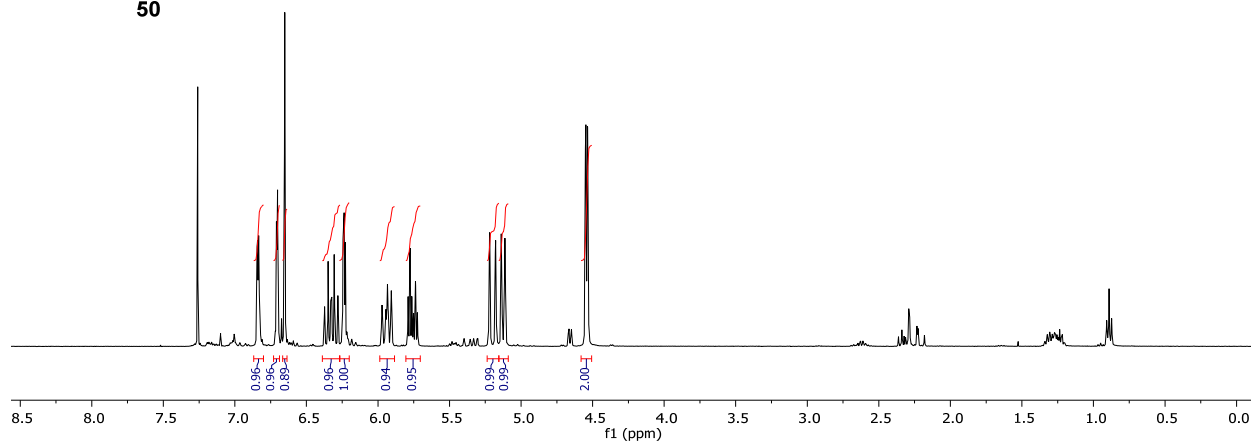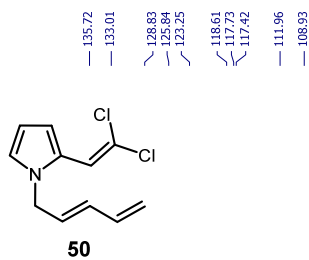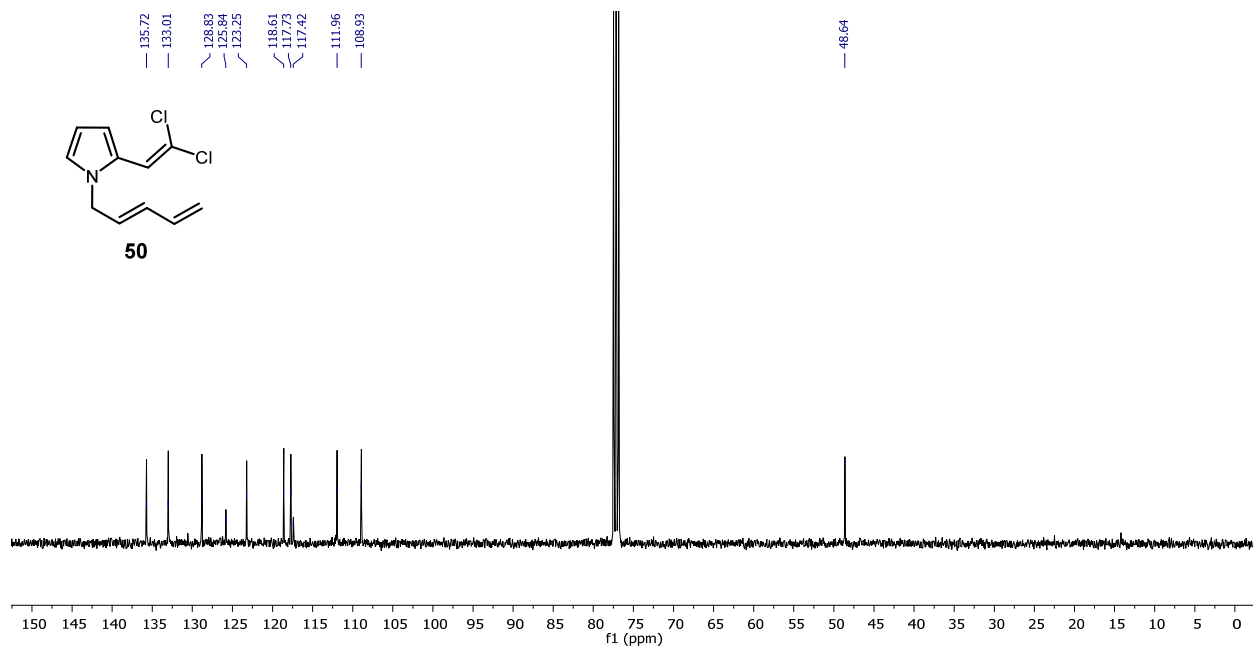

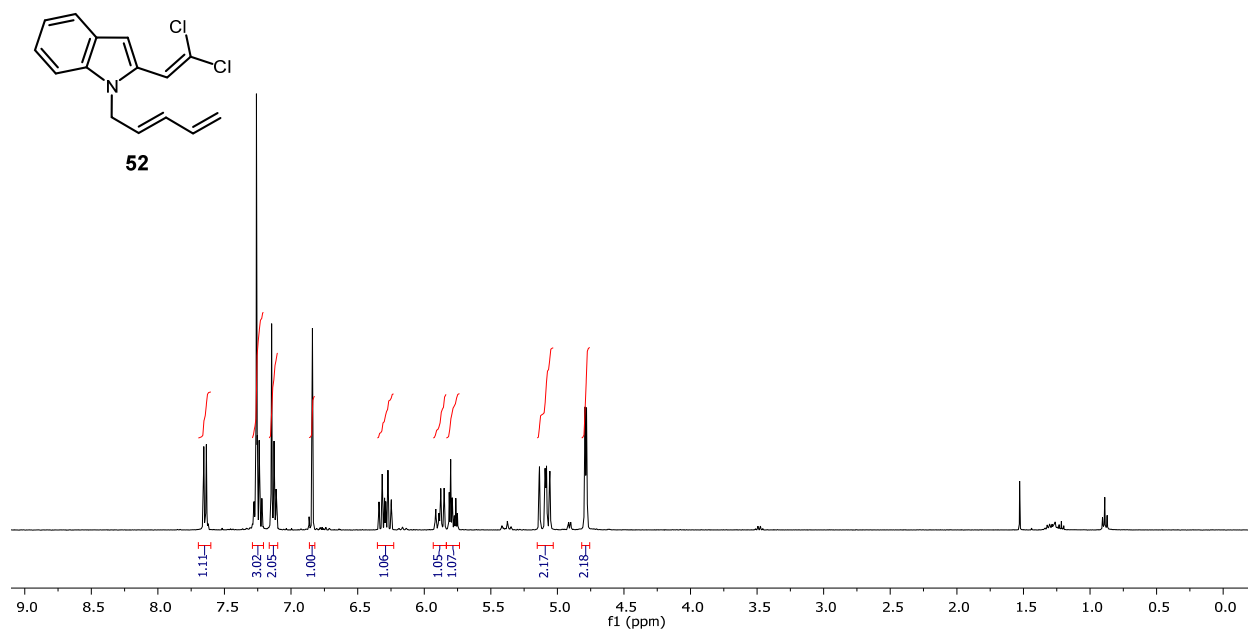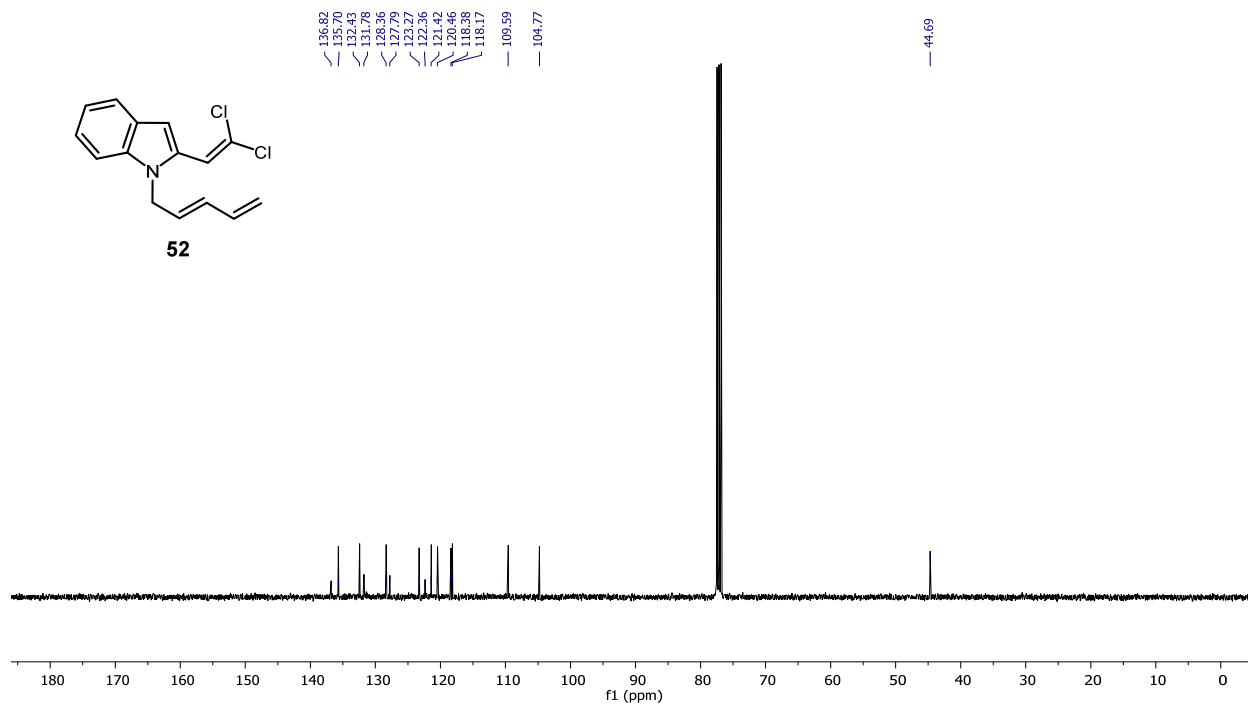

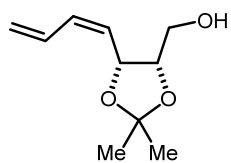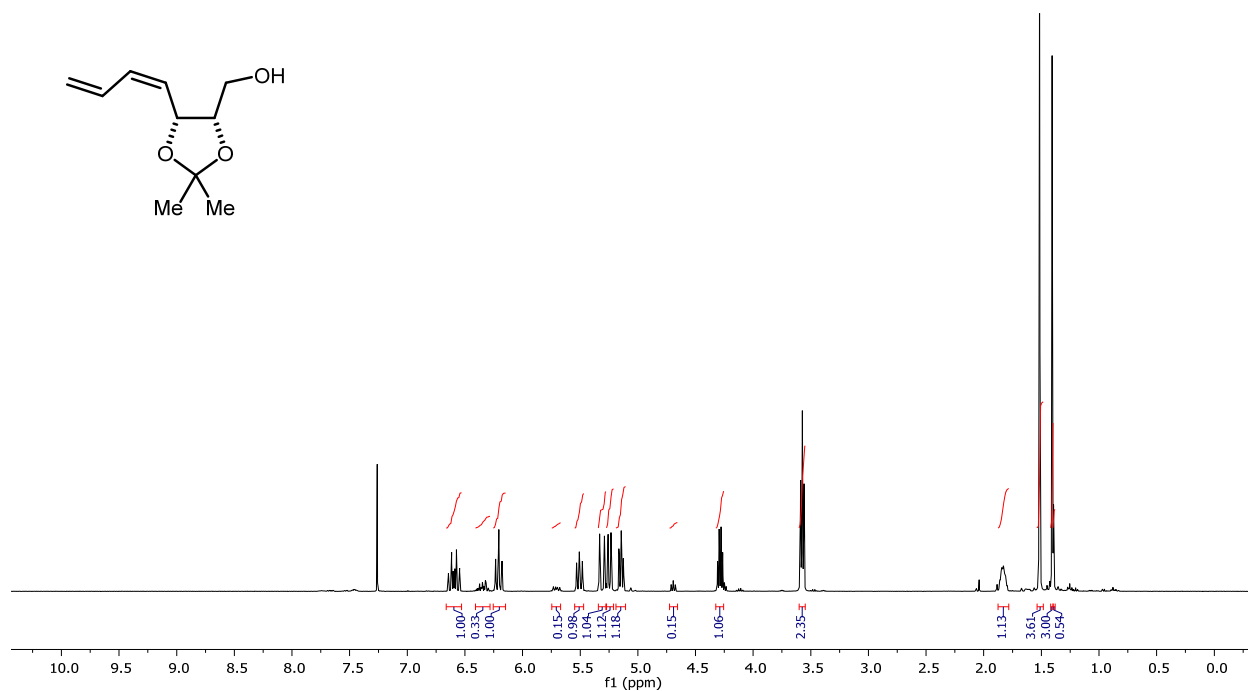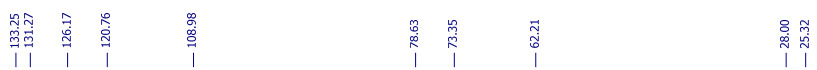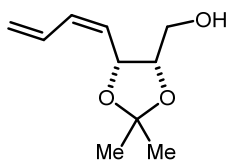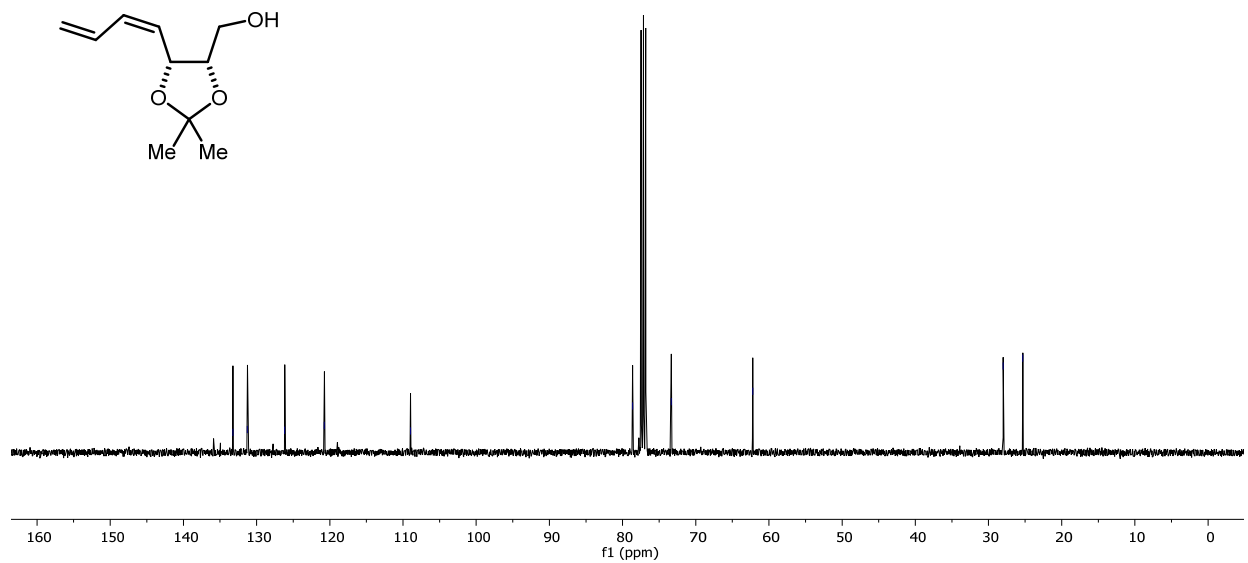

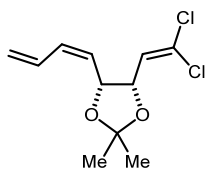

**54**

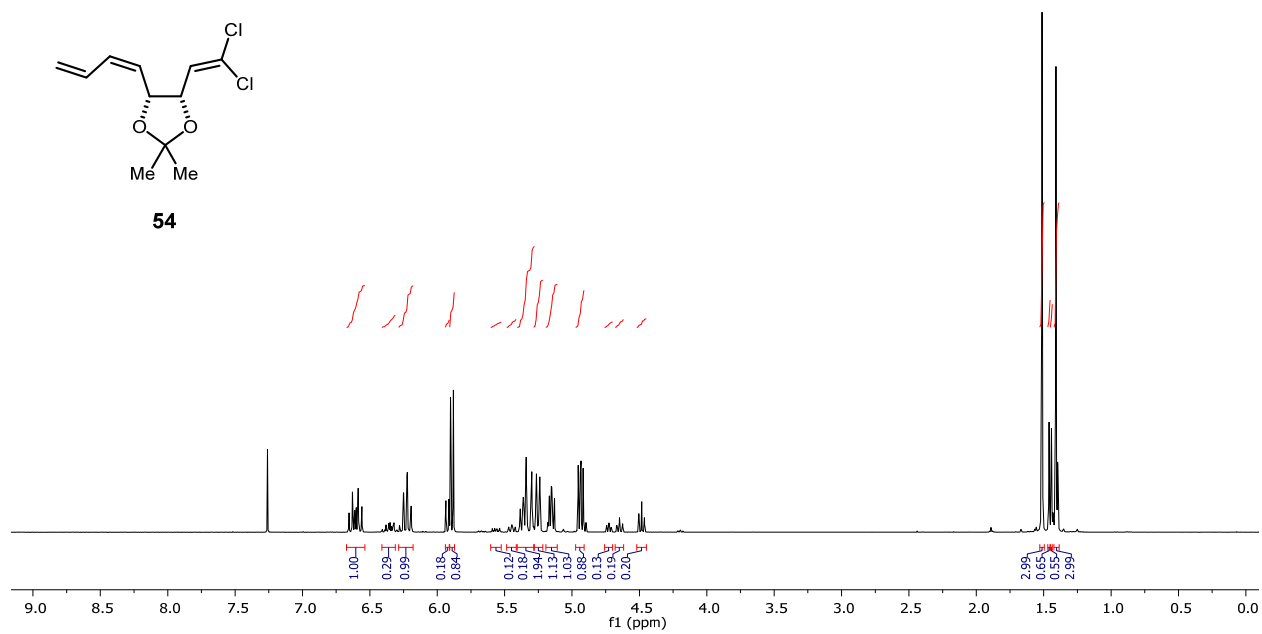

133.92  
131.34  
126.78  
125.27  
120.87  
106.64  
76.52  
74.43  
28.25  
25.69

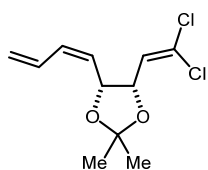

**54**

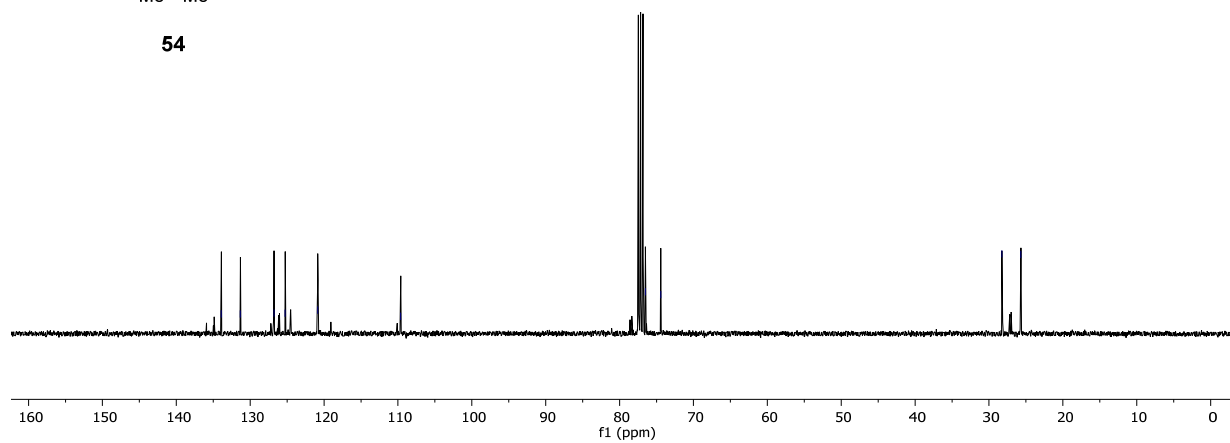



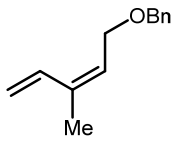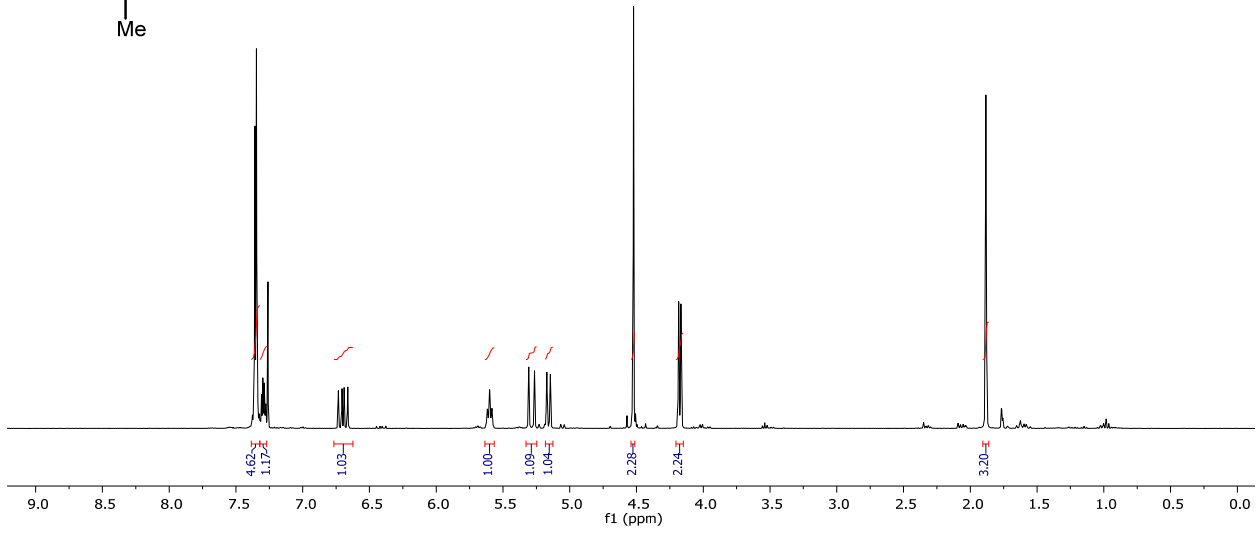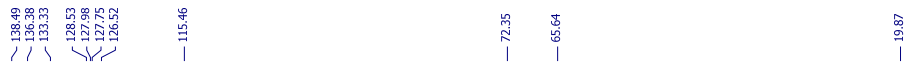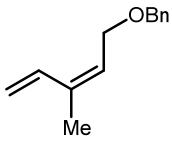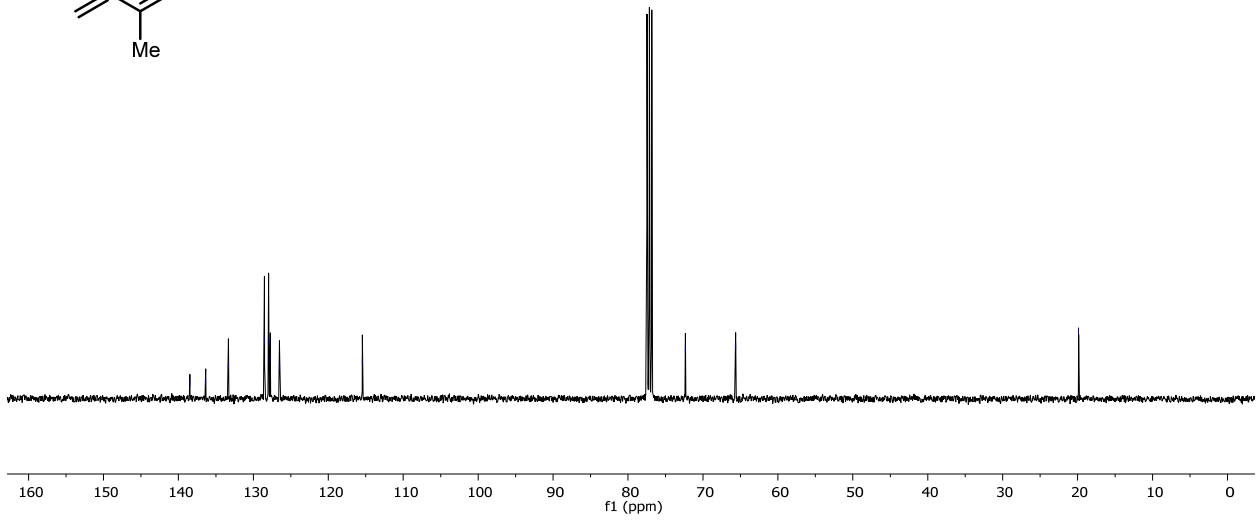

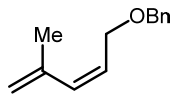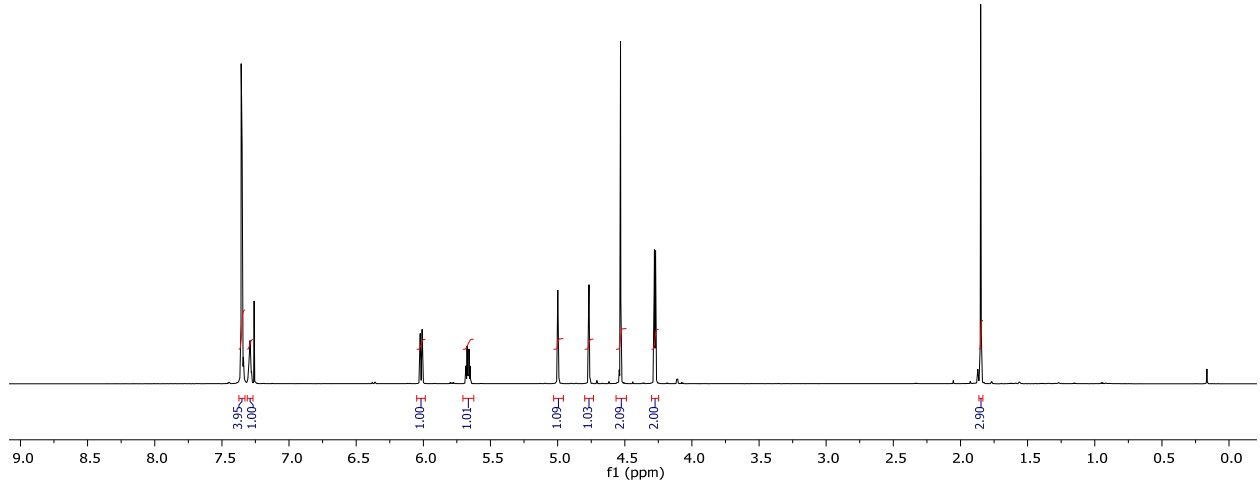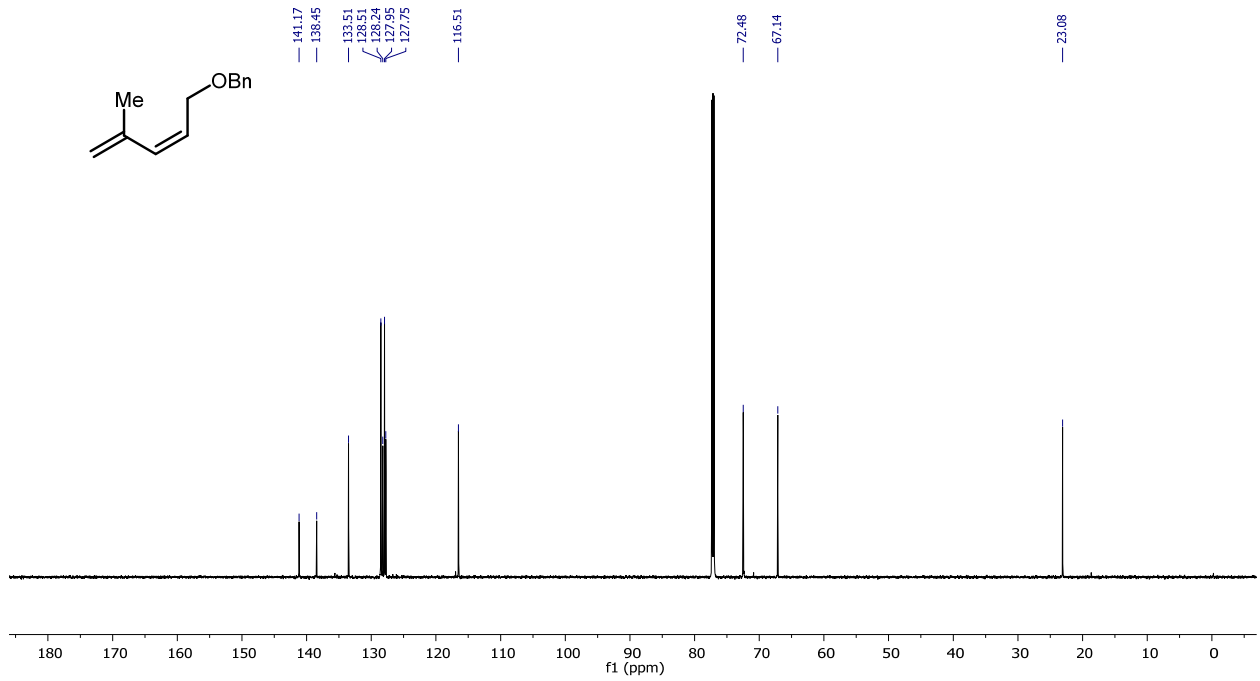

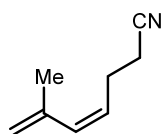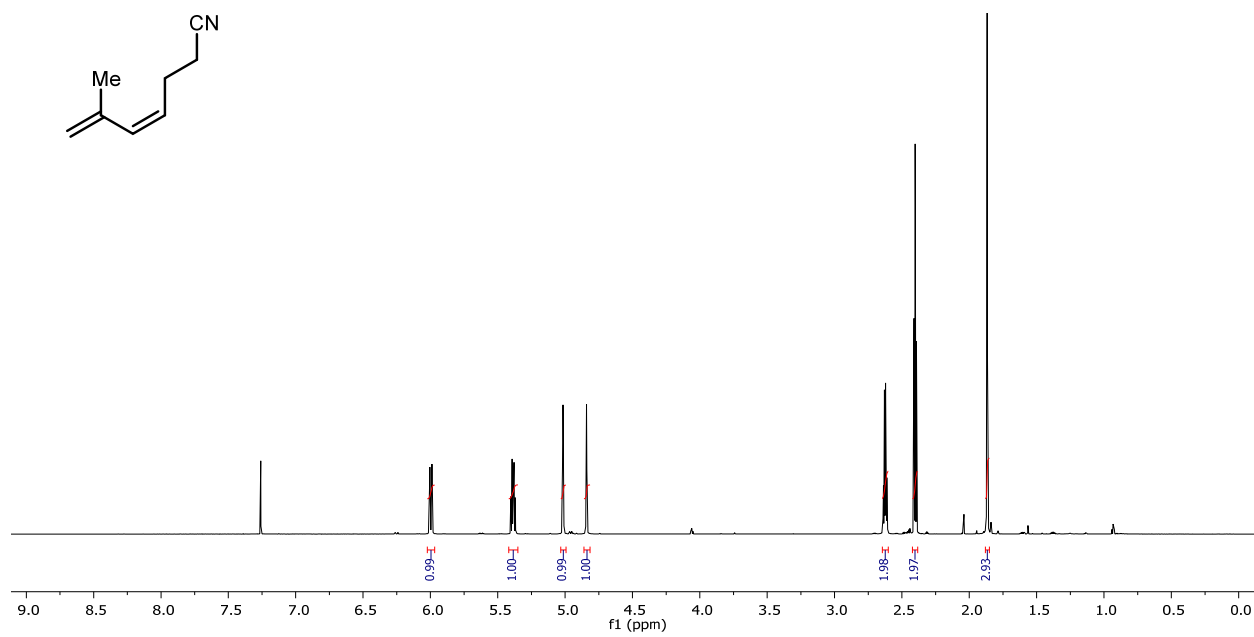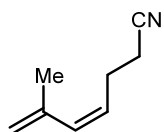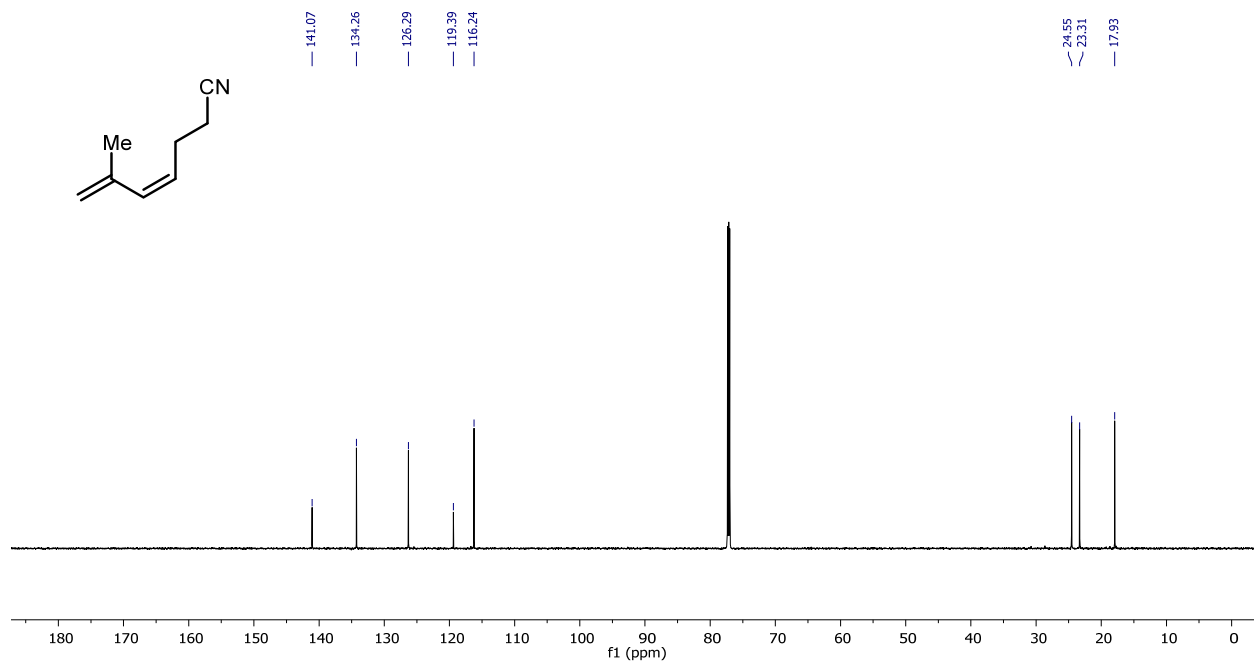

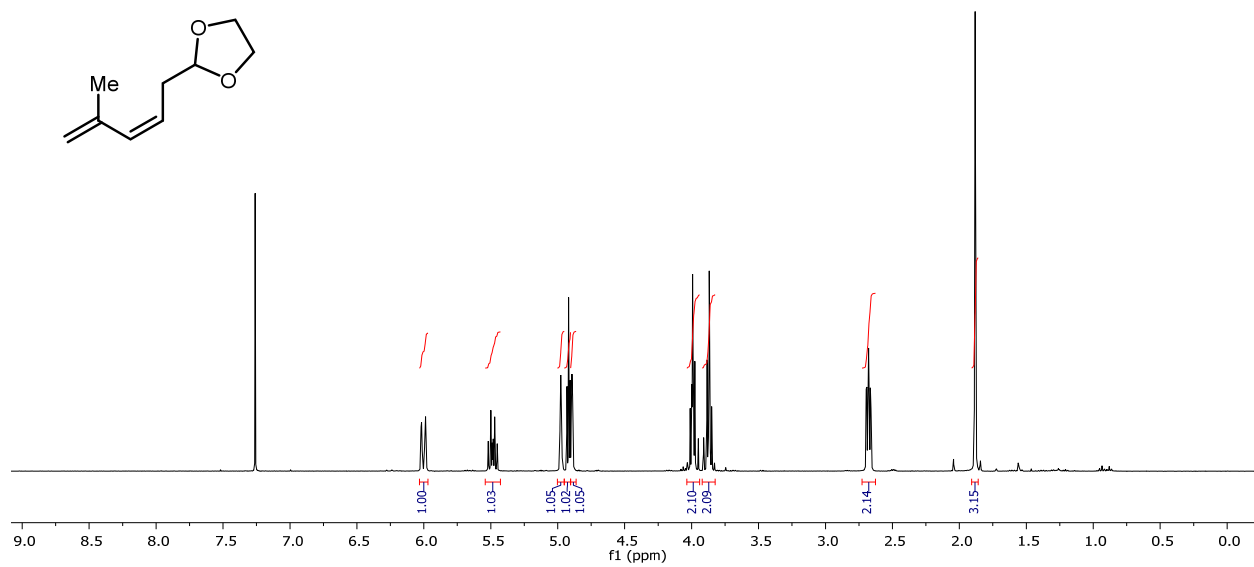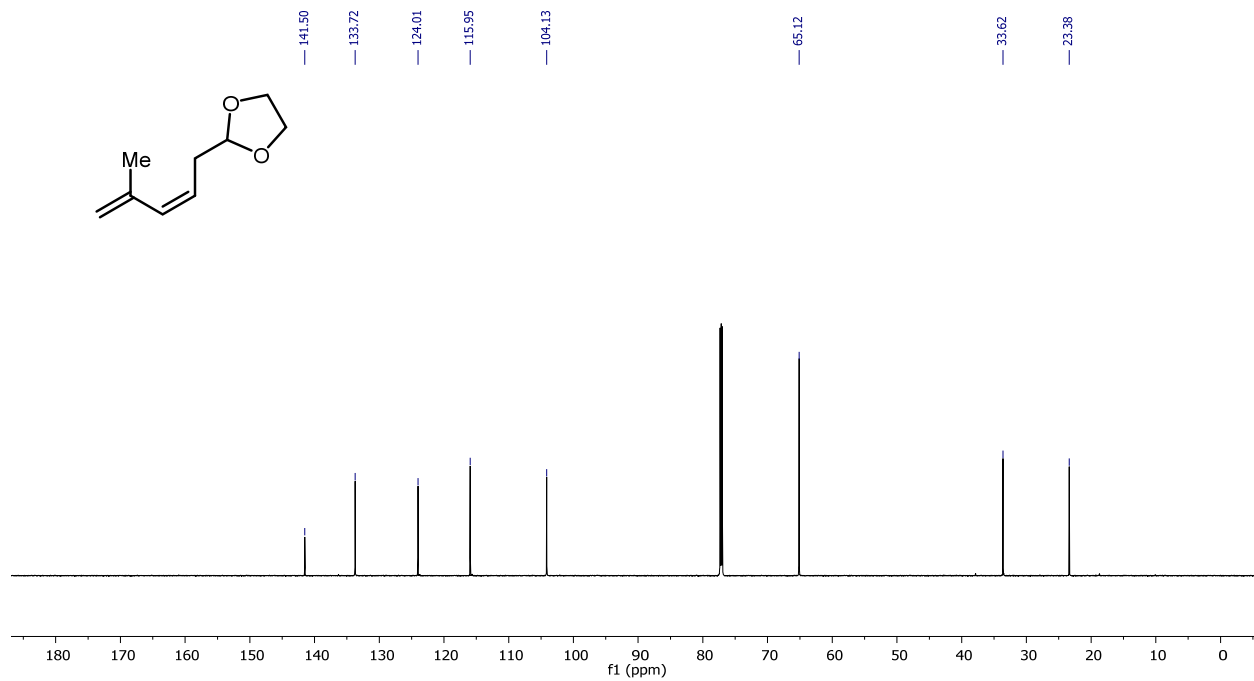

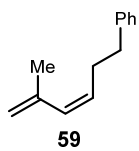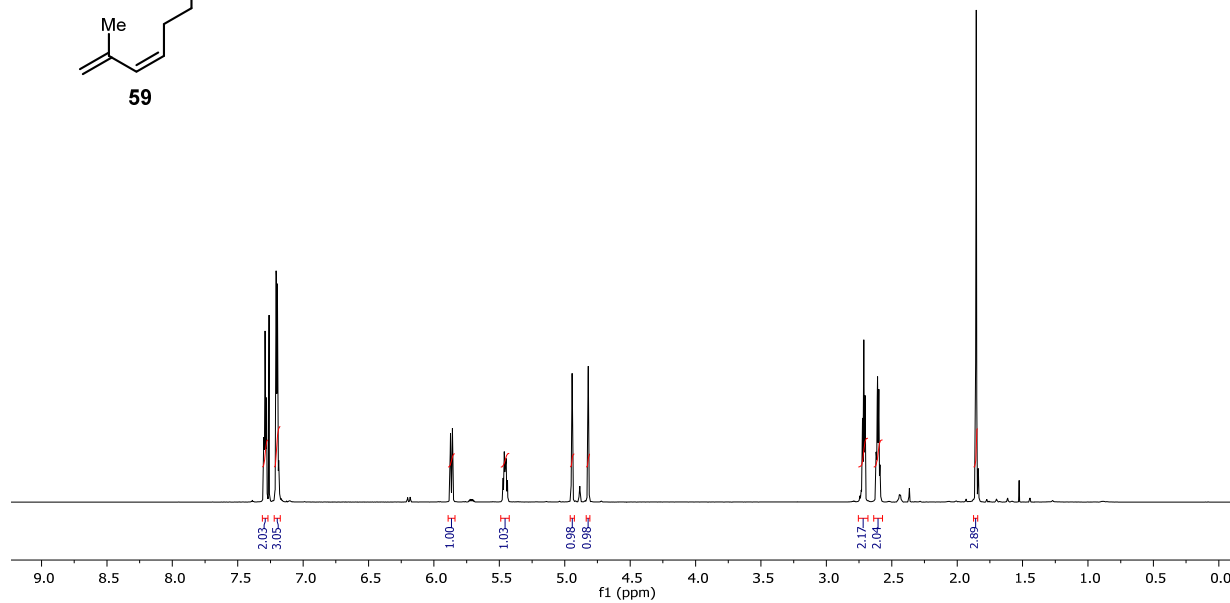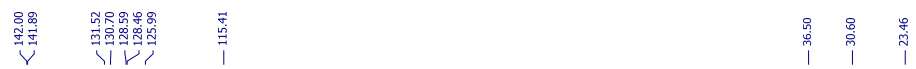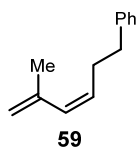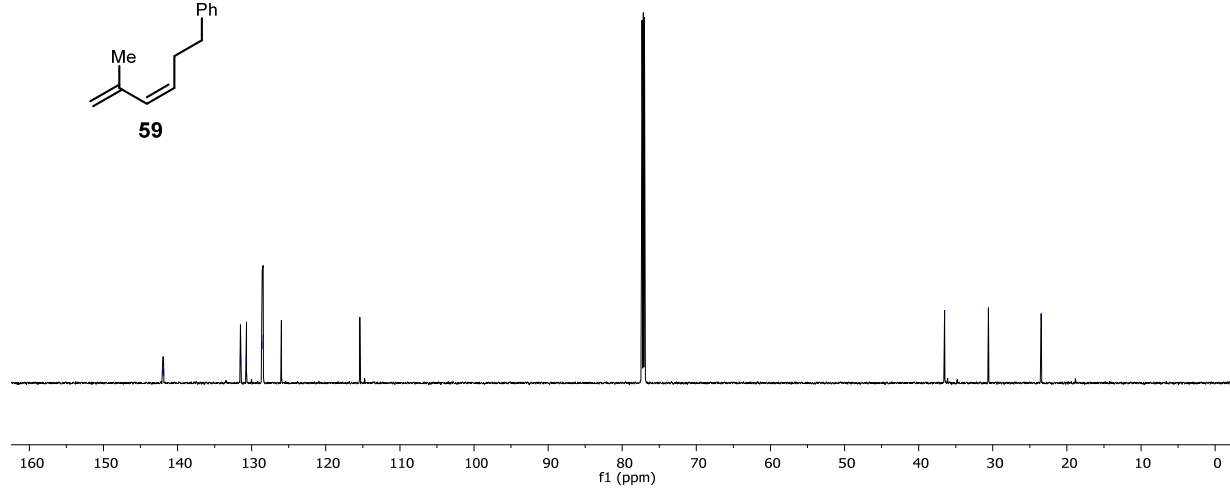

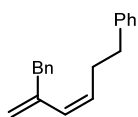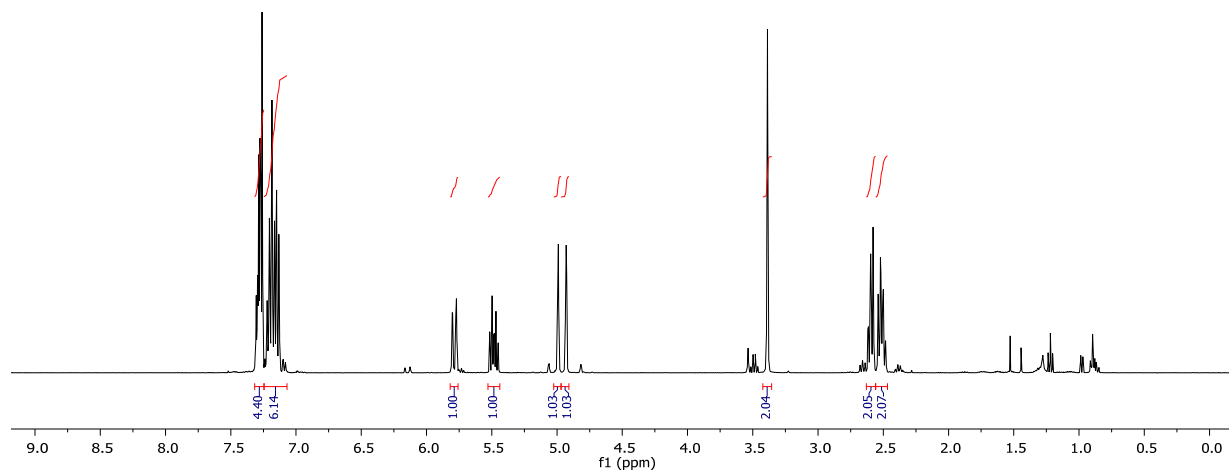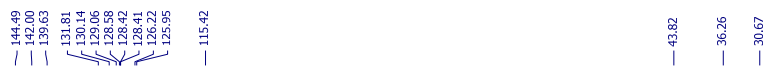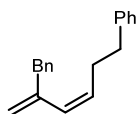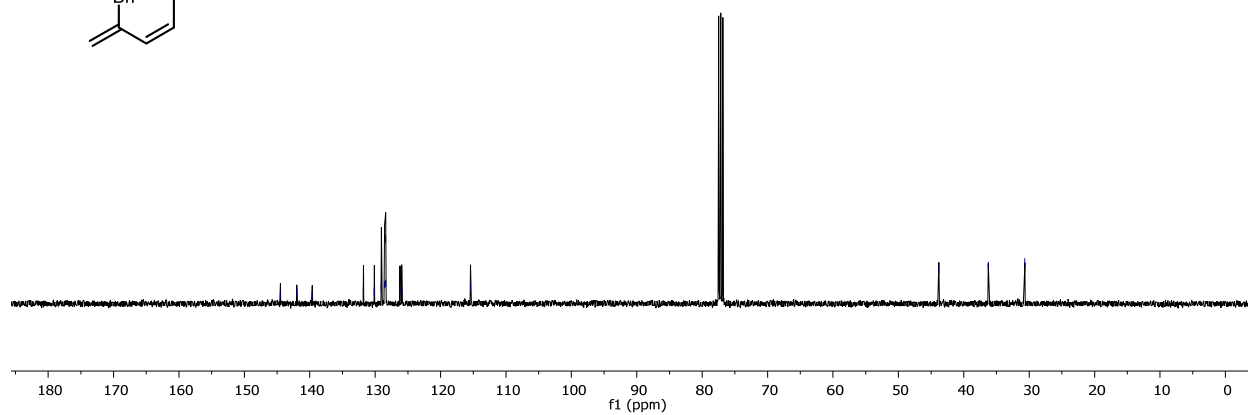

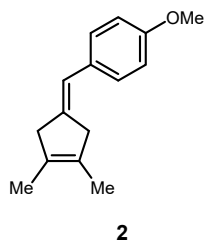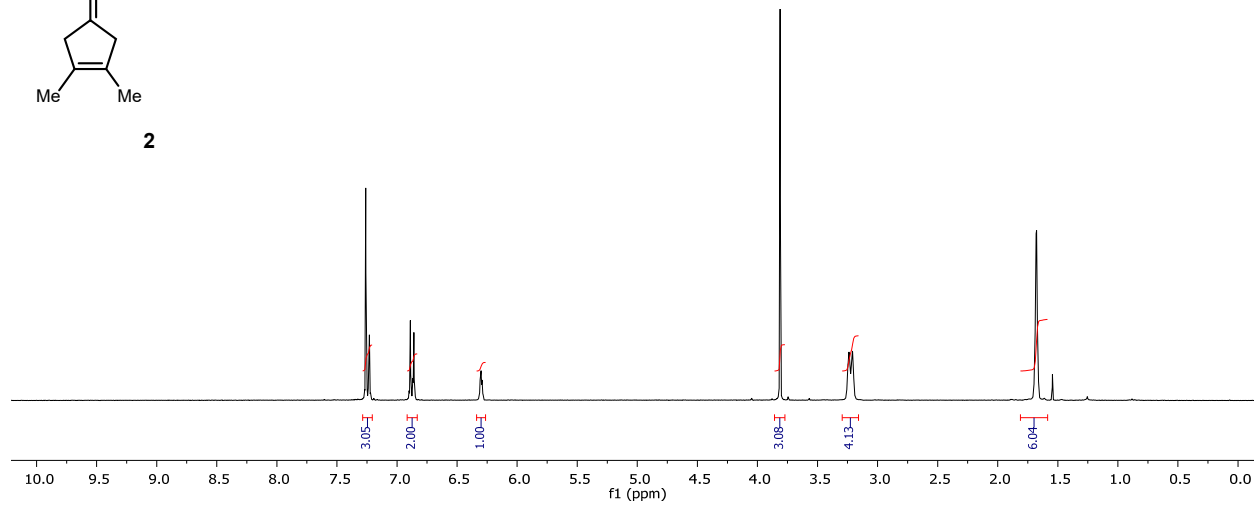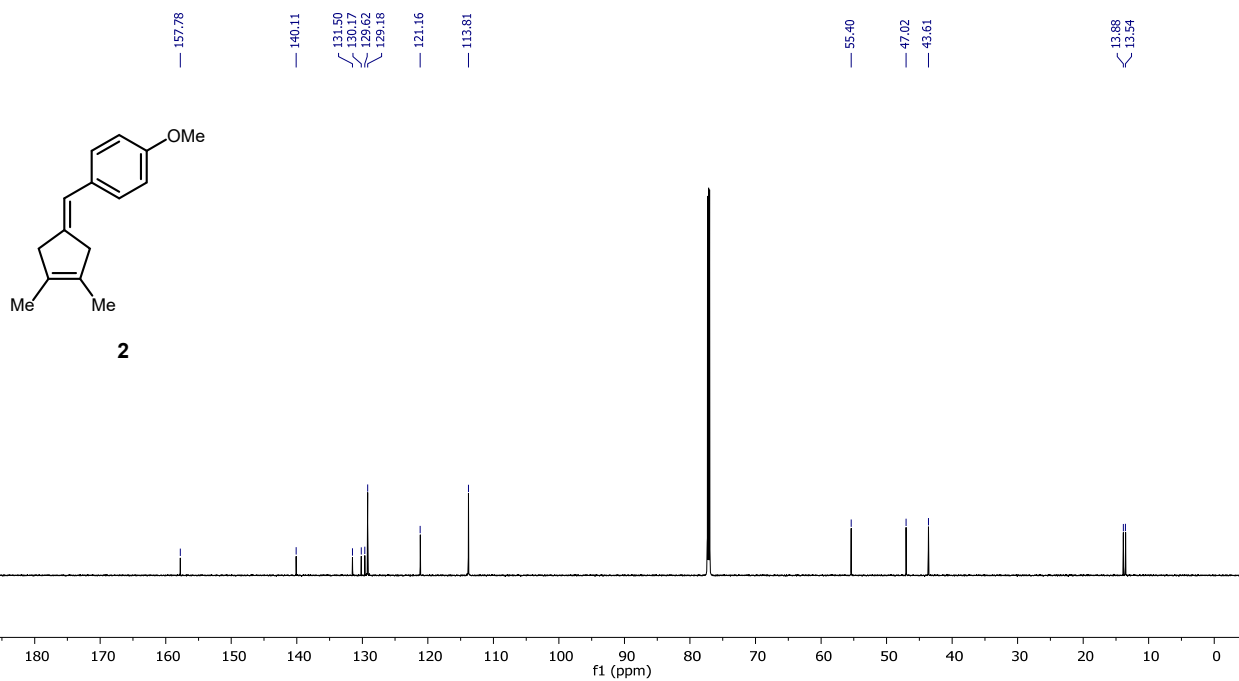

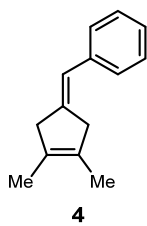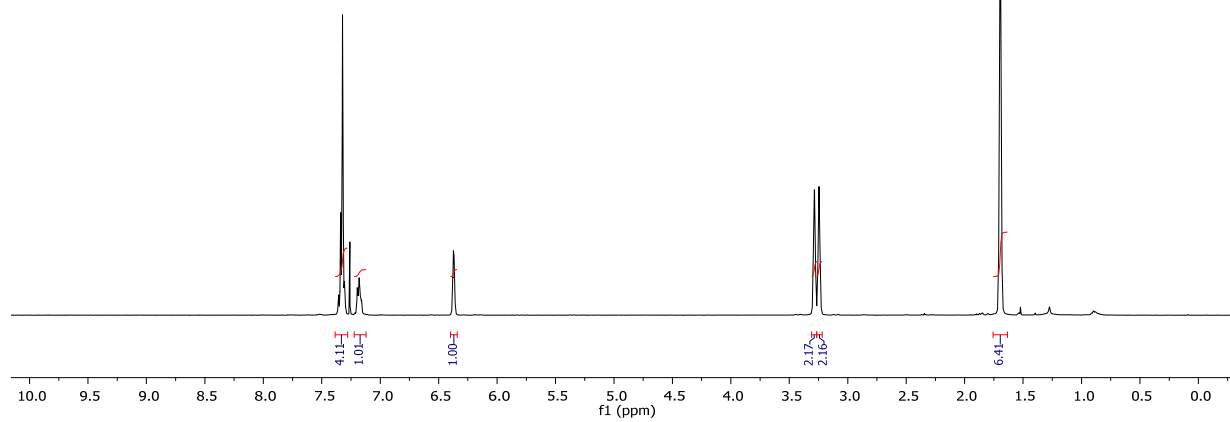

142.52  
138.57  
130.16  
129.51  
128.35  
128.07  
125.89  
121.85  
47.12  
43.70  
13.85  
13.52

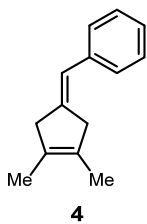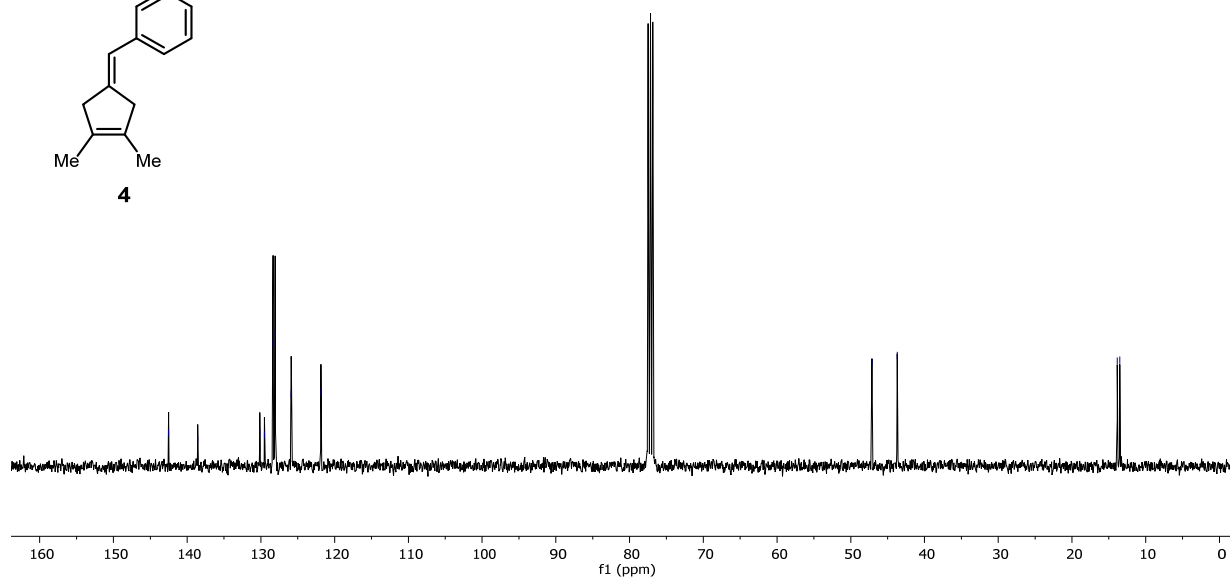



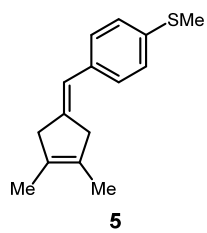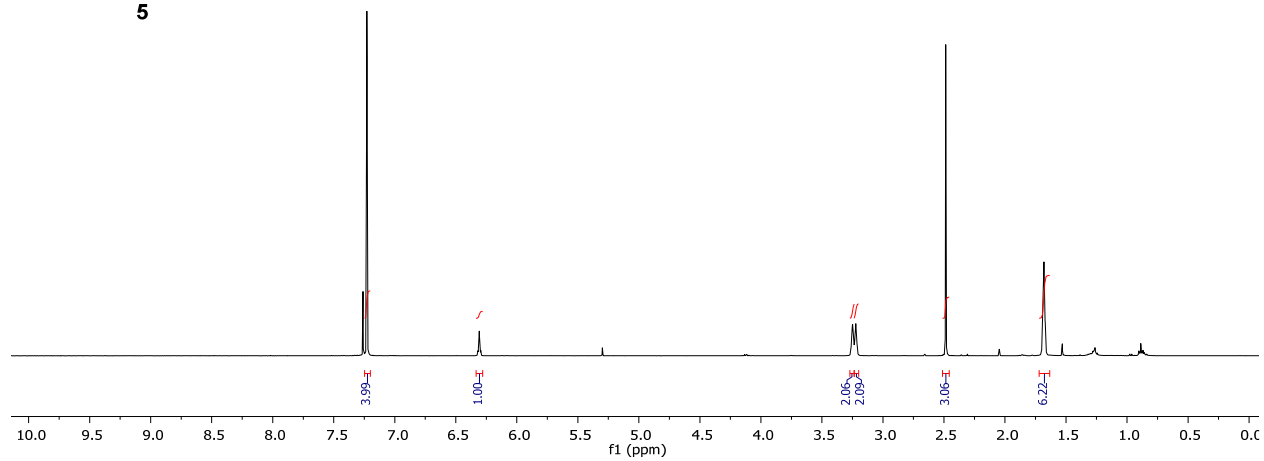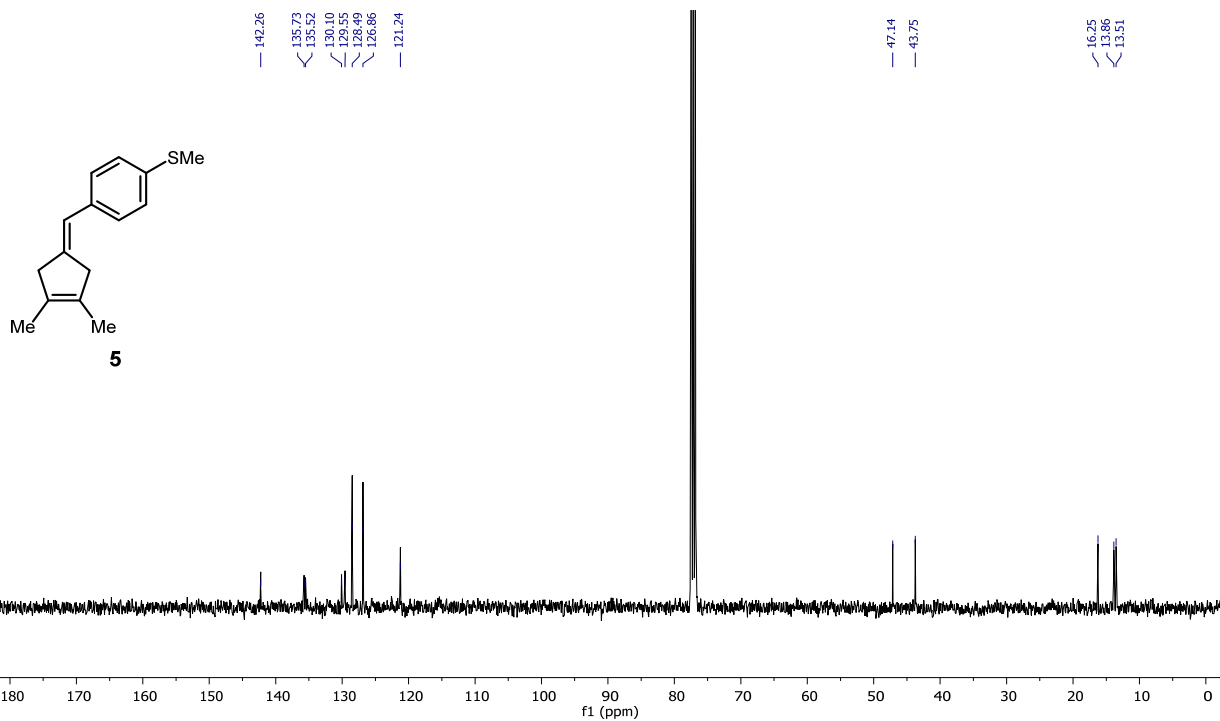

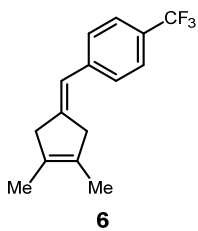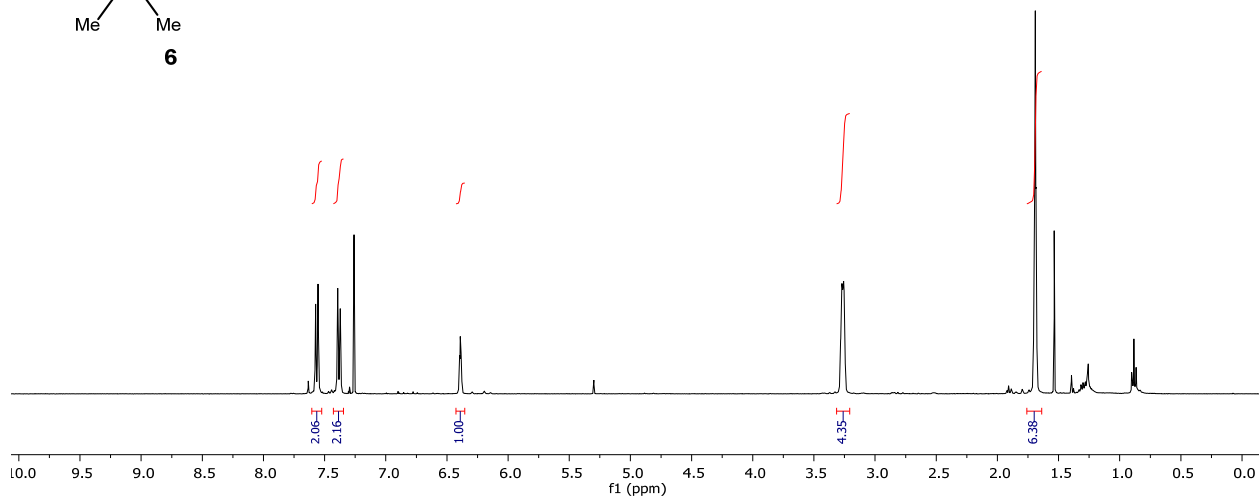

145.79  
 141.98  
 129.95  
 129.51  
 129.04  
 128.09  
 127.90  
 127.74  
 127.58  
 127.42  
 125.30  
 125.29  
 125.27  
 125.25  
 120.87

47.25  
 43.80

13.83  
 13.49

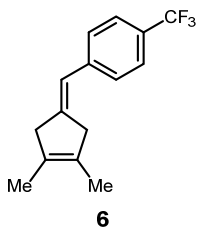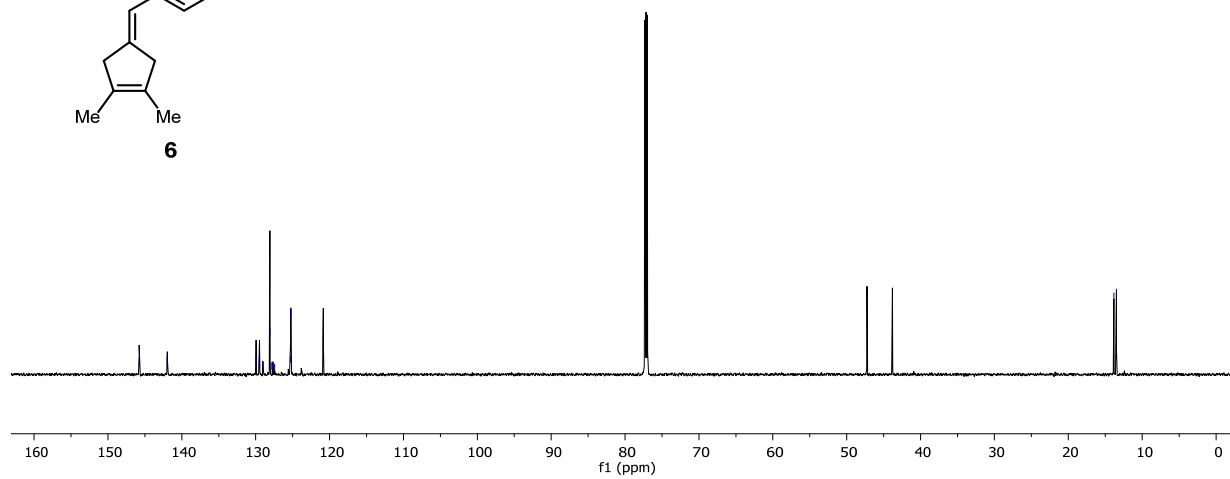

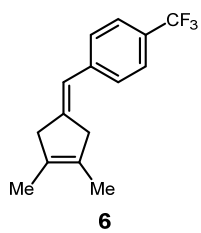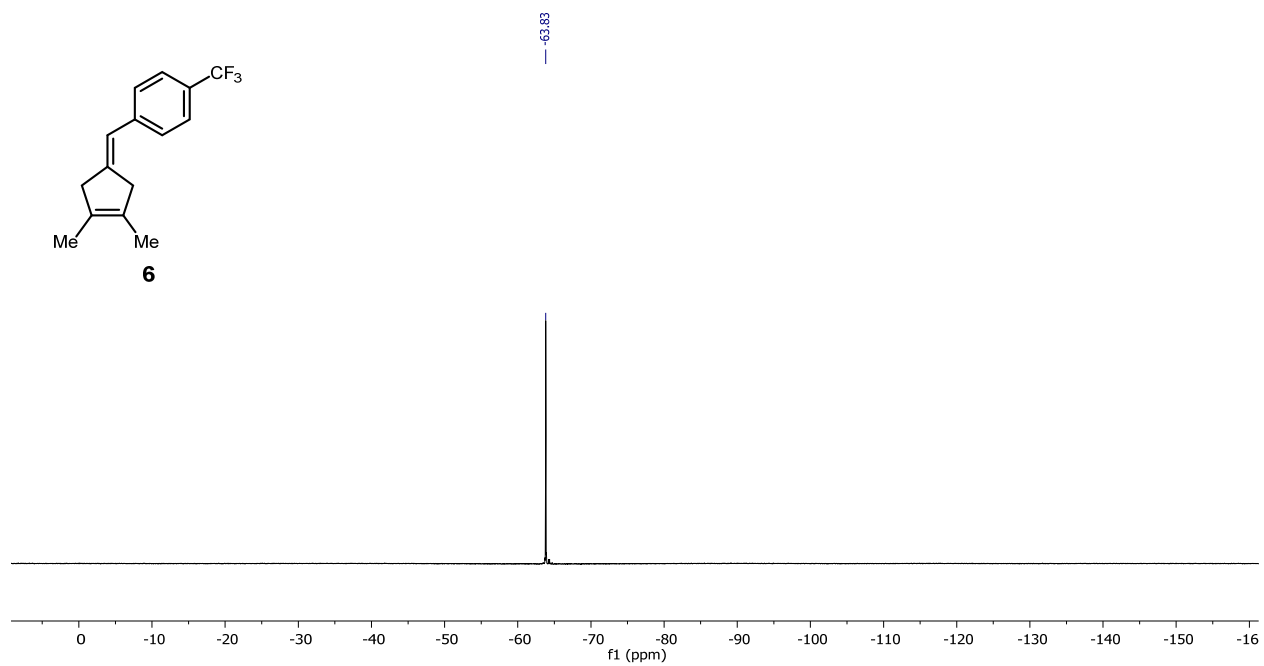

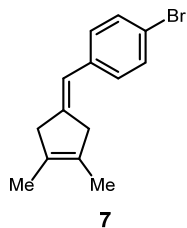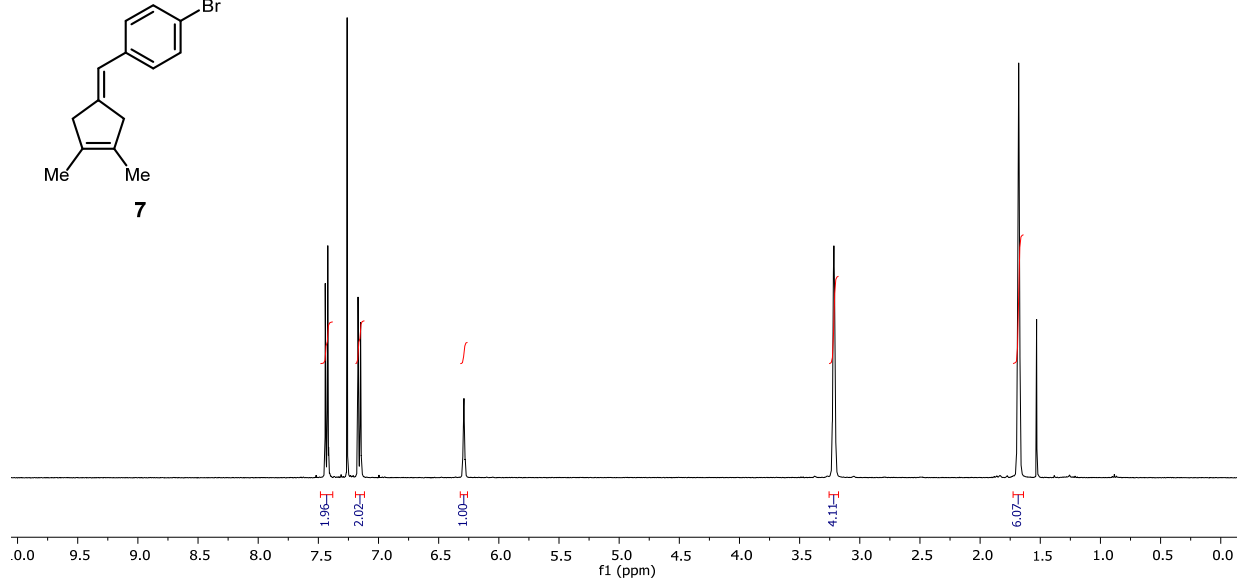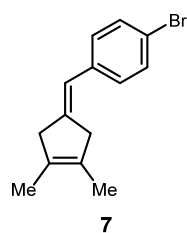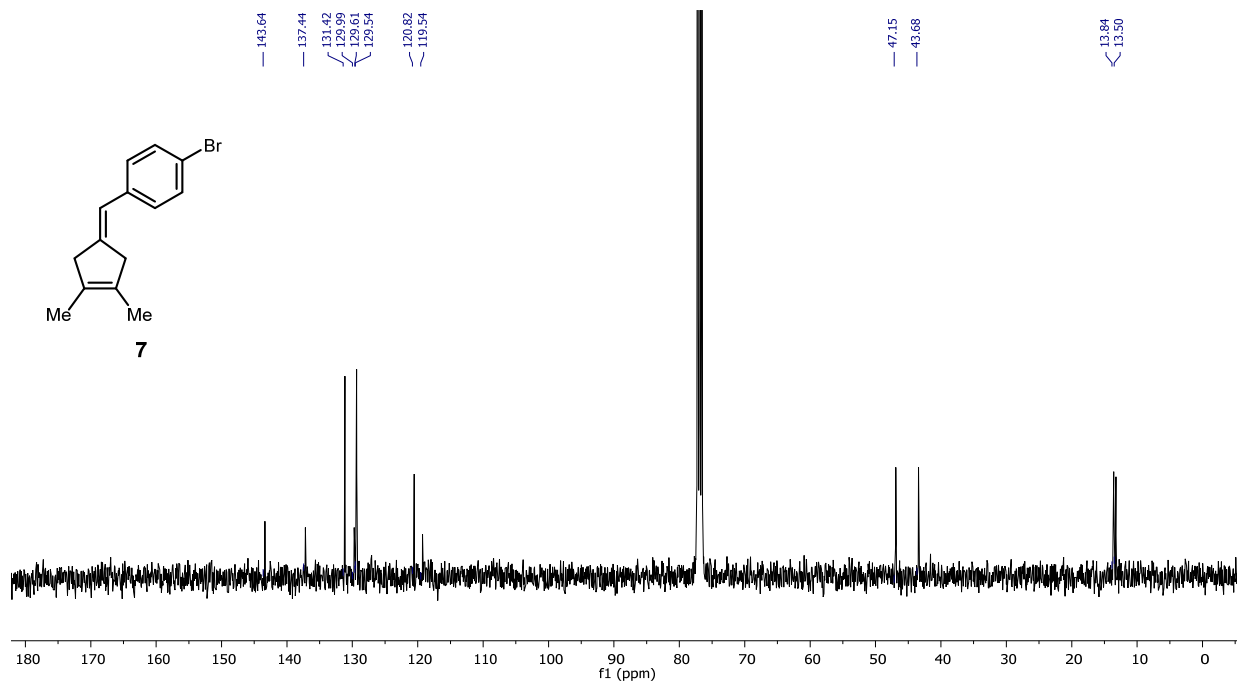

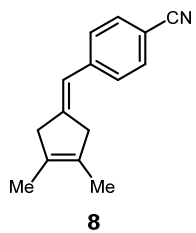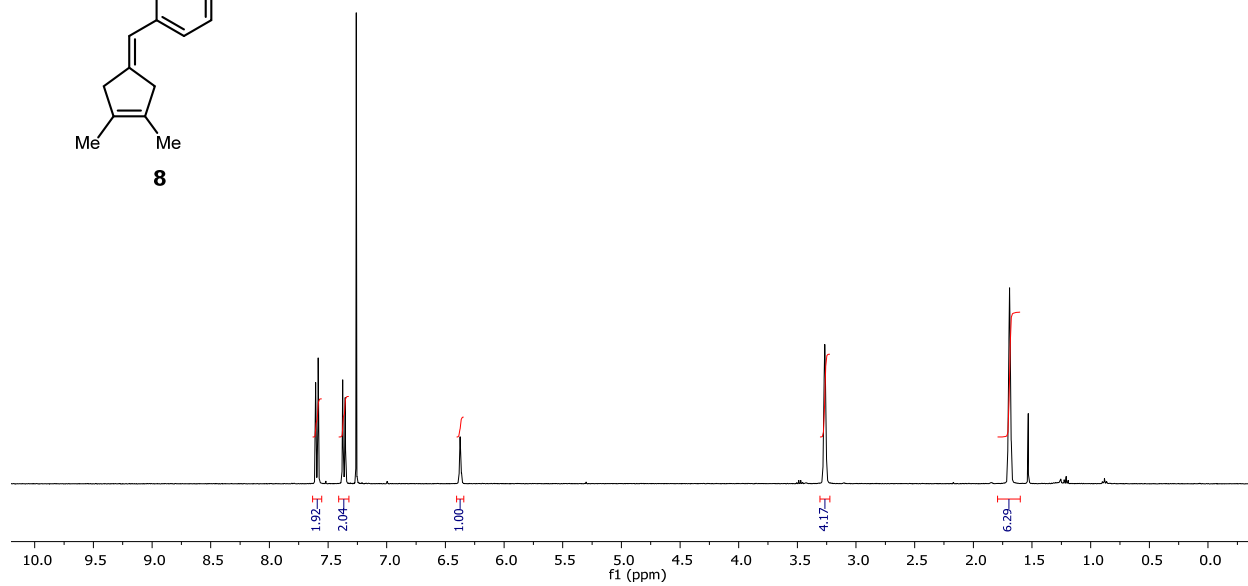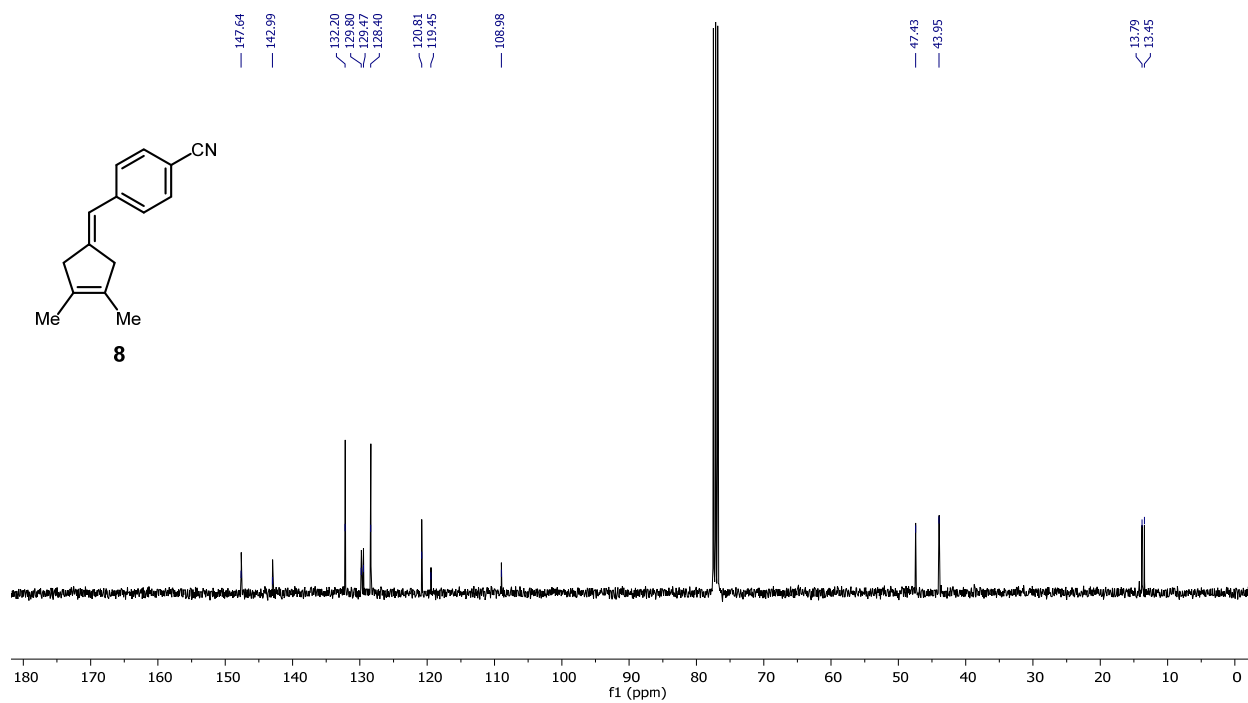

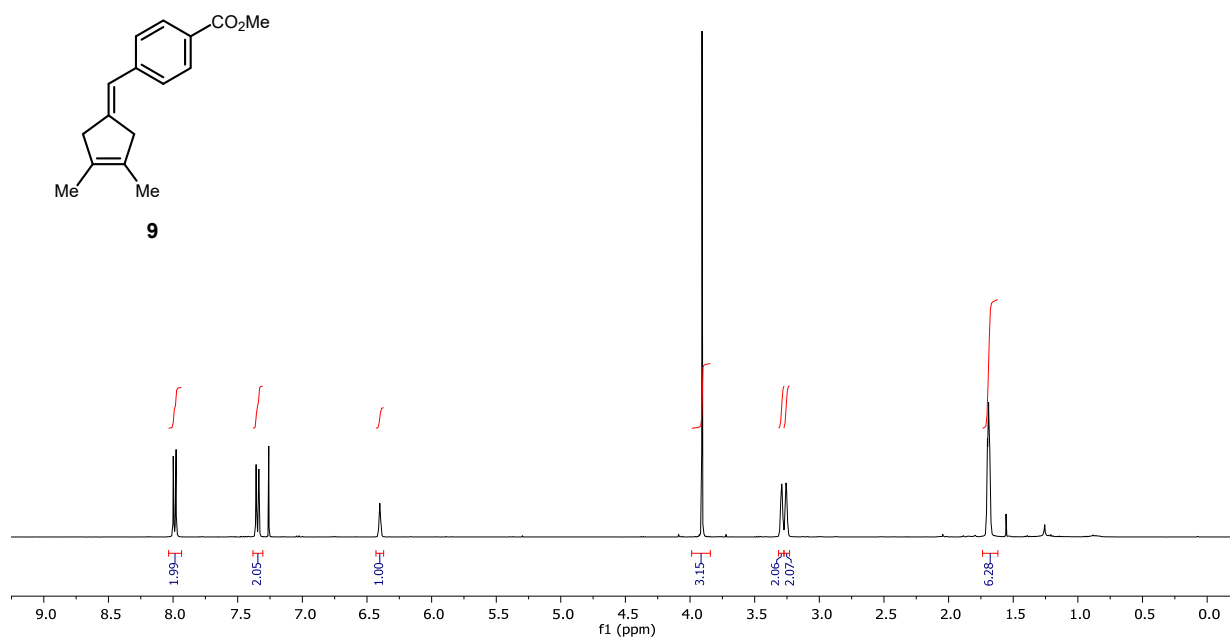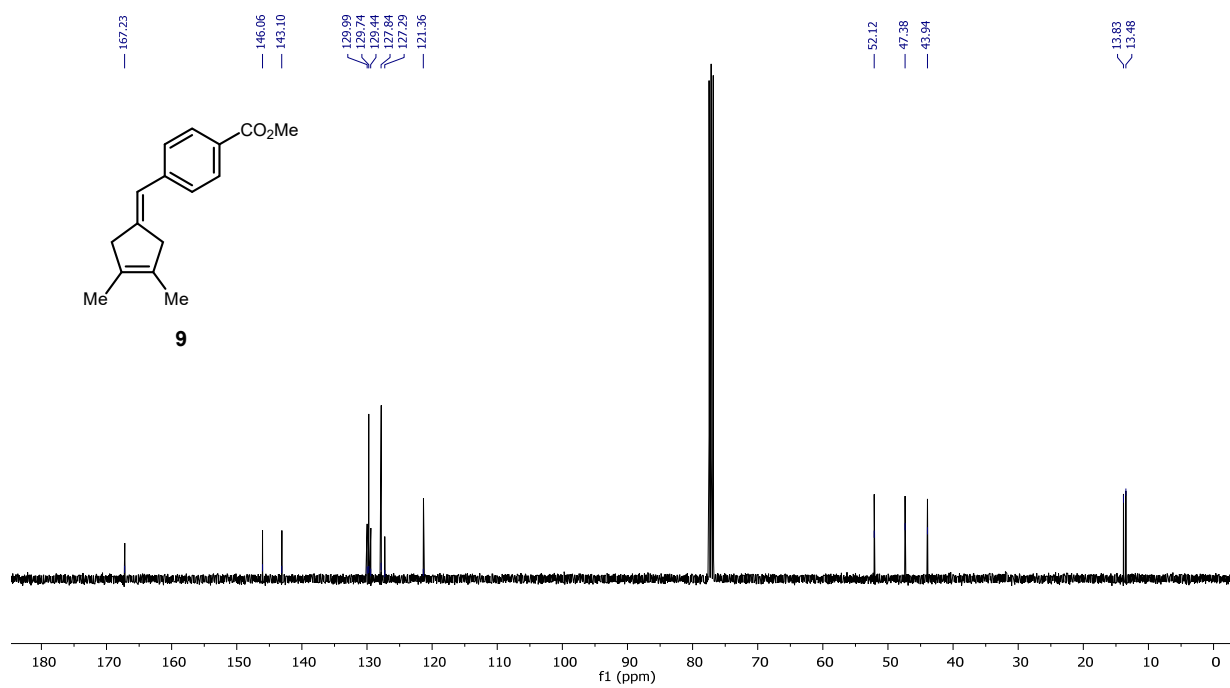

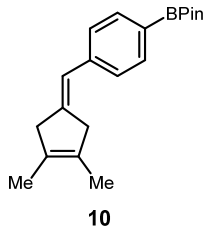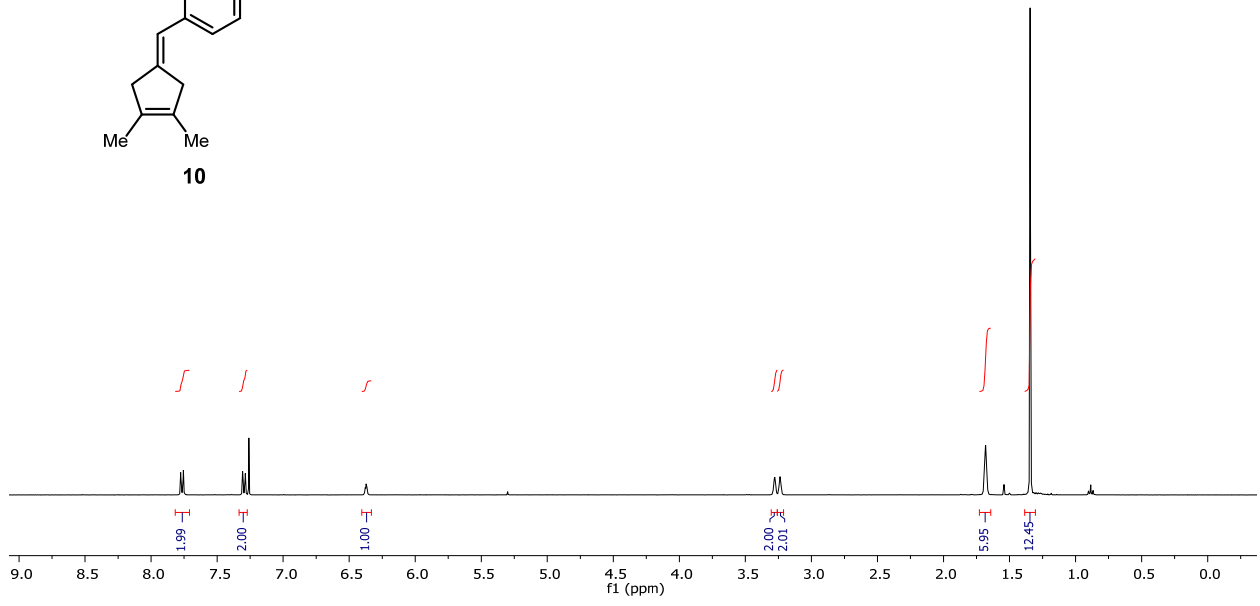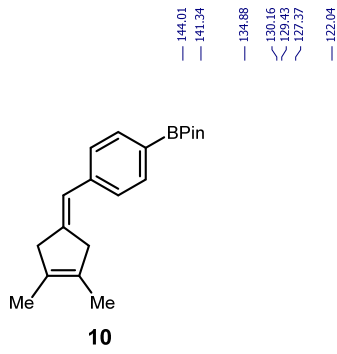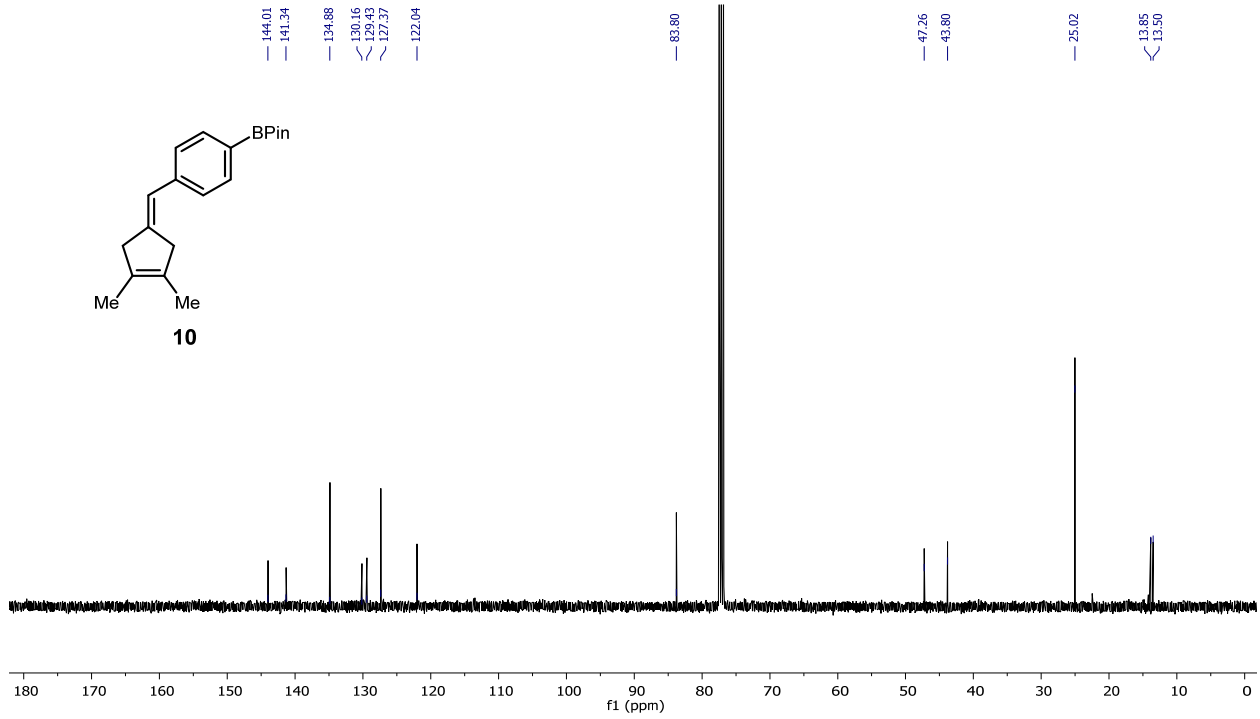

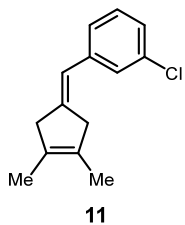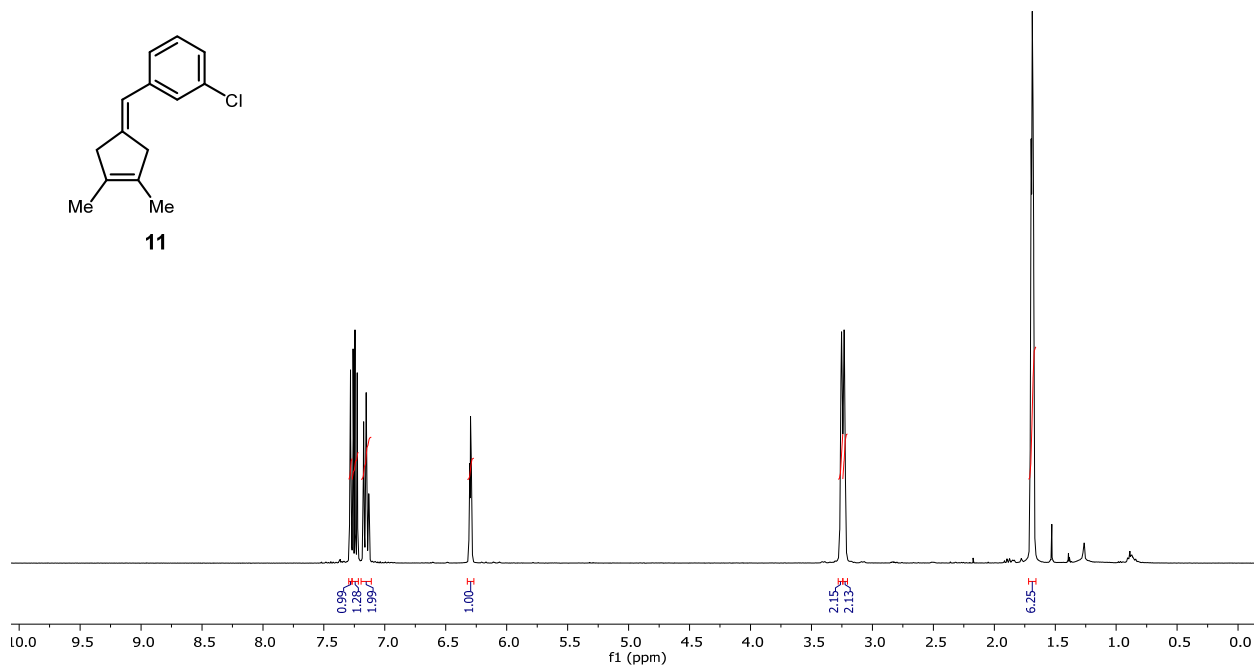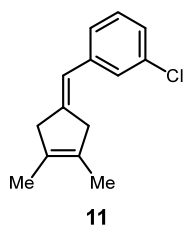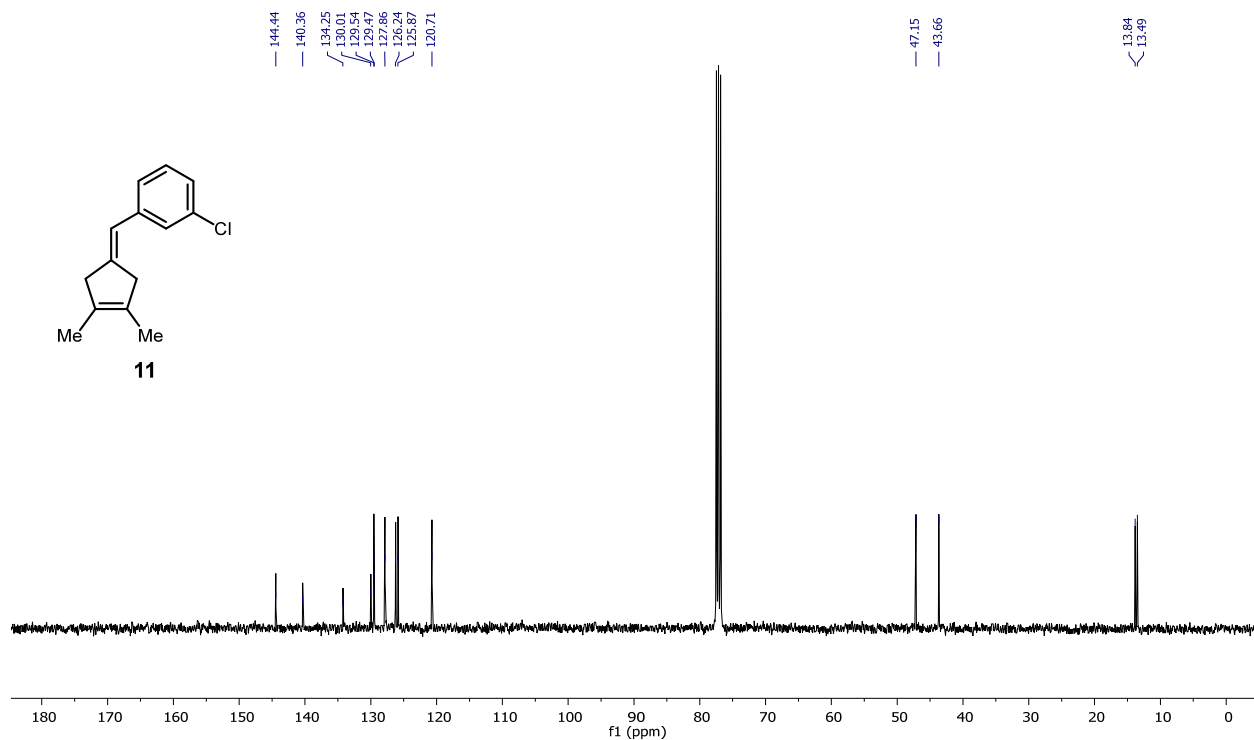



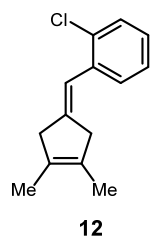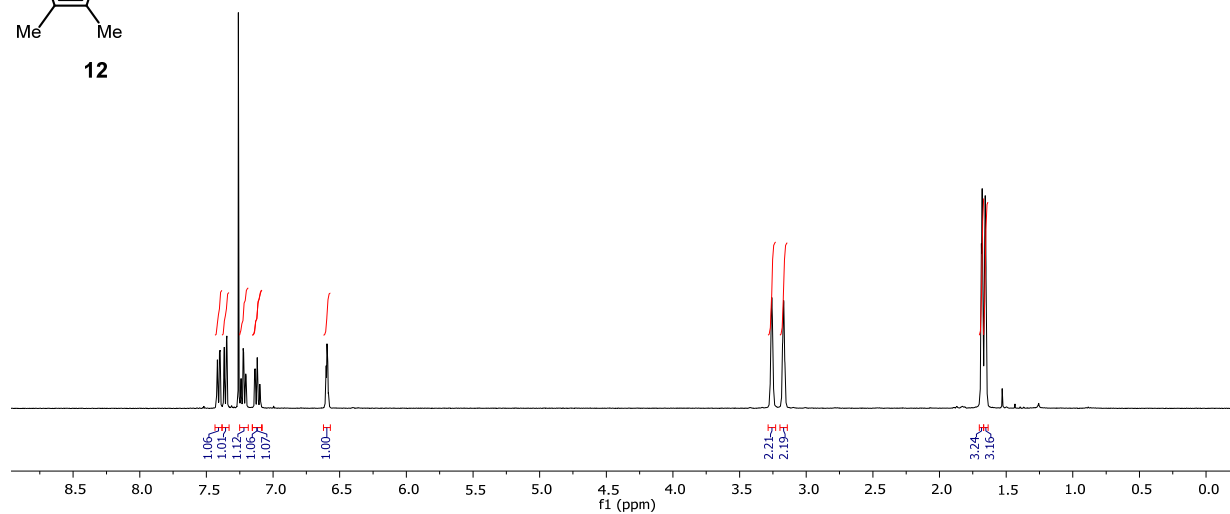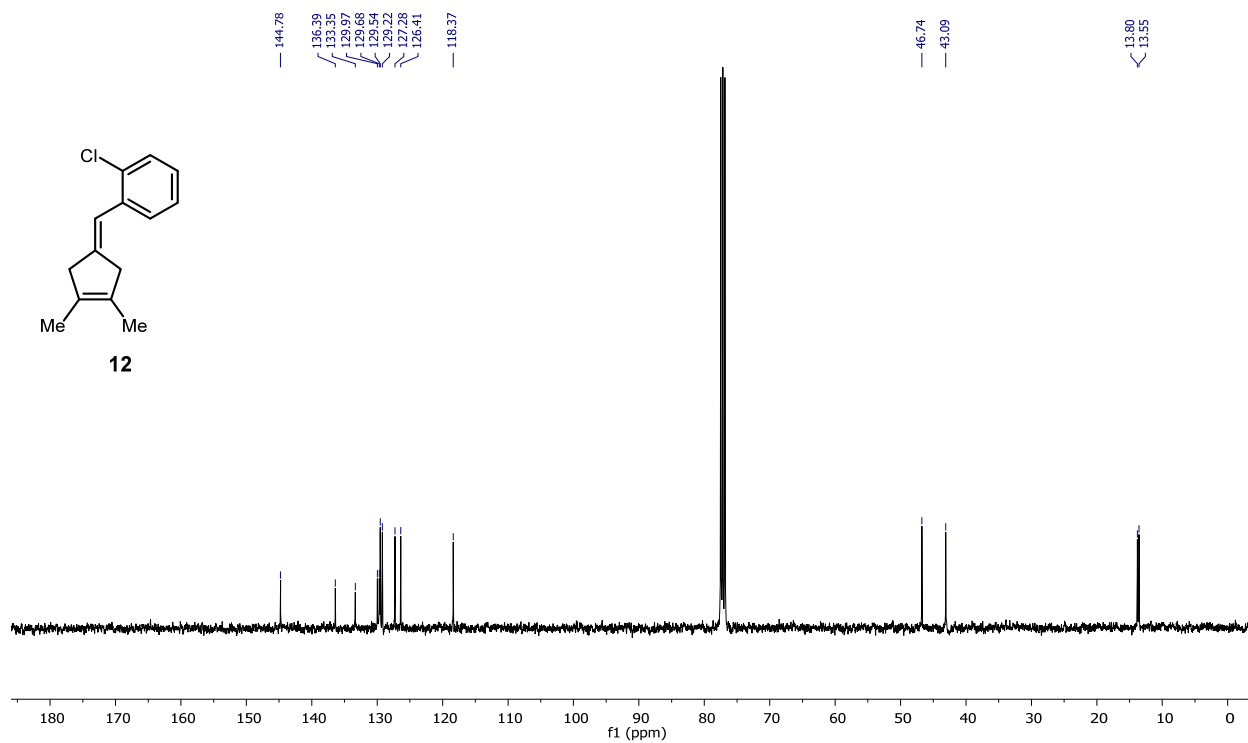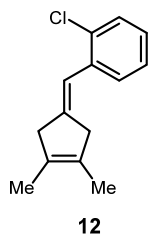

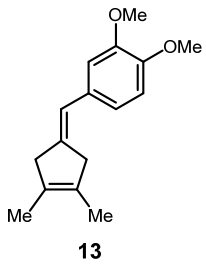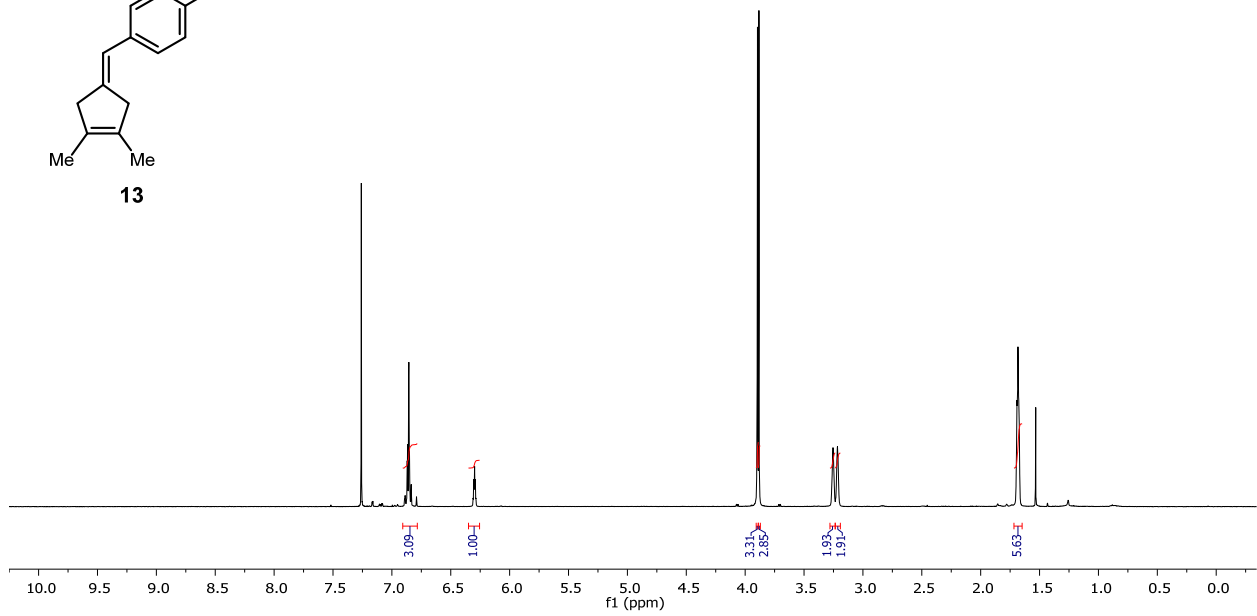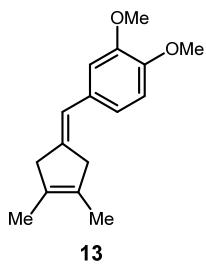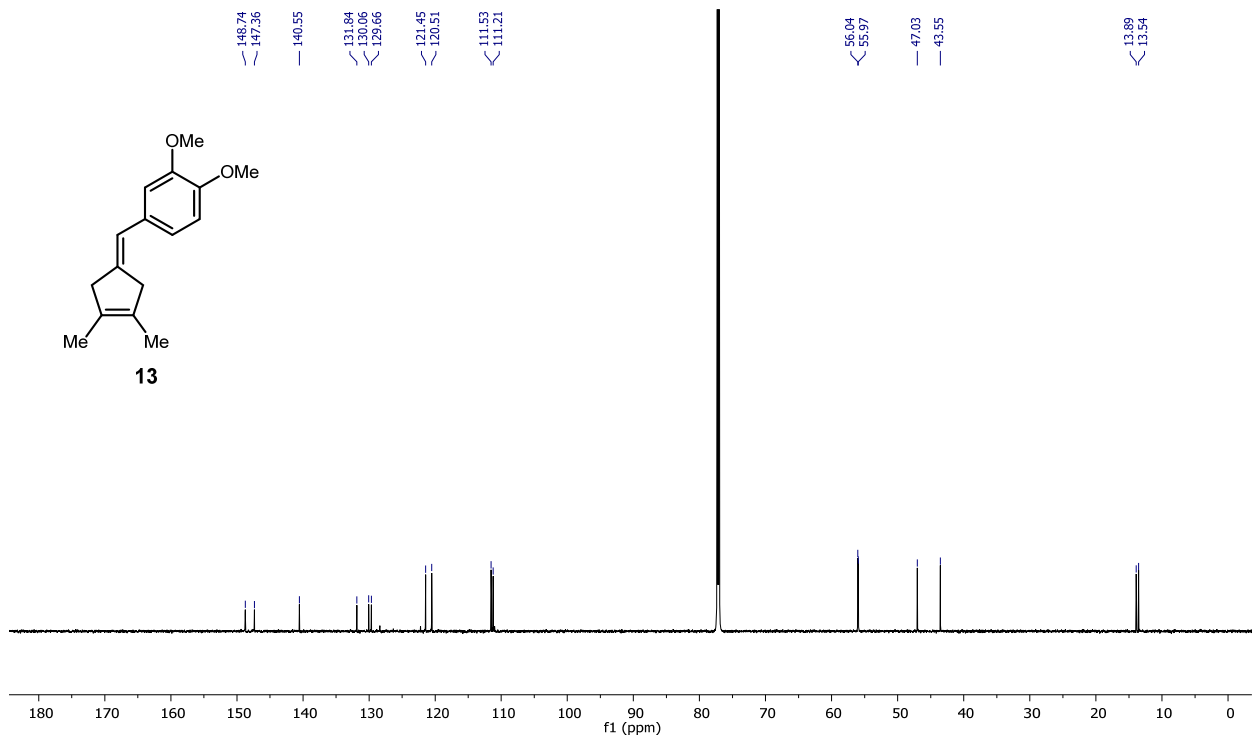

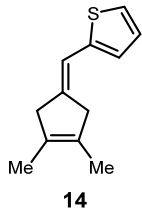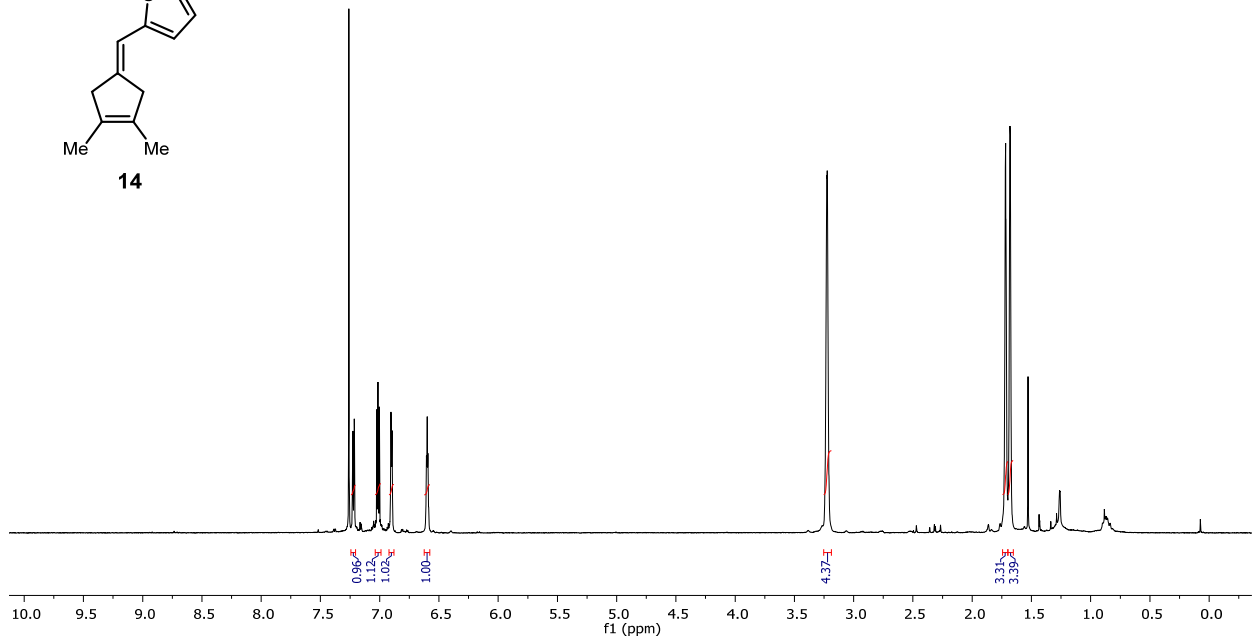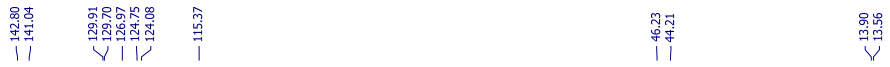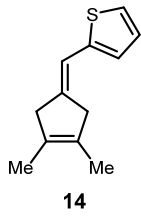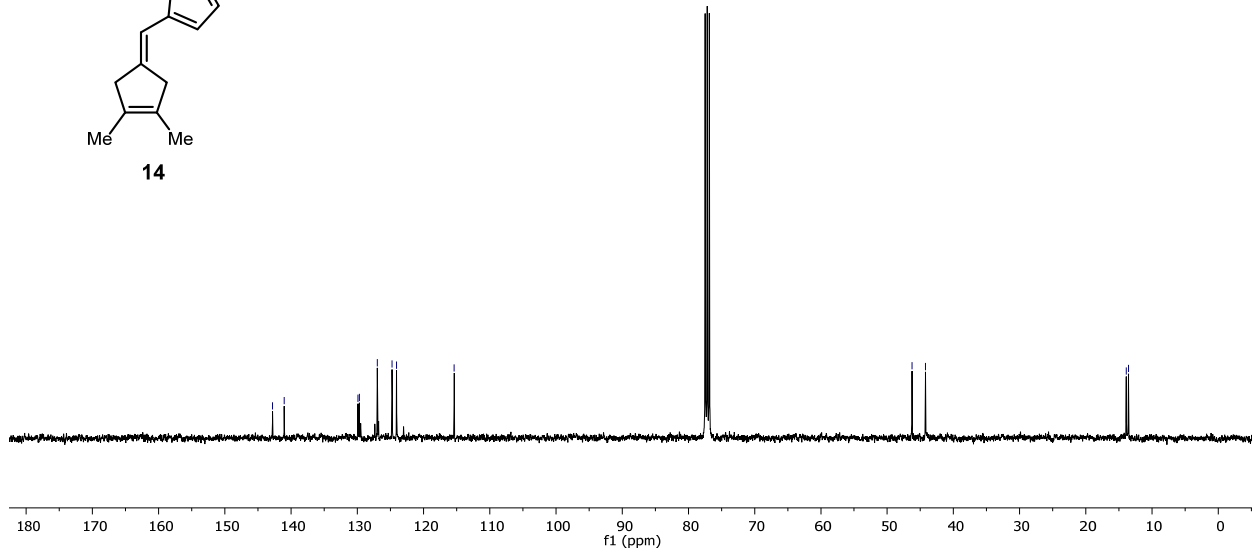

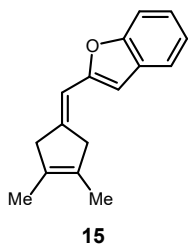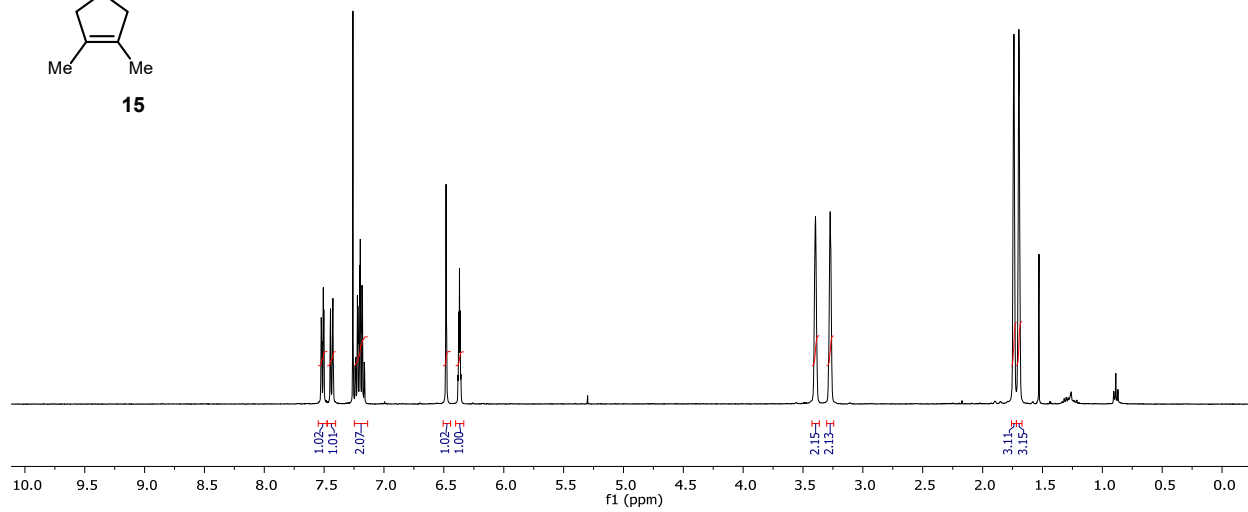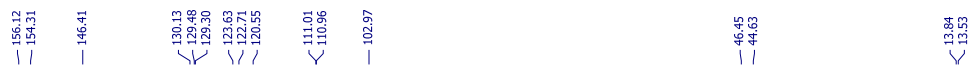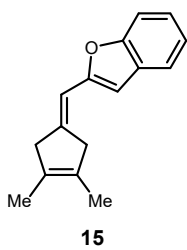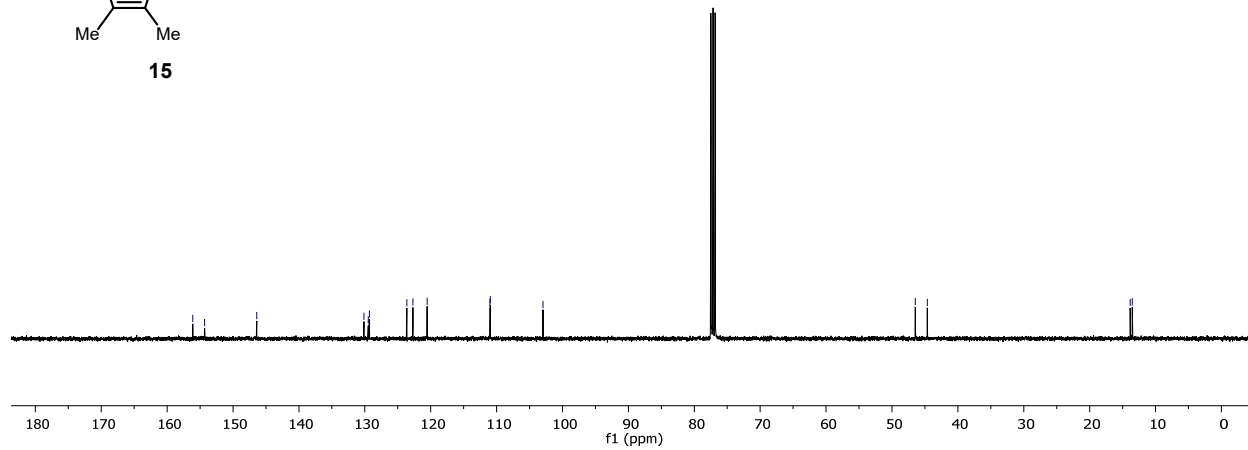

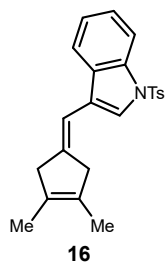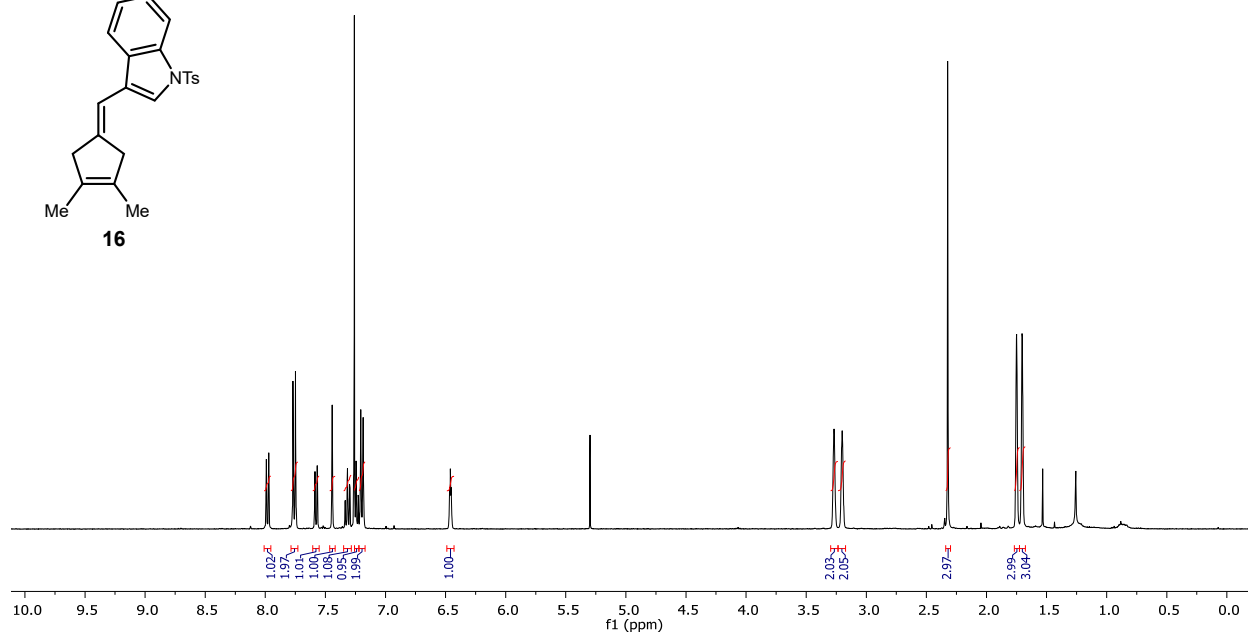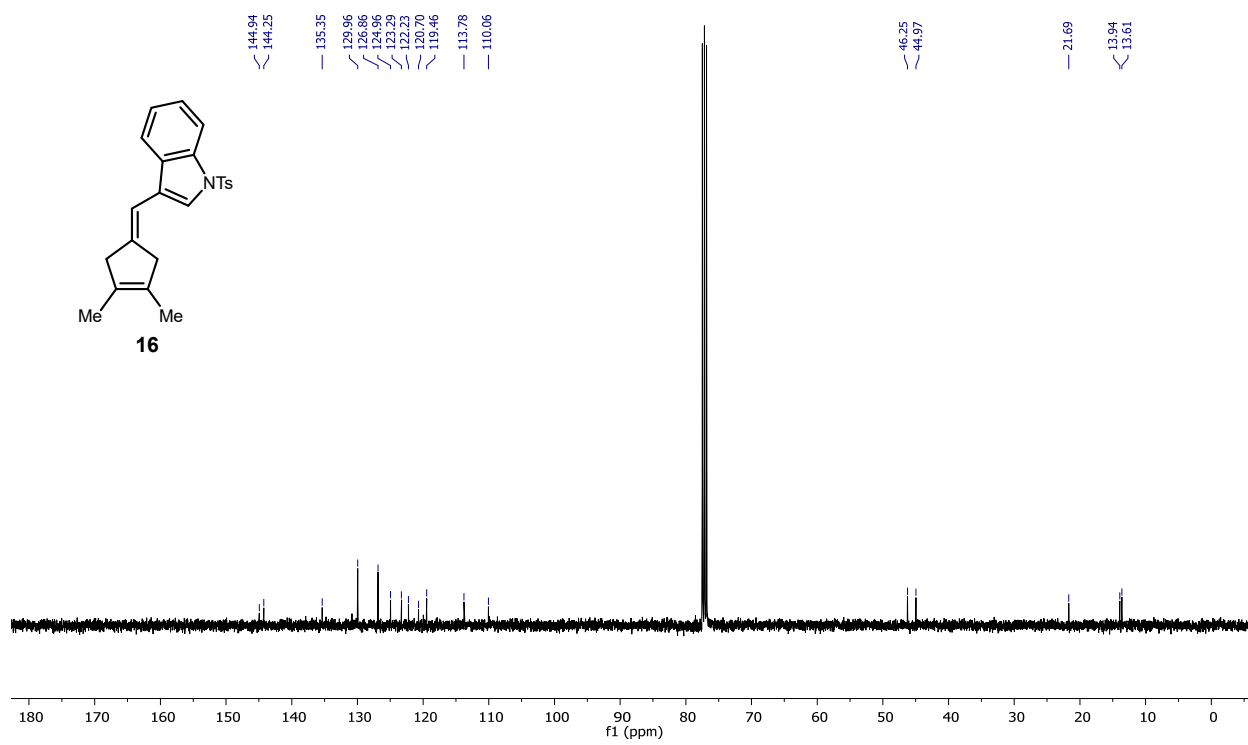

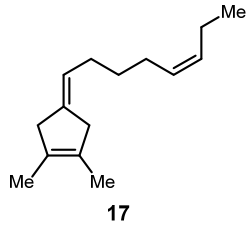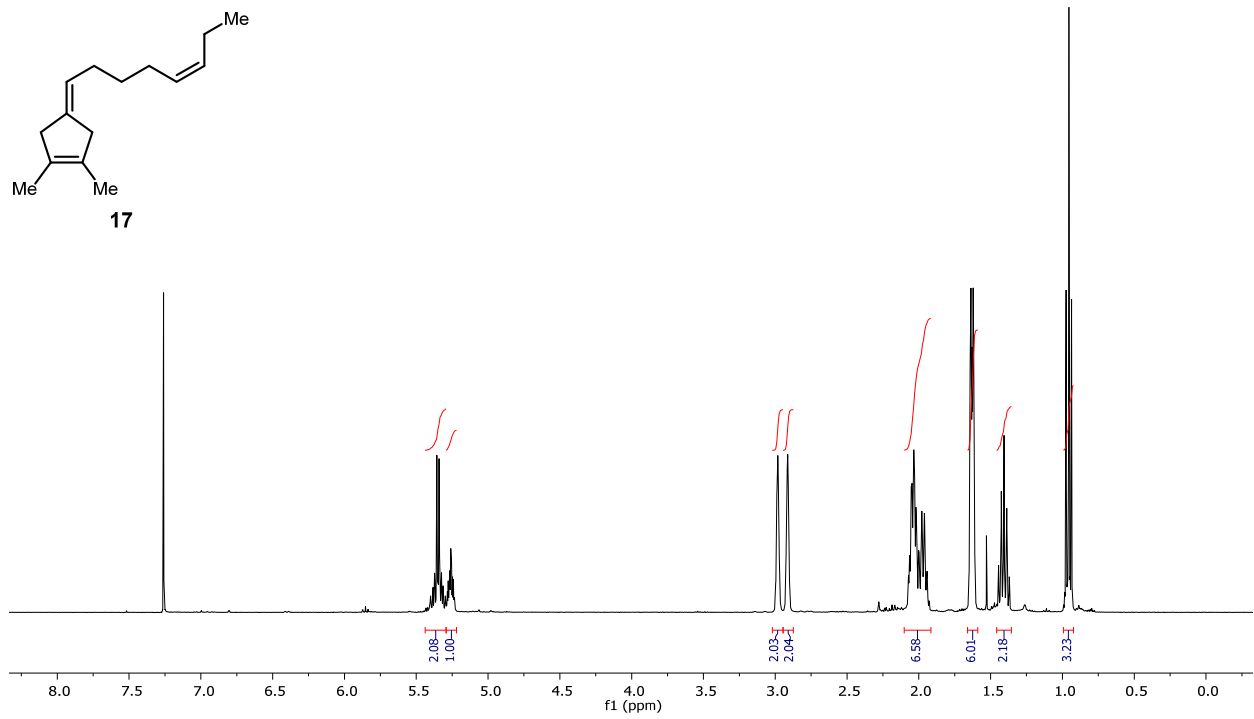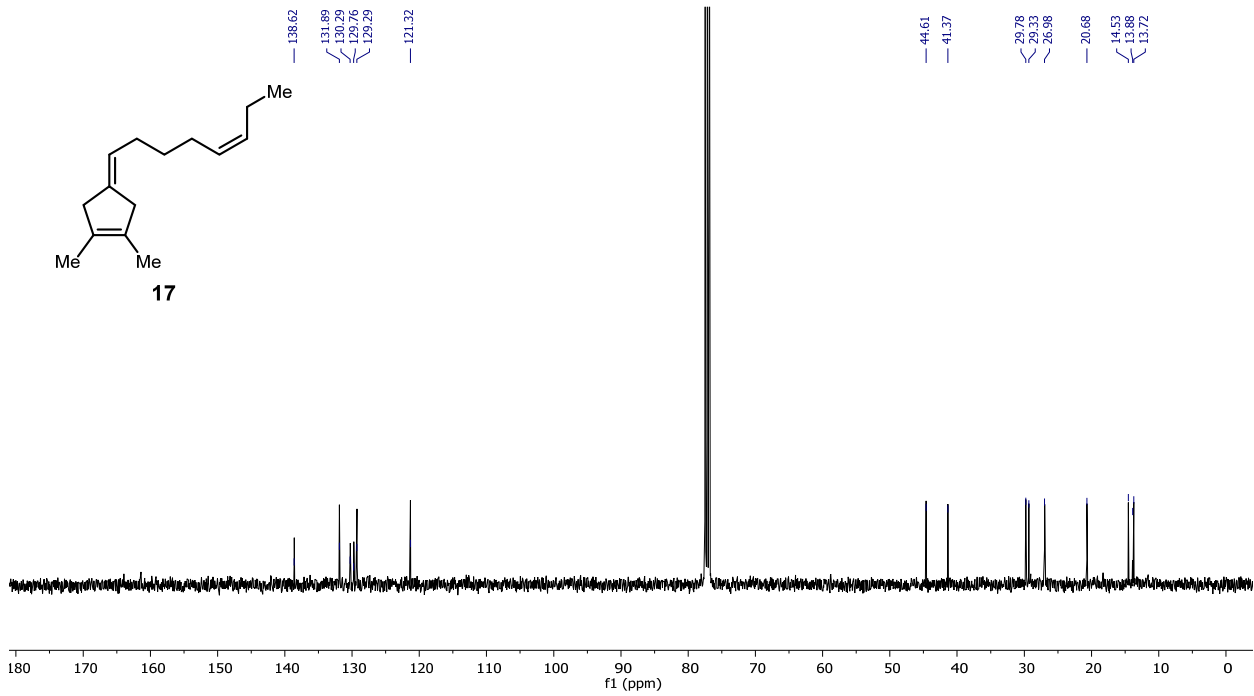

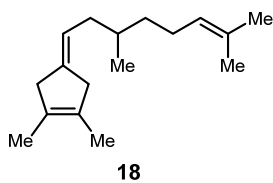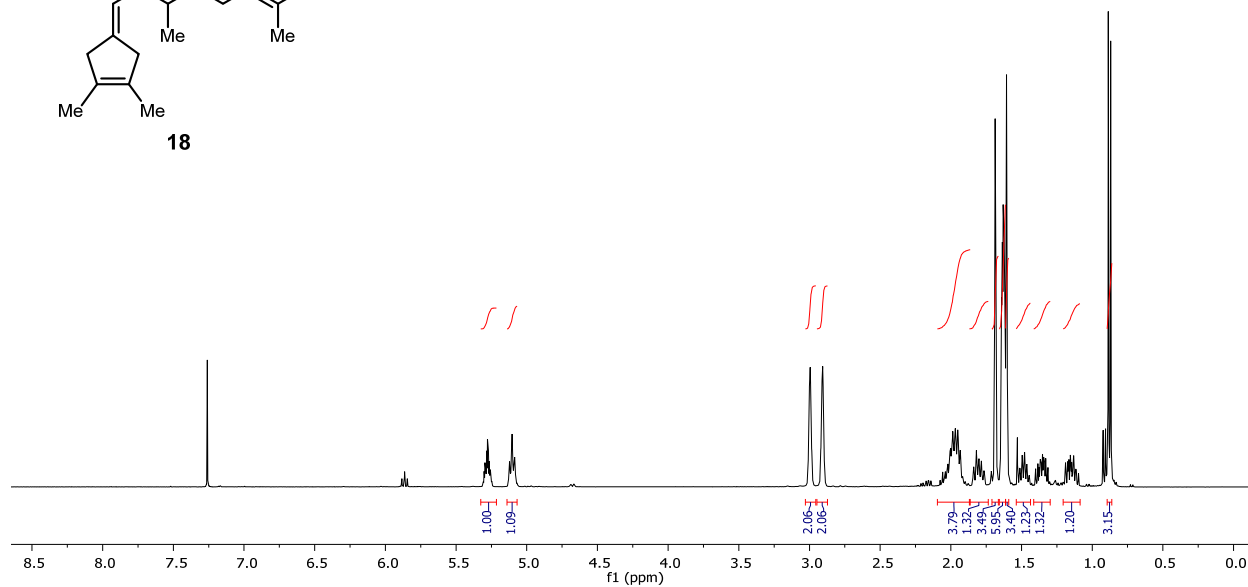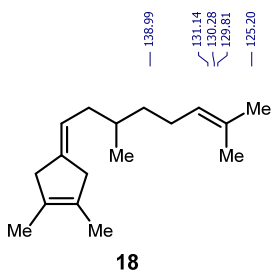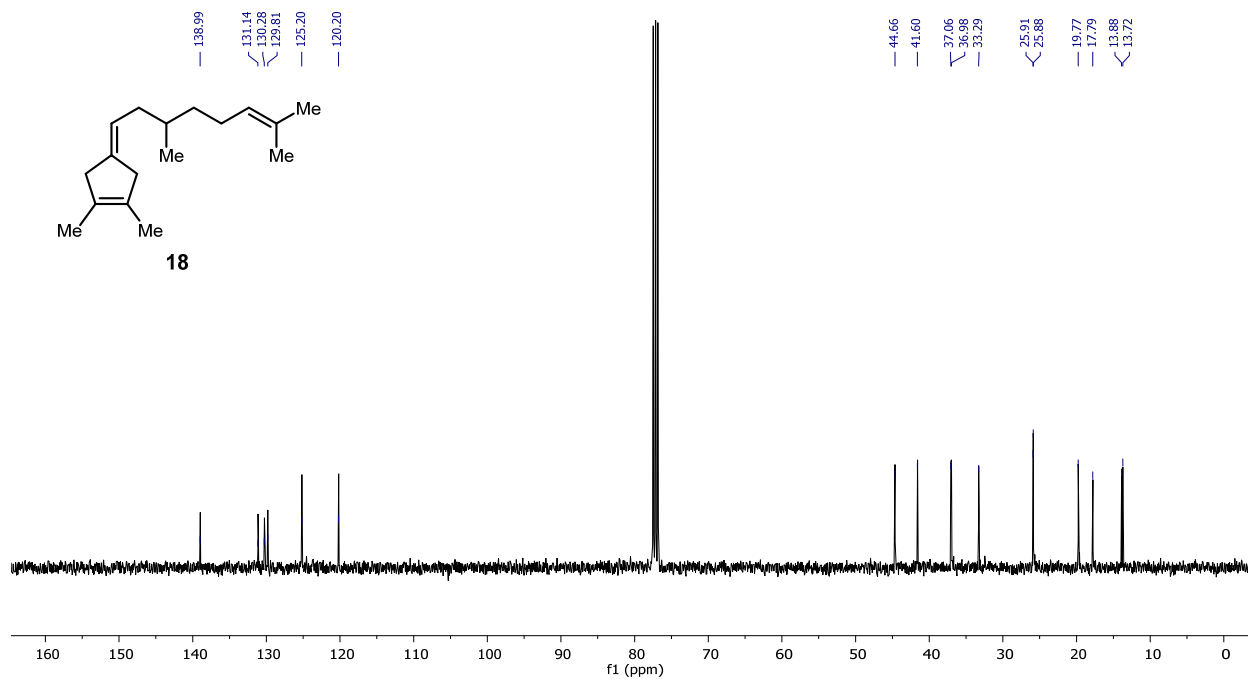

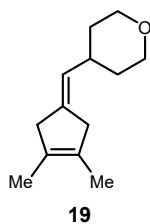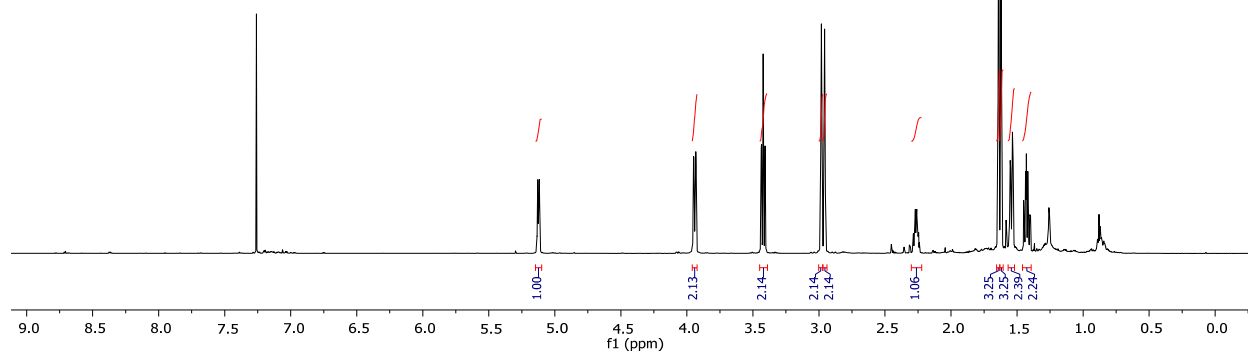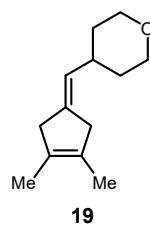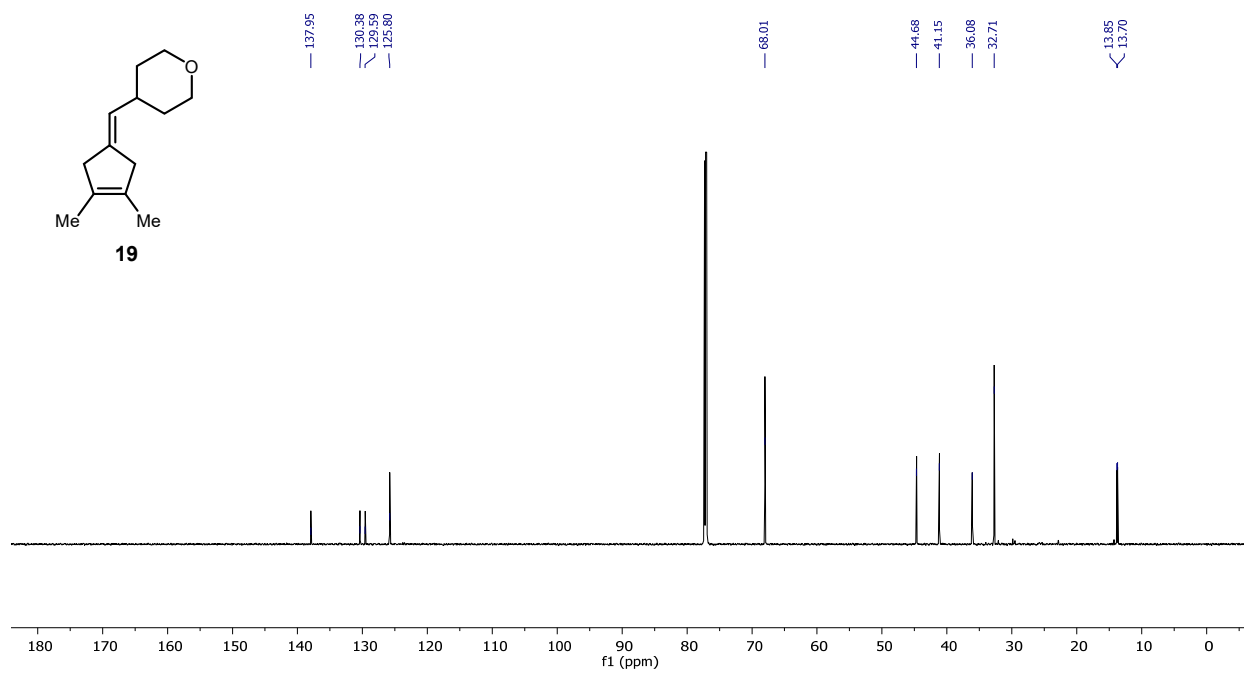



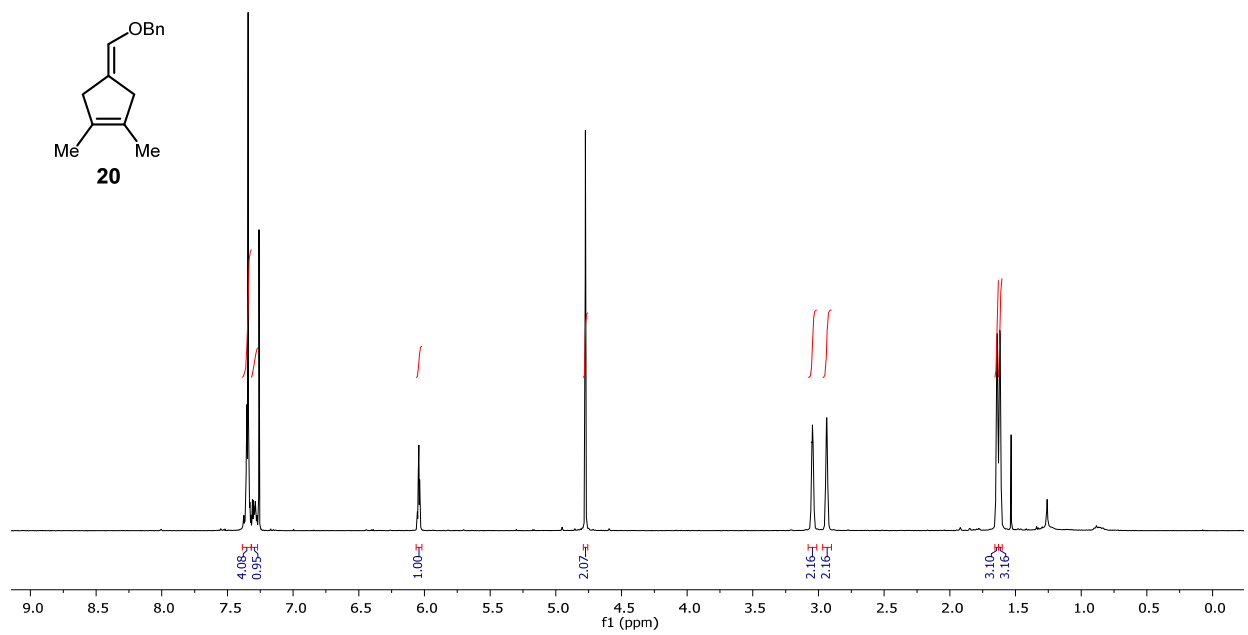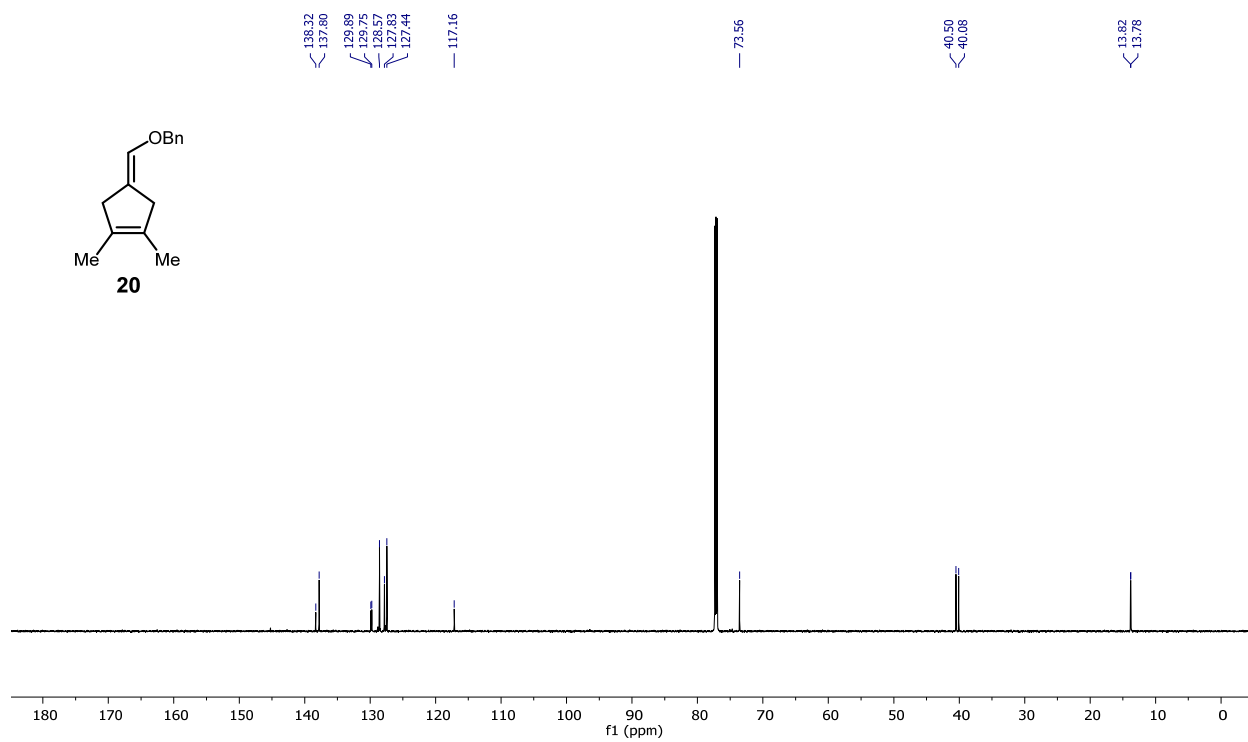

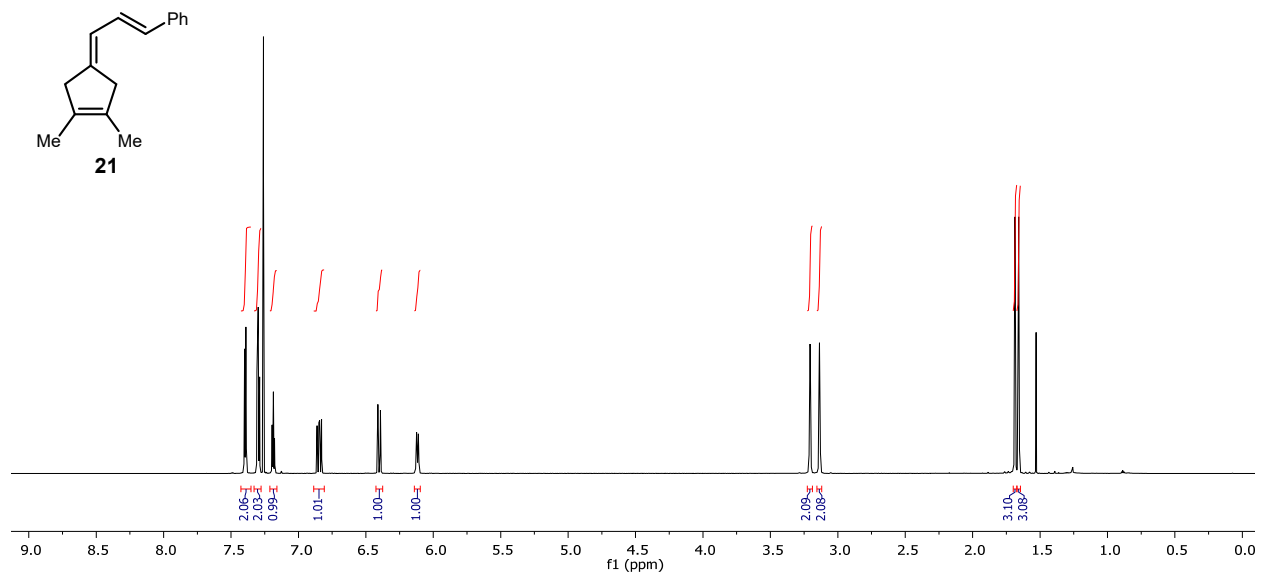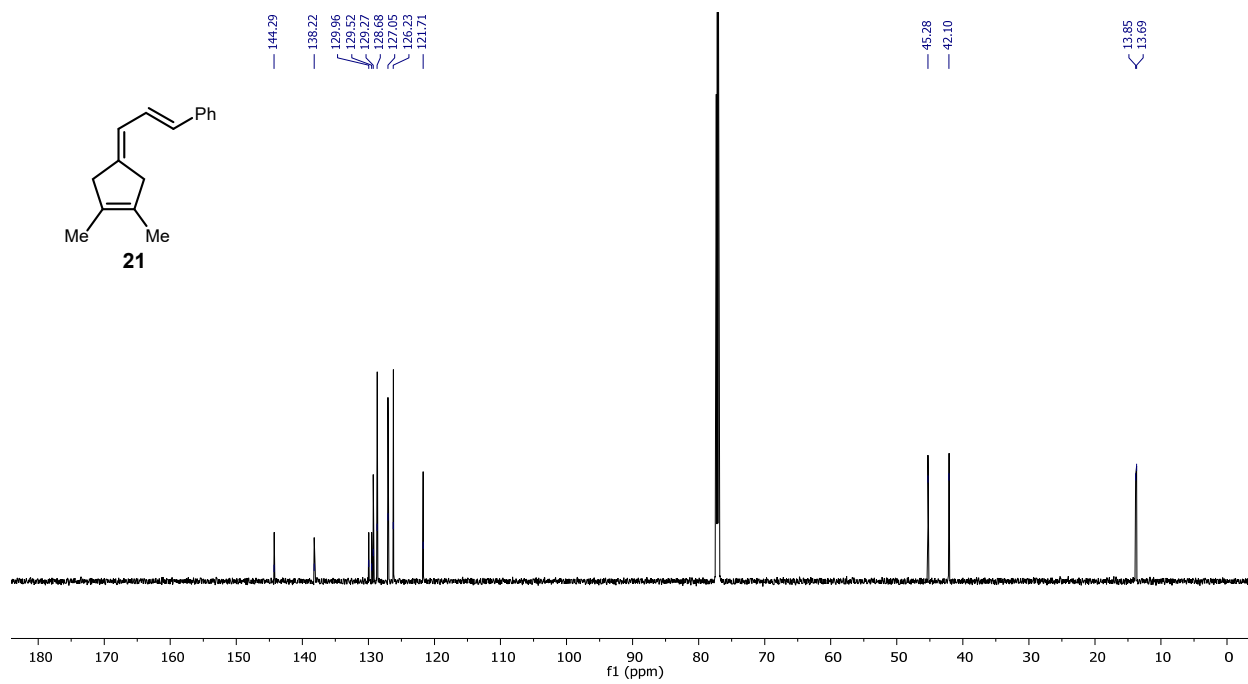

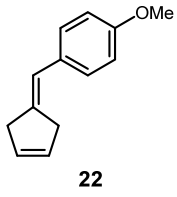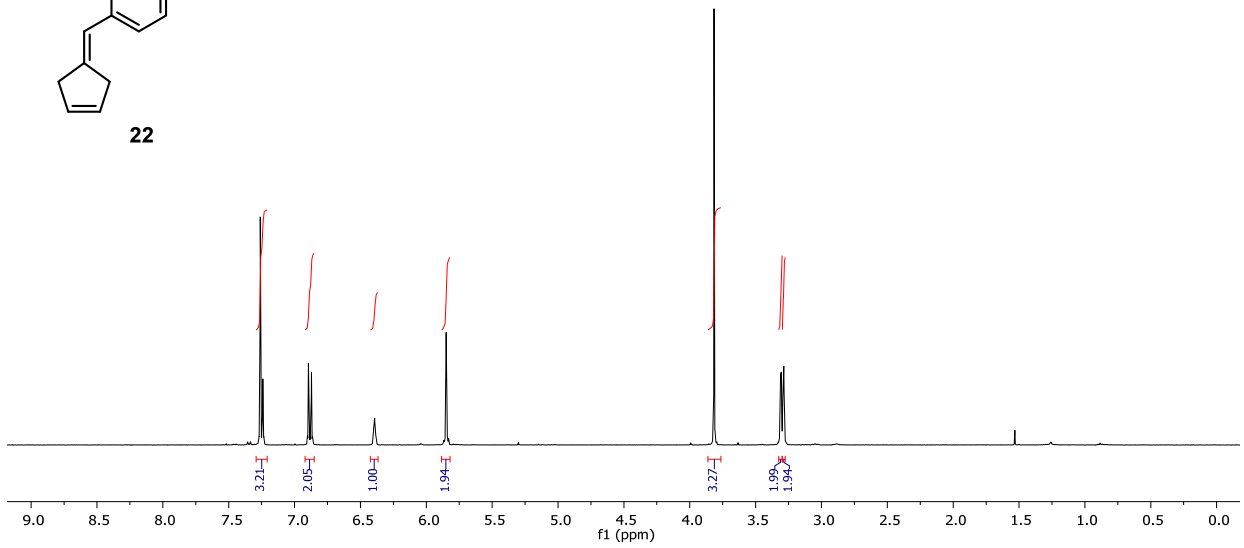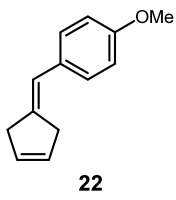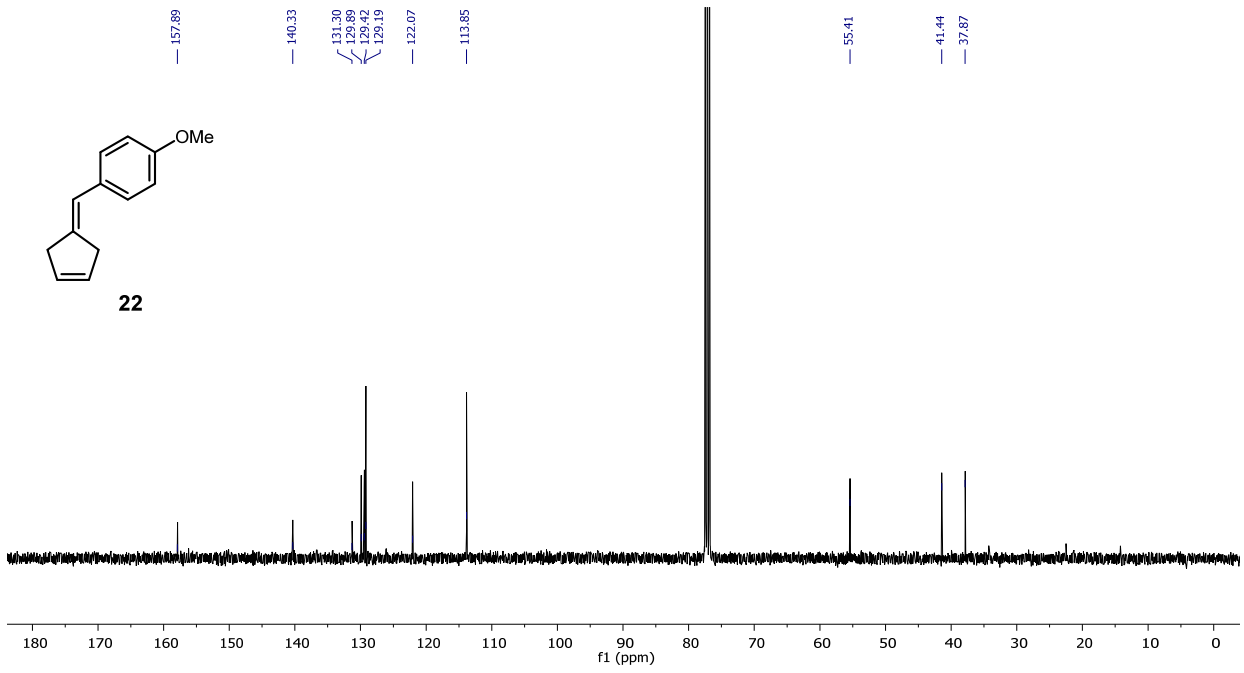

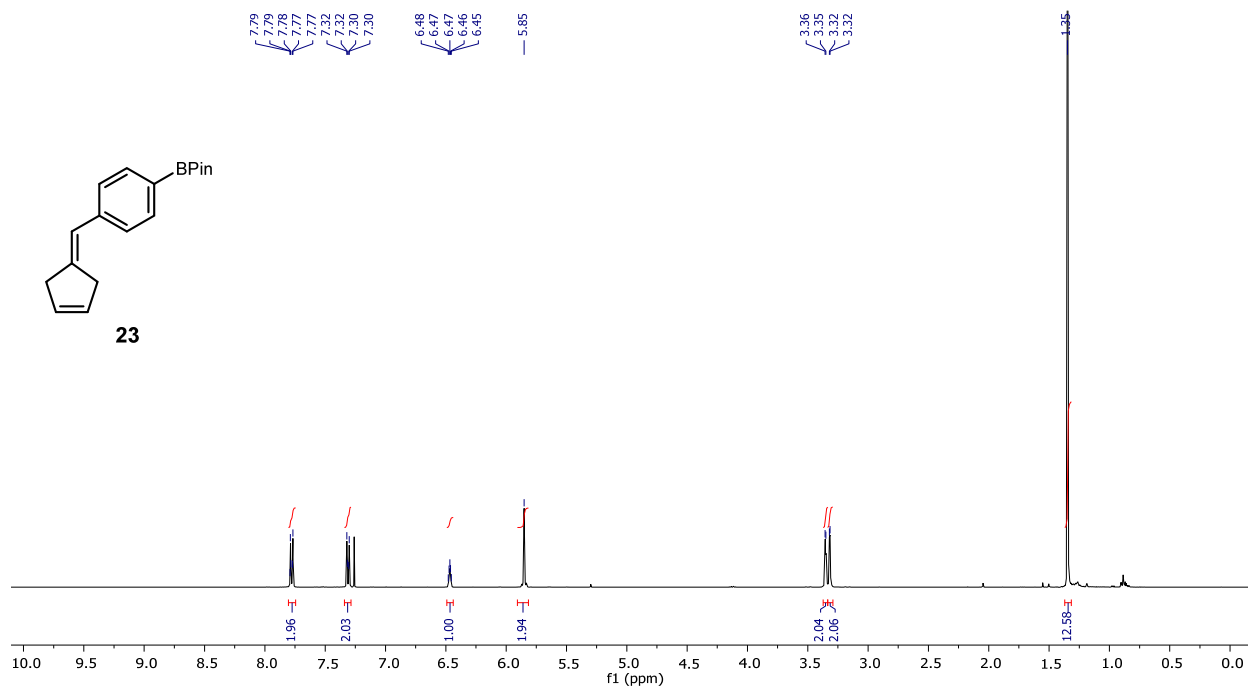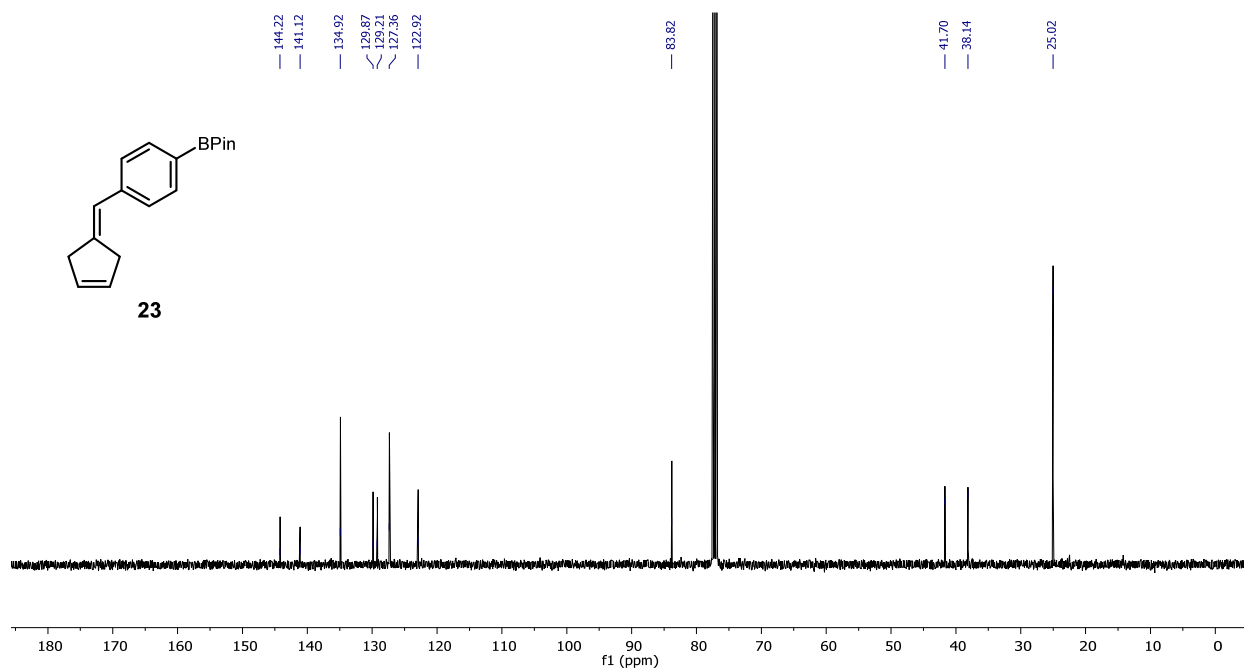

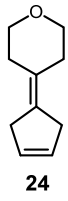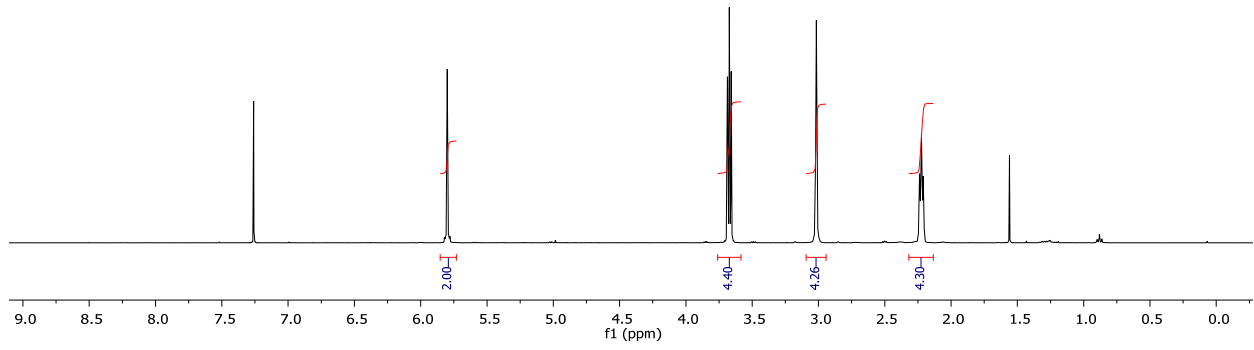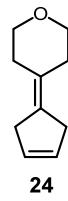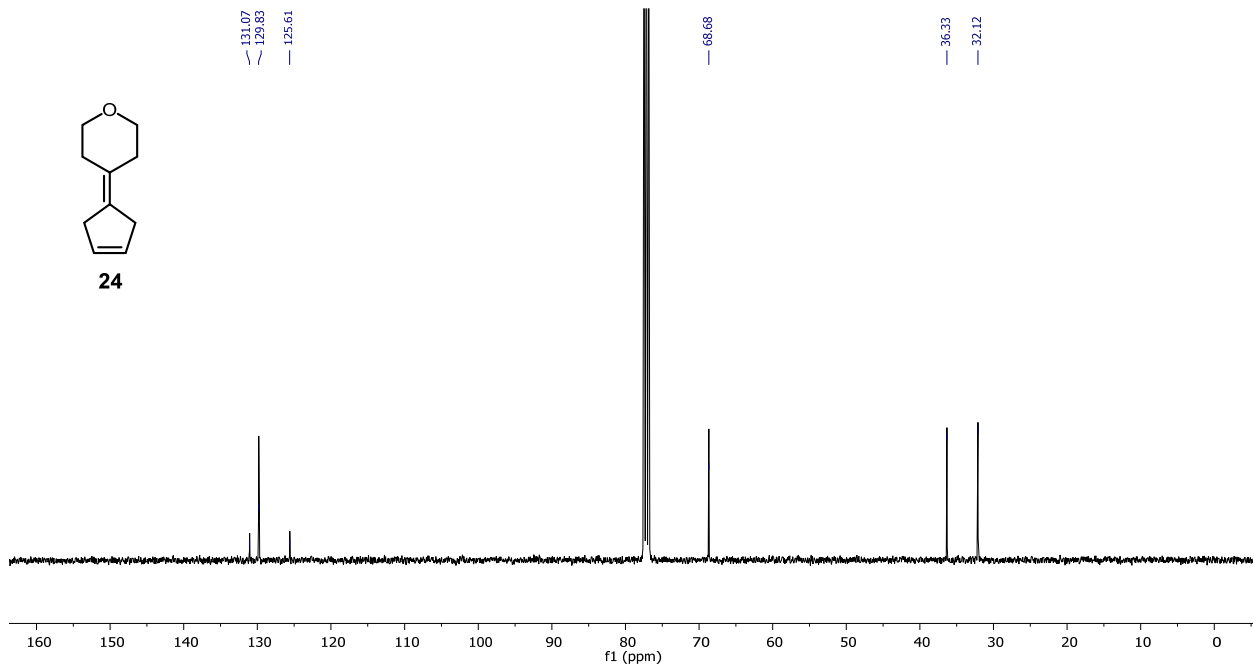

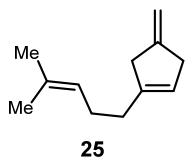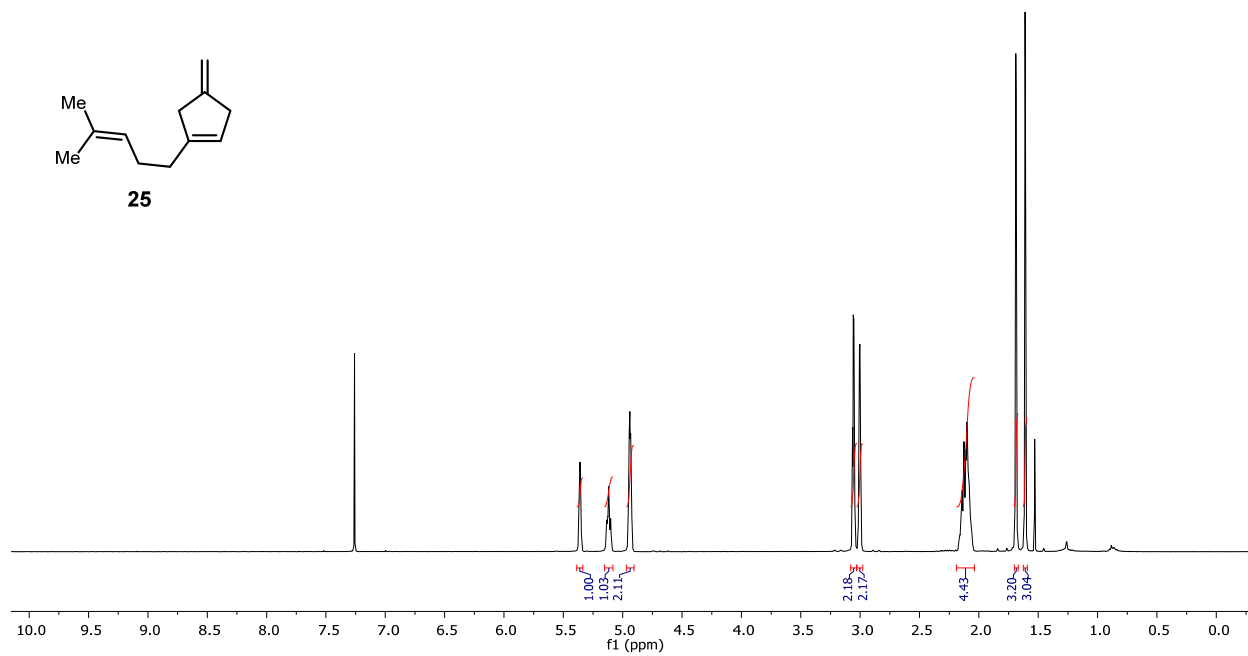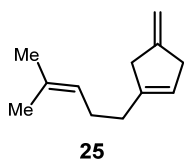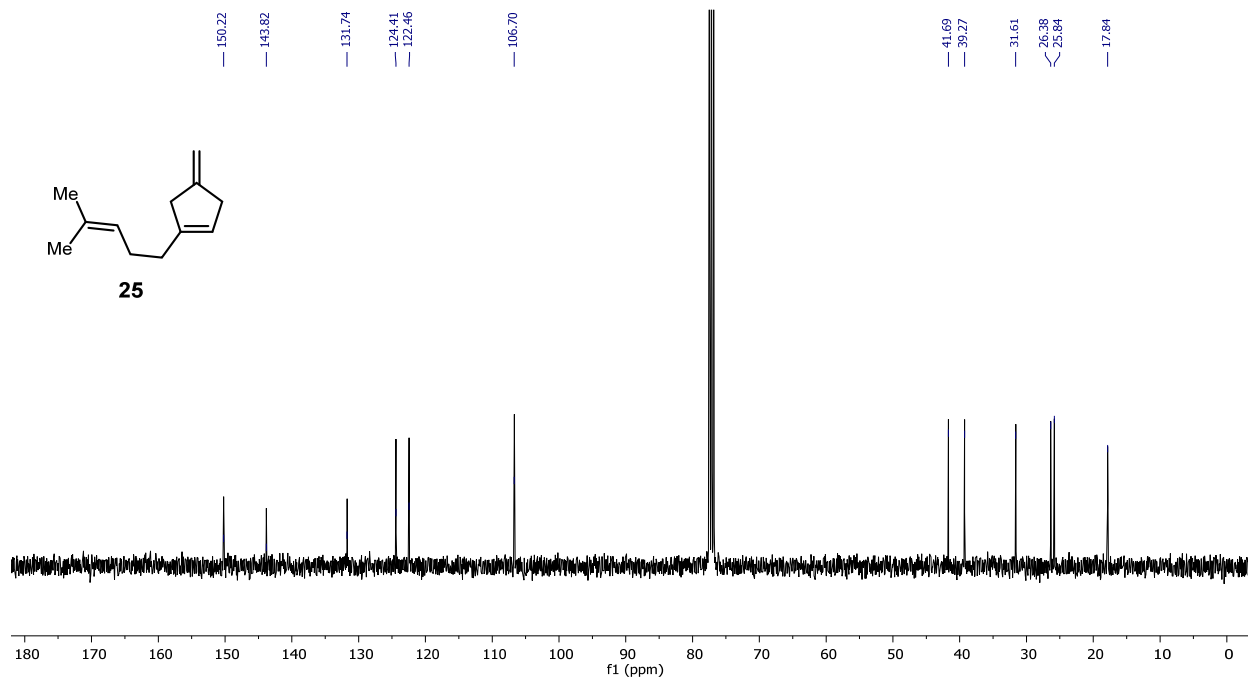

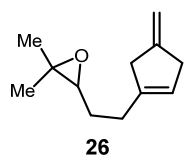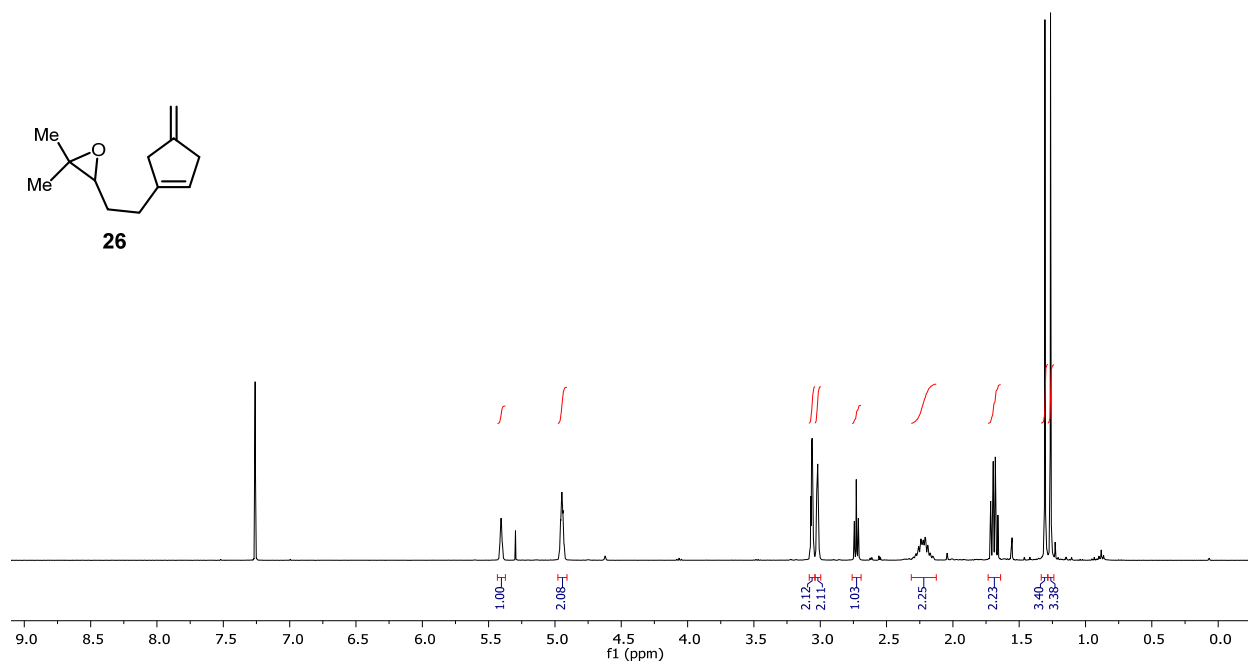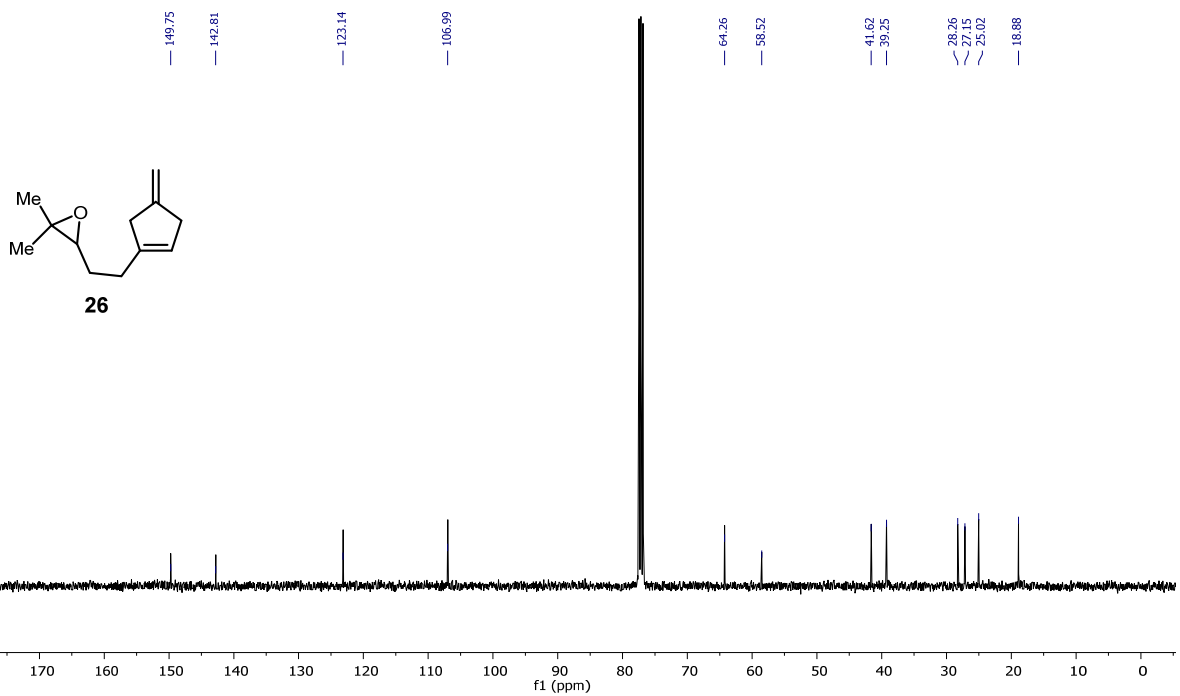

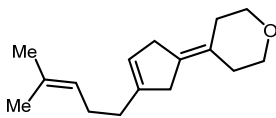

27

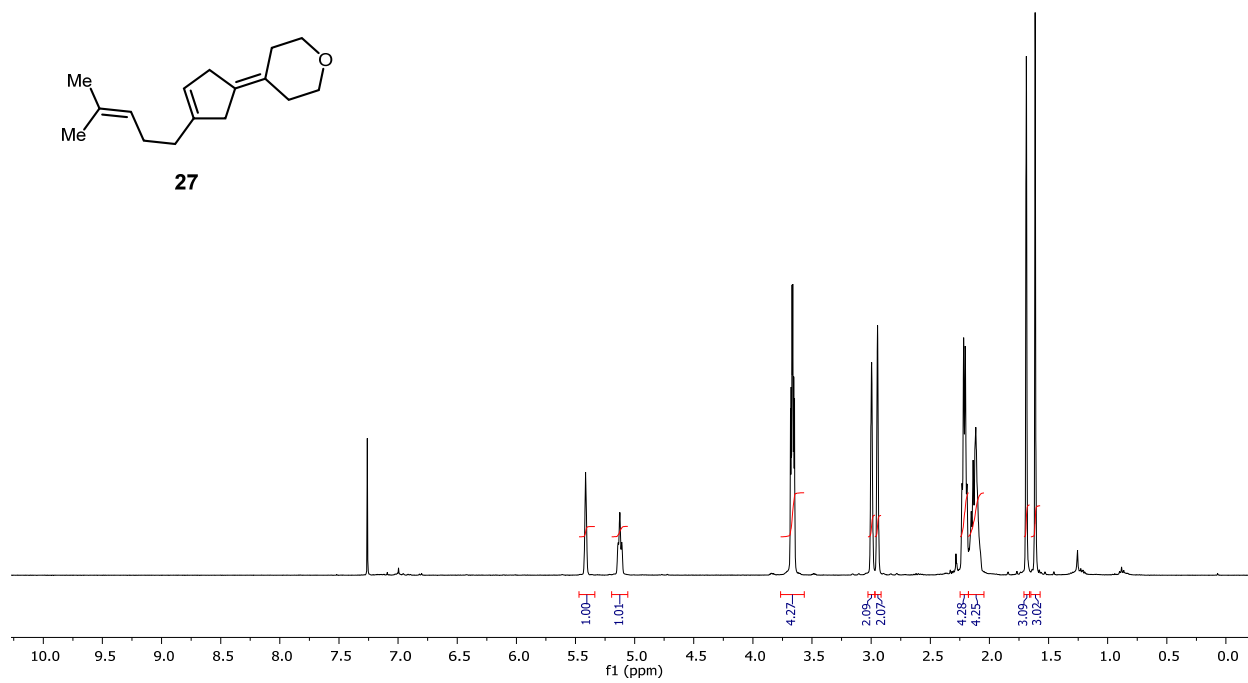

143.54  
131.74  
125.34  
124.42  
122.36  
68.70  
38.97  
36.46  
32.06  
31.79  
31.70  
26.42  
25.84  
17.85

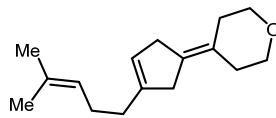

27

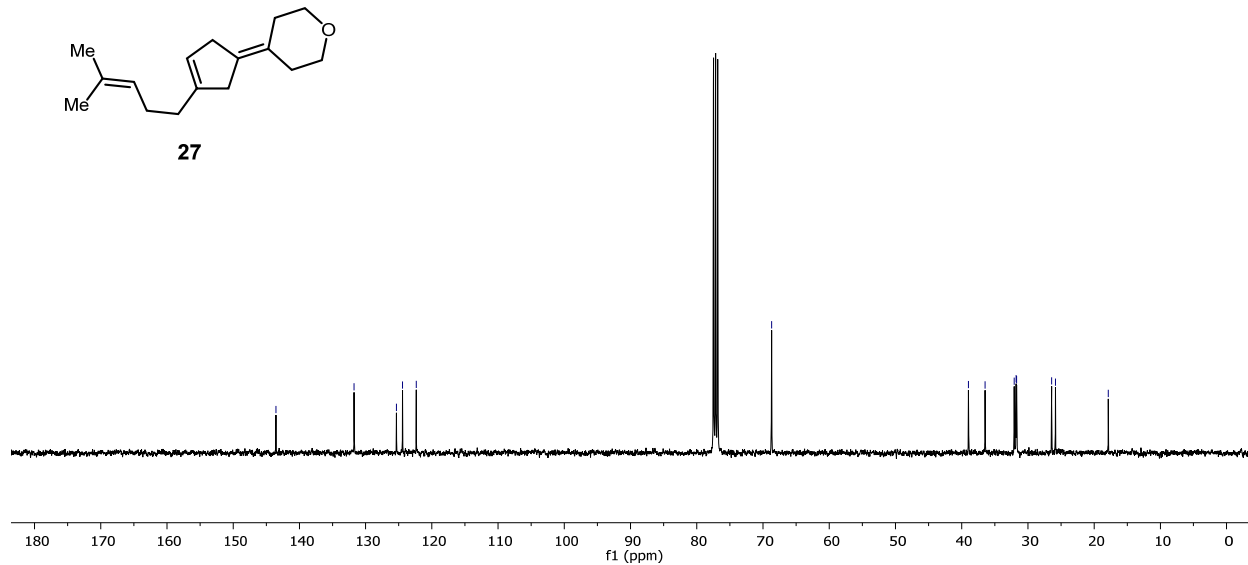



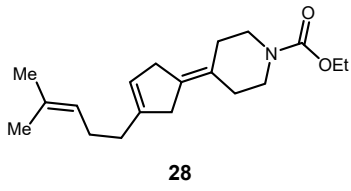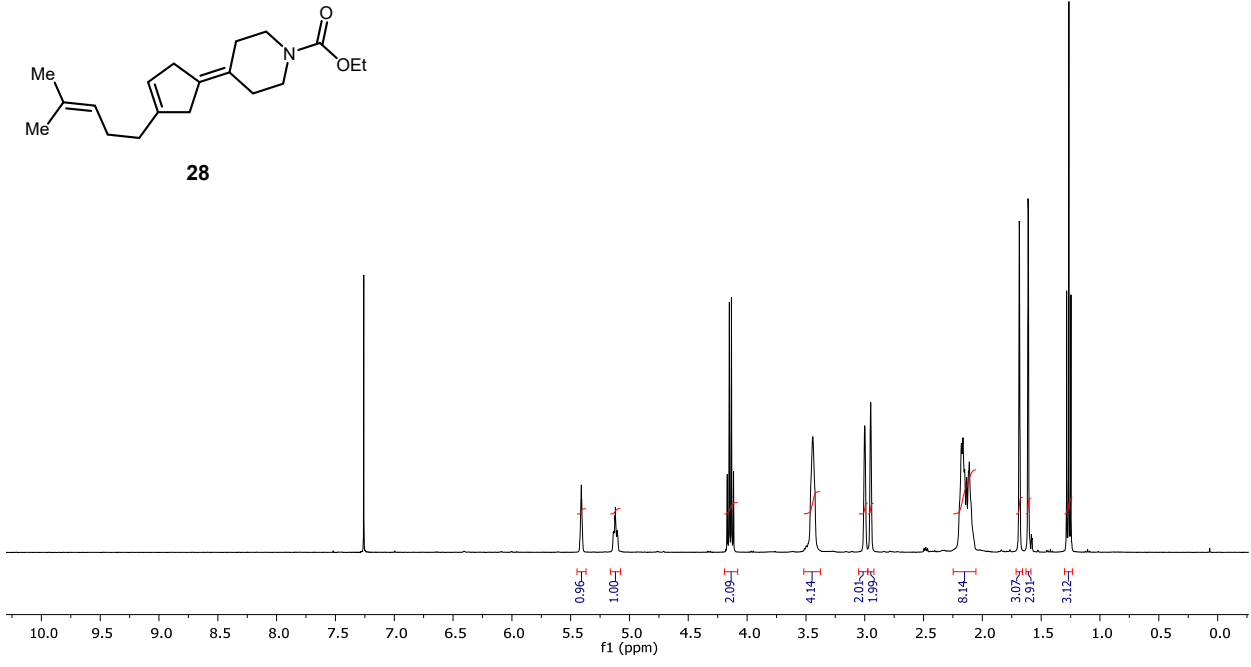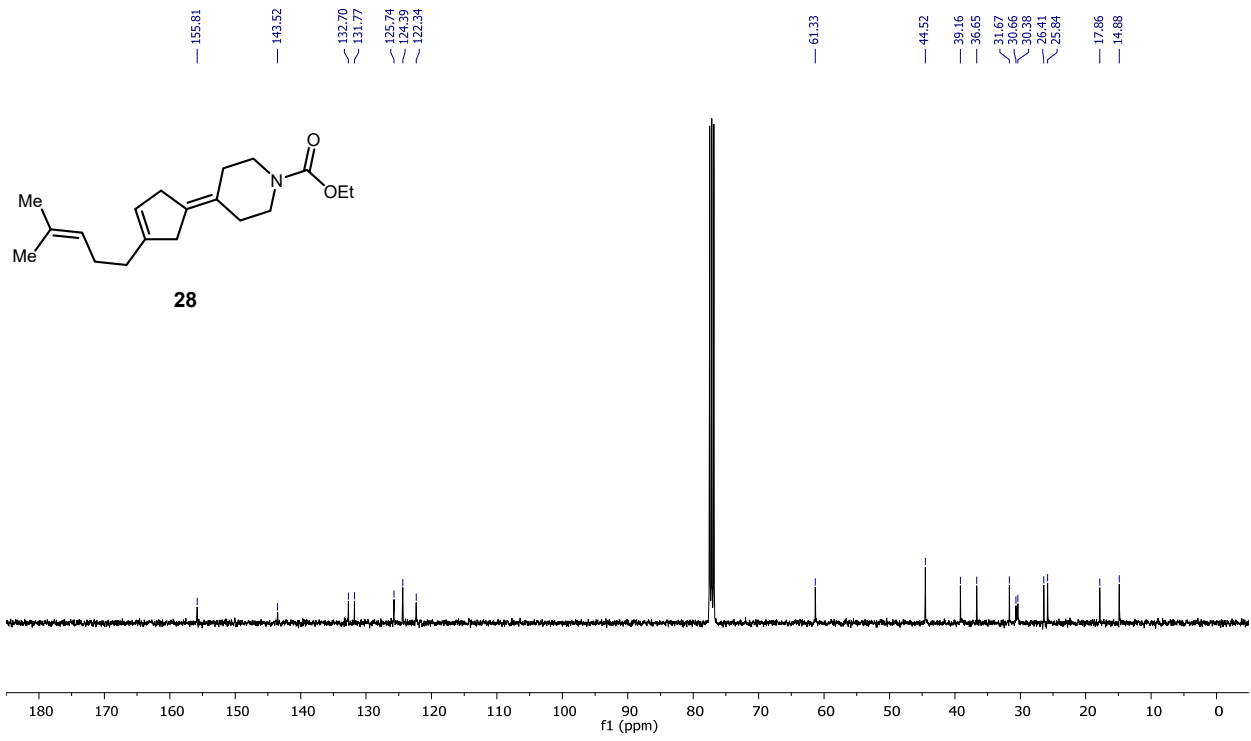

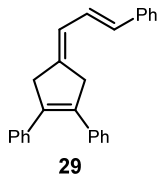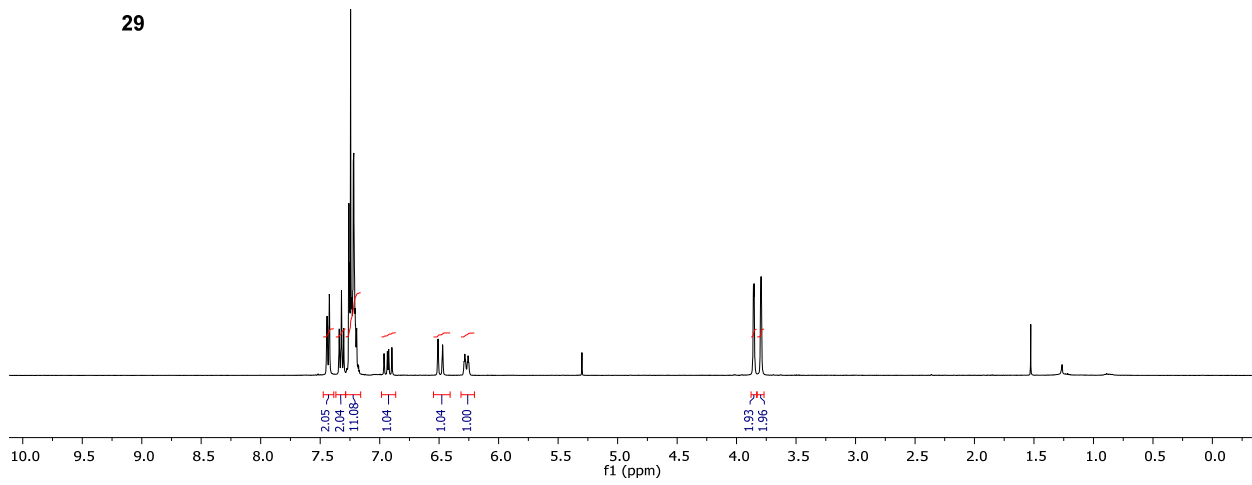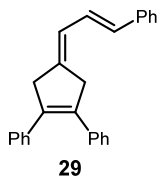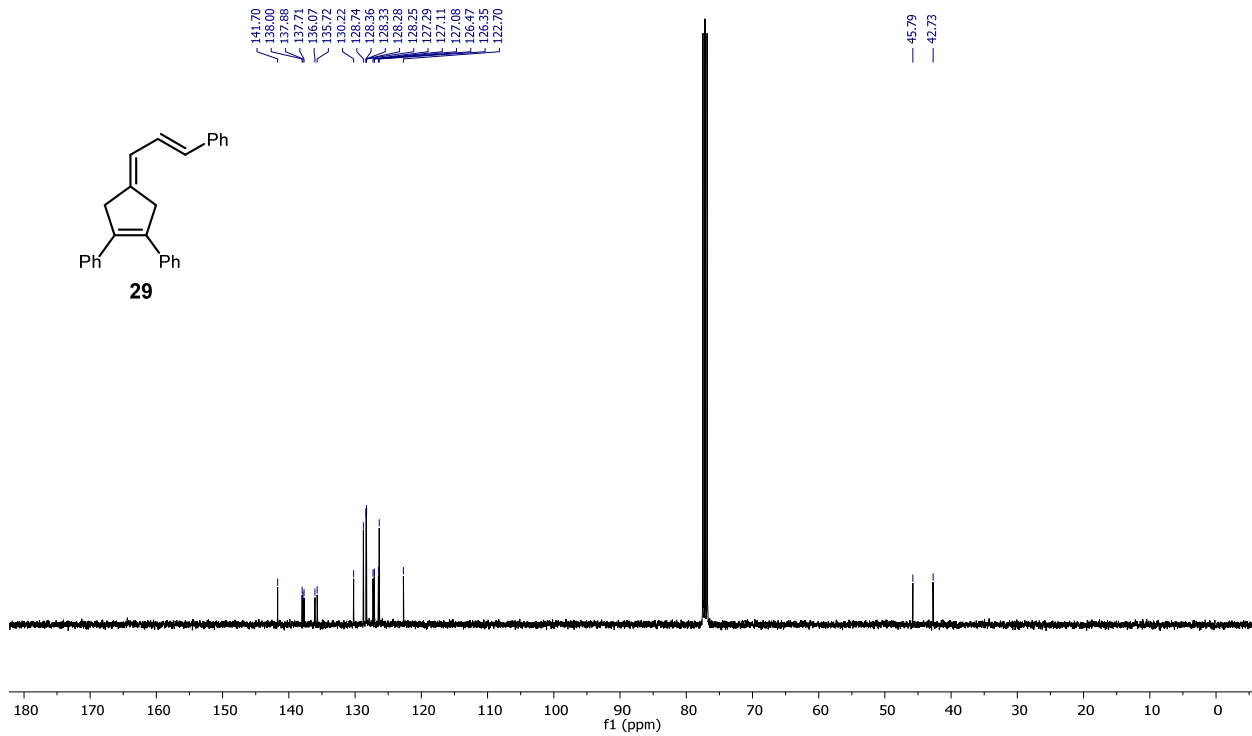

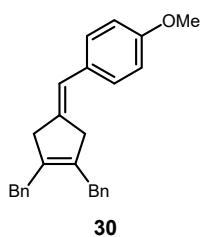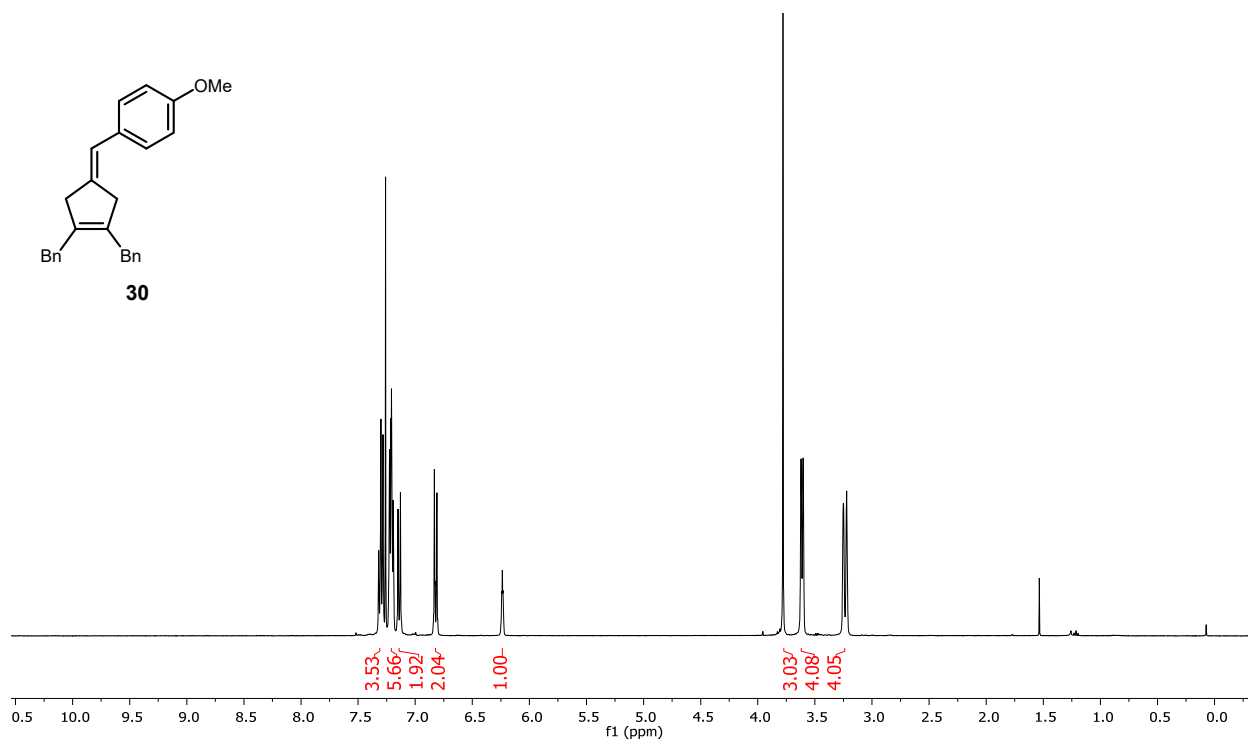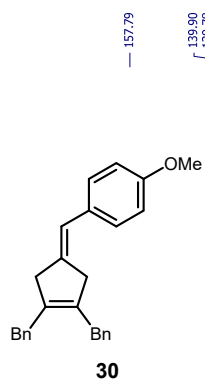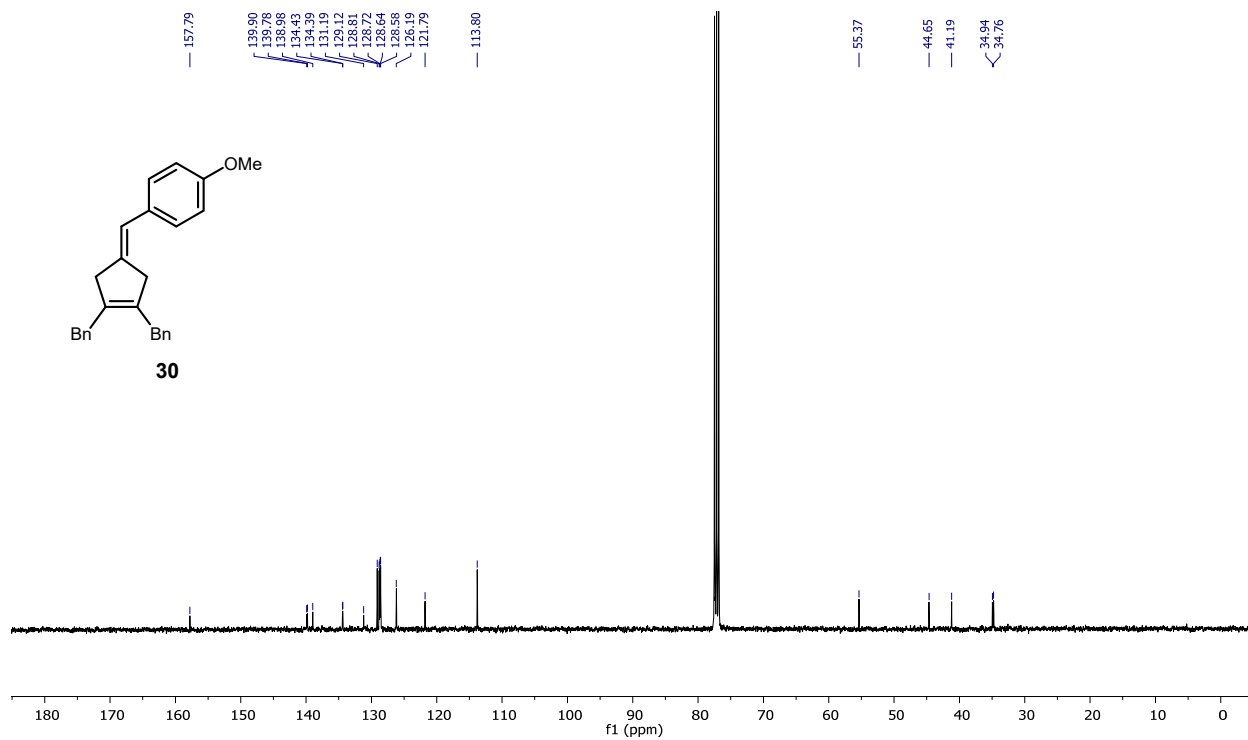

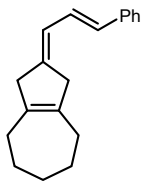

31

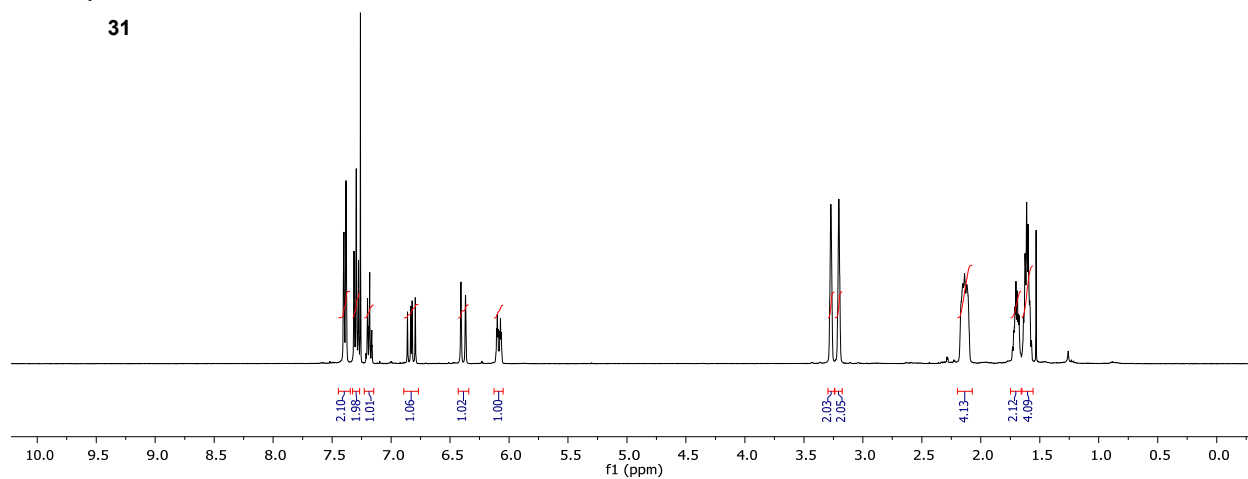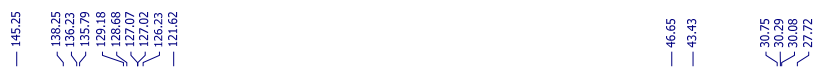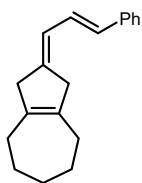

31

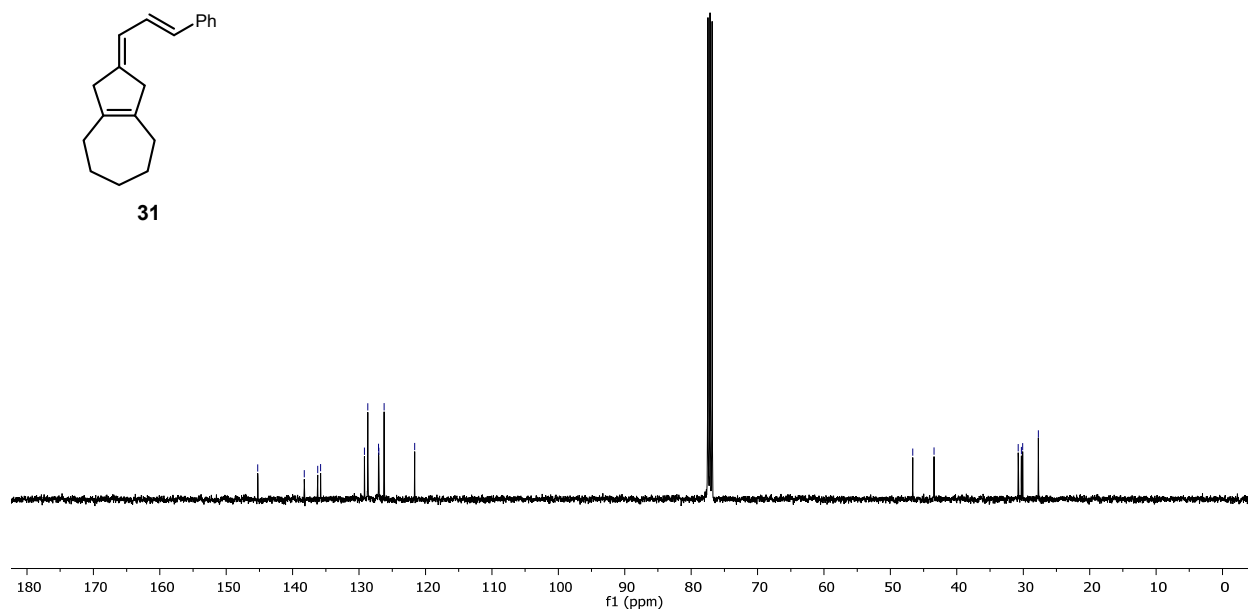

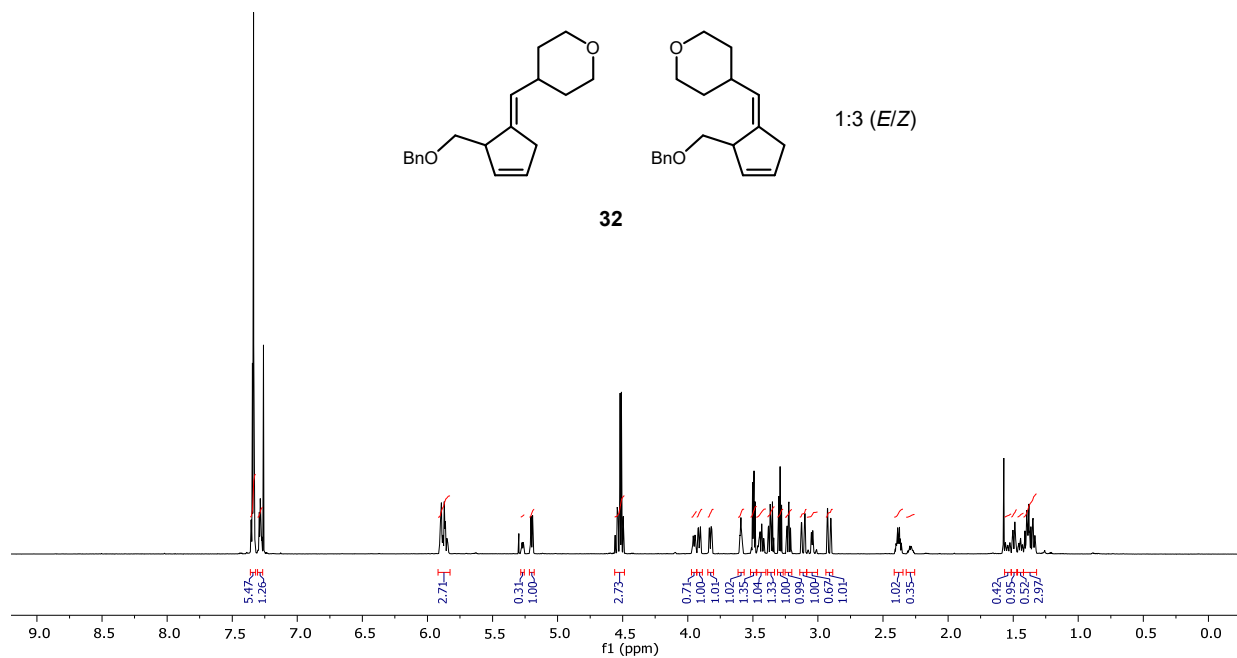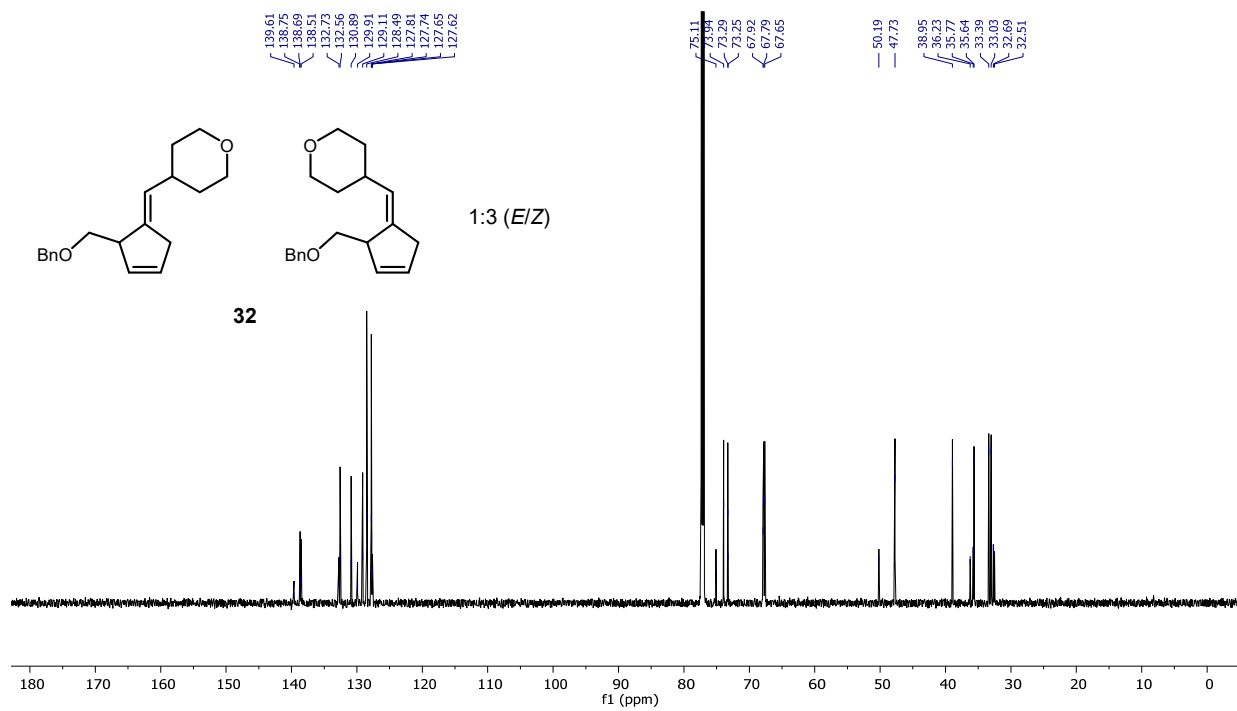

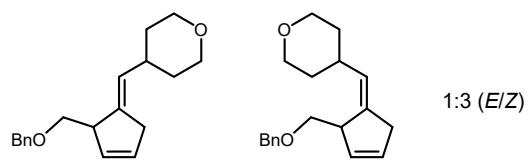

32

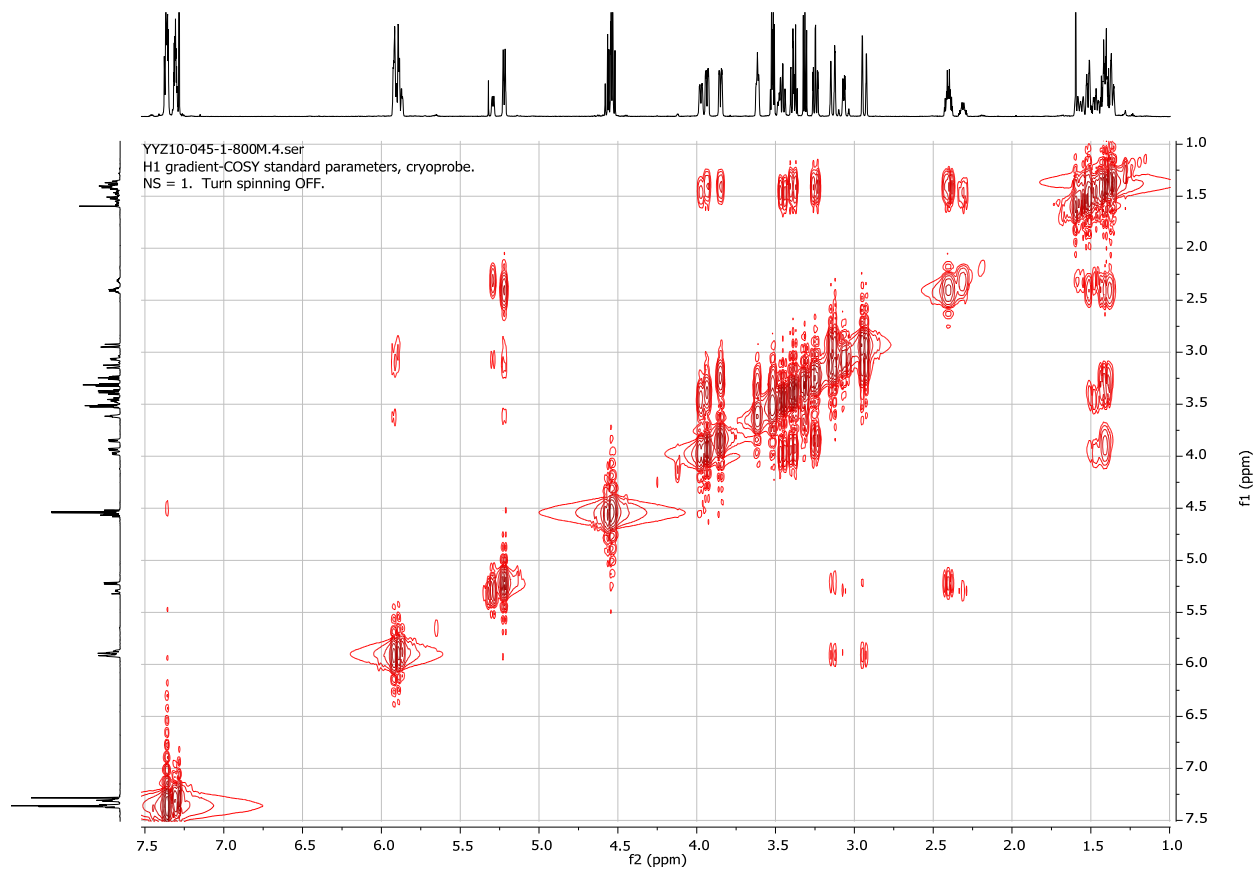

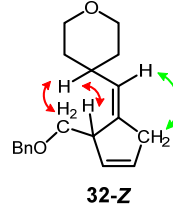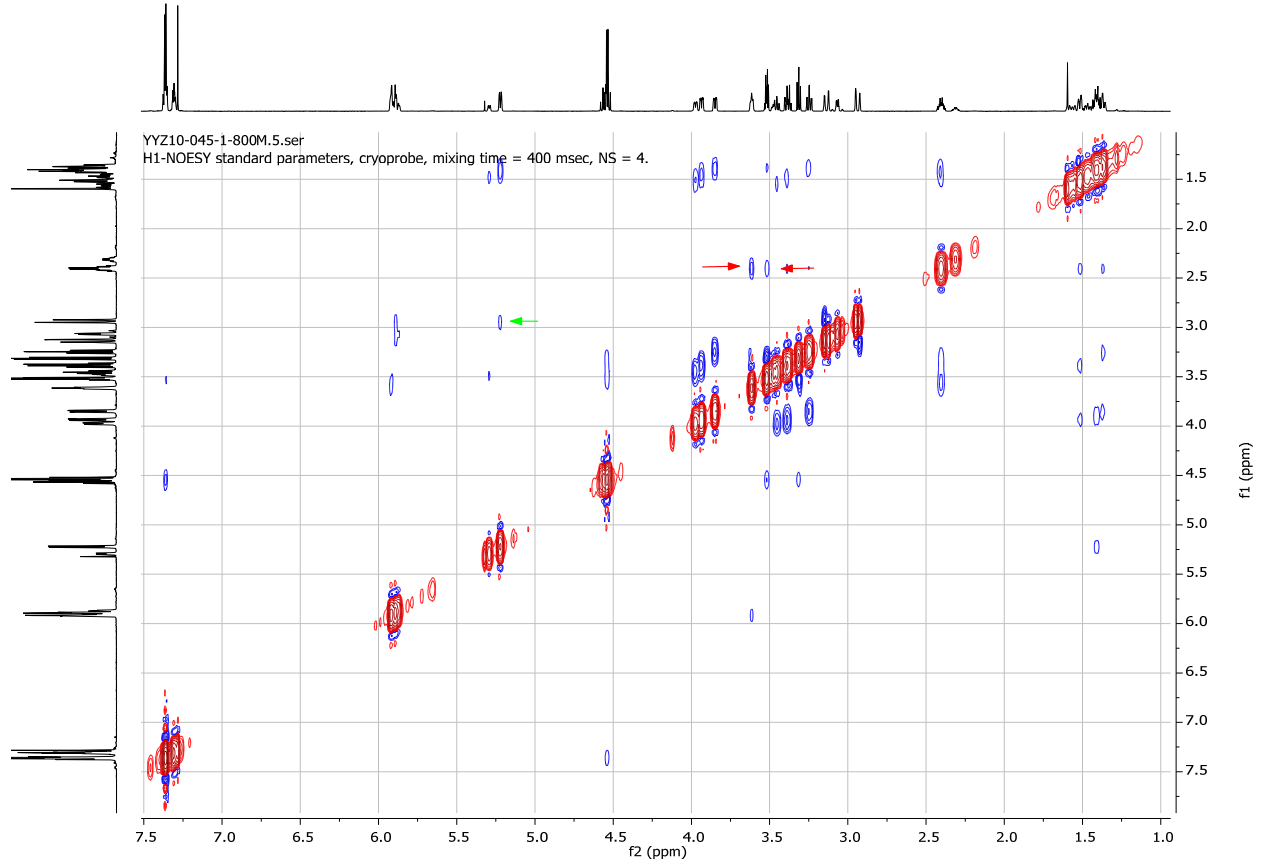

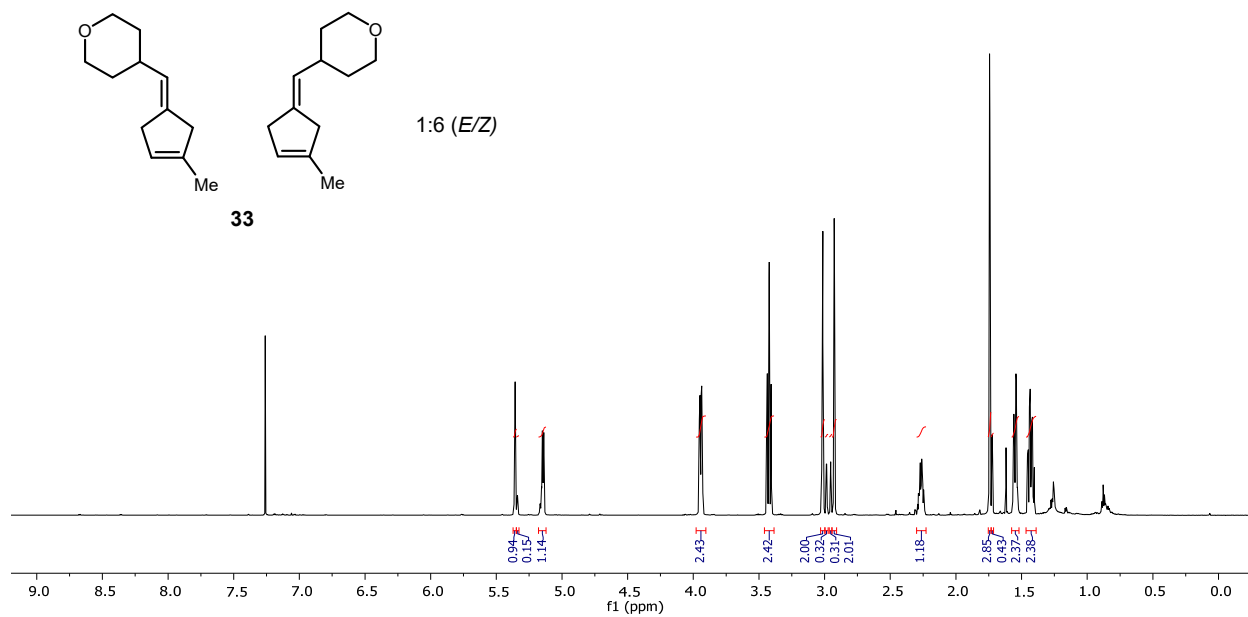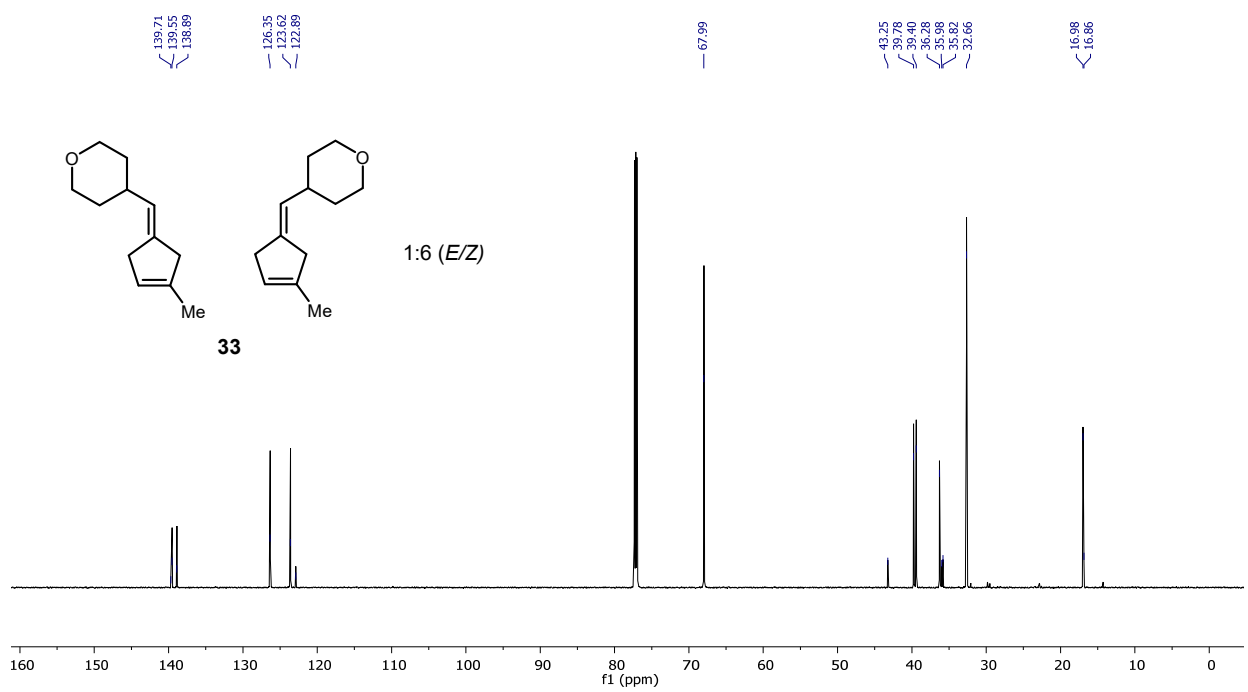



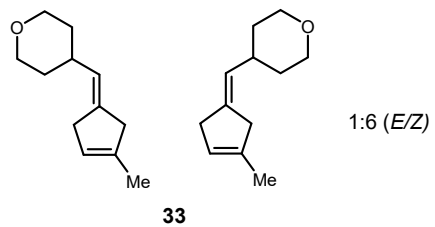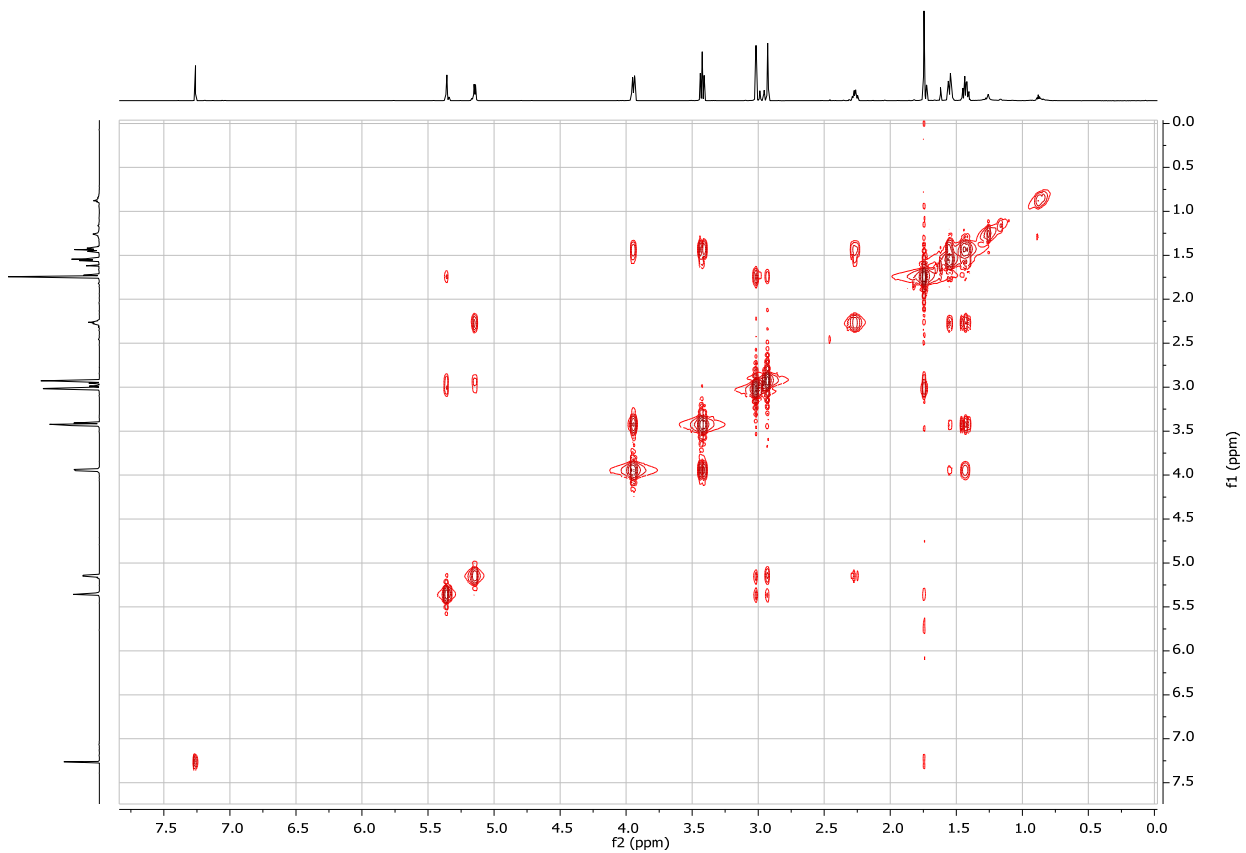

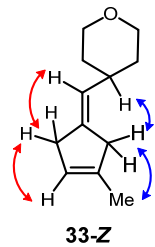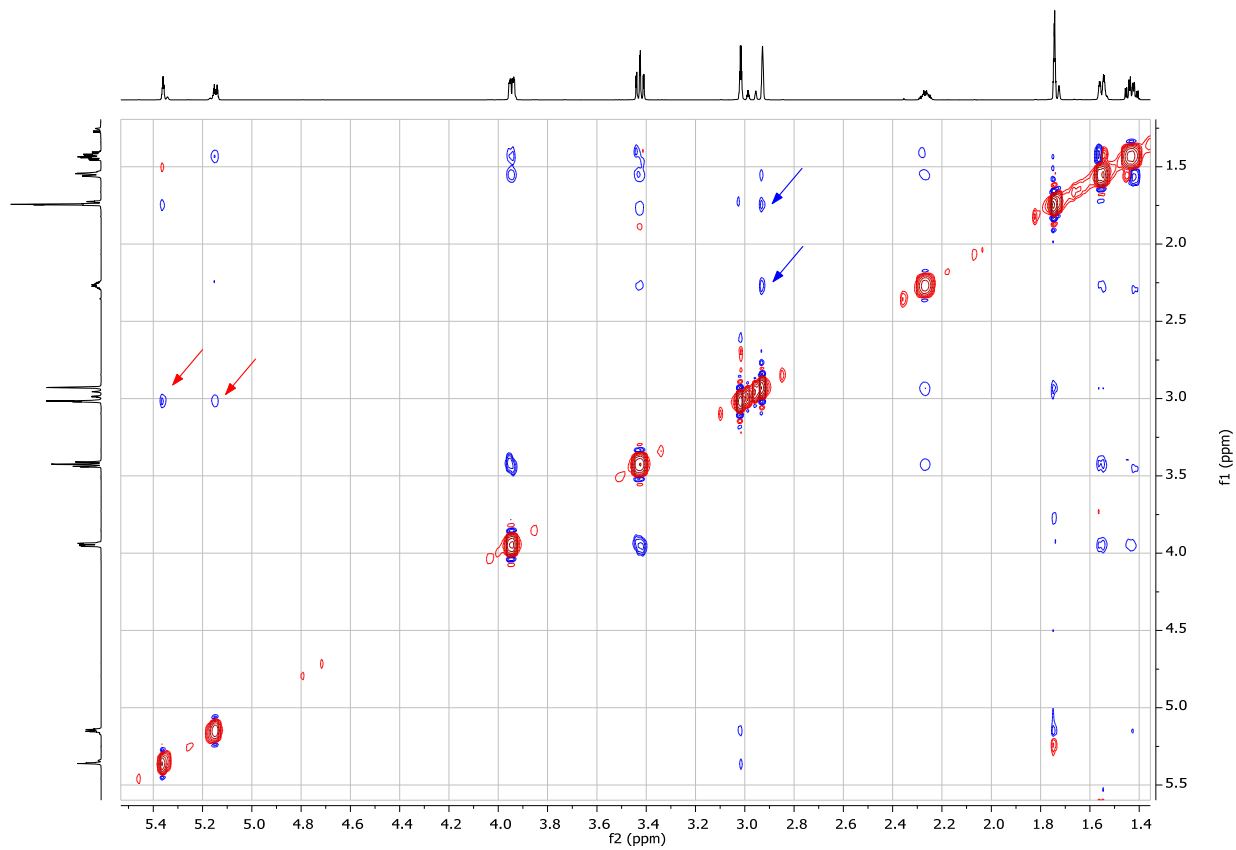

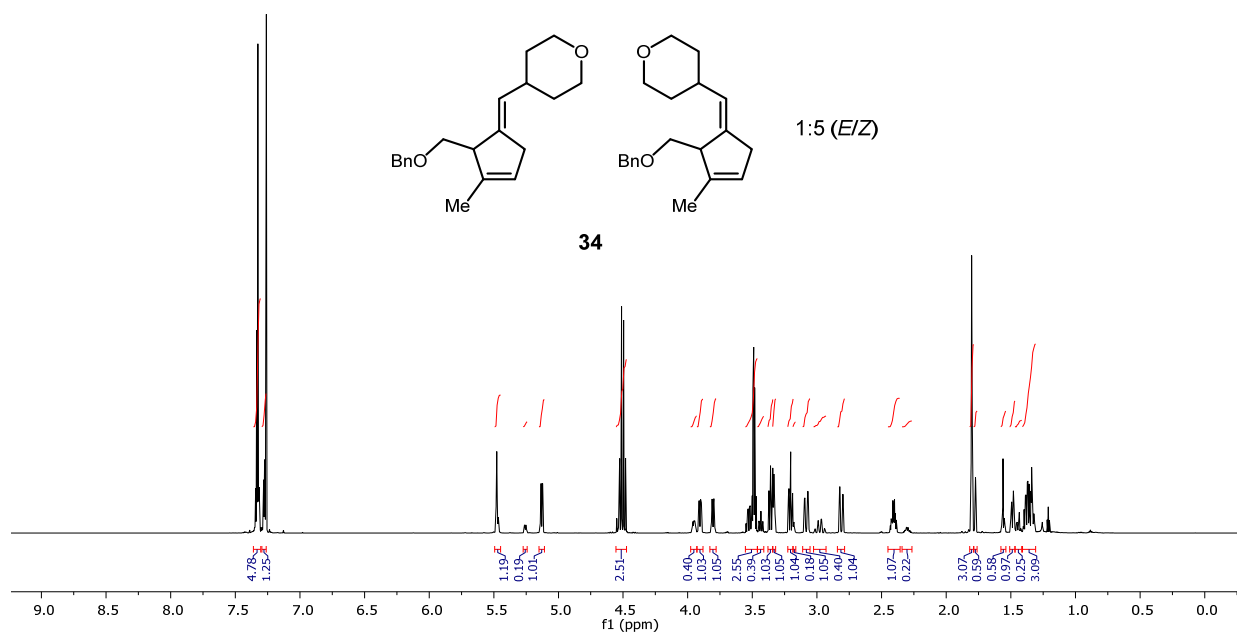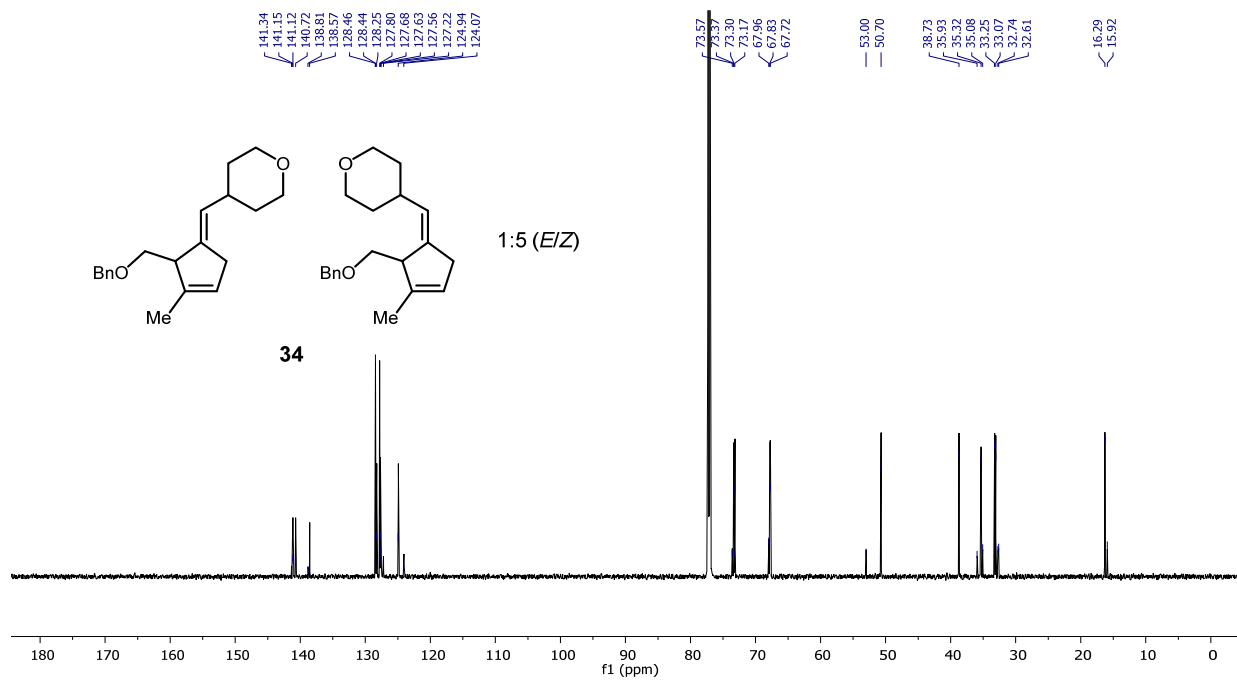

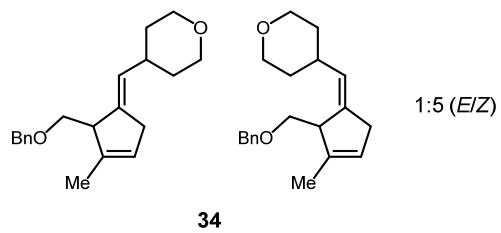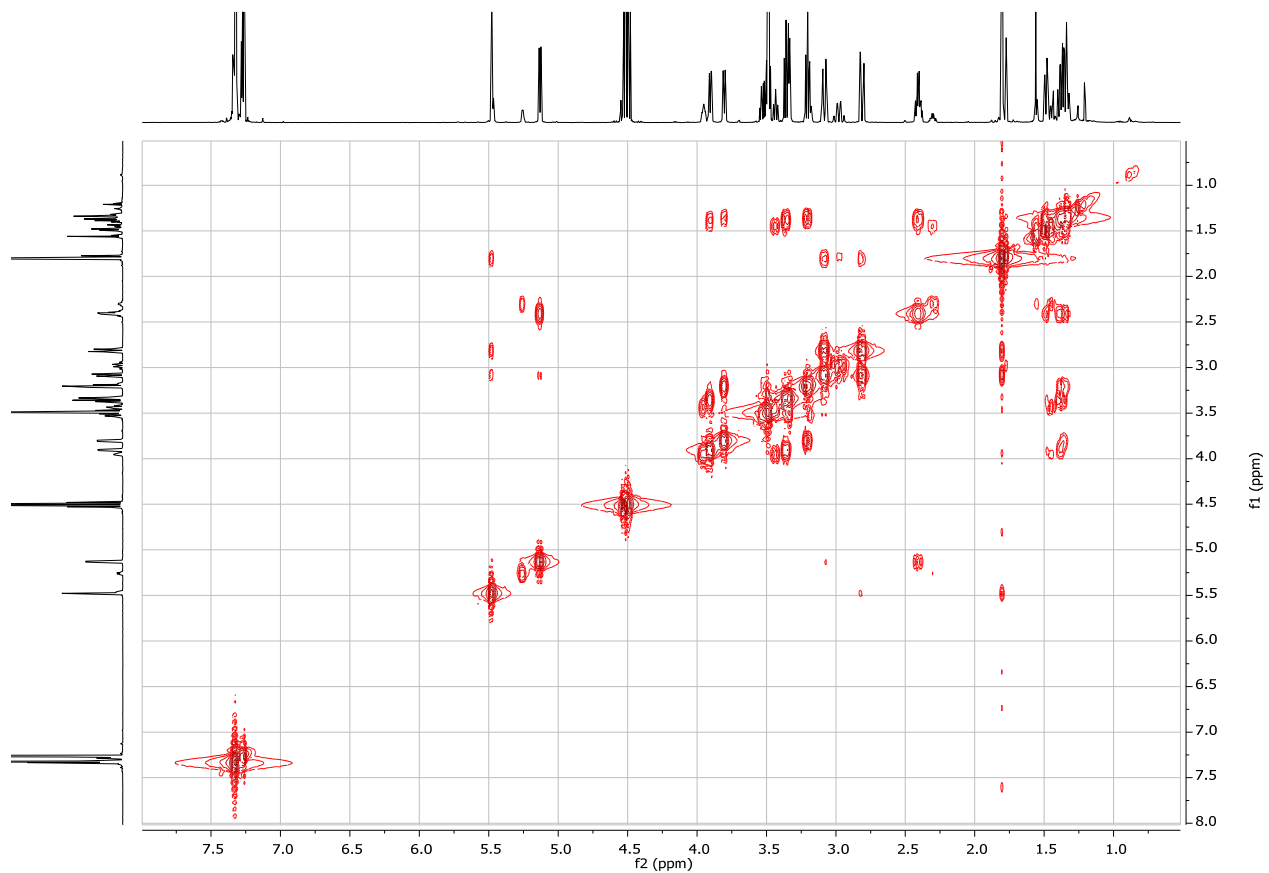

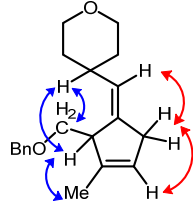

34-Z

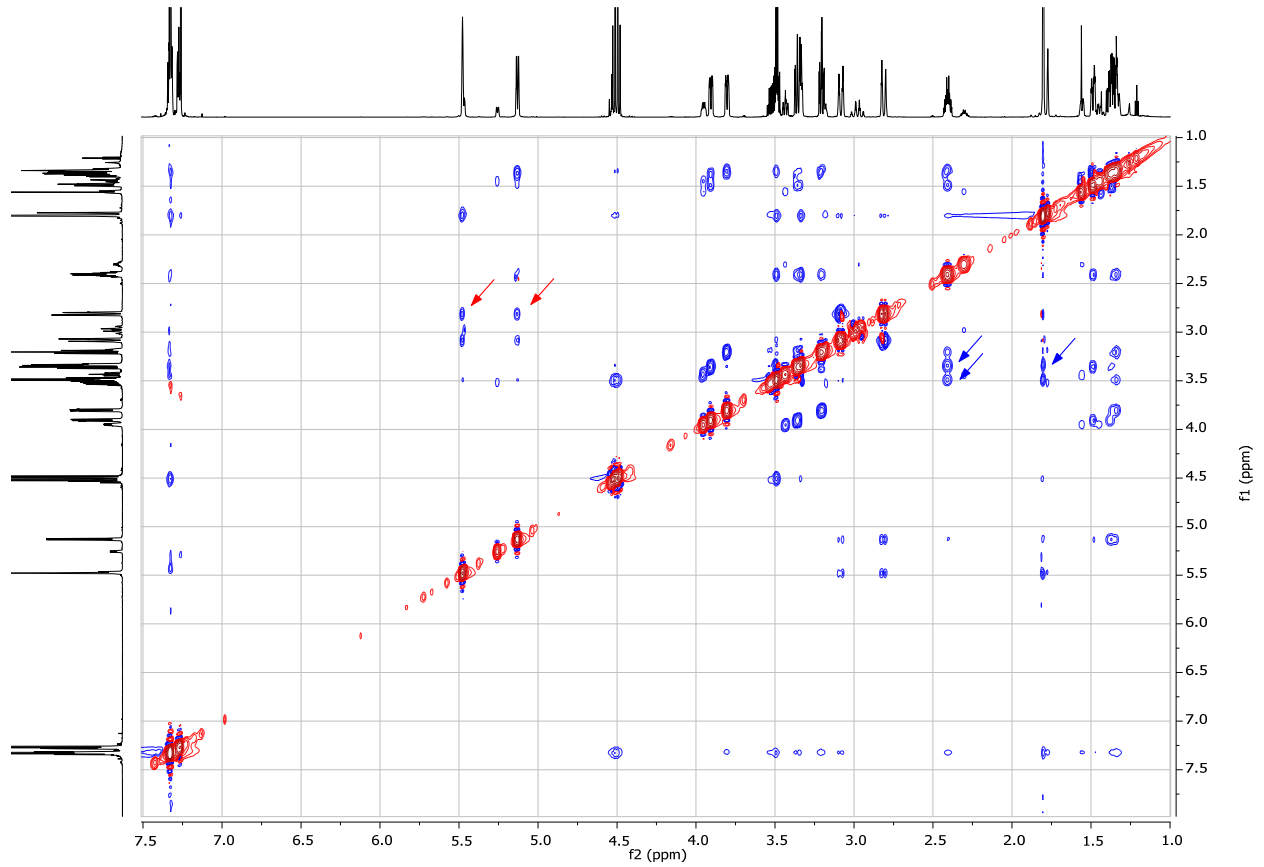

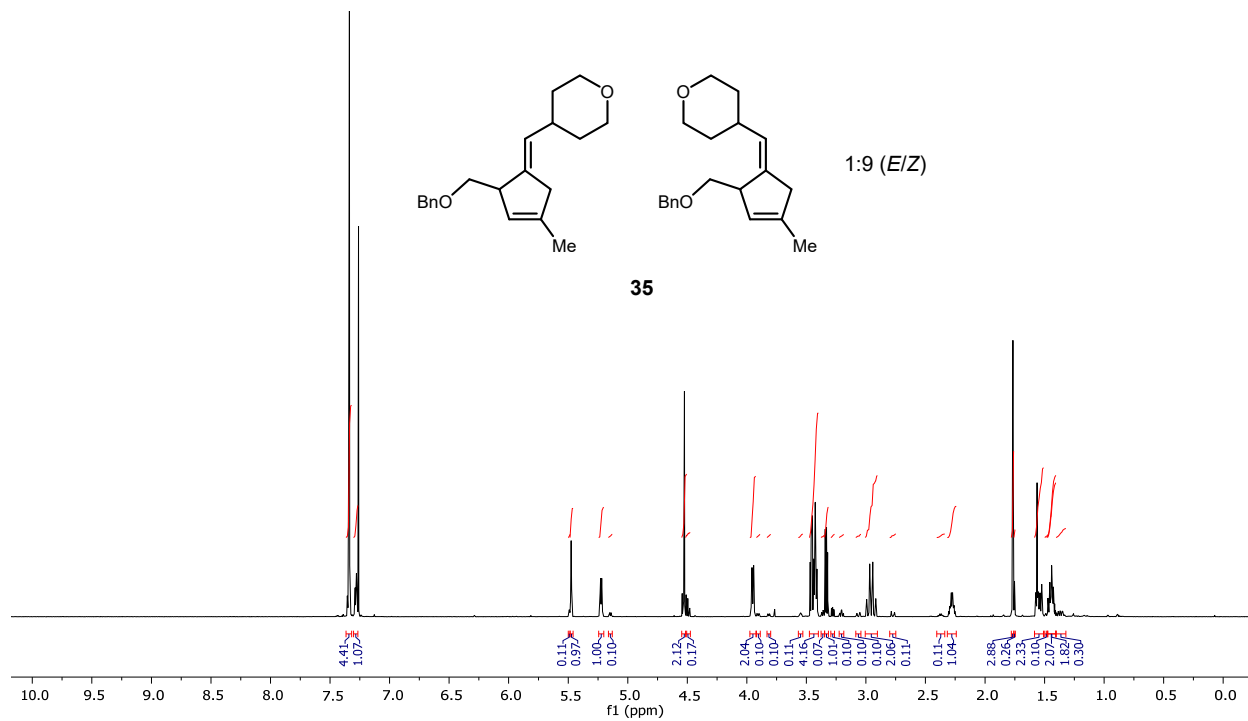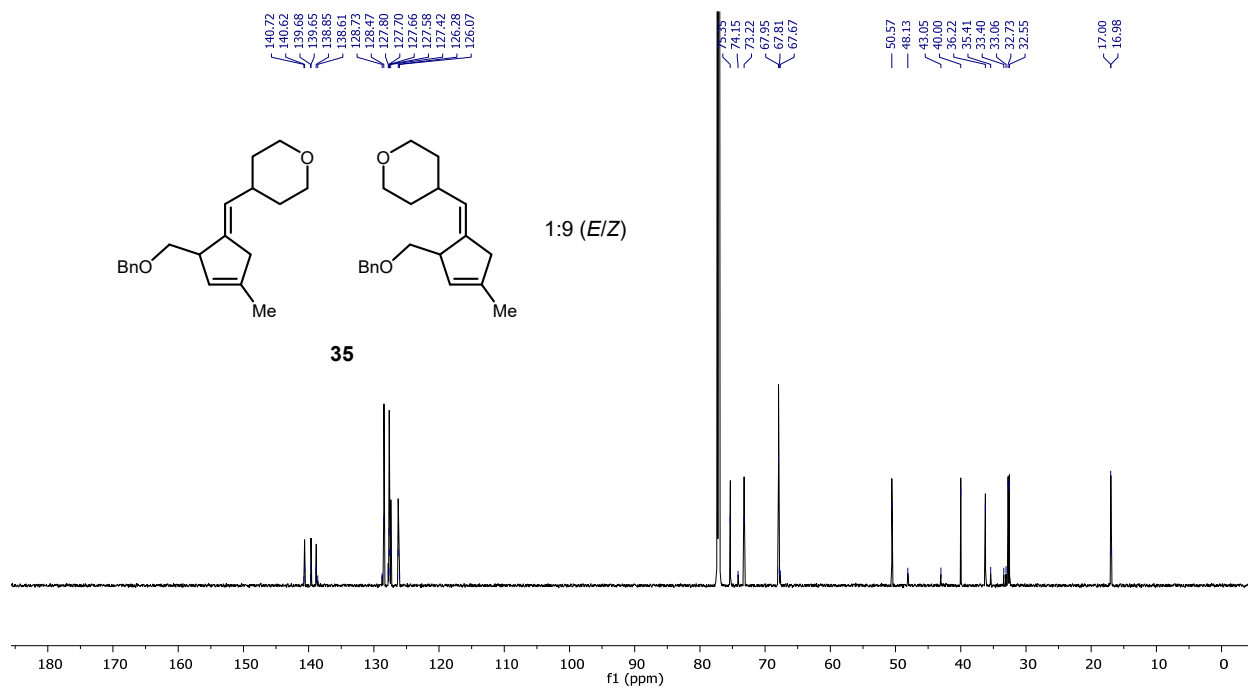

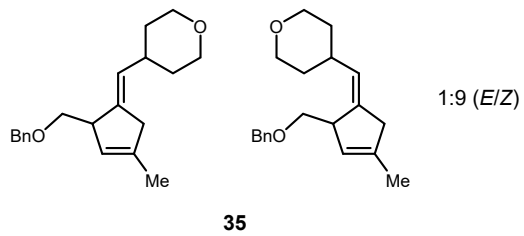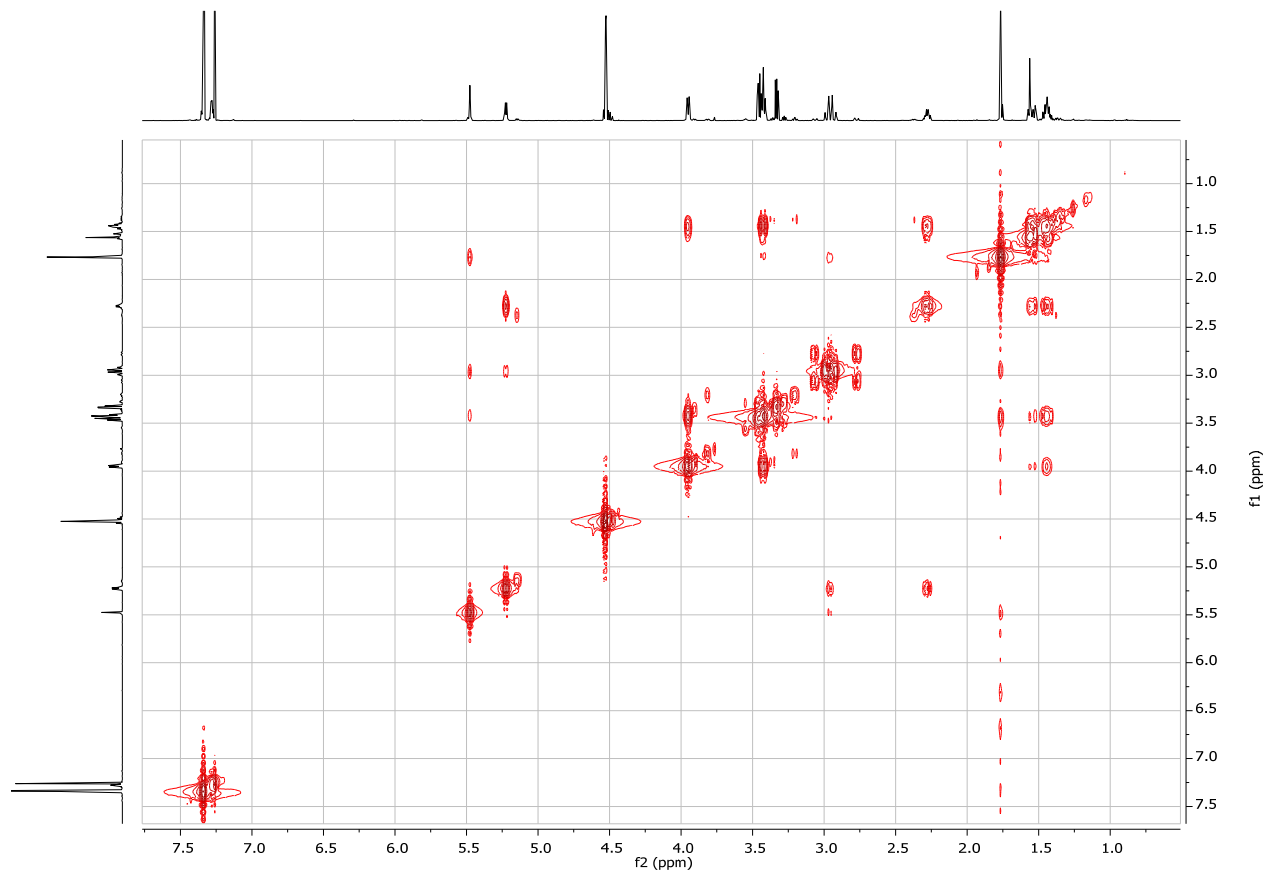

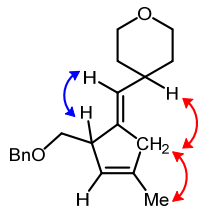

**35-E**

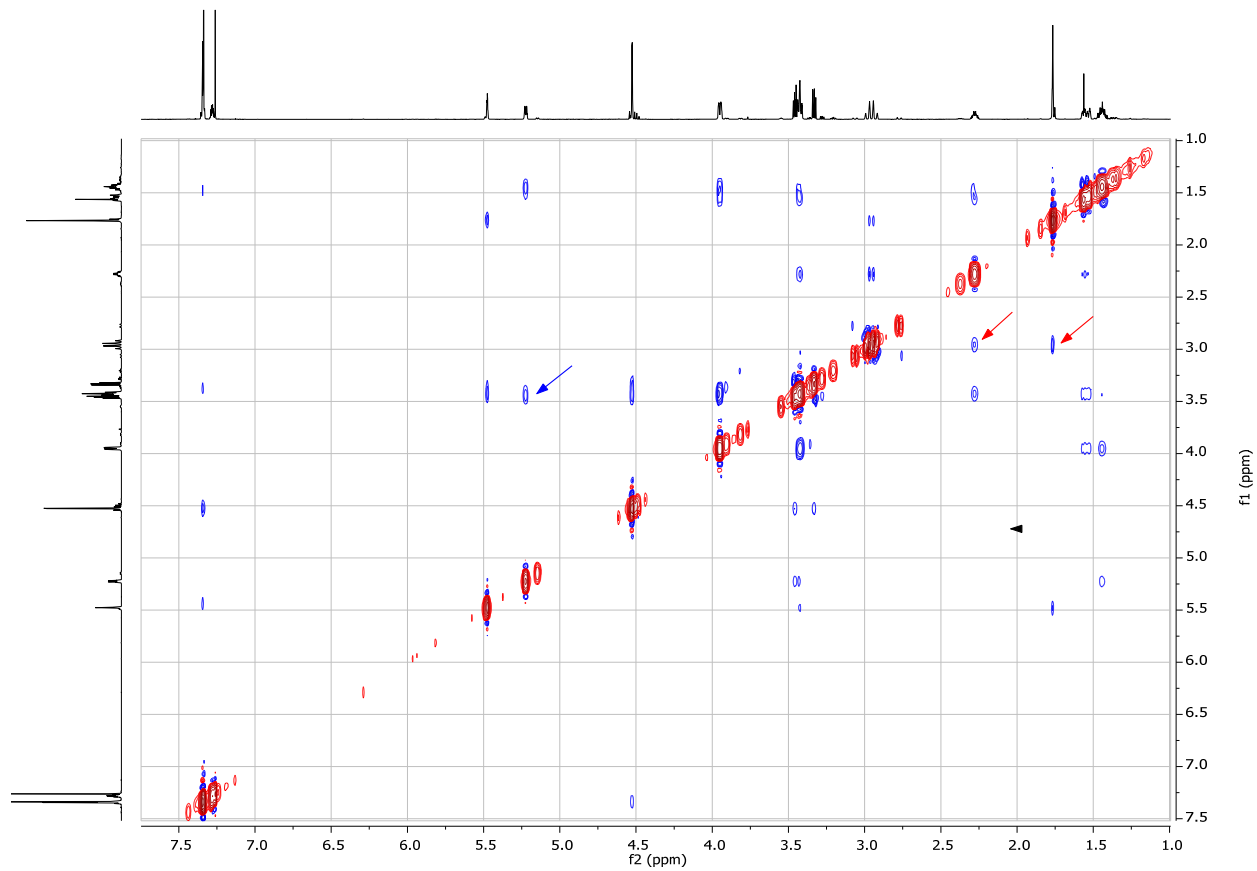



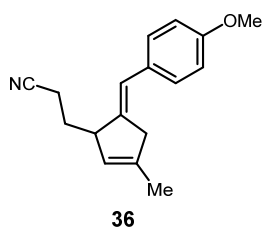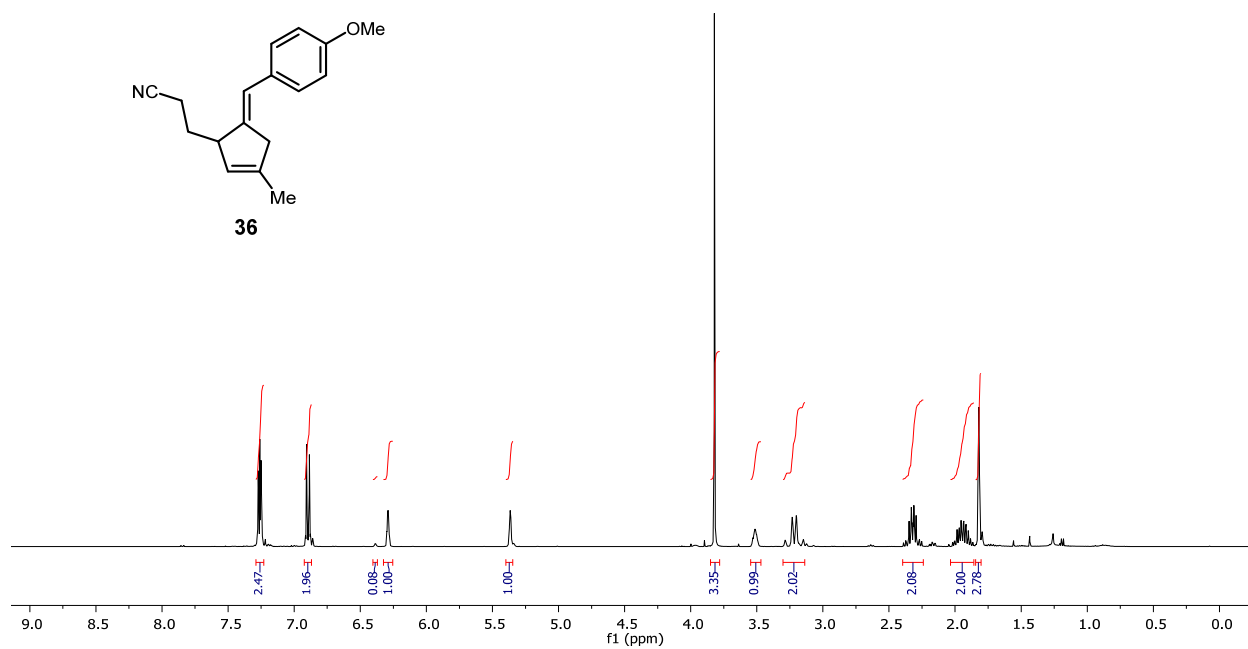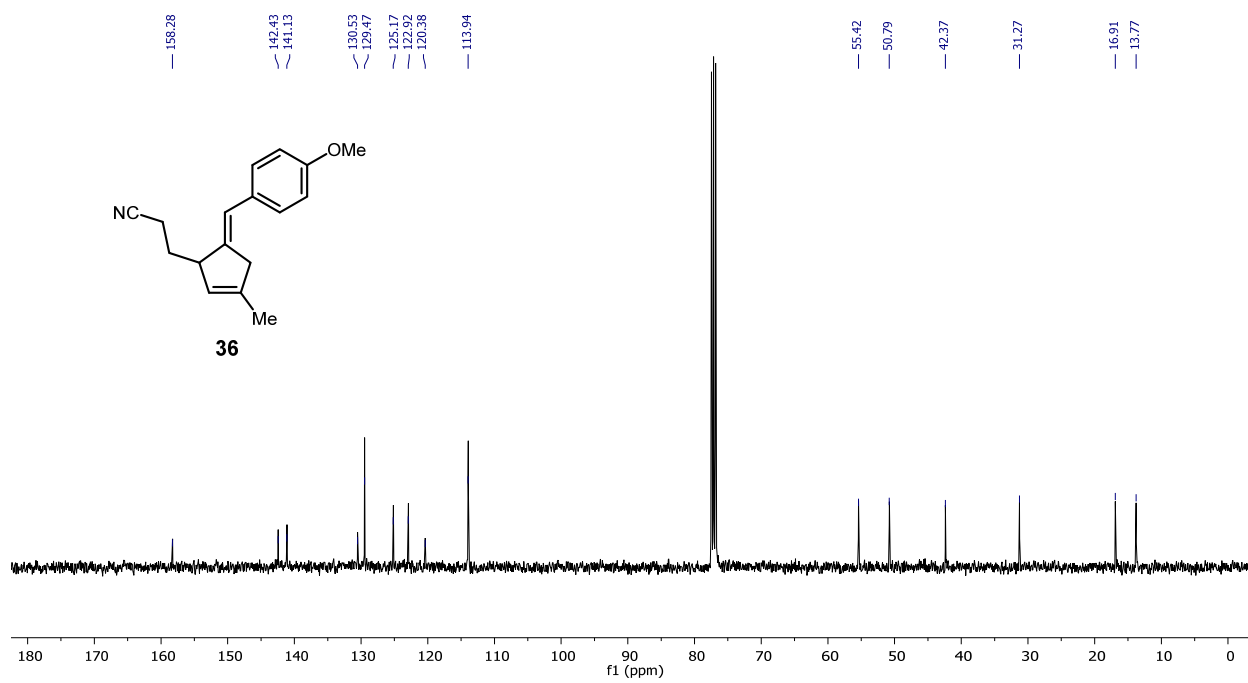

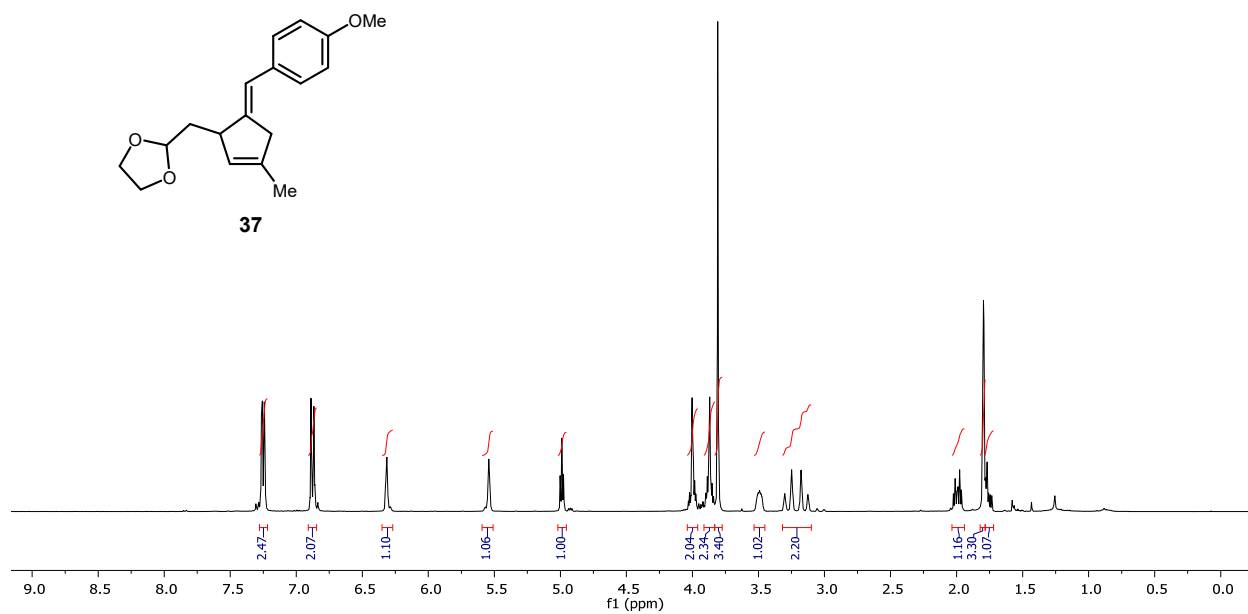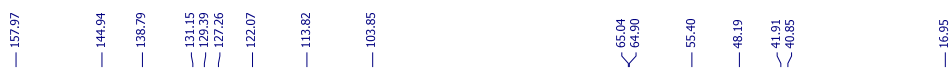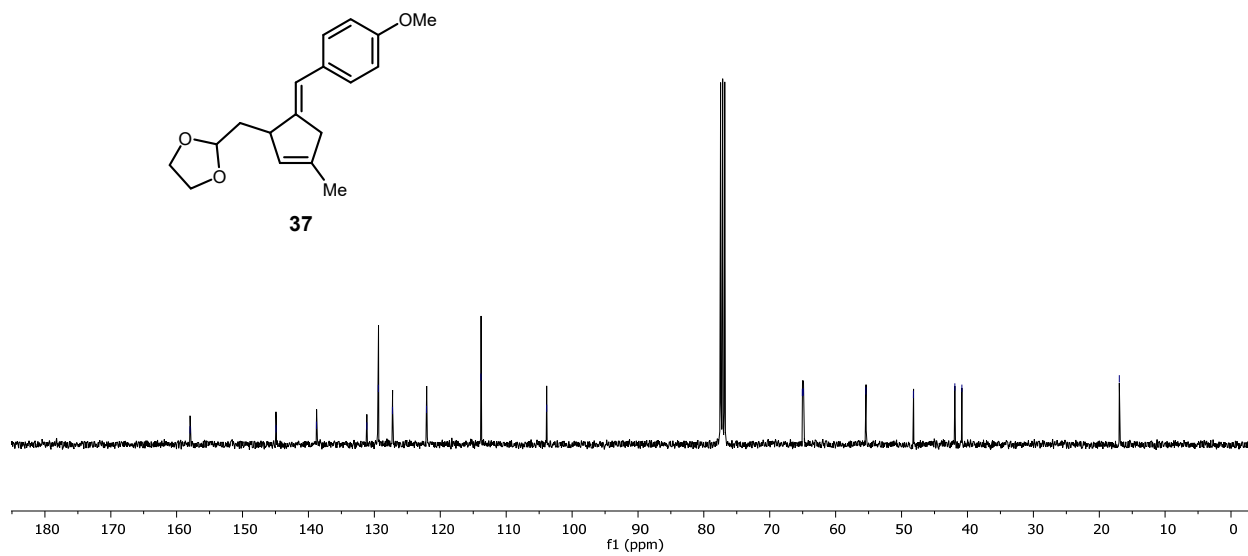

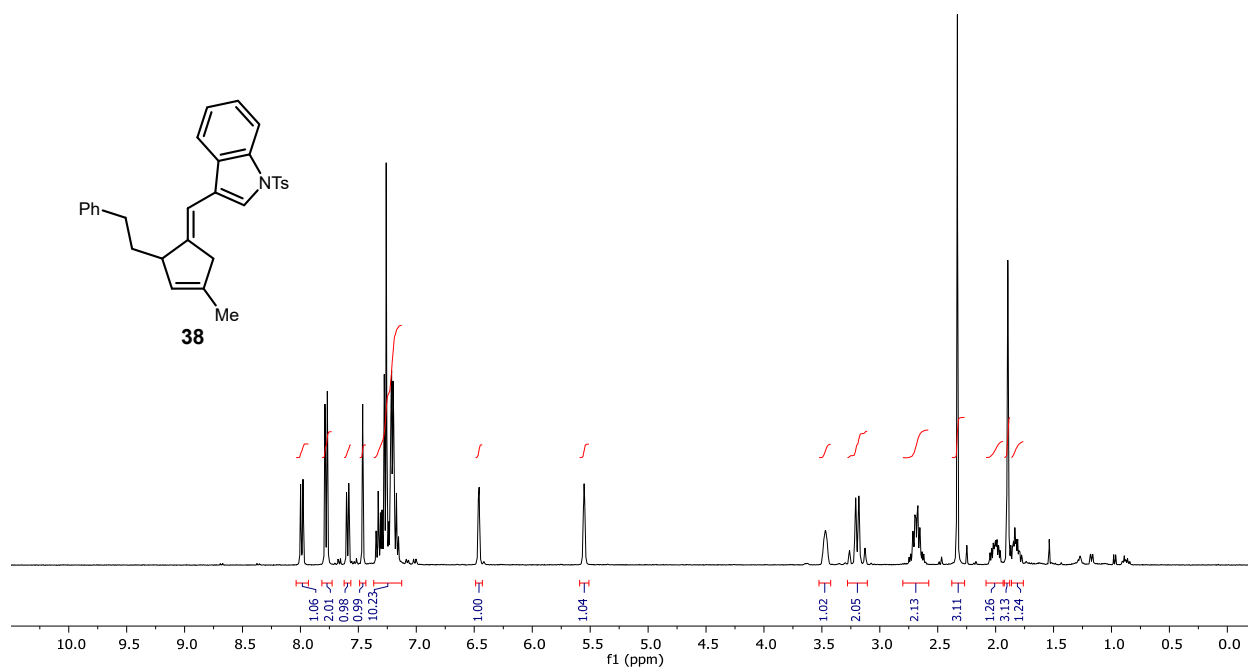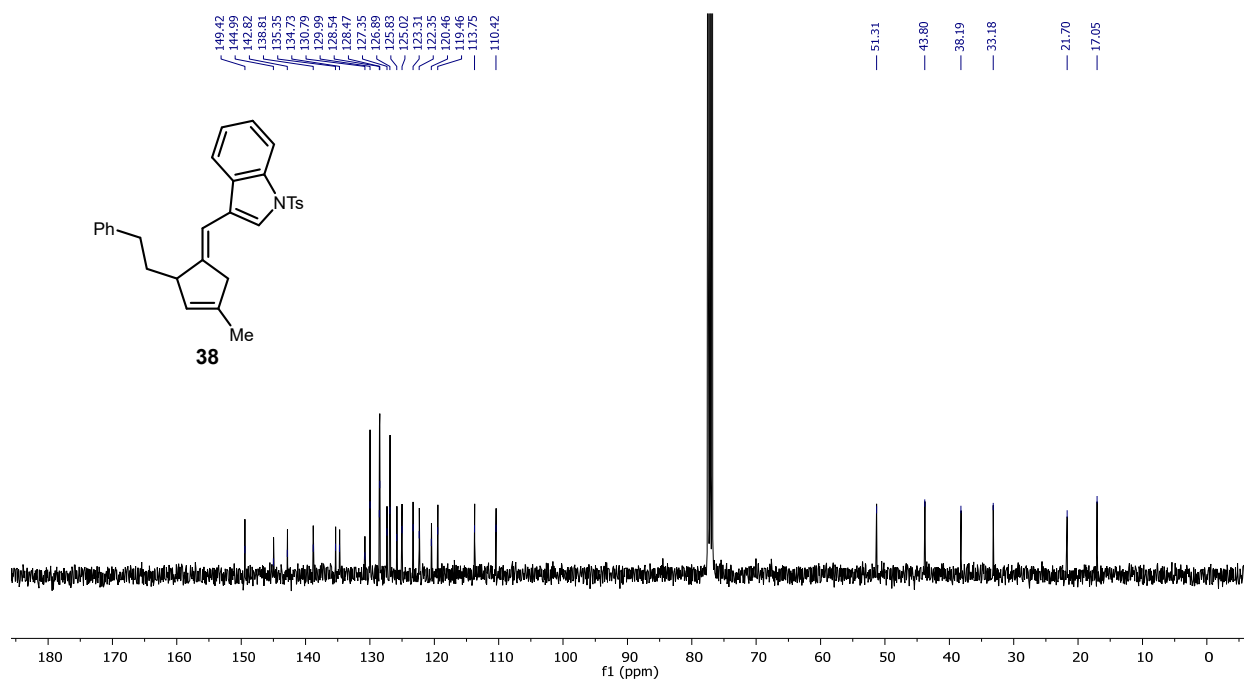

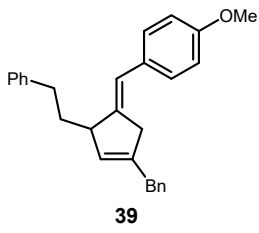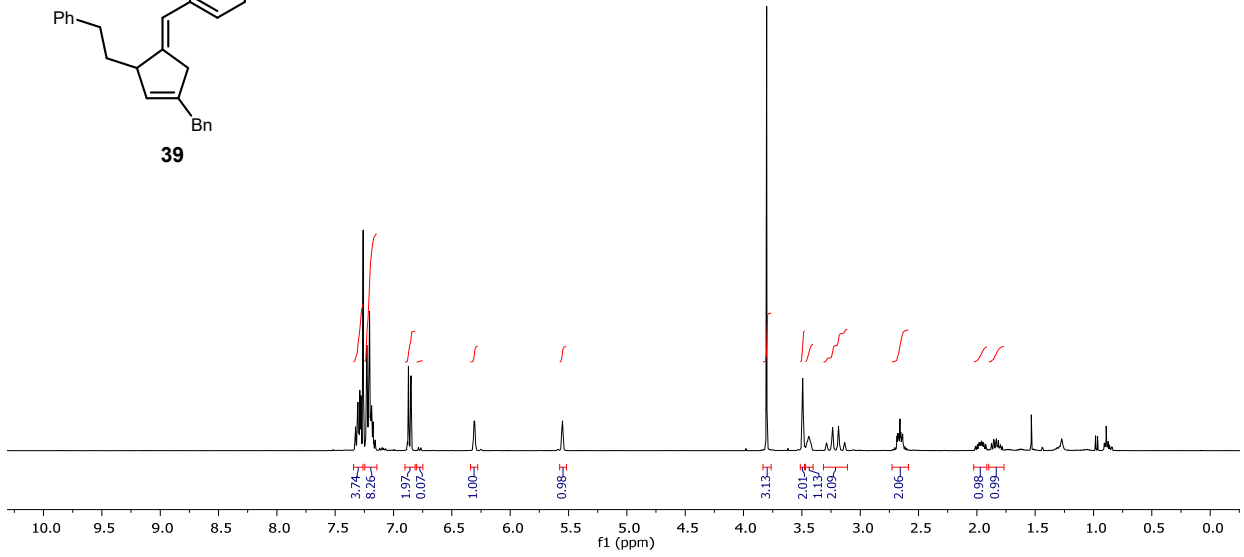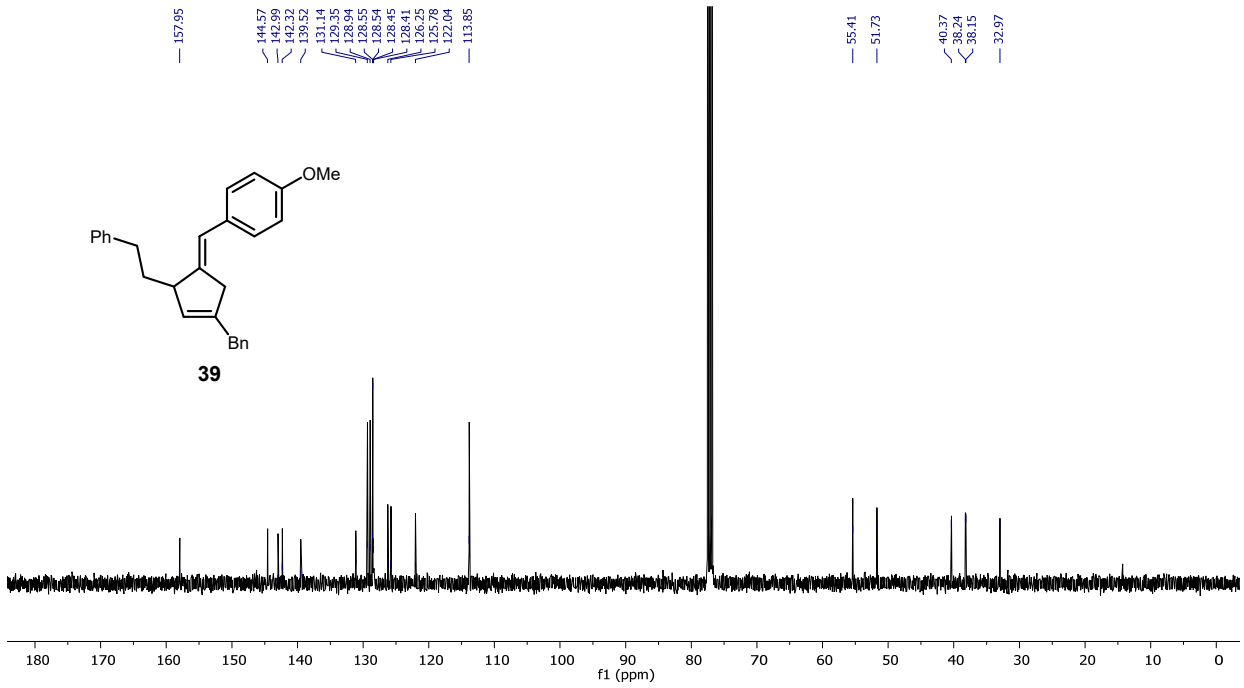

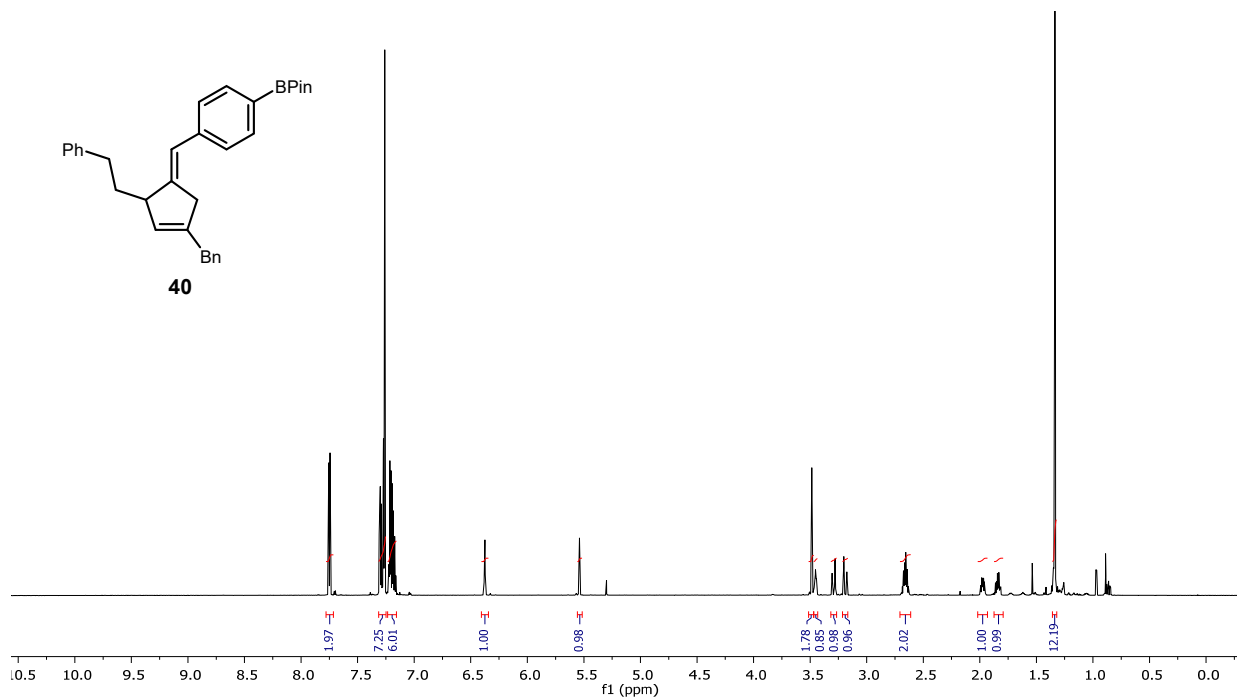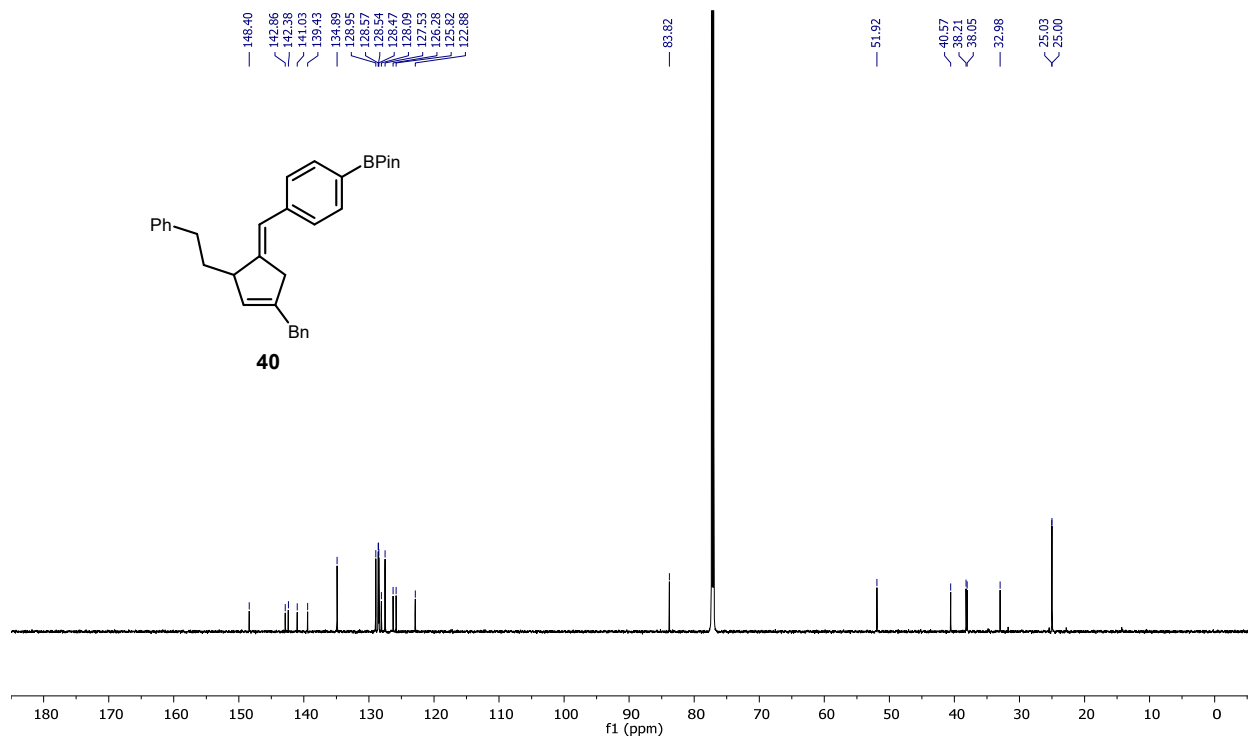

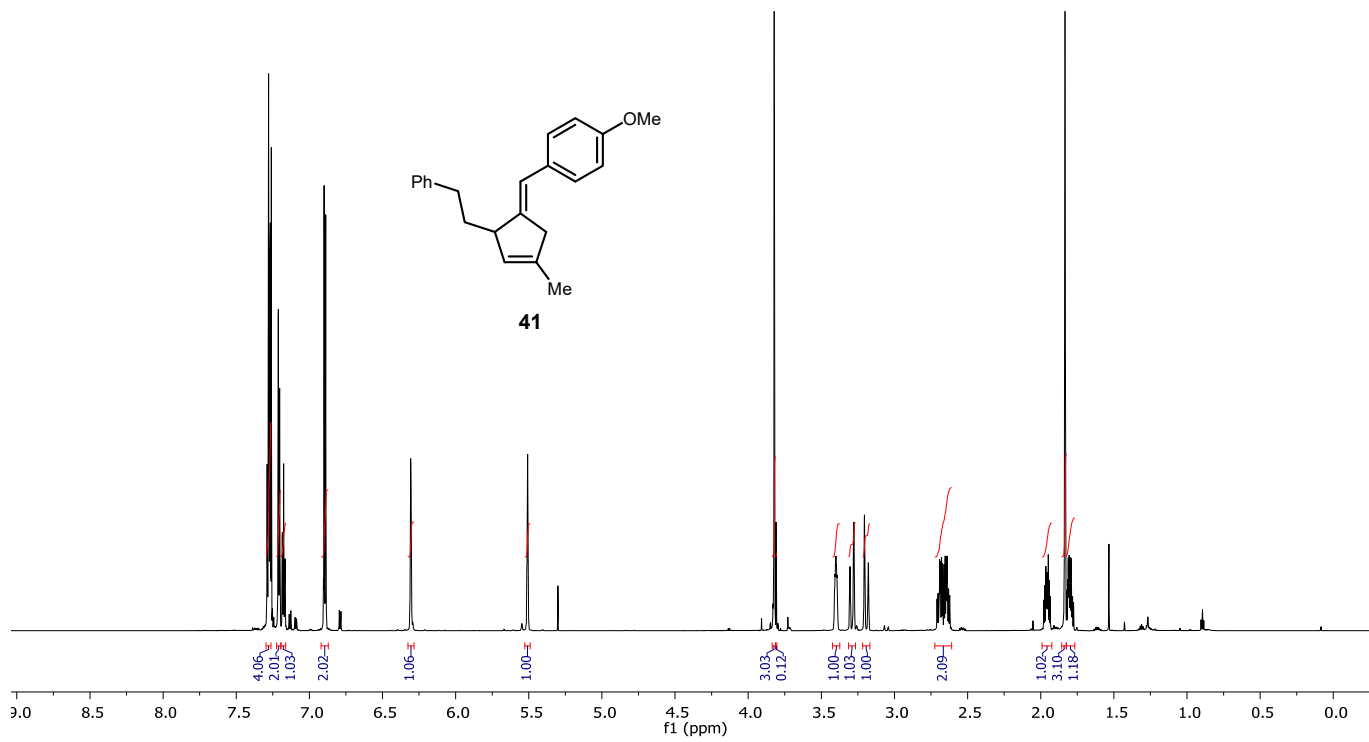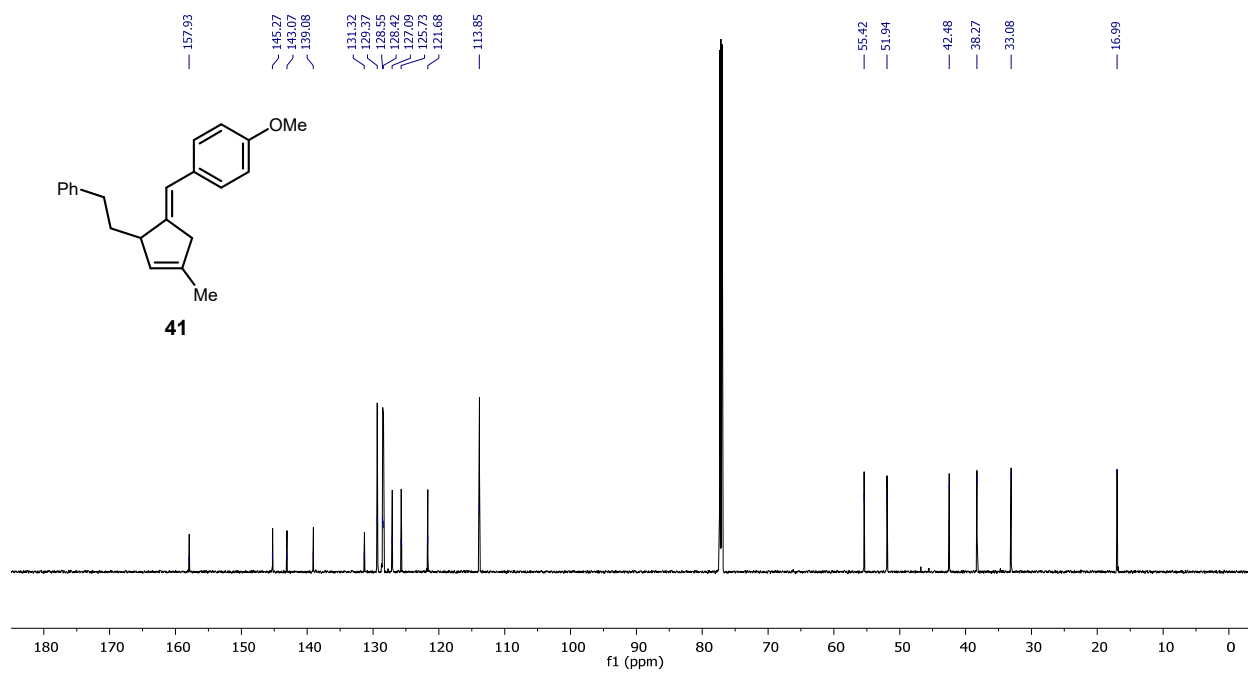

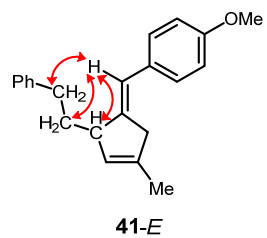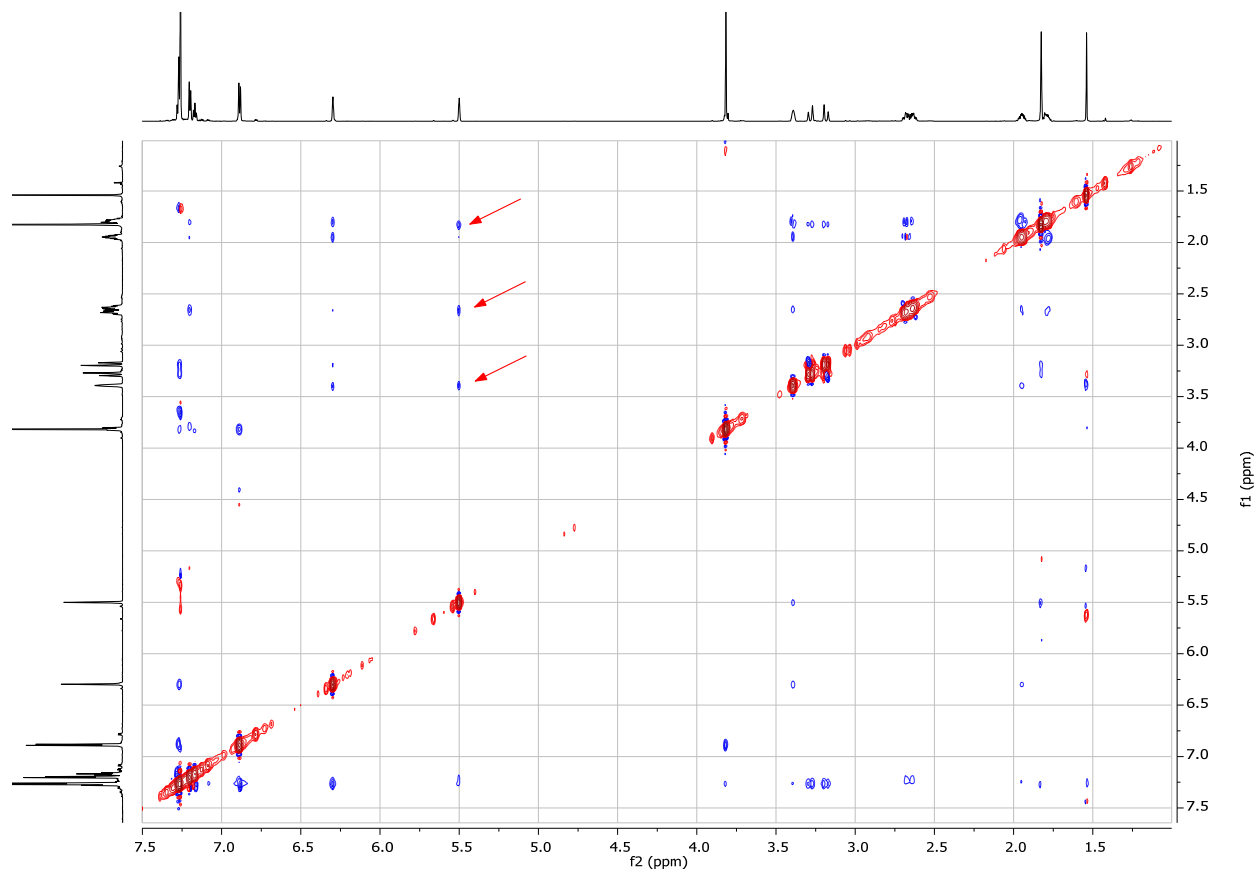

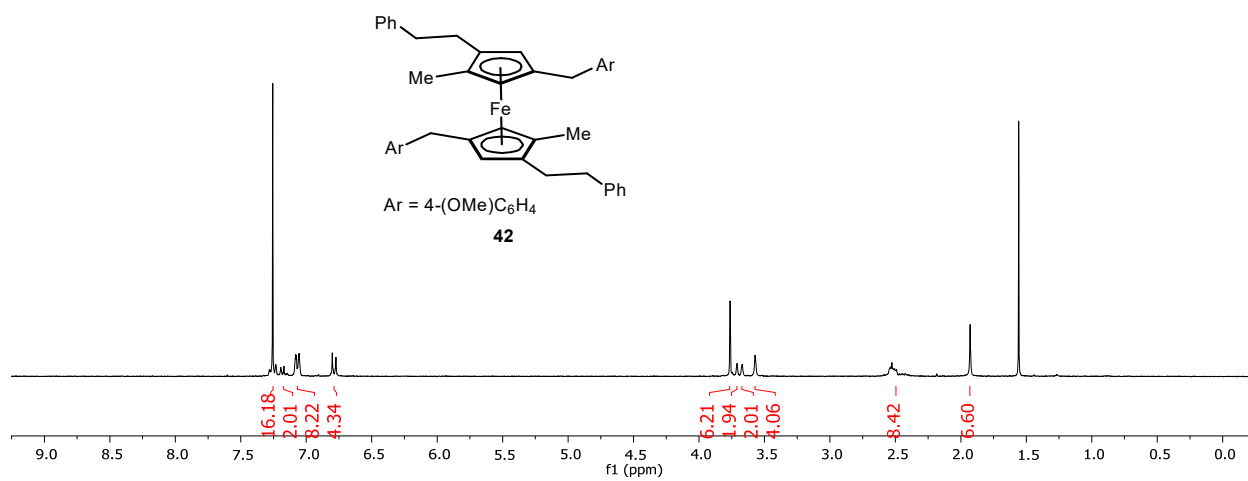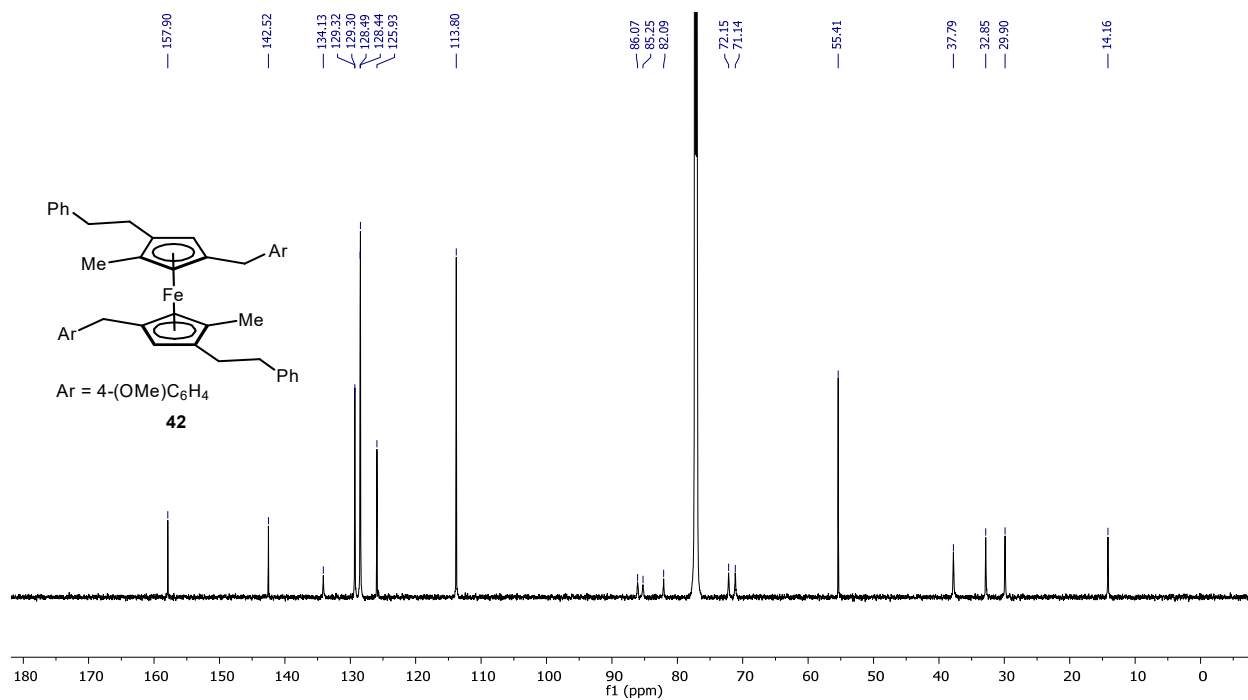



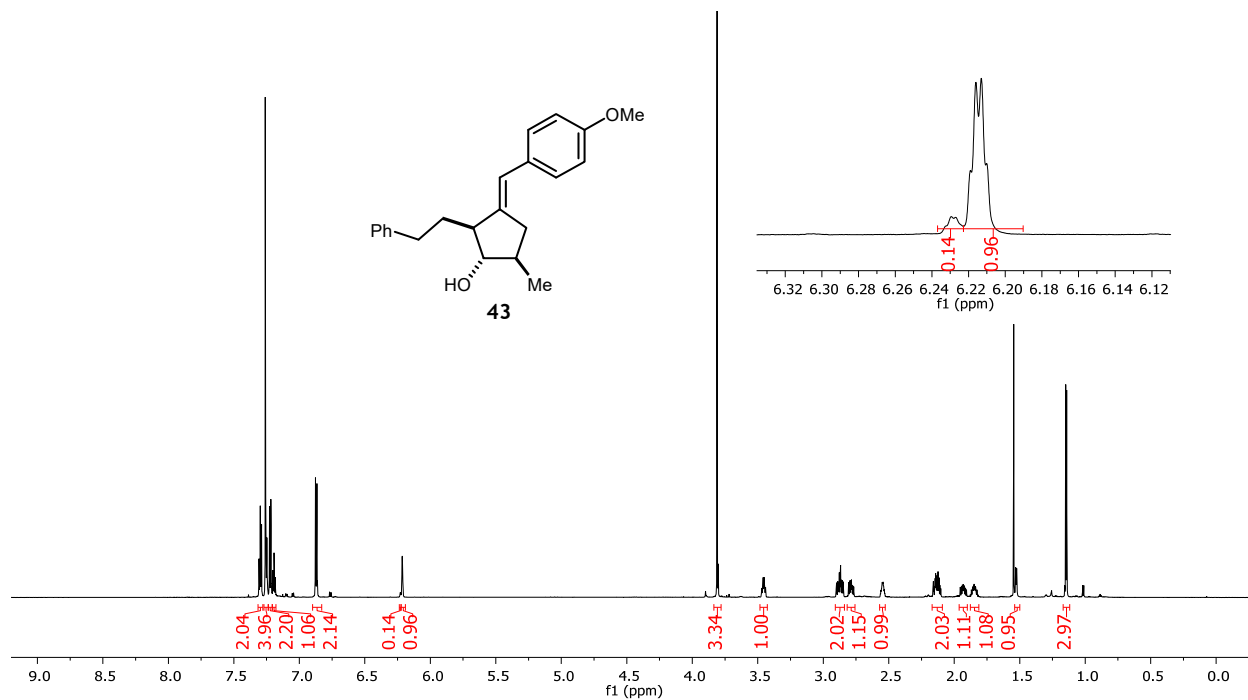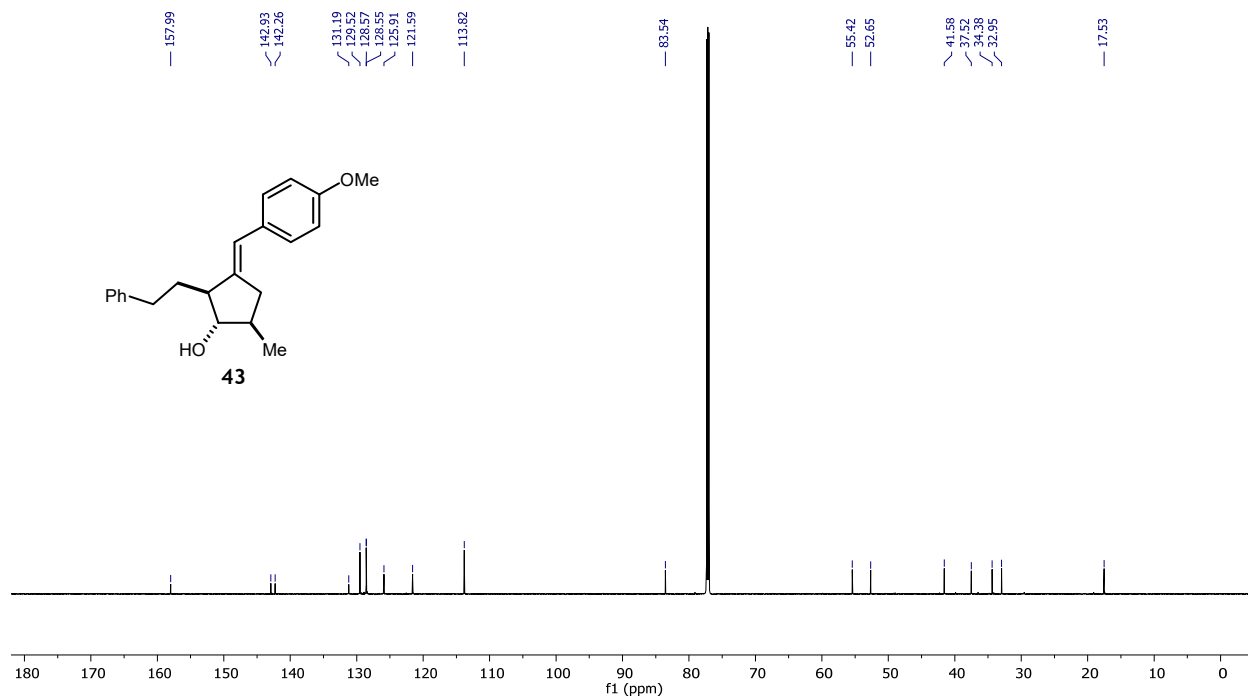

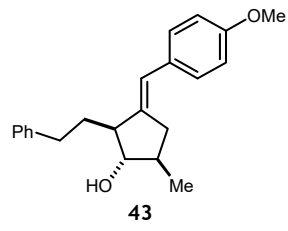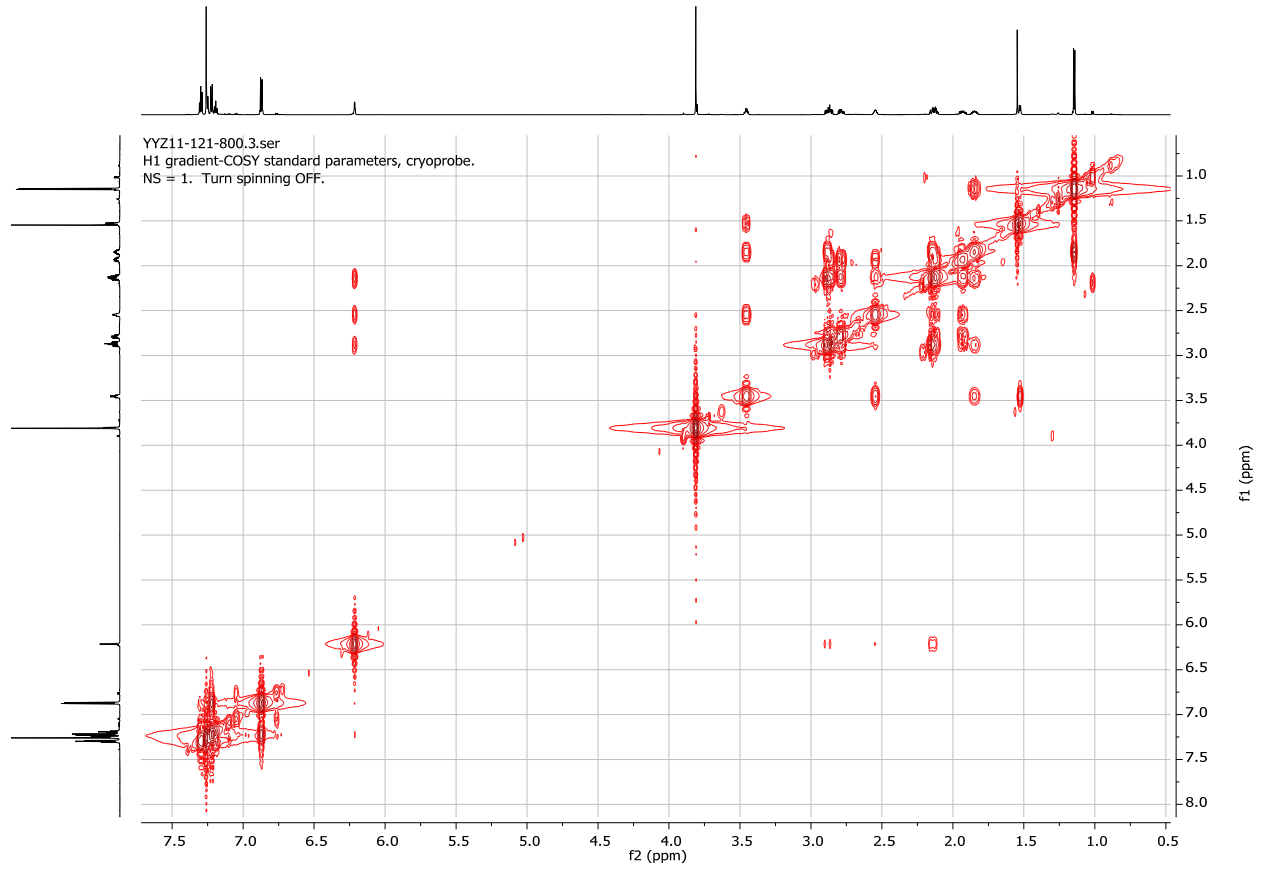

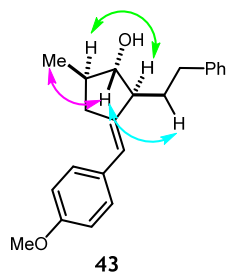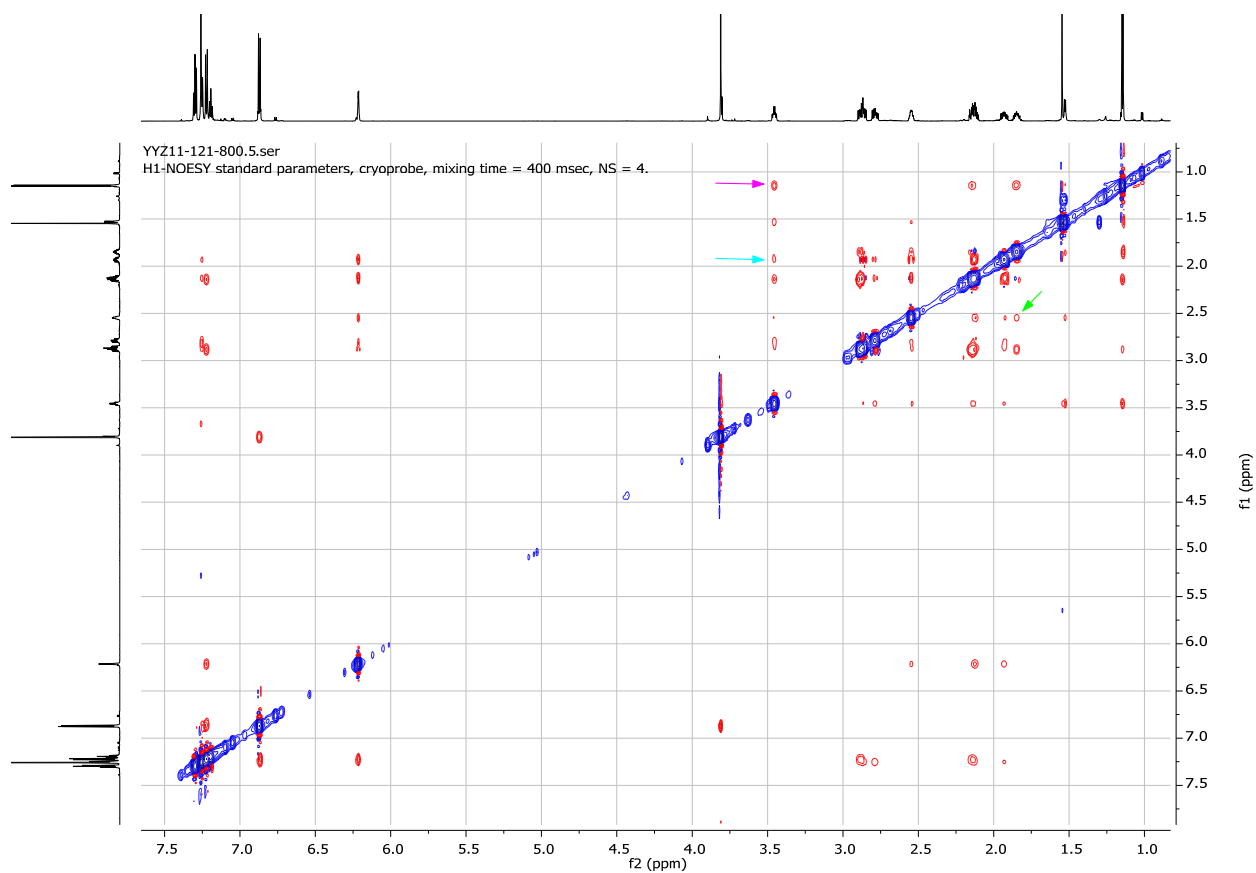

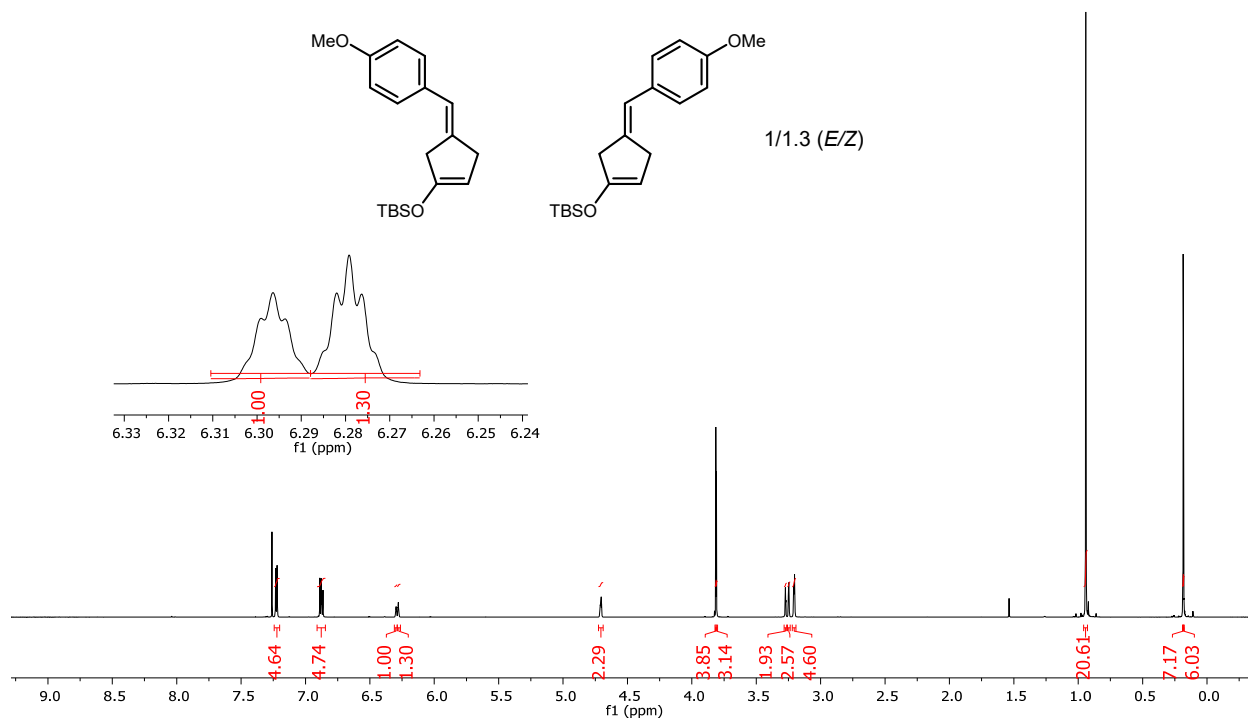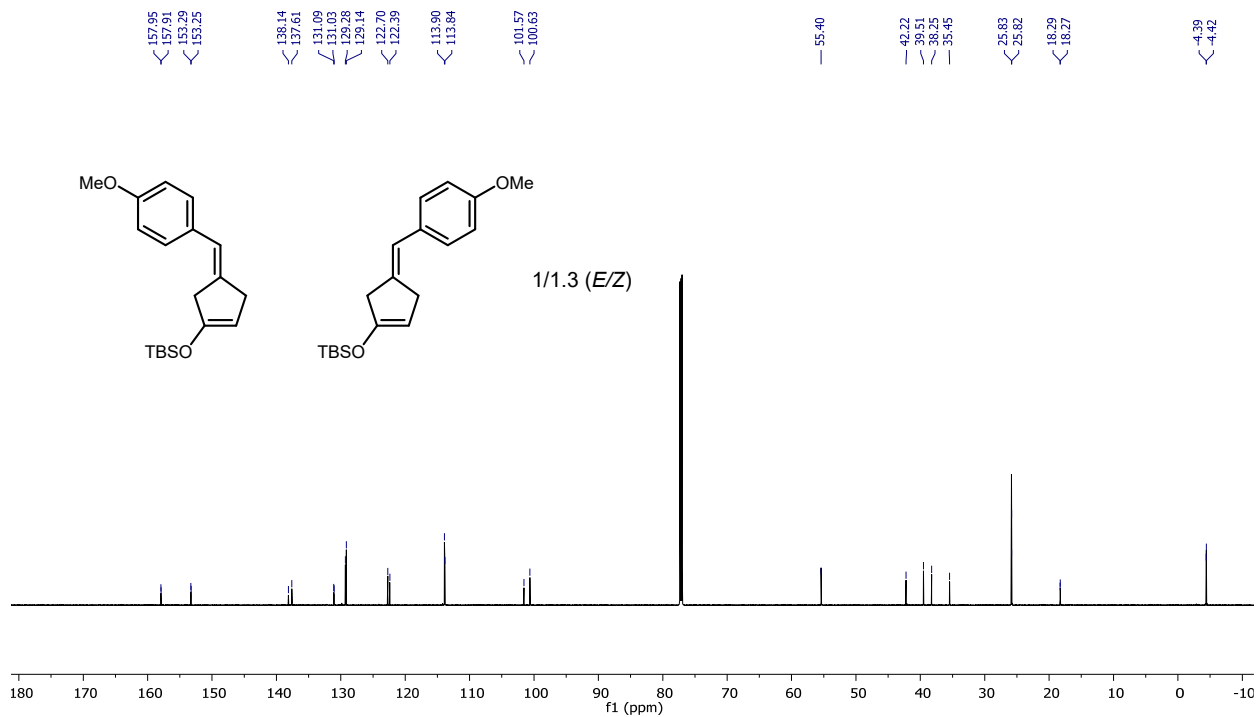

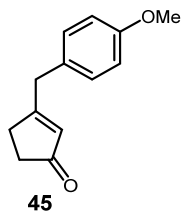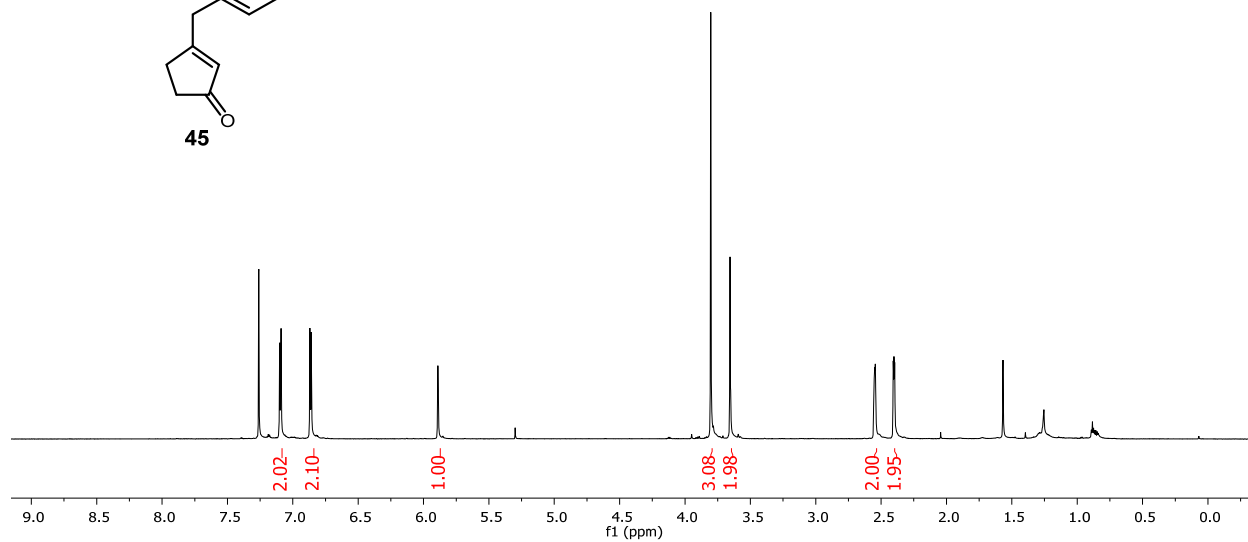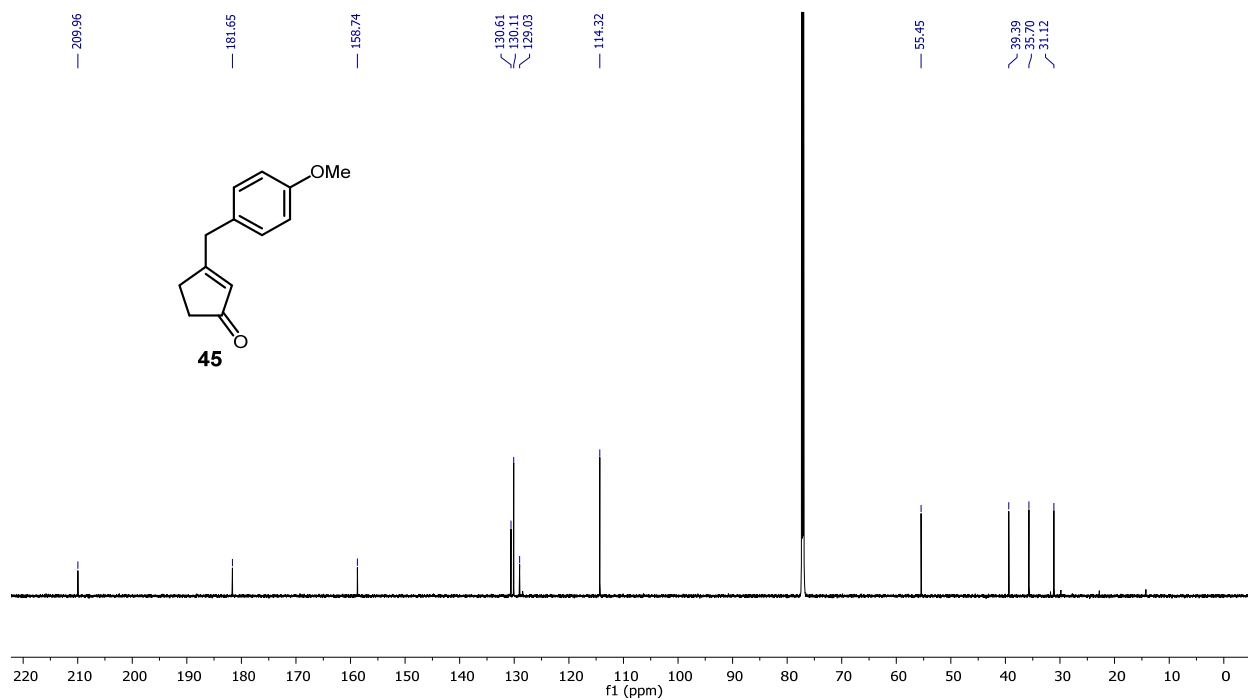

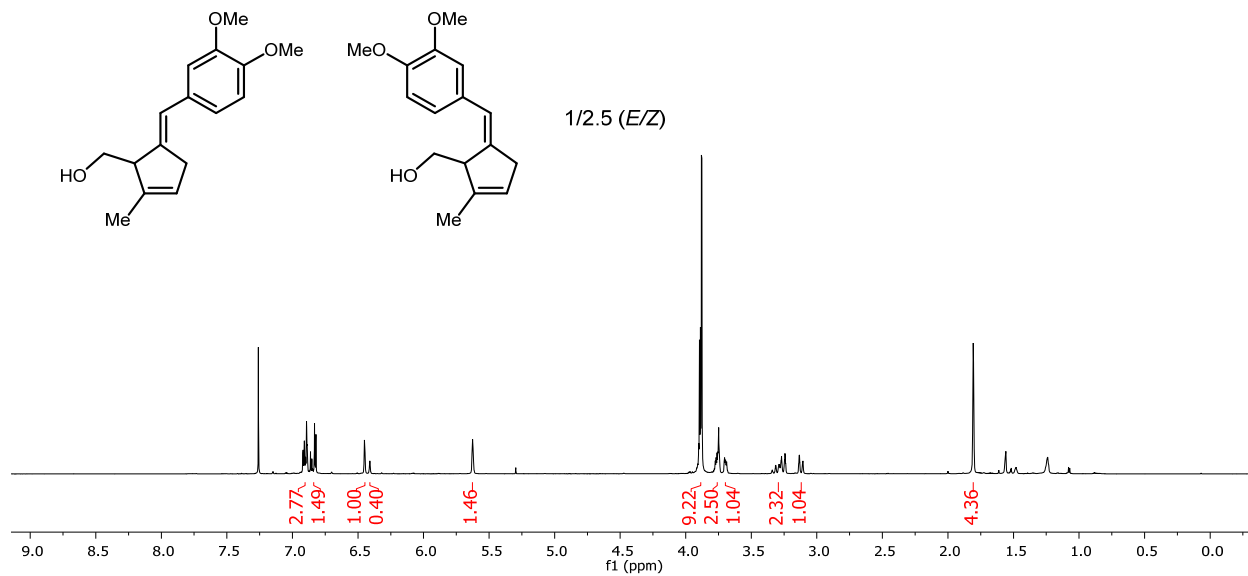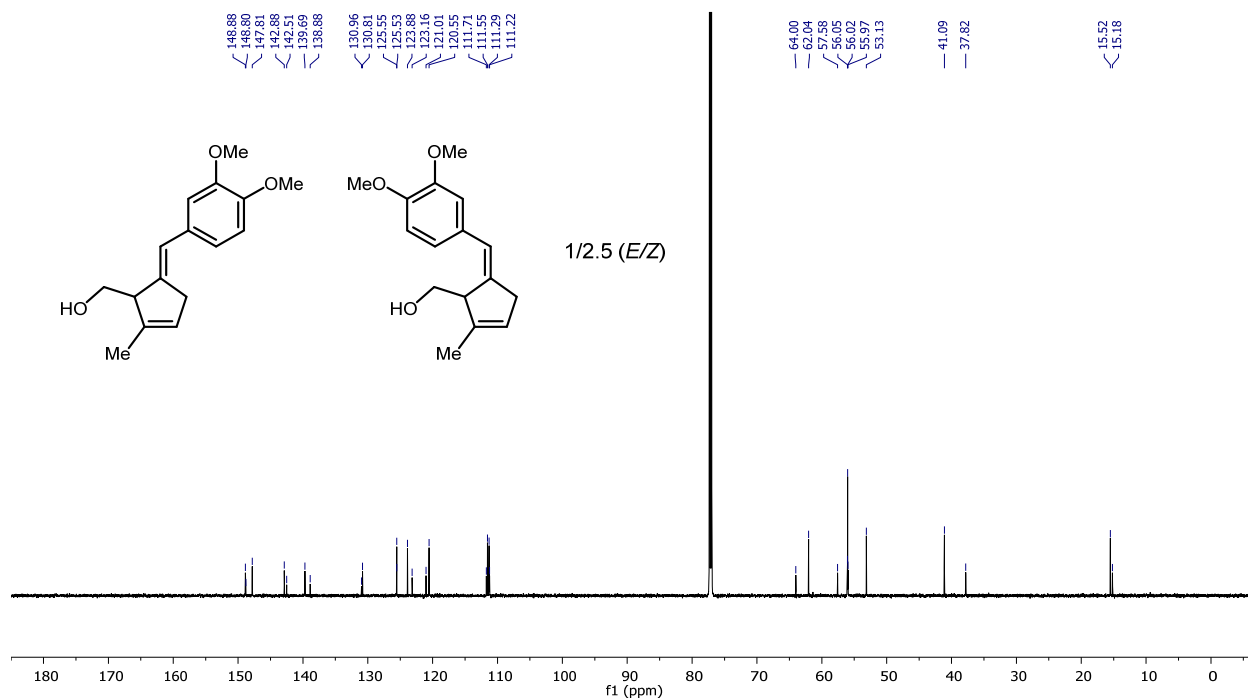

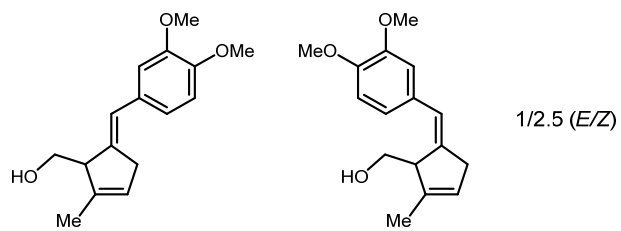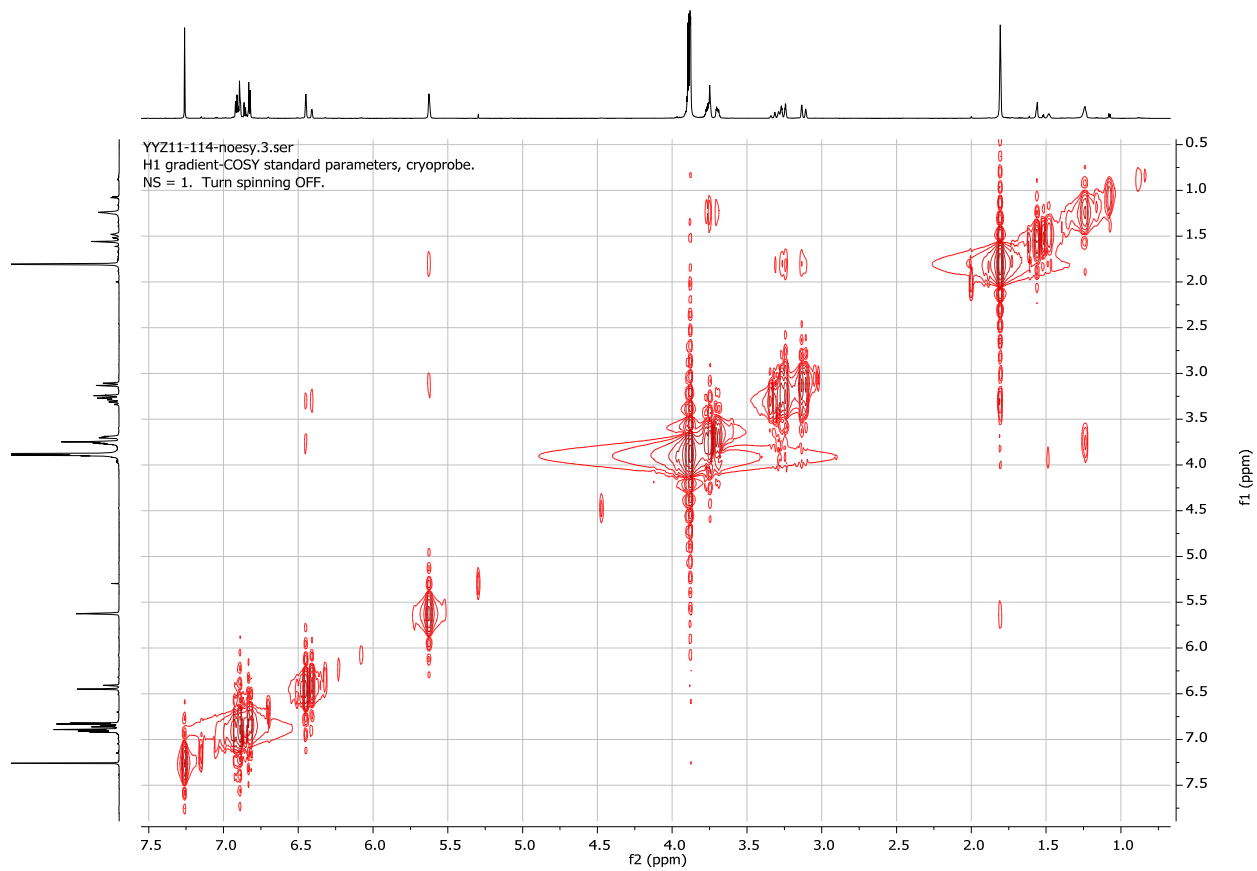

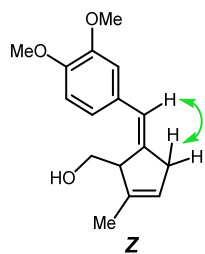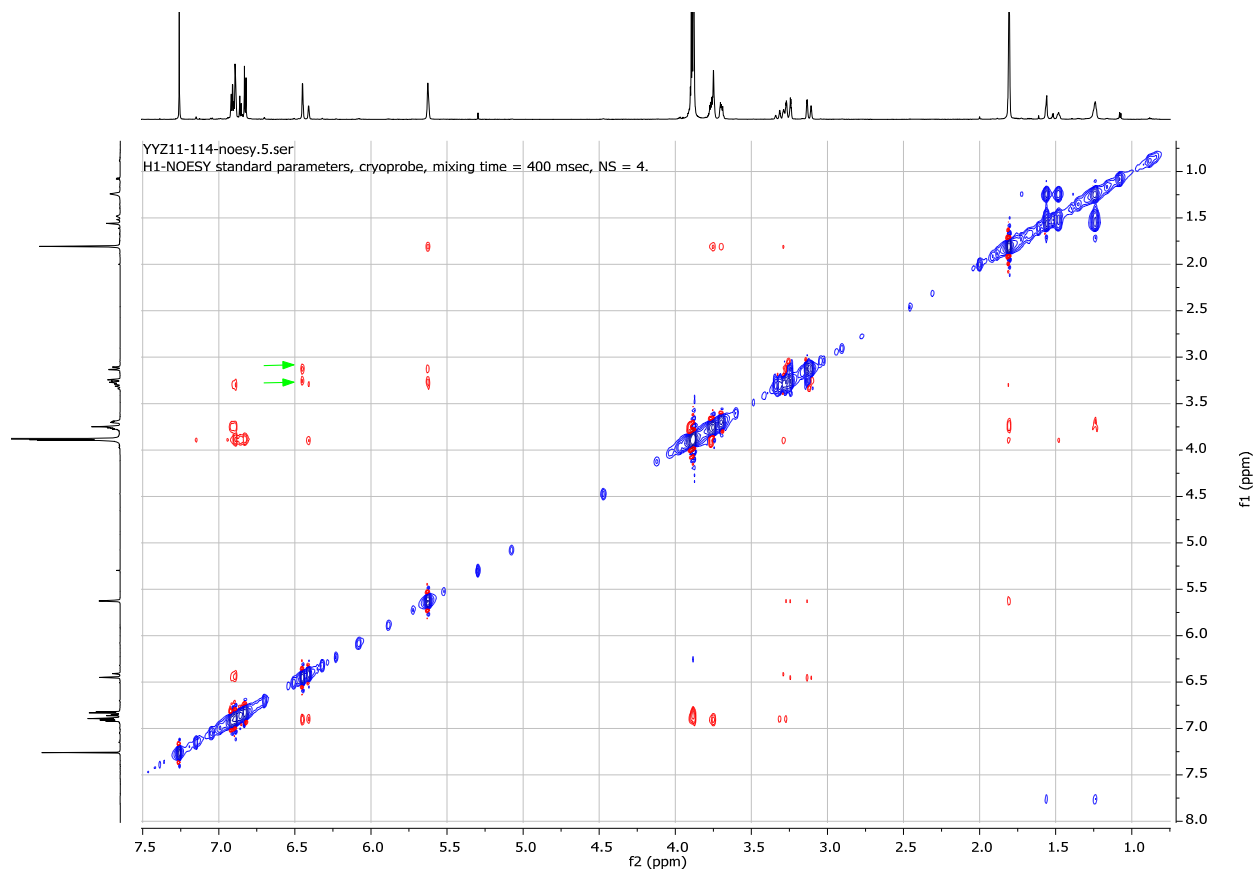



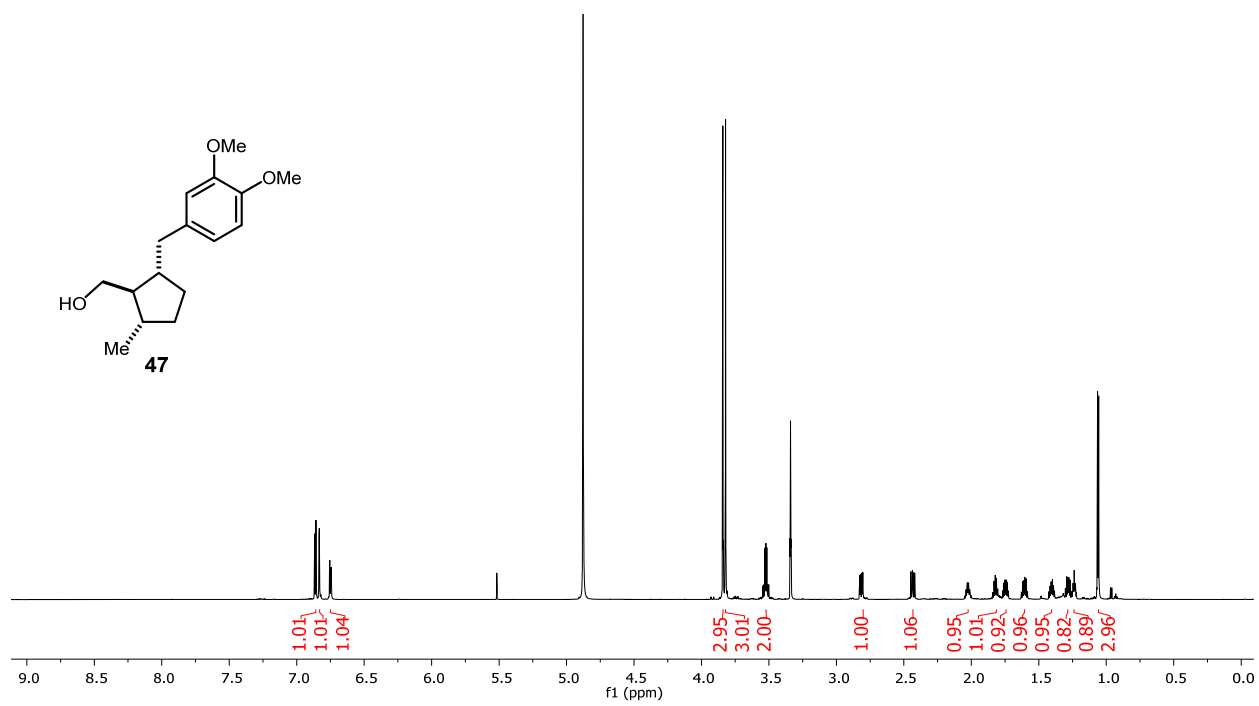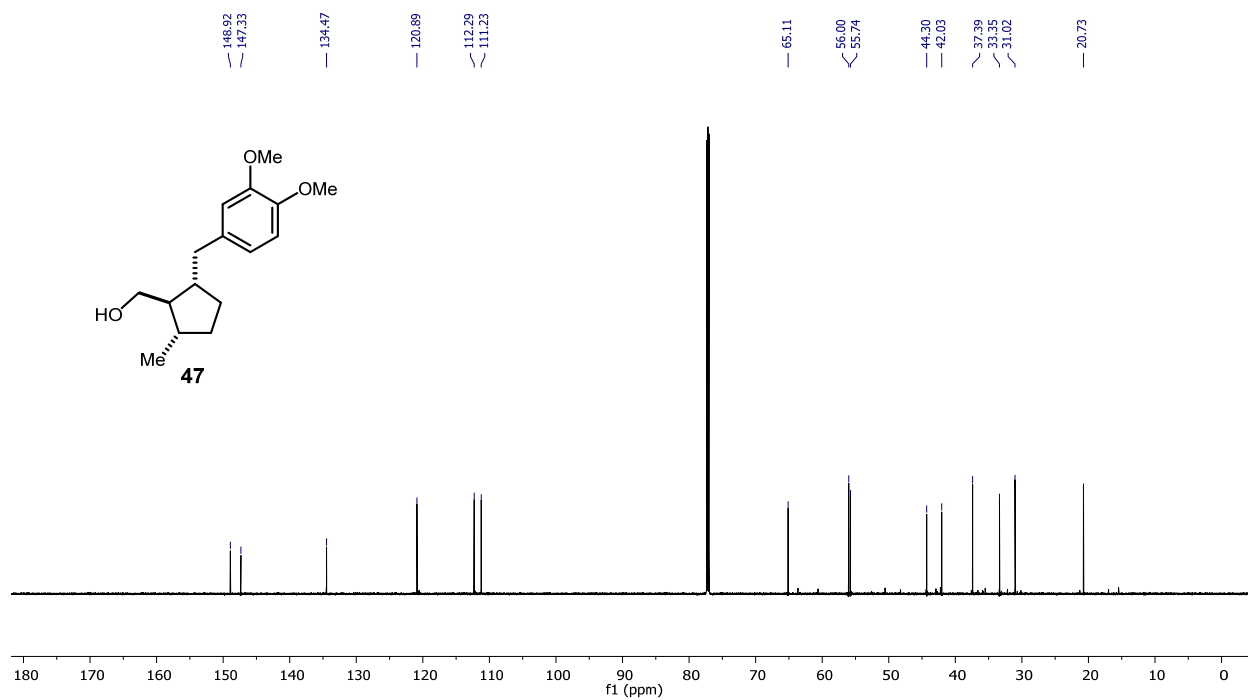

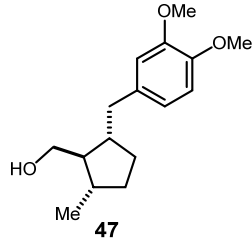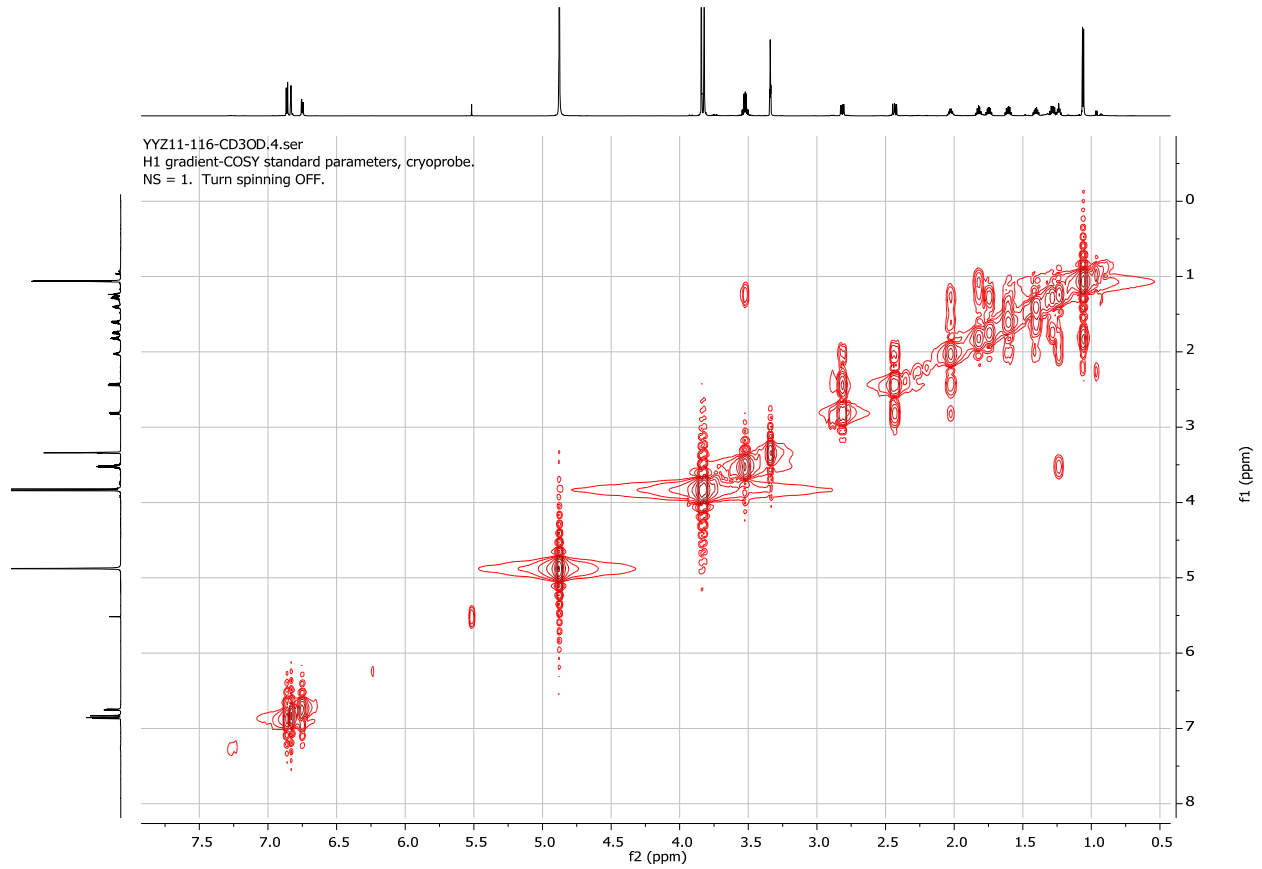

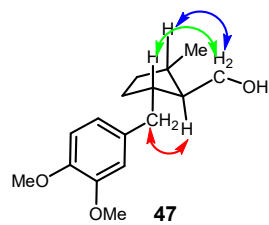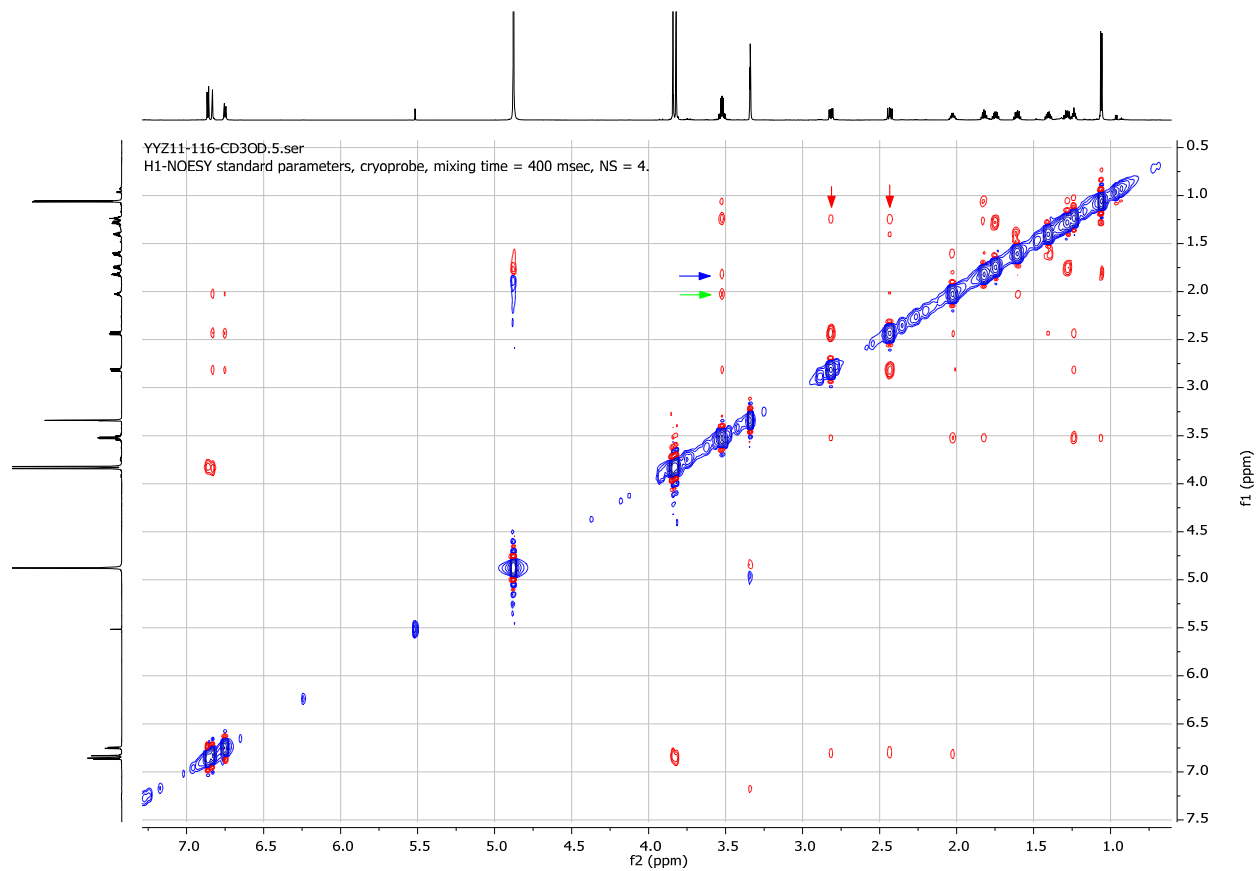

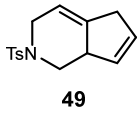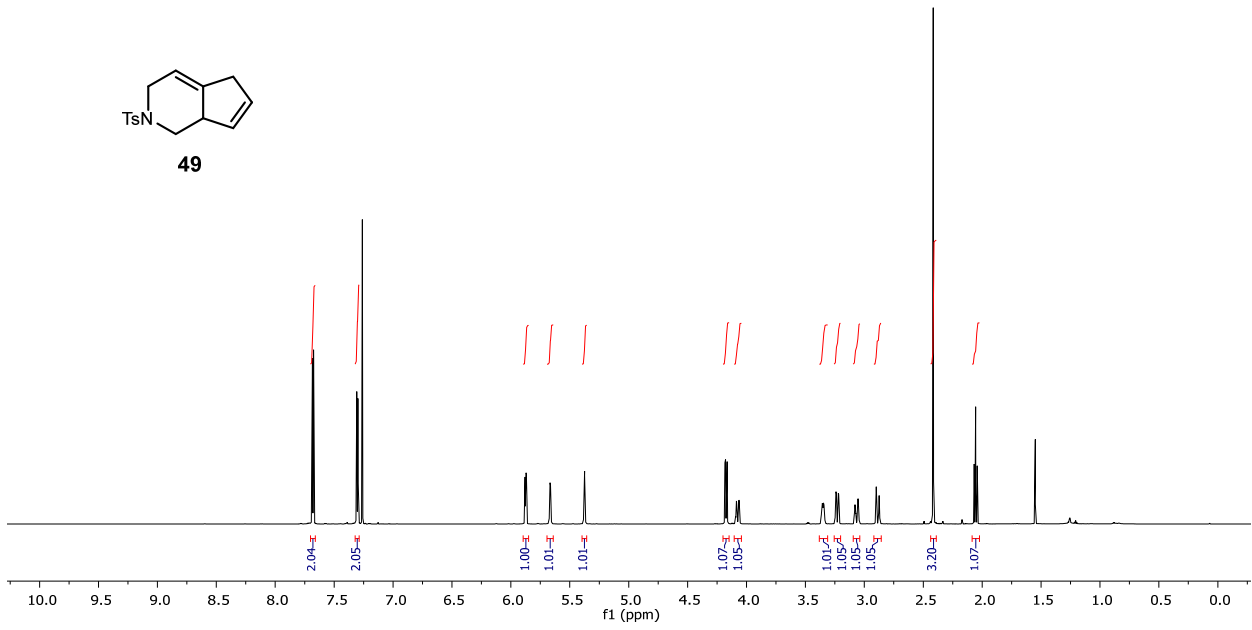

143.52  
 141.56  
 134.09  
 130.97  
 129.76  
 127.63  
 113.94  
 46.92  
 45.55  
 44.80  
 38.09  
 21.65

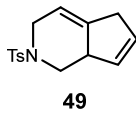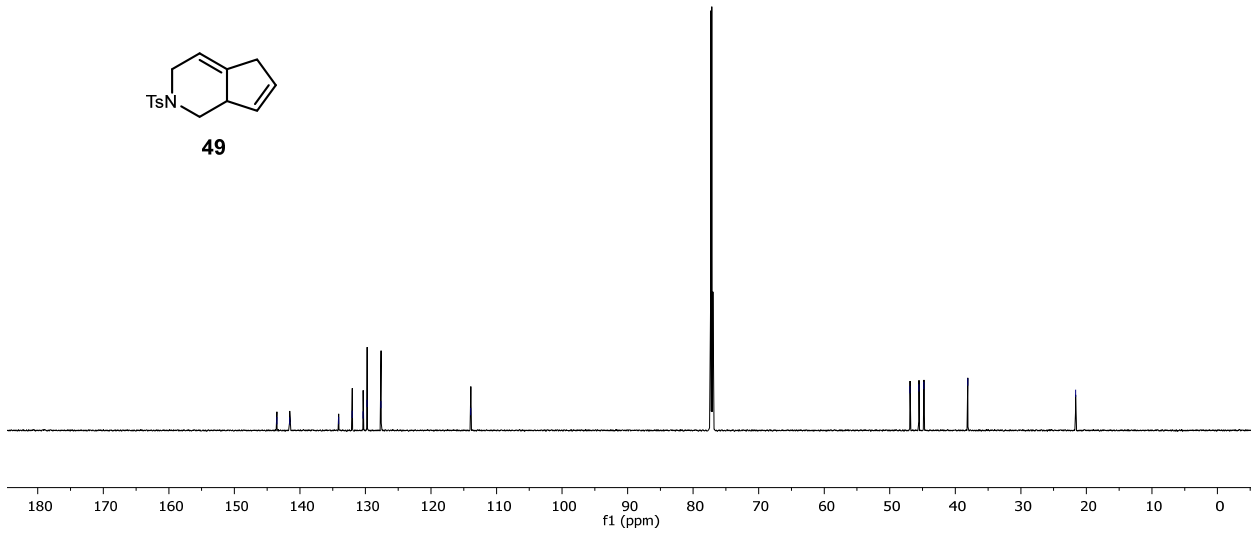

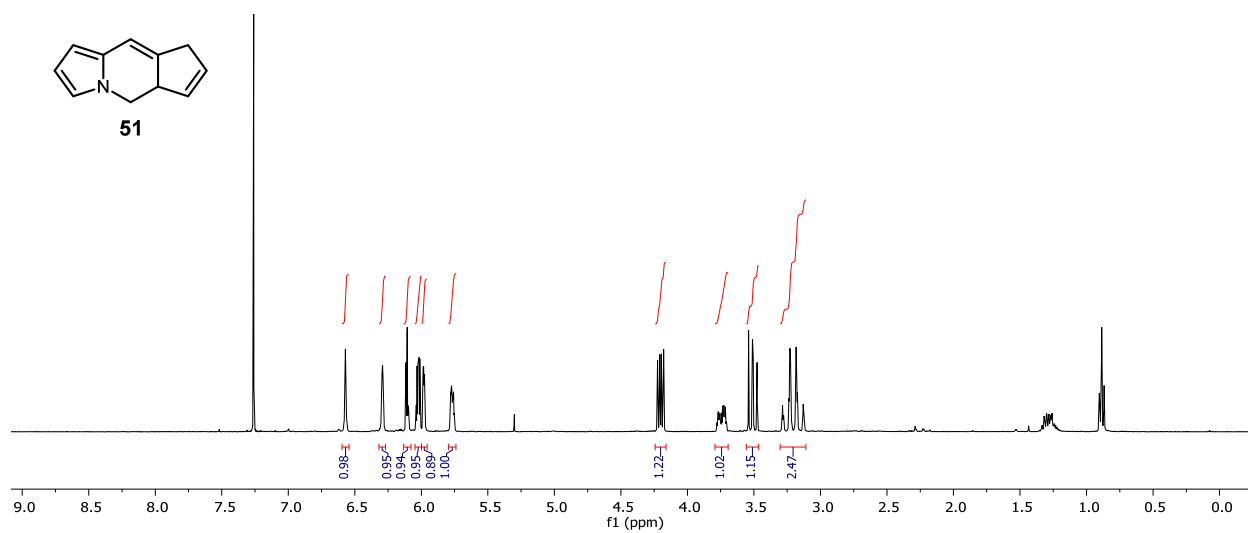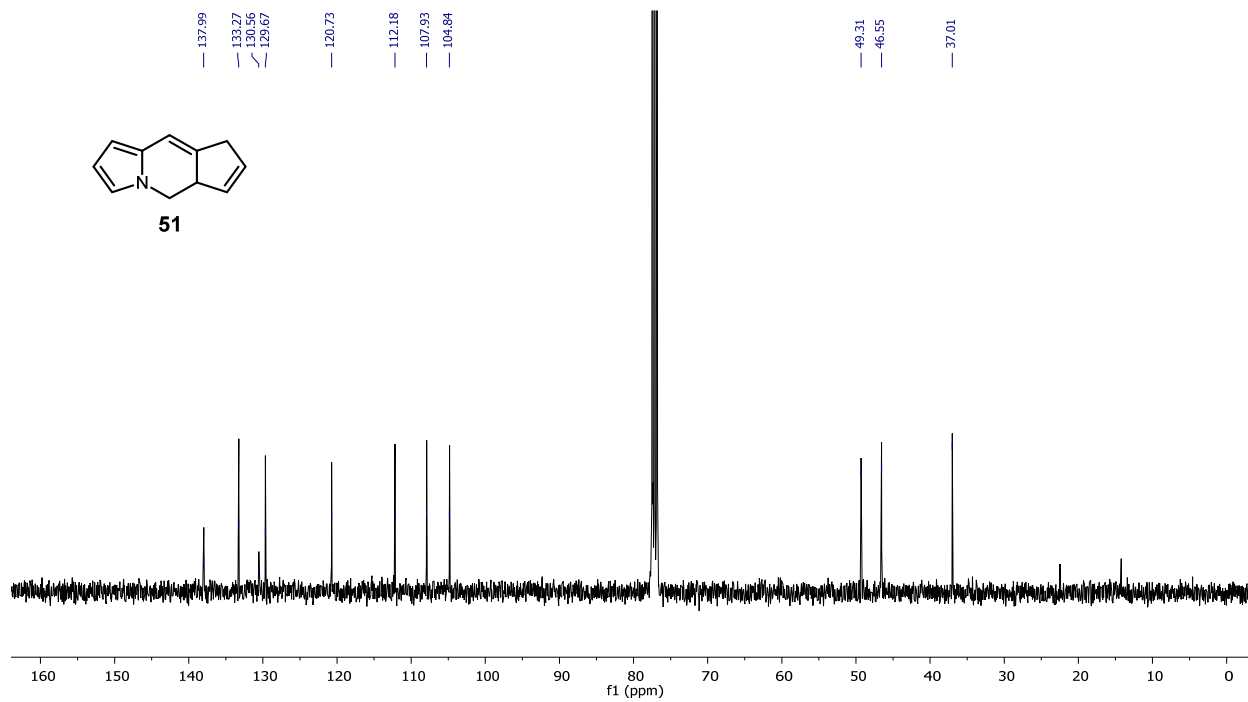

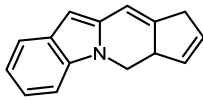

53

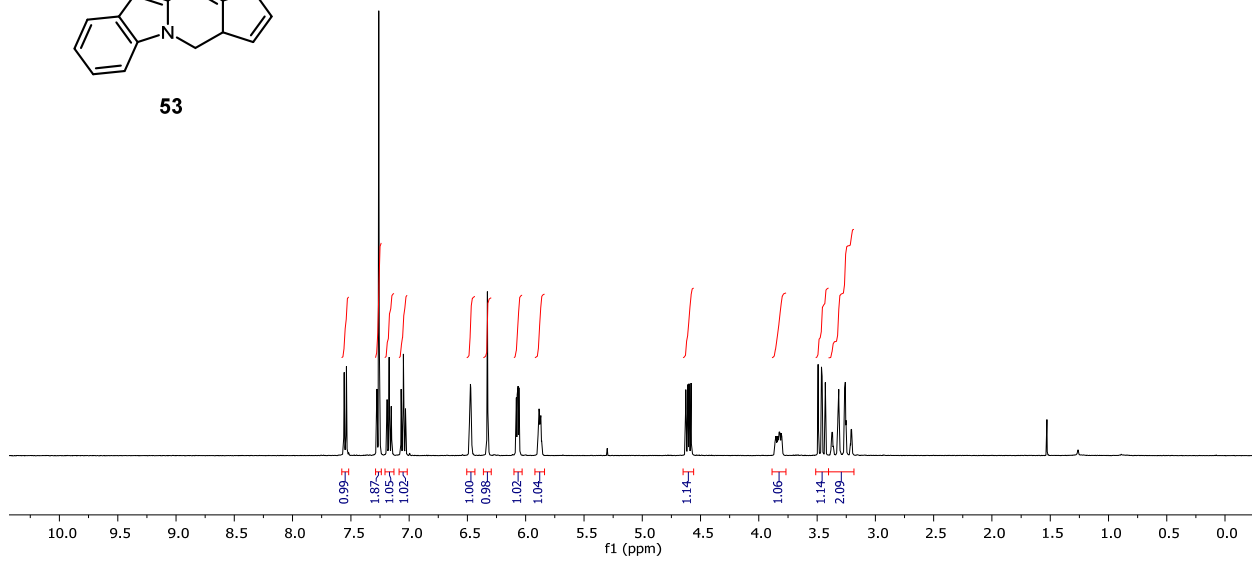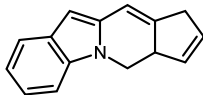

53

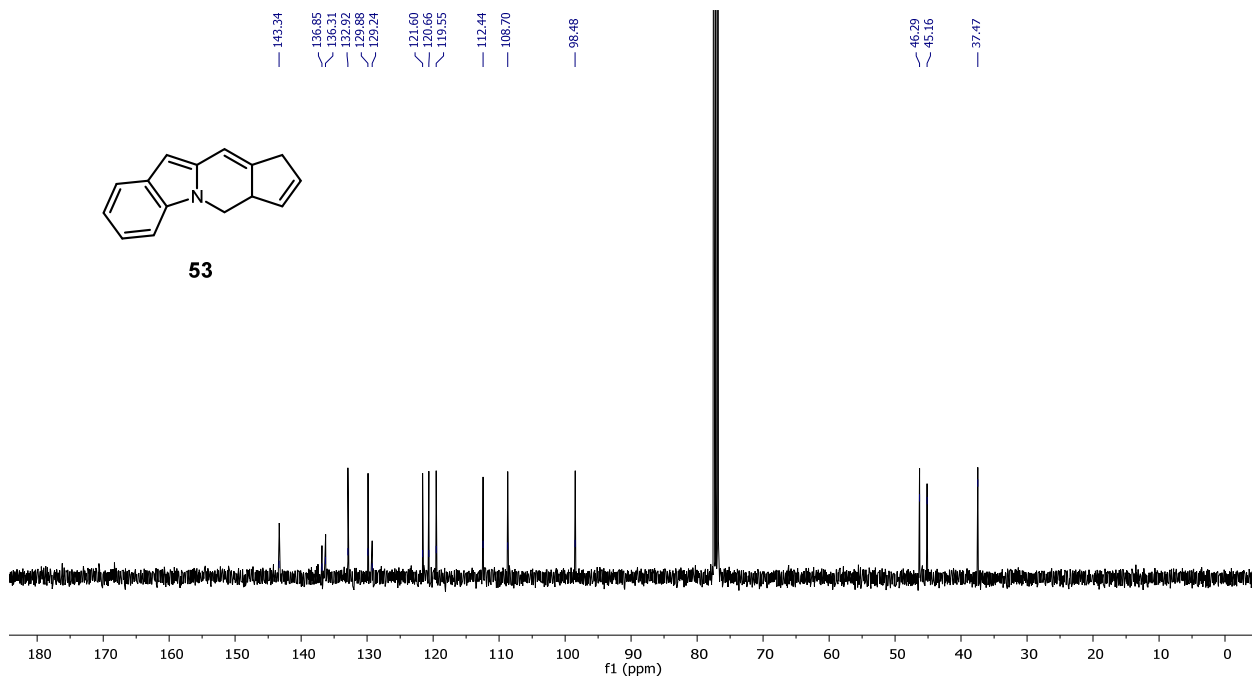

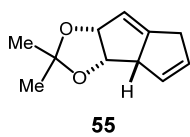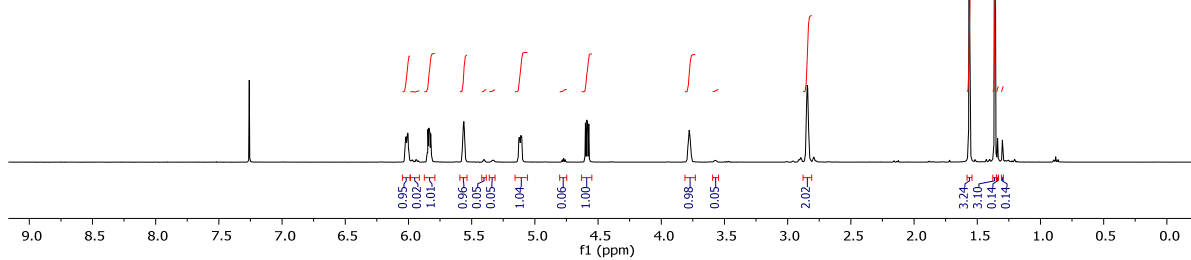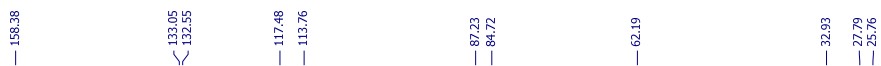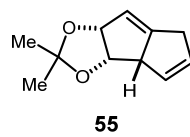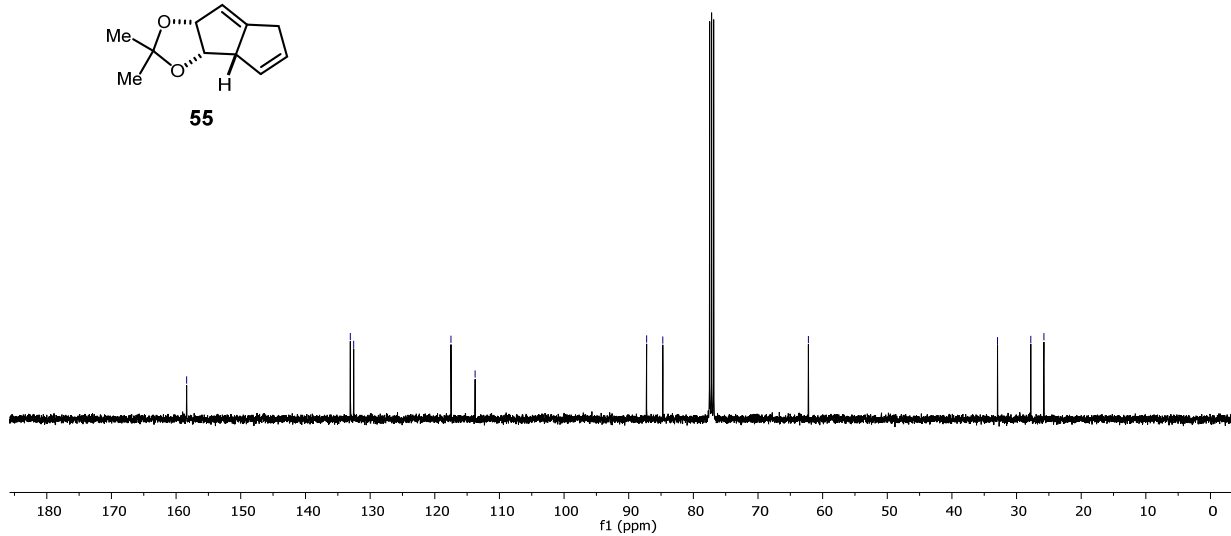

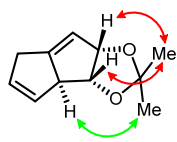

55

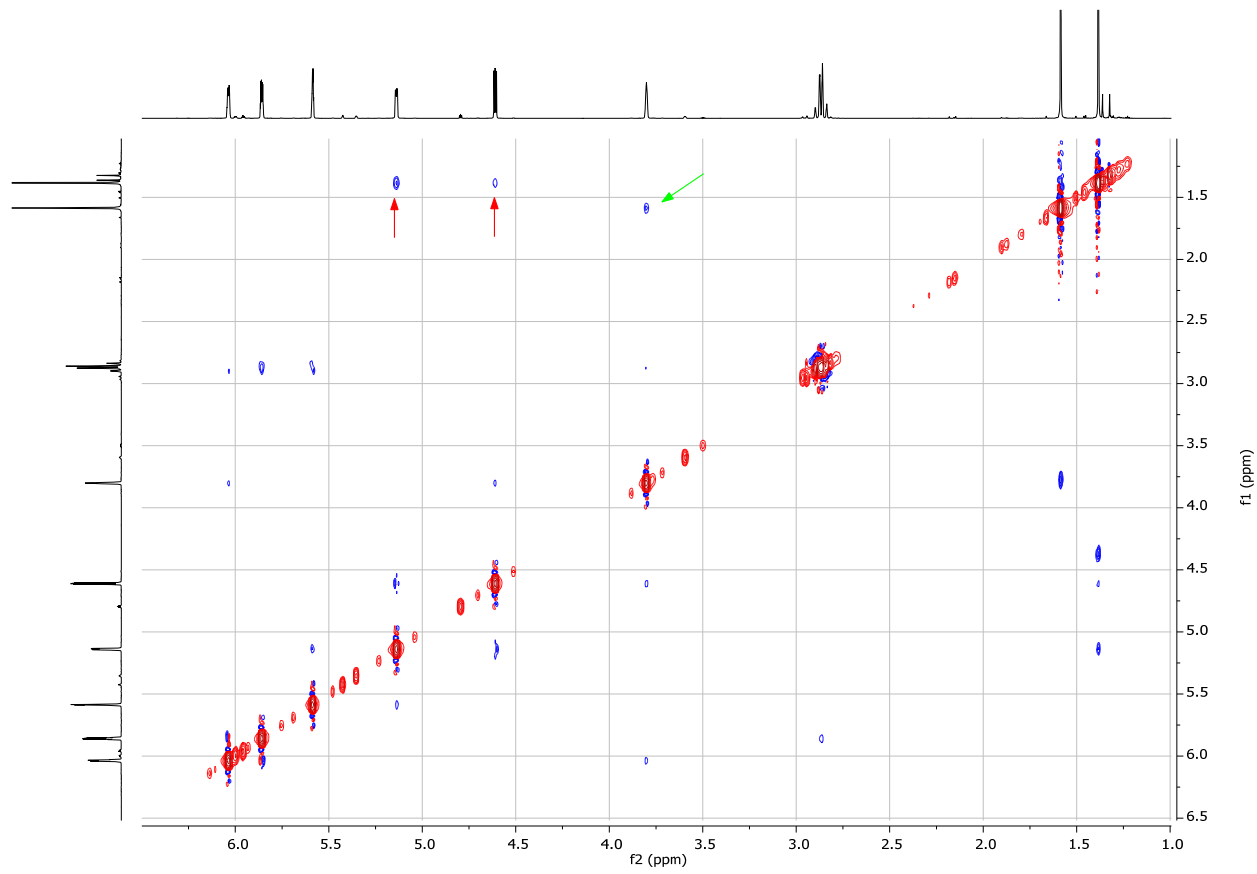



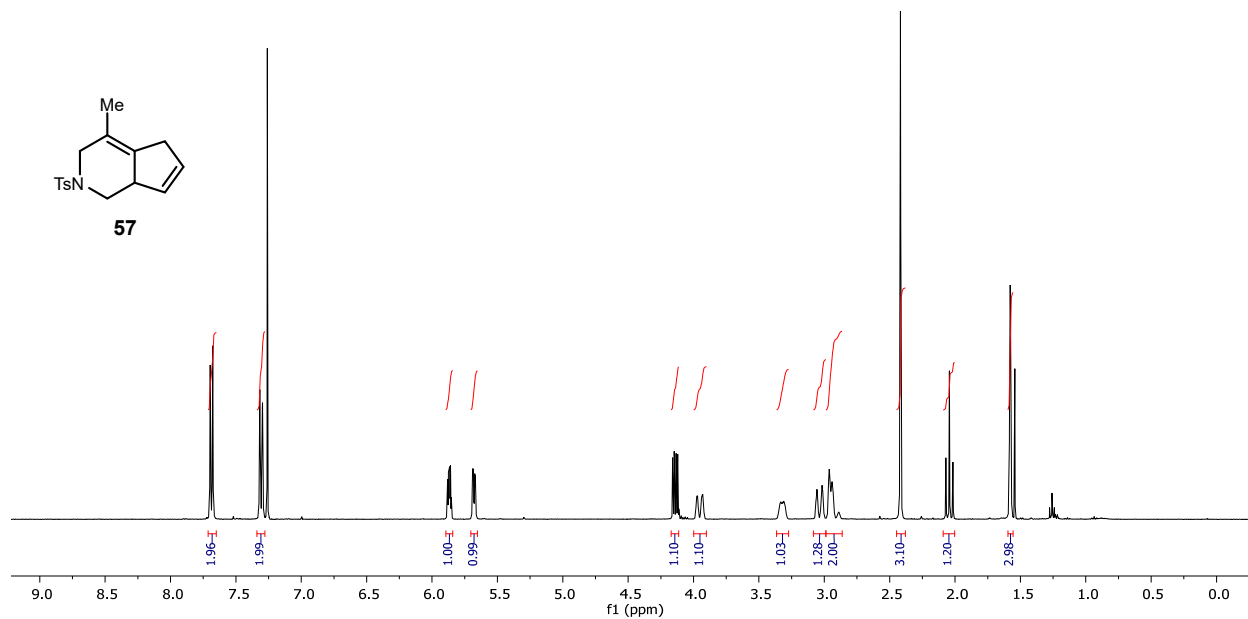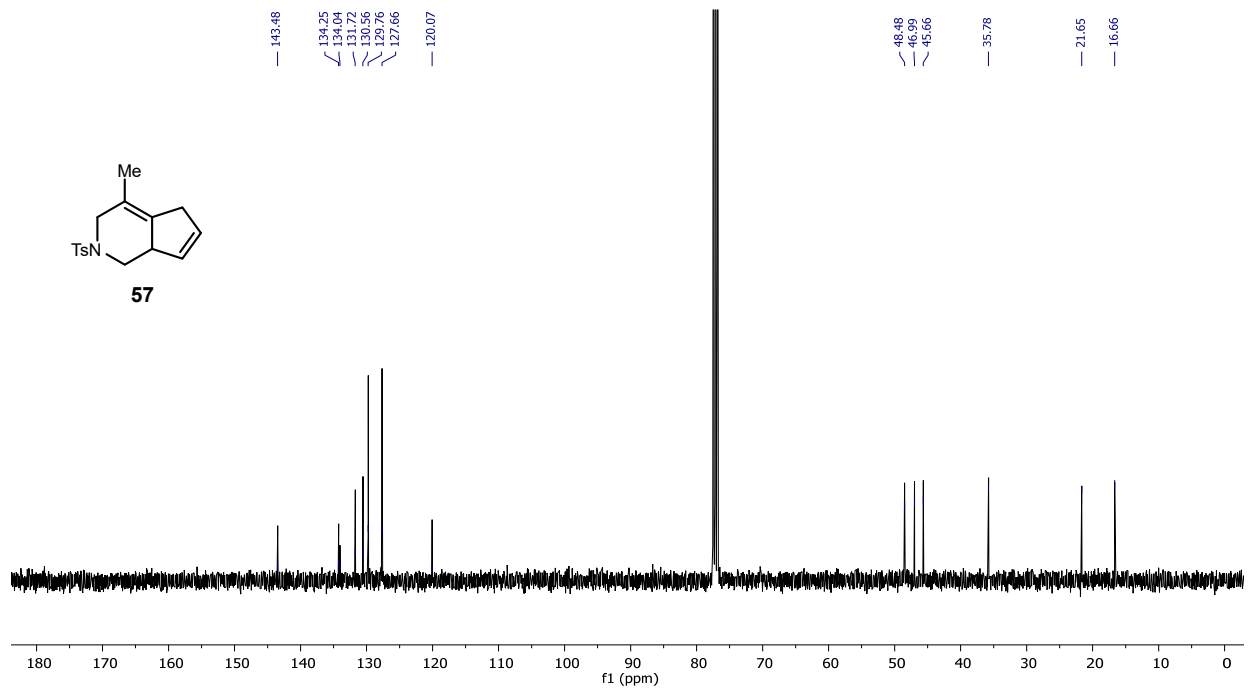

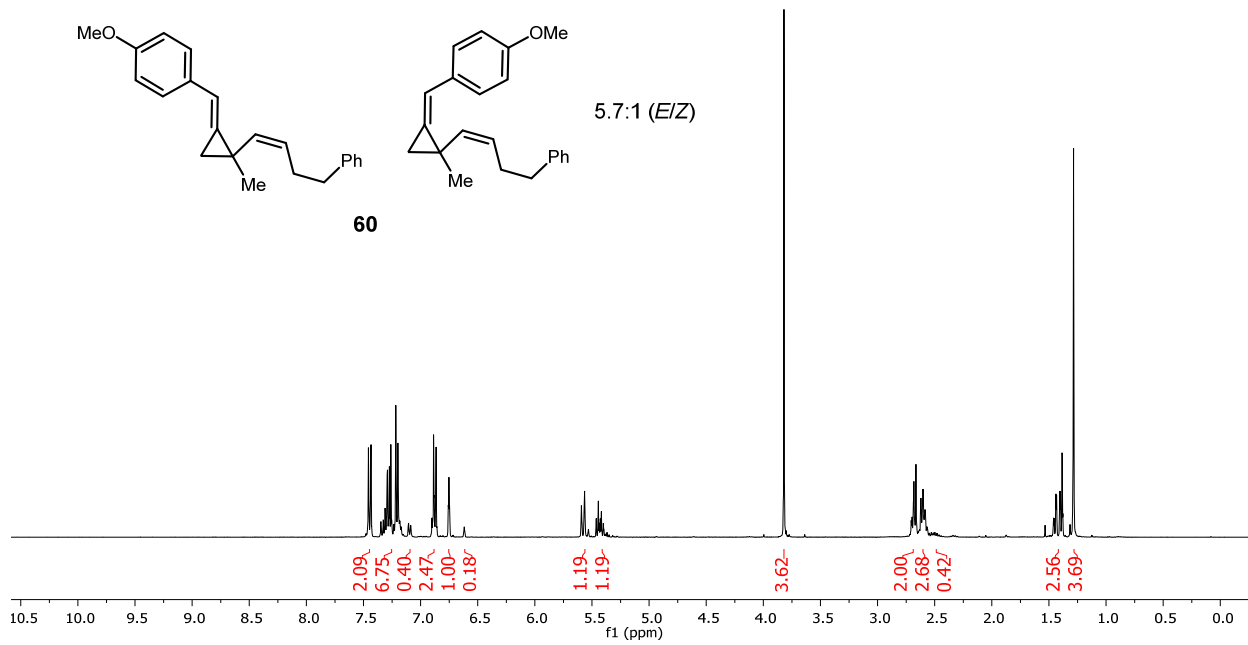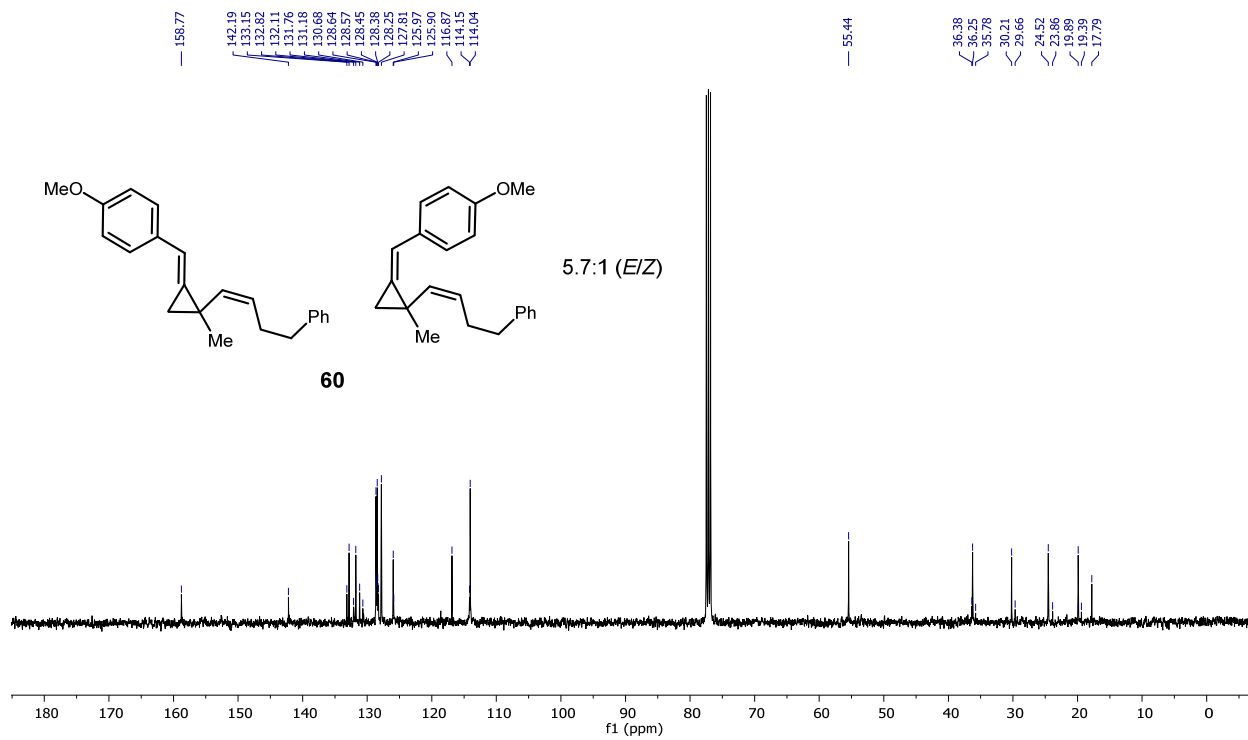

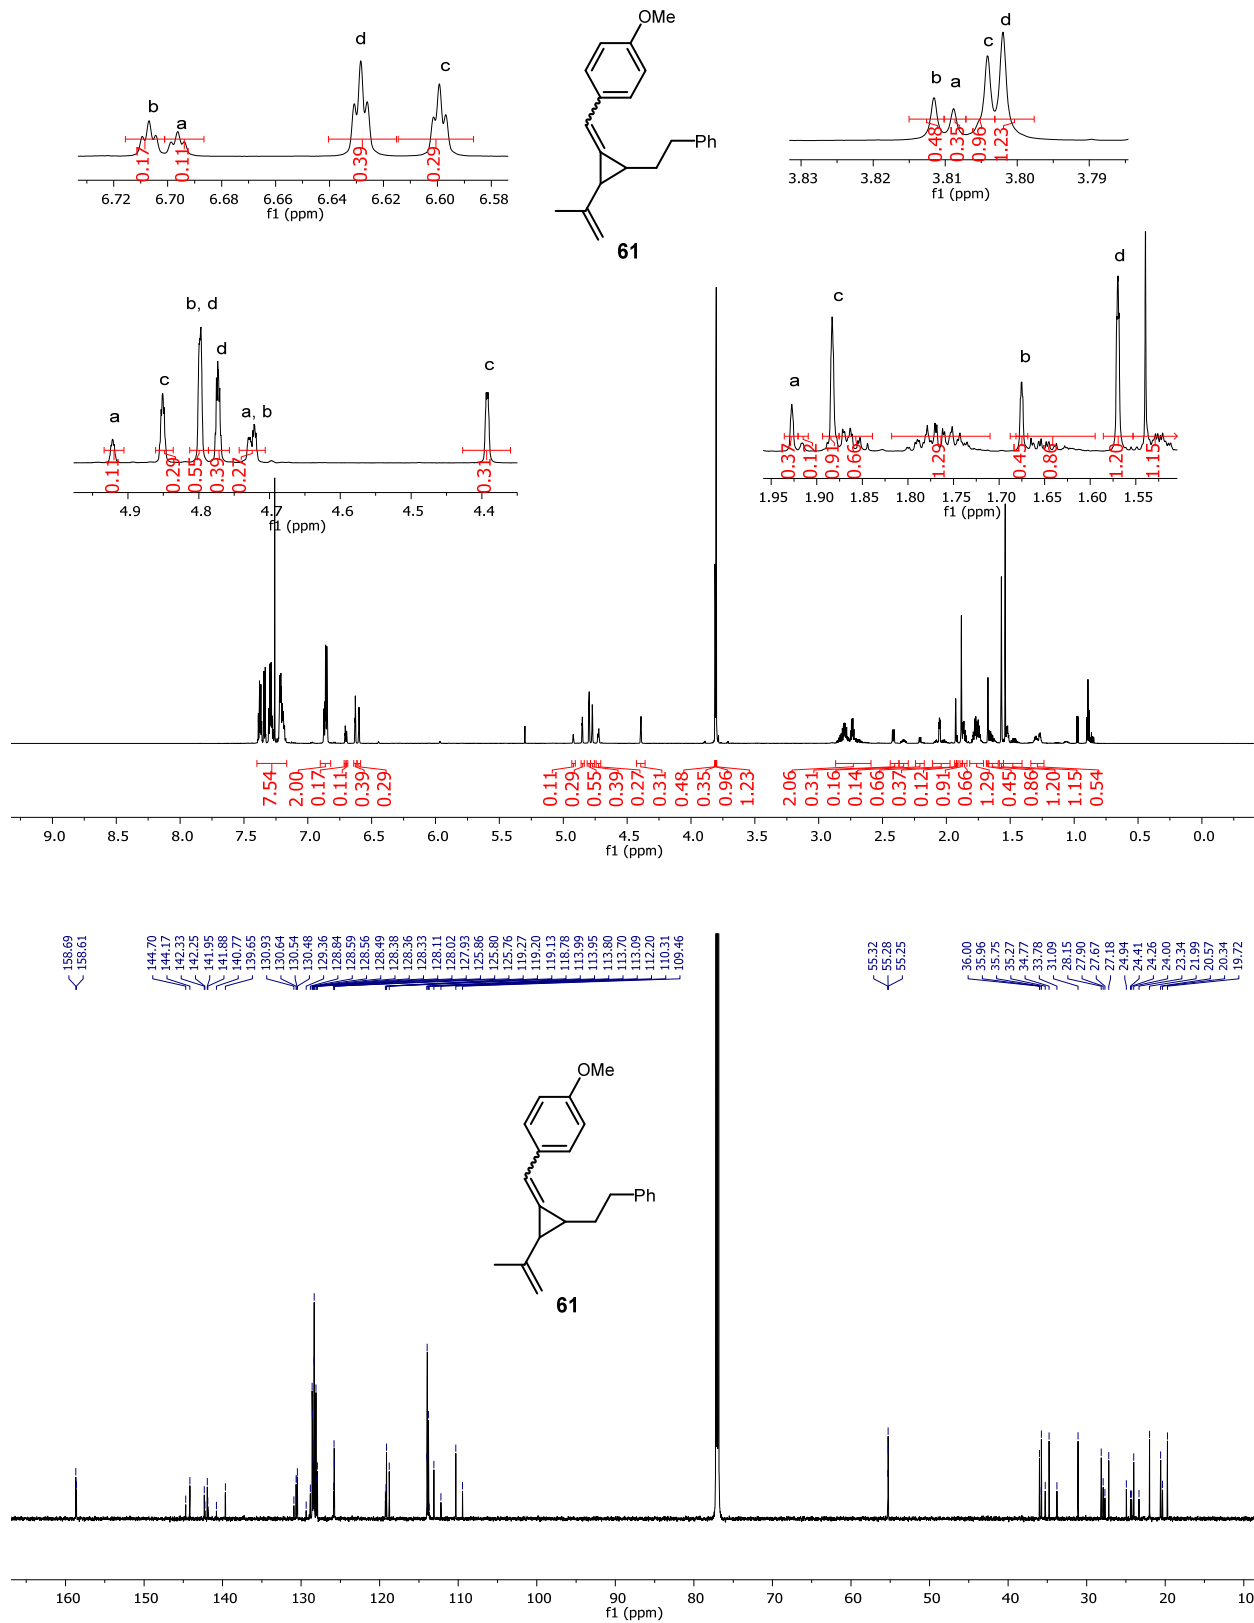

### 13. DFT Calculations

**Computational Methods.** Geometry optimizations were performed using the Gaussian 09 (46) software package. All geometries were fully optimized at the M06-L/6-31G(d,p) (47) level of DFT. Stationary points were verified by frequency analysis. The catalyst was modeled with 2,6-Me<sub>2</sub>Ph- substituents on the imines.

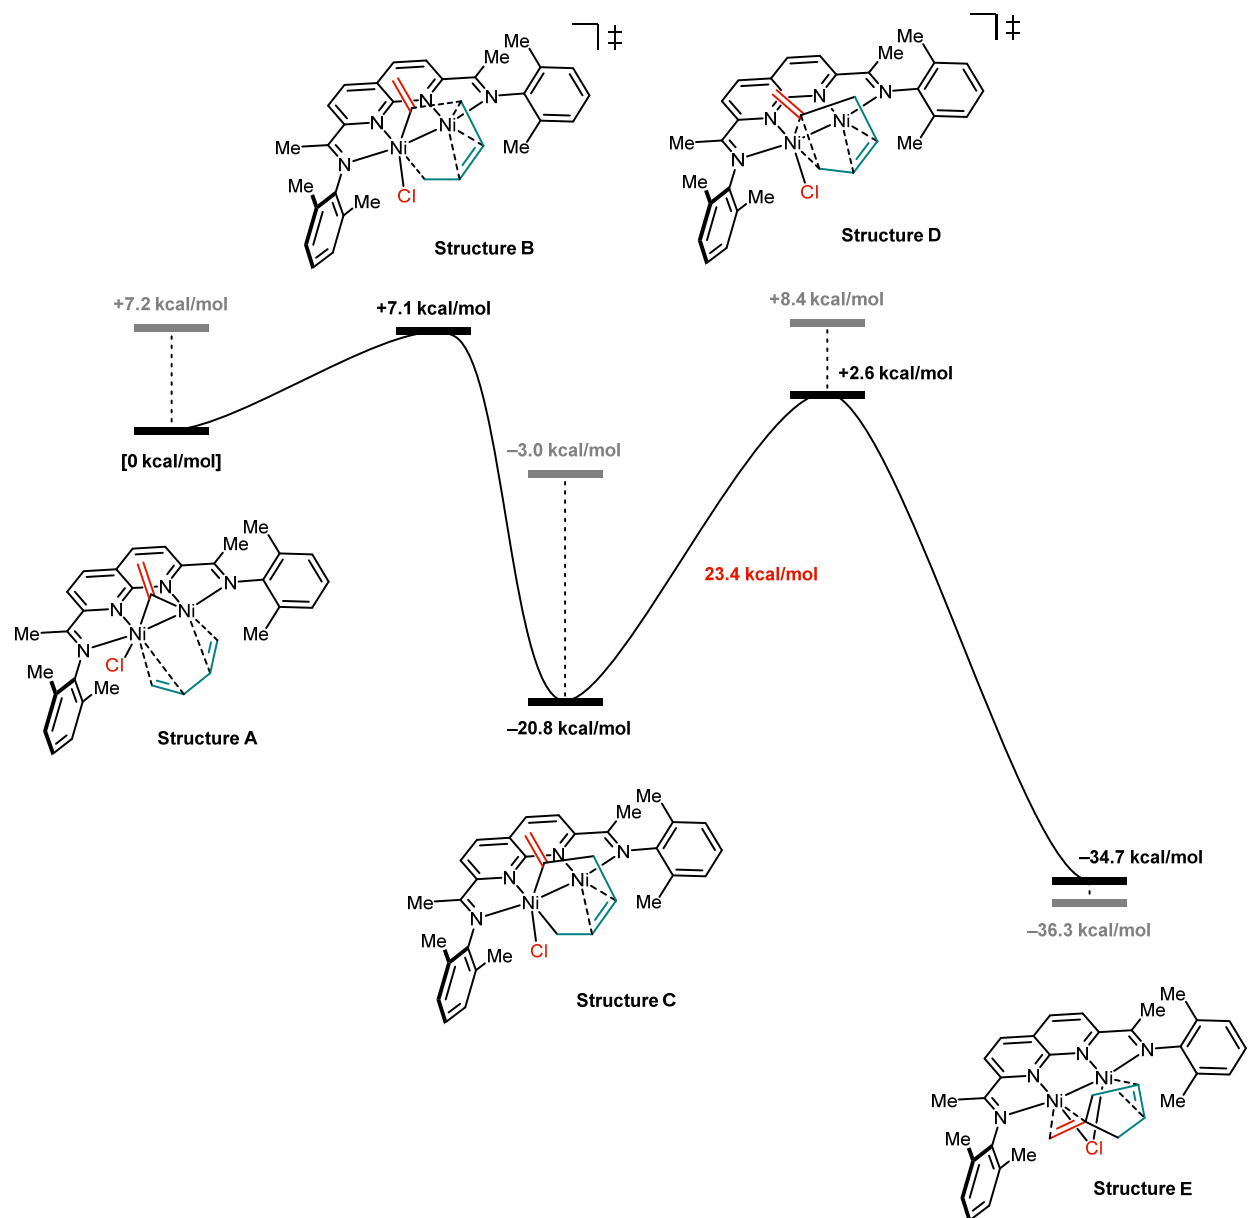

**Figure S12.** Calculated [4 + 1]-cycloaddition pathway. Uncorrected electronic energies are shown in kcal/mol and are relative to the energy of Structure A ( $S = 1/2$ ). Black = doublet surface; gray = quartet surface.

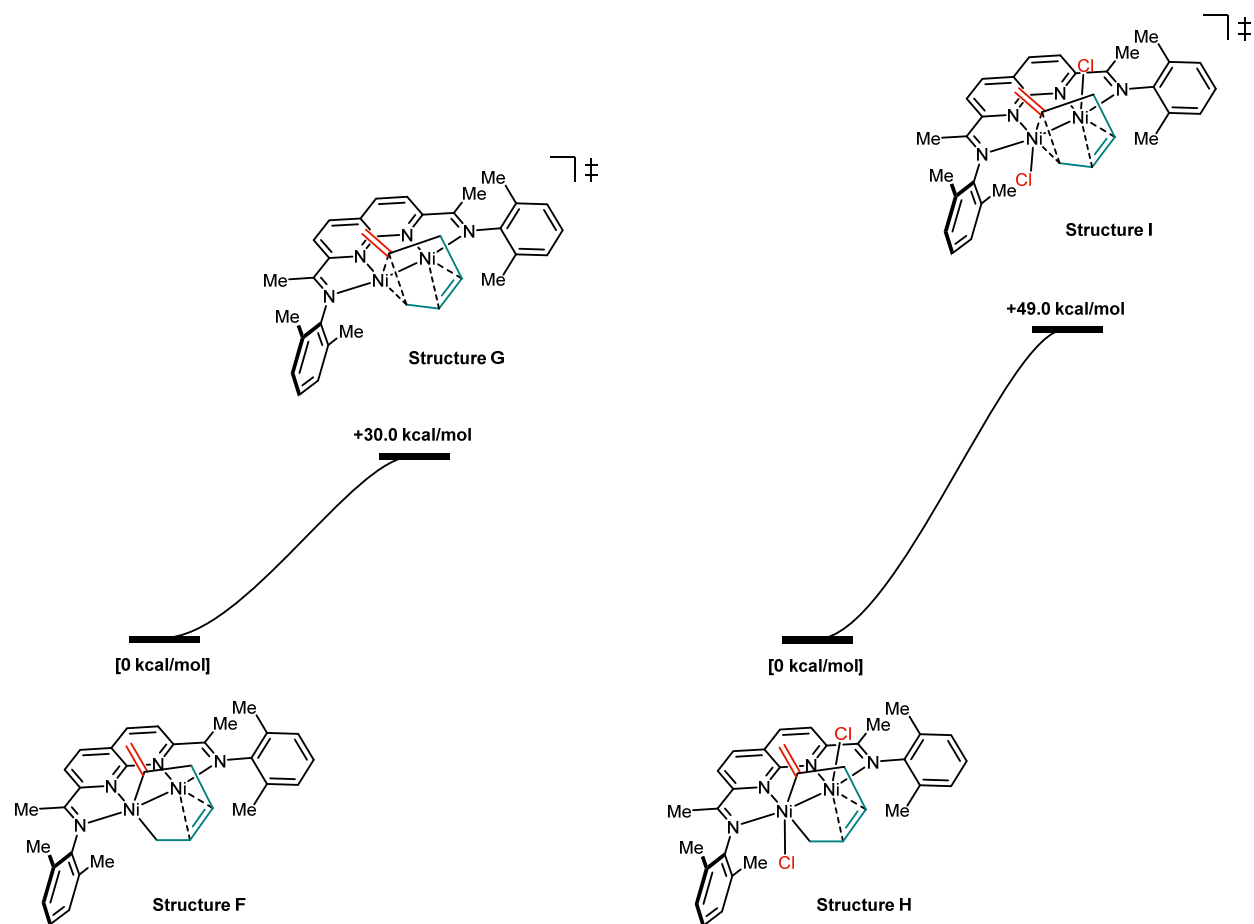

**Figure S13.** Dependence of the C–C reductive elimination barriers on the oxidation state of the [NDI]Ni<sub>2</sub> catalyst. The reductive elimination with one Cl bound to the catalyst is 23.4 kcal/mol (see Figure S12).

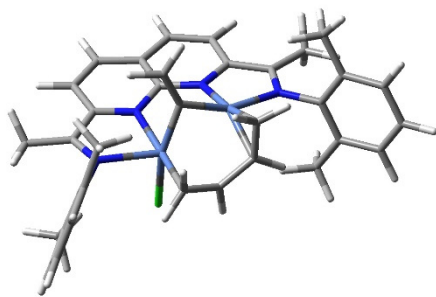

### Structure A

Charge = 0; Multiplicity = 2

Imaginary Frequencies = 0

Electronic Energy = -5012.66162325

Electronic Energy + ZPE = -5012.040577

Free Energy (298 K) = -5012.109562

|   |             |             |             |
|---|-------------|-------------|-------------|
| C | 2.37014300  | 3.66820100  | -0.30011500 |
| C | 1.21180200  | 4.42217800  | -0.20735300 |
| C | -0.04101200 | 3.79108400  | -0.11086200 |
| C | -0.05126200 | 2.36077000  | -0.13256100 |
| C | 2.28767800  | 2.27454700  | -0.24480100 |
| H | -1.30644300 | 5.54073500  | 0.08594100  |
| H | 3.33612200  | 4.15126200  | -0.40291000 |
| H | 1.25702100  | 5.50773900  | -0.21784200 |
| C | -1.28516200 | 4.45653600  | 0.03019000  |
| C | -2.39876500 | 2.31387600  | 0.05332800  |
| C | -2.43843200 | 3.71481600  | 0.13978200  |
| H | -3.39608000 | 4.20246600  | 0.29720000  |
| N | -1.20595700 | 1.64651400  | -0.15081000 |
| N | 1.08635000  | 1.66194000  | -0.11564200 |
| C | 3.42213100  | 1.37110900  | -0.29913800 |
| C | -3.51201300 | 1.44868700  | 0.17318400  |
| C | 4.80225400  | 1.93819700  | -0.38472700 |
| H | 4.87002100  | 2.65246100  | -1.21124400 |
| H | 5.06392100  | 2.47987900  | 0.53061300  |
| H | 5.54463300  | 1.15473900  | -0.54059200 |
| C | -4.88386900 | 1.97039700  | 0.45536100  |
| H | -5.19978700 | 2.68840400  | -0.30933300 |
| H | -5.61959300 | 1.16527000  | 0.48634600  |
| H | -4.91974800 | 2.49505600  | 1.41653500  |
| N | 3.14386800  | 0.09431600  | -0.28339100 |
| N | -3.22240300 | 0.15470100  | 0.01651400  |
| C | 4.16546600  | -0.87852400 | -0.14154900 |
| C | 4.93556000  | -0.95709600 | 1.03854000  |
| C | 4.33405400  | -1.82113400 | -1.17828900 |
| C | 5.83588100  | -2.02046800 | 1.16388700  |
| C | 5.25413200  | -2.85227100 | -1.00974100 |
| C | 5.99622000  | -2.96531100 | 0.16152200  |
| H | 6.41971700  | -2.09329600 | 2.07902700  |
| H | 5.38606100  | -3.57146400 | -1.81518400 |
| H | 6.70099600  | -3.78243200 | 0.28688900  |
| C | -4.24058200 | -0.81935800 | 0.17303500  |
| C | -4.43660800 | -1.40612100 | 1.43662300  |
| C | -4.99702000 | -1.21300600 | -0.94557900 |
| C | -5.39569100 | -2.41450800 | 1.55457200  |
| C | -5.94897800 | -2.22048400 | -0.78092900 |
| C | -6.14566800 | -2.82293300 | 0.45728100  |
| H | -5.55174200 | -2.87829800 | 2.52601700  |
| H | -6.53876600 | -2.53141200 | -1.64040900 |
| H | -6.88536700 | -3.61065400 | 0.56731700  |
| C | -4.79135000 | -0.53847700 | -2.26672800 |

|    |             |             |             |
|----|-------------|-------------|-------------|
| H  | -3.72890900 | -0.49681100 | -2.53488400 |
| H  | -5.33277200 | -1.05221000 | -3.06439300 |
| H  | -5.13849900 | 0.50196200  | -2.24725600 |
| C  | -3.66086800 | -0.92642000 | 2.62588200  |
| H  | -2.60584000 | -0.74284100 | 2.39095400  |
| H  | -4.05206800 | 0.02808700  | 2.99932600  |
| H  | -3.71434000 | -1.64216400 | 3.44954100  |
| C  | 3.57684800  | -1.67264000 | -2.45751400 |
| H  | 2.49736900  | -1.61122400 | -2.28876400 |
| H  | 3.85024900  | -0.74519500 | -2.97708000 |
| H  | 3.77677200  | -2.50529500 | -3.13622500 |
| C  | 4.85458700  | 0.04992500  | 2.14486900  |
| H  | 3.91343900  | 0.60193900  | 2.15359100  |
| H  | 4.93967800  | -0.44350900 | 3.11649500  |
| H  | 5.68562500  | 0.76489600  | 2.08025300  |
| Ni | -1.37830700 | -0.21254000 | -0.49920400 |
| Ni | 1.10468100  | -0.29516600 | 0.11172000  |
| C  | 0.19363100  | -0.22875200 | -1.50696700 |
| C  | -1.31882700 | -2.11406800 | 0.11667800  |
| H  | -2.14062100 | -2.23807800 | 0.81977800  |
| C  | -1.63173300 | -2.06060600 | -1.25663900 |
| H  | -2.66641100 | -2.24326200 | -1.53936600 |
| H  | -0.89099900 | -2.31317400 | -2.00768800 |
| C  | -0.00695000 | -2.11074600 | 0.71542900  |
| H  | 0.00167900  | -2.04359900 | 1.80006600  |
| C  | 1.22339900  | -2.30325500 | 0.08007600  |
| H  | 2.08498000  | -2.55870000 | 0.69371800  |
| H  | 1.24408600  | -2.66077300 | -0.94769800 |
| Cl | 1.42177900  | 0.02183000  | 2.42373900  |
| C  | 0.50752500  | -0.00526500 | -2.77382700 |
| H  | 1.53040900  | 0.18087600  | -3.10371200 |
| H  | -0.25566200 | 0.01767800  | -3.55329000 |

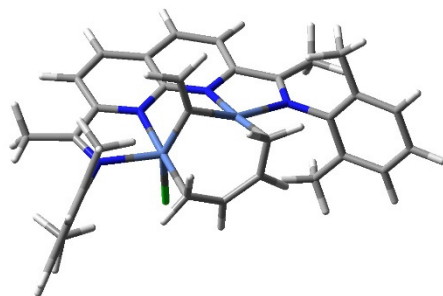

### Structure A

Charge = 0; Multiplicity = 4

Imaginary Frequencies = 0

Electronic Energy = -5012.65018958

Electronic Energy + ZPE = -5012.031475

Free Energy (298 K) = -5012.104044

|   |             |             |             |
|---|-------------|-------------|-------------|
| C | 2.42550900  | 3.69276500  | -0.24507200 |
| C | 1.26712500  | 4.44473500  | -0.16845800 |
| C | 0.01309700  | 3.80589800  | -0.08267900 |
| C | -0.00167700 | 2.37496900  | -0.10138700 |
| C | 2.34345200  | 2.29623400  | -0.20111000 |
| H | -1.25996800 | 5.55227600  | 0.05509200  |
| H | 3.39550400  | 4.17545500  | -0.31114100 |
| H | 1.30940400  | 5.53039500  | -0.16694100 |
| C | -1.23062800 | 4.46660000  | 0.03398000  |
| C | -2.33277000 | 2.32275300  | 0.07690800  |
| C | -2.38799400 | 3.72169100  | 0.13755400  |
| H | -3.34937900 | 4.21313800  | 0.25095700  |
| N | -1.14731500 | 1.65639400  | -0.07752800 |
| N | 1.14256400  | 1.67509000  | -0.11888800 |
| C | 3.47356800  | 1.39134900  | -0.19681000 |
| C | -3.48558500 | 1.46570900  | 0.17193900  |
| C | 4.86218900  | 1.93597800  | -0.28020300 |
| H | 4.97533700  | 2.56878500  | -1.16686800 |
| H | 5.09370300  | 2.56077900  | 0.58897300  |
| H | 5.59951000  | 1.13379400  | -0.33175300 |
| C | -4.83199200 | 2.03643400  | 0.48177100  |
| H | -5.13786700 | 2.75692700  | -0.28457000 |
| H | -5.59094100 | 1.25471200  | 0.53535900  |
| H | -4.82410600 | 2.57384000  | 1.43576900  |
| N | 3.17642700  | 0.11649400  | -0.14462800 |
| N | -3.25370100 | 0.18377200  | -0.01697400 |
| C | 4.19272100  | -0.86843200 | -0.03500500 |
| C | 4.86849900  | -1.05204100 | 1.18735400  |
| C | 4.44678100  | -1.69539000 | -1.14499500 |
| C | 5.78954800  | -2.09913100 | 1.27283800  |
| C | 5.38328500  | -2.71987800 | -1.01284400 |
| C | 6.04738000  | -2.93062300 | 0.19015100  |
| H | 6.30839100  | -2.25481900 | 2.21620100  |
| H | 5.58675200  | -3.35619000 | -1.87136900 |
| H | 6.76669500  | -3.73937200 | 0.28274100  |
| C | -4.28245700 | -0.77158400 | 0.16688800  |
| C | -4.46258100 | -1.32988000 | 1.44525200  |
| C | -5.03599800 | -1.19897100 | -0.93917800 |
| C | -5.41980900 | -2.33579000 | 1.59240800  |
| C | -5.98450300 | -2.20429200 | -0.74513400 |
| C | -6.17605400 | -2.77251600 | 0.50990900  |
| H | -5.56609700 | -2.77881100 | 2.57498900  |
| H | -6.57391700 | -2.54174700 | -1.59486700 |



|    |             |             |             |
|----|-------------|-------------|-------------|
| H  | -6.91333600 | -3.55864200 | 0.64395900  |
| C  | -4.81856800 | -0.56724400 | -2.27919400 |
| H  | -3.75460400 | -0.55982800 | -2.54912700 |
| H  | -5.36811900 | -1.09356300 | -3.06290800 |
| H  | -5.14167500 | 0.48097400  | -2.29370400 |
| C  | -3.65747900 | -0.83314000 | 2.60751300  |
| H  | -2.59820100 | -0.70243300 | 2.35441600  |
| H  | -4.00638400 | 0.14925800  | 2.95001200  |
| H  | -3.72798700 | -1.51484000 | 3.45818500  |
| C  | 3.74201900  | -1.45002600 | -2.44003800 |
| H  | 2.65422000  | -1.48763900 | -2.31808300 |
| H  | 3.96522300  | -0.45172900 | -2.83802900 |
| H  | 4.03124800  | -2.18440000 | -3.19560000 |
| C  | 4.62214800  | -0.15806400 | 2.36167000  |
| H  | 3.55202200  | -0.00693900 | 2.54481000  |
| H  | 5.07215400  | -0.57730600 | 3.26470300  |
| H  | 5.06791800  | 0.83421100  | 2.21501200  |
| Ni | -1.36143300 | -0.25467400 | -0.60368900 |
| Ni | 1.16360400  | -0.26280000 | -0.00098500 |
| C  | 0.23837000  | -0.27512200 | -1.61626900 |
| C  | -1.29346500 | -2.25046100 | 0.14879500  |
| H  | -2.08848900 | -2.33659600 | 0.88742200  |
| C  | -1.66331700 | -2.10658500 | -1.21125000 |
| H  | -2.71176600 | -2.27266600 | -1.45982100 |
| H  | -0.96136000 | -2.40168900 | -1.98822500 |
| C  | 0.03049900  | -2.36869100 | 0.64543400  |
| H  | 0.12821600  | -2.37132000 | 1.72750400  |
| C  | 1.21605000  | -2.35006000 | -0.09801200 |
| H  | 2.13501000  | -2.61822500 | 0.42253600  |
| H  | 1.18353600  | -2.61664400 | -1.15273000 |
| Cl | 1.04479500  | -0.01841200 | 2.39280300  |
| C  | 0.44330800  | -0.10562000 | -2.91469900 |
| H  | 1.43071600  | 0.09906500  | -3.33247800 |
| H  | -0.37352800 | -0.14762900 | -3.63923000 |

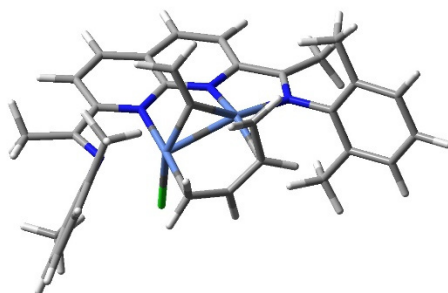

**Structure B**

Charge = 0; Multiplicity = 2

Imaginary Frequencies = 1  
Electronic Energy = -5012.65029076  
Electronic Energy + ZPE = -5012.030786  
Free Energy (298 K) = -5012.100469

|   |             |             |             |
|---|-------------|-------------|-------------|
| C | 2.36741600  | 3.68131700  | -0.32348400 |
| C | 1.21338300  | 4.44420400  | -0.23281400 |
| C | -0.04430100 | 3.82103600  | -0.11441700 |
| C | -0.05697100 | 2.39382400  | -0.10829100 |
| C | 2.28090900  | 2.28716200  | -0.25893300 |
| H | -1.32405700 | 5.56397600  | 0.04021800  |
| H | 3.33597200  | 4.15901100  | -0.43071200 |
| H | 1.26684200  | 5.52904000  | -0.25883000 |
| C | -1.29339800 | 4.47875400  | 0.01328100  |
| C | -2.40691500 | 2.33358200  | 0.07847500  |
| C | -2.44936700 | 3.73724900  | 0.12781300  |
| H | -3.40497100 | 4.23707000  | 0.25106700  |
| N | -1.20363200 | 1.67987800  | -0.07632200 |
| N | 1.07386600  | 1.68354500  | -0.12123500 |
| C | 3.39637200  | 1.36596000  | -0.30346400 |
| C | -3.49872500 | 1.43411300  | 0.17634200  |
| C | 4.78809200  | 1.89819400  | -0.40540200 |
| H | 4.86503900  | 2.60906200  | -1.23428300 |
| H | 5.07196300  | 2.43707200  | 0.50504900  |
| H | 5.51070800  | 1.09709200  | -0.56596500 |
| C | -4.90463300 | 1.85923500  | 0.43269400  |
| H | -5.30160600 | 1.36722000  | 1.32771800  |
| H | -4.98784600 | 2.93693200  | 0.57610900  |
| H | -5.56950200 | 1.57435200  | -0.39042400 |
| N | 3.08731500  | 0.09126500  | -0.26996400 |
| N | -3.16241200 | 0.14794800  | 0.03904300  |
| C | 4.08785400  | -0.90748100 | -0.14897900 |
| C | 4.85527500  | -1.02259300 | 1.02897100  |
| C | 4.23451000  | -1.83213200 | -1.20408800 |
| C | 5.73873000  | -2.10202000 | 1.13201300  |
| C | 5.14016200  | -2.88014200 | -1.05777000 |
| C | 5.88300500  | -3.02755200 | 0.10879900  |
| H | 6.32071000  | -2.20463000 | 2.04550400  |
| H | 5.25862300  | -3.58644200 | -1.87671100 |
| H | 6.57470400  | -3.85837300 | 0.21595700  |
| C | -4.17423800 | -0.83968300 | 0.14746600  |
| C | -4.38136300 | -1.45857900 | 1.39465100  |
| C | -4.89210000 | -1.22910100 | -0.99586600 |
| C | -5.33404900 | -2.47427100 | 1.47864900  |
| C | -5.83599300 | -2.25100100 | -0.86624400 |
| C | -6.05838700 | -2.86999800 | 0.35828100  |

|    |             |             |             |
|----|-------------|-------------|-------------|
| H  | -5.50097600 | -2.95988000 | 2.43755000  |
| H  | -6.39748100 | -2.56136700 | -1.74484300 |
| H  | -6.79283600 | -3.66612500 | 0.43963100  |
| C  | -4.66349200 | -0.54593300 | -2.31034700 |
| H  | -5.16811500 | 0.42749800  | -2.35768700 |
| H  | -3.60124600 | -0.34196300 | -2.48472900 |
| H  | -5.04569600 | -1.14527400 | -3.14042900 |
| C  | -3.58478400 | -1.02388300 | 2.58558400  |
| H  | -2.50547300 | -1.04622700 | 2.38697800  |
| H  | -3.80141300 | 0.01357000  | 2.86570300  |
| H  | -3.78942400 | -1.65389000 | 3.45384200  |
| C  | 3.46966500  | -1.65431100 | -2.47649500 |
| H  | 2.38788200  | -1.61763400 | -2.30842600 |
| H  | 3.72137000  | -0.70500900 | -2.96615600 |
| H  | 3.68511800  | -2.46043900 | -3.18216800 |
| C  | 4.77165100  | -0.03529400 | 2.15207200  |
| H  | 4.95249700  | -0.53020900 | 3.10958900  |
| H  | 5.54089900  | 0.74146500  | 2.04974600  |
| H  | 3.79340200  | 0.44752500  | 2.21736500  |
| Ni | -1.29871800 | -0.19167600 | -0.32637600 |
| Ni | 1.08716400  | -0.24587300 | 0.11011200  |
| C  | -1.30018600 | -2.13896900 | -0.04285200 |
| H  | -2.25448800 | -2.38521100 | 0.41418000  |
| C  | -1.19350600 | -1.91744600 | -1.45989000 |
| H  | -2.11665600 | -1.93341000 | -2.04031900 |
| H  | -0.36988900 | -2.38150000 | -1.99392700 |
| C  | -0.13568700 | -2.12484000 | 0.77327400  |
| H  | -0.28182700 | -2.07883200 | 1.84995400  |
| C  | 1.19249000  | -2.20657000 | 0.30353800  |
| H  | 1.96719200  | -2.40466300 | 1.04144900  |
| H  | 1.36969200  | -2.64965100 | -0.67758900 |
| Cl | 1.28952700  | 0.09606400  | 2.45863500  |
| C  | 0.44942400  | 0.09729700  | -2.75273600 |
| H  | 1.39351300  | 0.59672000  | -2.96783100 |
| H  | -0.22071600 | -0.05842400 | -3.59755000 |
| C  | 0.14810400  | -0.30822600 | -1.52168400 |

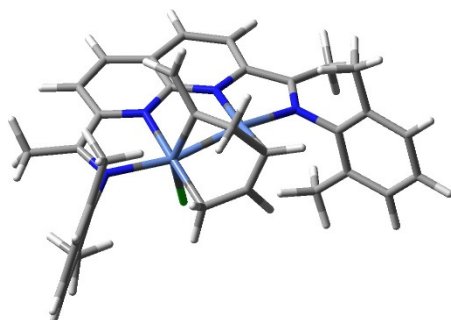

### Structure C

Charge = 0; Multiplicity = 2

Imaginary Frequencies = 0

Electronic Energy = -5012.69476665

Electronic Energy + ZPE = -5012.072531

Free Energy (298 K) = -5012.141977

|   |             |             |             |
|---|-------------|-------------|-------------|
| C | 2.41641900  | 3.69099200  | -0.11831800 |
| C | 1.26287200  | 4.46498000  | -0.06693900 |
| C | -0.00815600 | 3.85615000  | -0.09039700 |
| C | -0.03026200 | 2.43731500  | -0.21766600 |
| C | 2.30835400  | 2.29815200  | -0.19566200 |
| H | -1.30548500 | 5.58247800  | 0.12991900  |
| H | 3.39471300  | 4.15928200  | -0.07007600 |
| H | 1.33278300  | 5.54595200  | 0.01743200  |
| C | -1.26625600 | 4.50165300  | 0.02976600  |
| C | -2.37243500 | 2.35140400  | -0.05678700 |
| C | -2.42560100 | 3.75048100  | 0.06484700  |
| H | -3.38552200 | 4.23863300  | 0.20431400  |
| N | -1.17038300 | 1.72531300  | -0.25599200 |
| N | 1.09232000  | 1.71402000  | -0.27868400 |
| C | 3.39503400  | 1.33441000  | -0.12940300 |
| C | -3.44792200 | 1.42032800  | 0.07218700  |
| C | 4.81030400  | 1.80799100  | -0.10809400 |
| H | 5.00833800  | 2.47203300  | -0.95569300 |
| H | 5.01546700  | 2.38399800  | 0.80119000  |
| H | 5.50977000  | 0.97158800  | -0.14703400 |
| C | -4.83670500 | 1.83241700  | 0.42433200  |
| H | -5.06273100 | 2.83480500  | 0.05376700  |
| H | -5.57080600 | 1.13529300  | 0.01291900  |
| H | -4.98590300 | 1.84548400  | 1.51126200  |
| N | 3.02681200  | 0.07830200  | -0.07788500 |
| N | -3.08792000 | 0.14773700  | -0.08105500 |
| C | 3.97715400  | -0.96240100 | 0.09091800  |
| C | 4.54762200  | -1.18483100 | 1.35832700  |
| C | 4.26235000  | -1.80016900 | -1.00211600 |
| C | 5.42065100  | -2.26526000 | 1.50222300  |
| C | 5.14951300  | -2.85966300 | -0.81106800 |
| C | 5.72562000  | -3.09723000 | 0.43163900  |
| H | 5.86251500  | -2.44780100 | 2.47929900  |
| H | 5.38448200  | -3.50259600 | -1.65664500 |
| H | 6.40910500  | -3.93098300 | 0.56569800  |
| C | -3.99131200 | -0.89723800 | 0.23313600  |
| C | -4.05235700 | -1.34859100 | 1.56410100  |
| C | -4.72773400 | -1.51006700 | -0.79421500 |
| C | -4.88396700 | -2.43437300 | 1.84628100  |
| C | -5.54916100 | -2.58913100 | -0.46464400 |

|    |             |             |             |
|----|-------------|-------------|-------------|
| C  | -5.62805500 | -3.05028500 | 0.84548800  |
| H  | -4.93950500 | -2.79824400 | 2.86991200  |
| H  | -6.12556100 | -3.07175100 | -1.25100900 |
| H  | -6.26601500 | -3.89592800 | 1.08594900  |
| C  | -4.61426100 | -0.99943600 | -2.19673800 |
| H  | -3.56547300 | -0.93741200 | -2.51440600 |
| H  | -5.15228000 | -1.63942500 | -2.89999200 |
| H  | -5.01404000 | 0.01695700  | -2.29627800 |
| C  | -3.24435100 | -0.67763500 | 2.63206700  |
| H  | -2.18180000 | -0.58337900 | 2.36748500  |
| H  | -3.58733800 | 0.34772900  | 2.81743800  |
| H  | -3.31298500 | -1.22053000 | 3.57736100  |
| C  | 3.63701300  | -1.54320300 | -2.33612900 |
| H  | 2.54926100  | -1.67351200 | -2.30210800 |
| H  | 3.79154400  | -0.51115400 | -2.67269600 |
| H  | 4.03978500  | -2.21580500 | -3.09726600 |
| C  | 4.22499500  | -0.29754000 | 2.52011400  |
| H  | 3.14535900  | -0.13737100 | 2.62732900  |
| H  | 4.60601500  | -0.72573000 | 3.45017700  |
| H  | 4.68091200  | 0.69543800  | 2.41499000  |
| Ni | -1.23675400 | -0.15787800 | -0.45551500 |
| Ni | 1.00510700  | -0.19799100 | -0.06310100 |
| C  | 0.28991200  | -0.43499900 | -1.86943300 |
| C  | -1.26725500 | -2.02721100 | -1.05042900 |
| H  | -2.28085000 | -2.40628400 | -1.16314000 |
| C  | -0.37059400 | -1.76598000 | -2.22347800 |
| H  | -0.93344500 | -1.67897800 | -3.16007700 |
| H  | 0.37727500  | -2.56526400 | -2.37017500 |
| C  | -0.61648700 | -2.06011500 | 0.19506100  |
| H  | -1.20406800 | -2.25563800 | 1.09329900  |
| C  | 0.83274700  | -2.08015600 | 0.28597700  |
| H  | 1.23514800  | -2.27811600 | 1.27799000  |
| H  | 1.34079900  | -2.65093900 | -0.49894500 |
| Cl | 0.59933000  | 0.22711700  | 2.27400600  |
| C  | 0.58301800  | 0.43171500  | -2.86313900 |
| H  | 0.34033600  | 0.19436500  | -3.90078700 |
| H  | 1.05765700  | 1.39372300  | -2.69379100 |

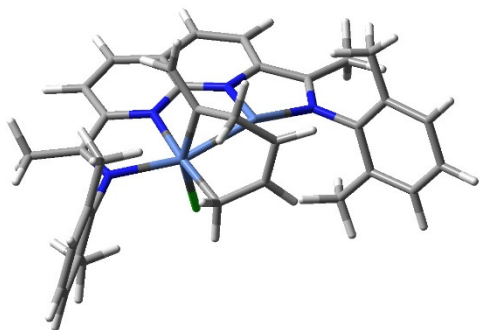

### Structure C

Charge = 0; Multiplicity = 4

Imaginary Frequencies = 0

Electronic Energy = -5012.66634089

Electronic Energy + ZPE = -5012.045929

Free Energy (298 K) = -5012.117894

|   |             |             |             |
|---|-------------|-------------|-------------|
| C | 2.42334600  | 3.68907700  | -0.11258200 |
| C | 1.27681300  | 4.47003200  | -0.05161200 |
| C | 0.00429100  | 3.86304600  | -0.05575700 |
| C | -0.02663500 | 2.44169600  | -0.18617200 |
| C | 2.31031700  | 2.29517700  | -0.17297600 |
| H | -1.27556400 | 5.59653500  | 0.18940600  |
| H | 3.40498500  | 4.15215300  | -0.08433200 |
| H | 1.35196500  | 5.55136300  | 0.02429400  |
| C | -1.24517200 | 4.51554500  | 0.08668300  |
| C | -2.35691100 | 2.37269300  | 0.01746500  |
| C | -2.40839200 | 3.76689800  | 0.15467000  |
| H | -3.36198800 | 4.25495700  | 0.33535100  |
| N | -1.17408400 | 1.74247900  | -0.23821900 |
| N | 1.09391600  | 1.70790500  | -0.23147800 |
| C | 3.41324500  | 1.34635000  | -0.11034600 |
| C | -3.45935500 | 1.45787100  | 0.20501000  |
| C | 4.81880900  | 1.85273200  | -0.07945300 |
| H | 5.01109200  | 2.50507000  | -0.93765400 |
| H | 5.00228800  | 2.44980300  | 0.82045400  |
| H | 5.53572100  | 1.03050400  | -0.09788600 |
| C | -4.83035300 | 1.95762800  | 0.52135900  |
| H | -5.14121000 | 2.73864400  | -0.17975600 |
| H | -5.56280600 | 1.14873300  | 0.48803900  |
| H | -4.86357600 | 2.39835300  | 1.52436600  |
| N | 3.07378000  | 0.08586700  | -0.07830700 |
| N | -3.14029600 | 0.18229200  | 0.12913200  |
| C | 4.03709600  | -0.93658400 | 0.10670800  |
| C | 4.61664700  | -1.13496300 | 1.37562000  |
| C | 4.33061100  | -1.79027300 | -0.97338700 |

|    |             |             |             |
|----|-------------|-------------|-------------|
| C  | 5.49709300  | -2.20738400 | 1.53442800  |
| C  | 5.22636000  | -2.83911800 | -0.76770000 |
| C  | 5.80569800  | -3.05471300 | 0.47758500  |
| H  | 5.94268600  | -2.37039500 | 2.51325300  |
| H  | 5.46637200  | -3.49151700 | -1.60462300 |
| H  | 6.49553800  | -3.88121500 | 0.62336200  |
| C  | -4.06774000 | -0.85811700 | 0.34902100  |
| C  | -4.07628300 | -1.48623500 | 1.60783700  |
| C  | -4.85701200 | -1.32423000 | -0.71674800 |
| C  | -4.91563200 | -2.58731300 | 1.78346800  |
| C  | -5.67937400 | -2.43014600 | -0.49565100 |
| C  | -5.71278100 | -3.05813700 | 0.74480700  |
| H  | -4.93484900 | -3.08079400 | 2.75292400  |
| H  | -6.29415600 | -2.79990100 | -1.31372300 |
| H  | -6.35515800 | -3.92017300 | 0.90039900  |
| C  | -4.78826200 | -0.64671900 | -2.05065800 |
| H  | -3.75416700 | -0.58792300 | -2.41692300 |
| H  | -5.38294200 | -1.17715100 | -2.79801600 |
| H  | -5.15168900 | 0.38751400  | -2.00948300 |
| C  | -3.20488300 | -0.96600800 | 2.70829200  |
| H  | -2.15733600 | -0.85461900 | 2.39583000  |
| H  | -3.51811700 | 0.03365600  | 3.03366200  |
| H  | -3.23524600 | -1.62145300 | 3.58166200  |
| C  | 3.71135700  | -1.55782300 | -2.31446000 |
| H  | 2.62459500  | -1.69551600 | -2.28557600 |
| H  | 3.86368000  | -0.53069200 | -2.66630700 |
| H  | 4.12361100  | -2.23994400 | -3.06199500 |
| C  | 4.30017600  | -0.23192600 | 2.52693100  |
| H  | 3.22180800  | -0.06661700 | 2.63204000  |
| H  | 4.67719000  | -0.65371600 | 3.46154600  |
| H  | 4.76515800  | 0.75571900  | 2.41268500  |
| Ni | -1.28588900 | -0.17983900 | -0.57004500 |
| Ni | 0.97842800  | -0.23340800 | -0.03409700 |
| C  | 0.40062700  | -0.44946200 | -1.93621800 |
| C  | -1.29245600 | -2.08596700 | -1.34497400 |
| H  | -2.30575300 | -2.40529900 | -1.58190000 |
| C  | -0.28676400 | -1.73917500 | -2.40396300 |
| H  | -0.75830600 | -1.59270500 | -3.38410100 |
| H  | 0.46369800  | -2.54042600 | -2.52988800 |
| C  | -0.77967000 | -2.19097600 | -0.06111700 |
| H  | -1.44422300 | -2.47514900 | 0.75708700  |
| C  | 0.66724900  | -2.13395700 | 0.18379600  |
| H  | 0.95779000  | -2.39744800 | 1.19977900  |
| H  | 1.25539600  | -2.68652000 | -0.56003300 |
| Cl | 0.68971600  | 0.07381600  | 2.25081200  |
| C  | 0.73212800  | 0.45796500  | -2.87771800 |

|   |            |            |             |
|---|------------|------------|-------------|
| H | 0.50286300 | 0.29345400 | -3.93439300 |
| H | 1.23603900 | 1.39406300 | -2.64837500 |

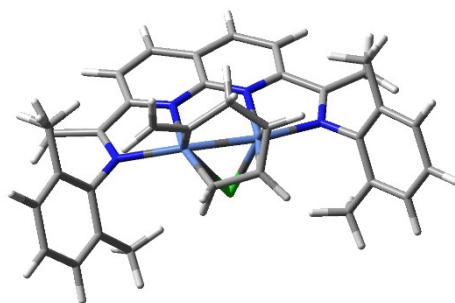

### Structure D

Charge = 0; Multiplicity = 2

Imaginary Frequencies = 1

Electronic Energy = -5012.65754439

Electronic Energy + ZPE = -5012.035848

Free Energy (298 K) = -5012.103909

|   |             |             |             |
|---|-------------|-------------|-------------|
| C | -2.34074500 | 3.74178400  | -0.09068400 |
| C | -1.18728900 | 4.50304500  | -0.09179500 |
| C | 0.06944900  | 3.86071600  | -0.03863800 |
| C | 0.06944200  | 2.43929200  | 0.09131300  |
| C | -2.26787300 | 2.34552700  | 0.00546500  |
| H | 1.36551800  | 5.58199500  | -0.22539600 |
| H | -3.31081900 | 4.22034600  | -0.18242200 |
| H | -1.23371500 | 5.58481300  | -0.17835900 |
| C | 1.32585600  | 4.50017500  | -0.13458000 |
| C | 2.40764000  | 2.35077900  | -0.06066800 |
| C | 2.48464500  | 3.74584400  | -0.16277700 |
| H | 3.45073200  | 4.22553000  | -0.28787600 |
| N | 1.21113600  | 1.72702400  | 0.13073600  |
| N | -1.06734700 | 1.71130300  | 0.16431000  |
| C | -3.39422600 | 1.45707600  | -0.12332300 |
| C | 3.51418200  | 1.43336000  | -0.16559300 |
| C | -4.76447300 | 2.01847000  | -0.33264600 |
| H | -4.76423000 | 2.72762500  | -1.16600500 |
| H | -5.48750800 | 1.23271800  | -0.55463900 |
| H | -5.11407100 | 2.56301200  | 0.55161000  |
| C | 4.91679600  | 1.94170800  | -0.23317600 |
| H | 5.20110300  | 2.47000800  | 0.68385700  |
| H | 5.62777300  | 1.13074300  | -0.39707700 |
| H | 5.02009100  | 2.65830700  | -1.05479000 |
| N | -3.10823300 | 0.17091300  | -0.12500300 |
| N | 3.17776500  | 0.16006500  | -0.23781300 |
| C | -4.12717800 | -0.80650800 | -0.21973900 |



|    |             |             |             |
|----|-------------|-------------|-------------|
| C  | -4.12239800 | -1.65079600 | -1.35007900 |
| C  | -5.07635200 | -0.98131500 | 0.81043200  |
| C  | -5.05067700 | -2.68888100 | -1.41240300 |
| C  | -5.98599100 | -2.03680600 | 0.70182700  |
| C  | -5.97477000 | -2.89072800 | -0.39318500 |
| H  | -5.04717200 | -3.33882700 | -2.28456000 |
| H  | -6.70796000 | -2.18540900 | 1.50224900  |
| H  | -6.68587900 | -3.70982100 | -0.45358100 |
| C  | 4.14348400  | -0.86730700 | -0.14429400 |
| C  | 4.28192800  | -1.75172200 | -1.23331600 |
| C  | 4.86059700  | -1.06680700 | 1.05401800  |
| C  | 5.16703400  | -2.82124200 | -1.11021100 |
| C  | 5.72353500  | -2.16276700 | 1.13428400  |
| C  | 5.88332400  | -3.03239500 | 0.06361700  |
| H  | 5.28620600  | -3.49908600 | -1.95258500 |
| H  | 6.26978000  | -2.33001100 | 2.06033600  |
| H  | 6.55920200  | -3.87888800 | 0.14542400  |
| C  | 4.70353000  | -0.14901700 | 2.22979400  |
| H  | 3.69211200  | 0.26587200  | 2.30026300  |
| H  | 4.92103900  | -0.67454000 | 3.16345300  |
| H  | 5.39305800  | 0.70288600  | 2.17924500  |
| C  | 3.50417200  | -1.52162400 | -2.48767100 |
| H  | 2.42569200  | -1.47521300 | -2.29381700 |
| H  | 3.75069600  | -0.55670200 | -2.94568300 |
| H  | 3.69673200  | -2.30602100 | -3.22319000 |
| C  | -5.12600200 | -0.08047200 | 2.00890600  |
| H  | -5.43422900 | -0.63728800 | 2.89833600  |
| H  | -4.15569000 | 0.37629600  | 2.22296800  |
| H  | -5.85439700 | 0.72921100  | 1.87578600  |
| C  | -3.19729300 | -1.38201500 | -2.49222000 |
| H  | -2.19566200 | -1.08426700 | -2.16954600 |
| H  | -3.11170000 | -2.24904100 | -3.15136800 |
| H  | -3.56071900 | -0.54238100 | -3.09827500 |
| Ni | 1.20770200  | -0.18656100 | -0.06270500 |
| Ni | -1.11168300 | -0.22178100 | 0.16831400  |
| C  | -1.04163200 | -1.16669700 | 1.81390400  |
| C  | 1.35540700  | -1.37375500 | 1.46200800  |
| H  | 2.38042600  | -1.51853200 | 1.79984000  |
| C  | 0.30705100  | -1.05314300 | 2.48690600  |
| H  | 0.44376200  | -0.04416100 | 2.90165500  |
| H  | 0.37218700  | -1.74972300 | 3.33956100  |
| C  | 0.89162400  | -2.05868900 | 0.30844300  |
| H  | 1.52787700  | -2.74716300 | -0.25004800 |
| C  | -0.59410800 | -2.17198700 | 0.22189500  |
| H  | -0.96130200 | -2.08580100 | -0.81406500 |
| H  | -1.04451300 | -3.07551400 | 0.63357300  |

|    |             |             |             |
|----|-------------|-------------|-------------|
| Cl | 0.17469300  | -0.06218800 | -2.20454100 |
| C  | -2.13930300 | -1.51261300 | 2.51365400  |
| H  | -3.08441000 | -1.75767300 | 2.04321100  |
| H  | -2.09787200 | -1.58063400 | 3.59967000  |

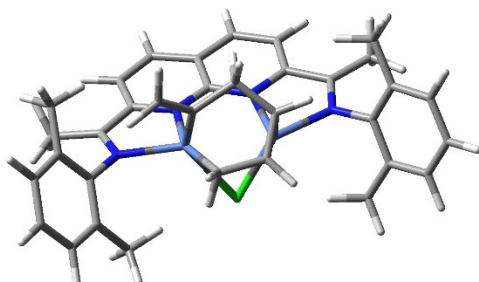

### Structure D

Charge = 0; Multiplicity = 4

Imaginary Frequencies = 1

Electronic Energy = -5012.64816860

Electronic Energy + ZPE = -5012.027964

Free Energy (298 K) = -5012.098031

|   |             |            |             |
|---|-------------|------------|-------------|
| C | -2.35430500 | 3.70258100 | -0.25042400 |
| C | -1.19494200 | 4.44611900 | -0.15838000 |
| C | 0.04995300  | 3.78982600 | -0.09207900 |
| C | 0.05722900  | 2.35314900 | -0.11070900 |
| C | -2.28793900 | 2.30640400 | -0.22695700 |
| H | 1.30515400  | 5.54378100 | 0.03103100  |
| H | -3.31930100 | 4.19350100 | -0.32767100 |
| H | -1.22413100 | 5.53215400 | -0.14793600 |
| C | 1.28977500  | 4.45805800 | -0.00539600 |
| C | 2.40534400  | 2.32978900 | -0.03884800 |
| C | 2.45805000  | 3.72672500 | 0.02876900  |
| H | 3.42064300  | 4.22472500 | 0.09629600  |
| N | 1.21414000  | 1.65295500 | -0.11426300 |
| N | -1.09425100 | 1.64252100 | -0.12605100 |
| C | -3.45029600 | 1.45851300 | -0.30081800 |
| C | 3.56680700  | 1.48745400 | -0.05210000 |
| C | -4.80089700 | 2.06342400 | -0.52006000 |
| H | -4.79165400 | 2.70747400 | -1.40476000 |
| H | -5.56140800 | 1.29484700 | -0.66328600 |
| H | -5.10494200 | 2.68930200 | 0.32603200  |
| C | 4.93924200  | 2.07446600 | 0.02760200  |
| H | 5.10436500  | 2.58715700 | 0.98197100  |
| H | 5.70527900  | 1.30549600 | -0.08253000 |
| H | 5.08651000  | 2.81944300 | -0.76085600 |
| N | -3.22430800 | 0.16584500 | -0.21148800 |

|    |             |             |             |
|----|-------------|-------------|-------------|
| N  | 3.31875600  | 0.19807000  | -0.17535900 |
| C  | -4.28025800 | -0.76762700 | -0.13319500 |
| C  | -4.37920900 | -1.75375800 | -1.13650000 |
| C  | -5.15359900 | -0.77112000 | 0.97663800  |
| C  | -5.35638400 | -2.74032200 | -1.00882600 |
| C  | -6.11185900 | -1.78336600 | 1.06159500  |
| C  | -6.21866500 | -2.76236600 | 0.08235900  |
| H  | -5.43766400 | -3.49811700 | -1.78516400 |
| H  | -6.77605500 | -1.79907300 | 1.92321300  |
| H  | -6.96780800 | -3.54385500 | 0.17114200  |
| C  | 4.32134100  | -0.78465000 | -0.04861200 |
| C  | 4.55853200  | -1.63519400 | -1.14814800 |
| C  | 4.97355300  | -0.99067800 | 1.18482800  |
| C  | 5.48553400  | -2.66534900 | -1.00569300 |
| C  | 5.88677000  | -2.04341000 | 1.28252100  |
| C  | 6.15121100  | -2.87130800 | 0.19906700  |
| H  | 5.68092800  | -3.31468000 | -1.85632100 |
| H  | 6.38722500  | -2.21281000 | 2.23371300  |
| H  | 6.86504200  | -3.68422400 | 0.29615300  |
| C  | 4.69410800  | -0.12549800 | 2.37752300  |
| H  | 3.65693000  | 0.22584200  | 2.39977500  |
| H  | 4.88896900  | -0.66981300 | 3.30531300  |
| H  | 5.32914900  | 0.76887000  | 2.39584800  |
| C  | 3.83657900  | -1.39936900 | -2.43632500 |
| H  | 2.75681300  | -1.27837400 | -2.28079400 |
| H  | 4.16585200  | -0.47126900 | -2.91843100 |
| H  | 3.99412700  | -2.21887000 | -3.14089400 |
| C  | -5.06357500 | 0.25511200  | 2.06644000  |
| H  | -5.37944900 | -0.17238700 | 3.02212800  |
| H  | -4.04559800 | 0.63525300  | 2.19208500  |
| H  | -5.71839000 | 1.11406900  | 1.87369900  |
| C  | -3.49346300 | -1.69246900 | -2.34112000 |
| H  | -2.47350600 | -1.38028400 | -2.09381400 |
| H  | -3.44856200 | -2.65496100 | -2.85643000 |
| H  | -3.85667800 | -0.94979900 | -3.06214400 |
| Ni | 1.40424700  | -0.31786800 | -0.33292200 |
| Ni | -1.26756400 | -0.32273600 | -0.00228400 |
| C  | -1.05679500 | -0.99733500 | 1.75890900  |
| C  | 1.33876900  | -1.36078200 | 1.35998700  |
| H  | 2.35668000  | -1.52805700 | 1.70970100  |
| C  | 0.33340600  | -0.76416900 | 2.30853700  |
| H  | 0.52163200  | 0.30742500  | 2.47218300  |
| H  | 0.42534200  | -1.24439900 | 3.29519000  |
| C  | 0.80751200  | -2.15120800 | 0.33453900  |
| H  | 1.41052300  | -2.91384500 | -0.16199500 |
| C  | -0.68153900 | -2.23644900 | 0.26285500  |

|    |             |             |             |
|----|-------------|-------------|-------------|
| H  | -1.04955000 | -2.28717900 | -0.77571400 |
| H  | -1.12012800 | -3.08101100 | 0.79498400  |
| Cl | 0.10867600  | -0.42074500 | -2.26496800 |
| C  | -2.08980400 | -1.28235100 | 2.57322900  |
| H  | -3.05925700 | -1.59366100 | 2.19625000  |
| H  | -1.98319900 | -1.21588100 | 3.65513300  |

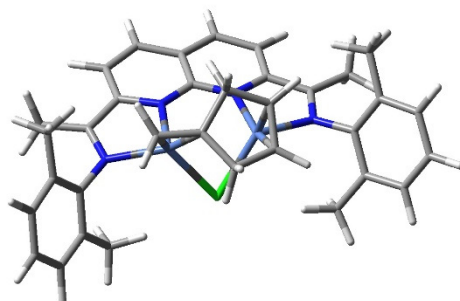

### Structure E

Charge = 0; Multiplicity = 2

Imaginary Frequencies = 1

Electronic Energy = -5012.71687719

Electronic Energy + ZPE = -5012.092769

Free Energy (298 K) = -5012.162151

|   |             |            |             |
|---|-------------|------------|-------------|
| C | 2.43277300  | 3.71248500 | -0.03230300 |
| C | 1.27416000  | 4.45026800 | 0.06130800  |
| C | 0.03536900  | 3.78259700 | 0.15347600  |
| C | 0.02041000  | 2.35113200 | 0.02818700  |
| C | 2.37047100  | 2.31452800 | -0.08393800 |
| H | -1.18998400 | 5.52754500 | 0.48006300  |
| H | 3.40025900  | 4.20450700 | -0.03354400 |
| H | 1.29955300  | 5.53448200 | 0.12546900  |
| C | -1.18548500 | 4.44492700 | 0.38766400  |
| C | -2.30060700 | 2.31979900 | 0.40079600  |
| C | -2.34341200 | 3.71198500 | 0.53308900  |
| H | -3.28634600 | 4.20431500 | 0.74829900  |
| N | -1.13770800 | 1.65582200 | 0.09966700  |
| N | 1.16657200  | 1.64413100 | -0.16125600 |
| C | 3.53480200  | 1.48587700 | 0.03915700  |
| C | -3.46533700 | 1.48425100 | 0.53874100  |
| C | 4.90298900  | 2.09218700 | 0.07245800  |
| H | 4.97247100  | 2.86144700 | 0.84753300  |
| H | 5.66237100  | 1.33752900 | 0.28151000  |
| H | 5.15675800  | 2.57241600 | -0.87961600 |
| C | -4.79945600 | 2.09838400 | 0.82498300  |
| H | -5.14020400 | 2.74253000 | 0.00697500  |
| H | -5.55814700 | 1.33342700 | 0.99487100  |

|    |             |             |             |
|----|-------------|-------------|-------------|
| H  | -4.74329300 | 2.72489200  | 1.72086100  |
| N  | 3.30035500  | 0.19392700  | 0.17934900  |
| N  | -3.25741700 | 0.18685700  | 0.43622200  |
| C  | 4.35774700  | -0.74520500 | 0.27908900  |
| C  | 4.49803200  | -1.43639700 | 1.50092300  |
| C  | 5.19409400  | -1.03608600 | -0.81665600 |
| C  | 5.46664200  | -2.43337100 | 1.59732800  |
| C  | 6.14127200  | -2.05562600 | -0.67693200 |
| C  | 6.27818900  | -2.75476200 | 0.51363300  |
| H  | 5.58103200  | -2.96000200 | 2.54228000  |
| H  | 6.77957200  | -2.29326300 | -1.52571200 |
| H  | 7.02064800  | -3.54284000 | 0.60186600  |
| C  | -4.32258400 | -0.73148100 | 0.31365200  |
| C  | -4.36652100 | -1.80979000 | 1.22484800  |
| C  | -5.23586600 | -0.65721400 | -0.76017900 |
| C  | -5.35216700 | -2.78069100 | 1.06731100  |
| C  | -6.19397200 | -1.66756500 | -0.88761000 |
| C  | -6.26391200 | -2.71640100 | 0.01723100  |
| H  | -5.39294000 | -3.60346400 | 1.77779500  |
| H  | -6.89101600 | -1.62036900 | -1.72191800 |
| H  | -7.01844800 | -3.48899400 | -0.09944300 |
| C  | -5.21599600 | 0.44501600  | -1.77784900 |
| H  | -4.24759700 | 0.94757400  | -1.84664900 |
| H  | -5.46102700 | 0.05433400  | -2.76982400 |
| H  | -5.96259500 | 1.21671000  | -1.55280300 |
| C  | -3.36014700 | -1.89815500 | 2.32541000  |
| H  | -2.34351900 | -1.99801800 | 1.92445100  |
| H  | -3.34106600 | -0.99155400 | 2.93945500  |
| H  | -3.55888800 | -2.75240100 | 2.97662000  |
| C  | 5.12234000  | -0.27663600 | -2.10826200 |
| H  | 5.16170100  | -0.95366700 | -2.96718100 |
| H  | 4.21307700  | 0.32086700  | -2.19473200 |
| H  | 5.97227500  | 0.40997000  | -2.20836000 |
| C  | 3.65457600  | -1.06195400 | 2.67728800  |
| H  | 2.58488700  | -1.16386200 | 2.46651700  |
| H  | 3.89517800  | -1.67916200 | 3.54594400  |
| H  | 3.80449800  | -0.01226300 | 2.95600700  |
| Ni | -1.38115400 | -0.29746800 | -0.04424500 |
| Ni | 1.42893100  | -0.32890800 | -0.25856900 |
| C  | 0.52052000  | -1.37192700 | -1.75450100 |
| C  | -1.76402100 | -0.88051700 | -1.85470200 |
| H  | -2.72770900 | -0.57270100 | -2.25426400 |
| C  | -0.48556800 | -0.62243000 | -2.60523300 |
| H  | -0.23682400 | 0.43791800  | -2.73574600 |
| H  | -0.51774700 | -1.06894800 | -3.61626600 |
| C  | -1.60316700 | -2.00490400 | -1.00178000 |

|    |             |             |             |
|----|-------------|-------------|-------------|
| H  | -2.43662900 | -2.62941200 | -0.68164900 |
| C  | -0.21727800 | -2.57347300 | -1.19160300 |
| H  | 0.23126400  | -2.97774000 | -0.27685200 |
| H  | -0.22248300 | -3.38843600 | -1.93731200 |
| Cl | 0.14430900  | -0.92866600 | 1.69760900  |
| C  | 1.90253000  | -1.26069900 | -1.92874900 |
| H  | 2.56949500  | -2.07856200 | -1.64524000 |
| H  | 2.28925600  | -0.60302100 | -2.70547100 |

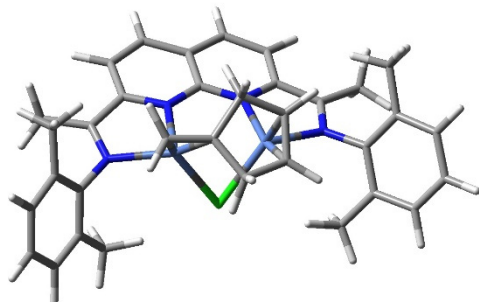

### Structure E

Charge = 0; Multiplicity = 4

Imaginary Frequencies = 1

Electronic Energy = -5012.71945264

Electronic Energy + ZPE = -5012.095618

Free Energy (298 K) = -5012.165660

|   |             |            |             |
|---|-------------|------------|-------------|
| C | 2.42696100  | 3.70863800 | -0.03476700 |
| C | 1.26552900  | 4.44589400 | 0.03657000  |
| C | 0.02712700  | 3.77885100 | 0.13583500  |
| C | 0.01663600  | 2.34523800 | 0.03014900  |
| C | 2.36633700  | 2.31058800 | -0.06764000 |
| H | -1.20443800 | 5.52518300 | 0.43369000  |
| H | 3.39342200  | 4.20276500 | -0.03846700 |
| H | 1.28861600  | 5.53148200 | 0.07373000  |
| C | -1.19583400 | 4.44141100 | 0.35812600  |
| C | -2.30550000 | 2.31216500 | 0.40228000  |
| C | -2.35034000 | 3.70510800 | 0.51669300  |
| H | -3.29441400 | 4.19632600 | 0.73022100  |
| N | -1.13959600 | 1.64406000 | 0.11278500  |
| N | 1.16410800  | 1.63989000 | -0.13669200 |
| C | 3.53415200  | 1.48329900 | 0.06756600  |
| C | -3.46597400 | 1.47673300 | 0.56228800  |
| C | 4.89490500  | 2.10302000 | 0.14267000  |
| H | 4.94456600  | 2.84176300 | 0.94856100  |
| H | 5.66040300  | 1.34889400 | 0.32970900  |
| H | 5.15176600  | 2.62486600 | -0.78619200 |

|    |             |             |             |
|----|-------------|-------------|-------------|
| C  | -4.78957300 | 2.08568100  | 0.90340600  |
| H  | -5.15061700 | 2.74797300  | 0.10863900  |
| H  | -5.54491600 | 1.31713500  | 1.07270900  |
| H  | -4.70955000 | 2.69240400  | 1.81097700  |
| N  | 3.31173900  | 0.19008500  | 0.17888400  |
| N  | -3.26539400 | 0.18331800  | 0.41473200  |
| C  | 4.37509800  | -0.74088300 | 0.27874200  |
| C  | 4.51417500  | -1.44724900 | 1.49168300  |
| C  | 5.21818000  | -1.01213600 | -0.81716100 |
| C  | 5.48887600  | -2.43898300 | 1.57955000  |
| C  | 6.17136200  | -2.02715100 | -0.68622800 |
| C  | 6.30756800  | -2.74105800 | 0.49565800  |
| H  | 5.60240900  | -2.97705800 | 2.51818000  |
| H  | 6.81483700  | -2.24947700 | -1.53524200 |
| H  | 7.05450000  | -3.52559800 | 0.57697700  |
| C  | -4.33259100 | -0.73211500 | 0.31221100  |
| C  | -4.36387900 | -1.82236000 | 1.20939200  |
| C  | -5.26727700 | -0.64031200 | -0.74202700 |
| C  | -5.35460400 | -2.78902300 | 1.05602700  |
| C  | -6.23171800 | -1.64474300 | -0.86443900 |
| C  | -6.28698000 | -2.70749400 | 0.02552500  |
| H  | -5.38449000 | -3.62105900 | 1.75634700  |
| H  | -6.94593700 | -1.58191100 | -1.68310900 |
| H  | -7.04620200 | -3.47602000 | -0.08714800 |
| C  | -5.25893400 | 0.47801300  | -1.74207700 |
| H  | -4.28326000 | 0.96340000  | -1.83089000 |
| H  | -5.54174900 | 0.10924900  | -2.73231200 |
| H  | -5.98242000 | 1.26068300  | -1.48161700 |
| C  | -3.34136700 | -1.92547300 | 2.29382100  |
| H  | -2.33241300 | -2.03866500 | 1.87772200  |
| H  | -3.30117900 | -1.01984100 | 2.90854400  |
| H  | -3.54007400 | -2.77807900 | 2.94723200  |
| C  | 5.14659000  | -0.23226800 | -2.09634700 |
| H  | 5.24955100  | -0.88902500 | -2.96547600 |
| H  | 4.20926300  | 0.31757800  | -2.20056000 |
| H  | 5.96022100  | 0.50149400  | -2.15753500 |
| C  | 3.66233000  | -1.09432100 | 2.66870000  |
| H  | 2.59503600  | -1.21011200 | 2.45385200  |
| H  | 3.90850100  | -1.71520800 | 3.53311800  |
| H  | 3.79561700  | -0.04481800 | 2.95673500  |
| Ni | -1.37059500 | -0.30328700 | -0.05289800 |
| Ni | 1.41731200  | -0.33851900 | -0.24699400 |
| C  | 0.51688100  | -1.35950200 | -1.77668600 |
| C  | -1.76983100 | -0.89228400 | -1.87312900 |
| H  | -2.73891100 | -0.57894200 | -2.25445600 |
| C  | -0.49517700 | -0.61365900 | -2.62277800 |

|    |             |             |             |
|----|-------------|-------------|-------------|
| H  | -0.25764500 | 0.45031900  | -2.74396100 |
| H  | -0.52173500 | -1.05120500 | -3.63813200 |
| C  | -1.59640400 | -2.01598500 | -1.02981200 |
| H  | -2.42477100 | -2.63999500 | -0.69656100 |
| C  | -0.20702100 | -2.57227400 | -1.22236500 |
| H  | 0.24571300  | -2.97578400 | -0.30899200 |
| H  | -0.20339600 | -3.38481200 | -1.97080400 |
| Cl | 0.15138100  | -0.93228200 | 1.68234800  |
| C  | 1.89777900  | -1.23343300 | -1.94665500 |
| H  | 2.57292500  | -2.04761000 | -1.67263700 |
| H  | 2.27834100  | -0.56000500 | -2.71246000 |

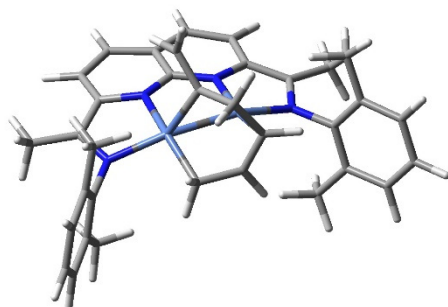

### Structure F

Charge = 0; Multiplicity = 1

Imaginary Frequencies = 0

Electronic Energy = -4552.46530961

Electronic Energy + ZPE = -4551.845475

Free Energy (298 K) = -4551.911878

|   |             |            |             |
|---|-------------|------------|-------------|
| C | -2.53795600 | 3.68793600 | -0.20350500 |
| C | -1.38363000 | 4.45761800 | -0.31030200 |
| C | -0.11108300 | 3.85418600 | -0.24628800 |
| C | -0.07686500 | 2.45148600 | 0.05627500  |
| C | -2.43325400 | 2.31816700 | 0.03344900  |
| H | 1.15273300  | 5.54603100 | -0.71931000 |
| H | -3.51075600 | 4.14365500 | -0.36243500 |
| H | -1.45279600 | 5.52010600 | -0.52653700 |
| C | 1.13013700  | 4.48318500 | -0.49706000 |
| C | 2.26828900  | 2.35825600 | -0.28040100 |
| C | 2.29377400  | 3.73089100 | -0.53953600 |
| H | 3.23301800  | 4.20660100 | -0.80763400 |
| N | 1.07686000  | 1.76041100 | 0.12536100  |
| N | -1.19764200 | 1.76115800 | 0.28727000  |
| C | -3.44307100 | 1.32238900 | -0.12332300 |
| C | 3.30525100  | 1.41933300 | -0.45810500 |
| C | -4.89564300 | 1.64225800 | -0.22655100 |
| H | -5.08349000 | 2.71511300 | -0.16865700 |



|    |             |             |             |
|----|-------------|-------------|-------------|
| H  | -5.32770000 | 1.26270200  | -1.15909700 |
| H  | -5.45172600 | 1.15653100  | 0.58339300  |
| C  | 4.70461400  | 1.78213900  | -0.82076600 |
| H  | 5.41695900  | 1.44376700  | -0.05913000 |
| H  | 5.00898900  | 1.29617000  | -1.75527800 |
| H  | 4.82904200  | 2.85919000  | -0.94030200 |
| N  | -2.98668900 | 0.06969400  | -0.19177200 |
| N  | 2.92250300  | 0.13346100  | -0.32652600 |
| C  | -3.89144300 | -1.00504000 | -0.37573800 |
| C  | -4.25468900 | -1.37439000 | -1.68193400 |
| C  | -4.33639100 | -1.73320900 | 0.74118100  |
| C  | -5.09987100 | -2.47238300 | -1.85105500 |
| C  | -5.17723800 | -2.82620000 | 0.52851600  |
| C  | -5.56273300 | -3.19407700 | -0.75638900 |
| H  | -5.38636900 | -2.76411800 | -2.85940100 |
| H  | -5.52766600 | -3.39401200 | 1.38801600  |
| H  | -6.21755000 | -4.04818800 | -0.90478200 |
| C  | 3.88309200  | -0.89911000 | -0.44179600 |
| C  | 3.98270000  | -1.59899200 | -1.65712500 |
| C  | 4.66716700  | -1.25730000 | 0.67154000  |
| C  | 4.89219300  | -2.65479600 | -1.74588900 |
| C  | 5.56245700  | -2.31987900 | 0.54266500  |
| C  | 5.67879200  | -3.01463300 | -0.65716200 |
| H  | 4.97751900  | -3.19837800 | -2.68466600 |
| H  | 6.16855800  | -2.60518600 | 1.39993900  |
| H  | 6.37830000  | -3.84163400 | -0.74117700 |
| C  | 4.50544400  | -0.52150600 | 1.96533900  |
| H  | 3.44922400  | -0.47387800 | 2.26202900  |
| H  | 5.07226100  | -0.99703600 | 2.76922200  |
| H  | 4.83682600  | 0.52154200  | 1.89482900  |
| C  | 3.14111900  | -1.19027000 | -2.82614500 |
| H  | 2.08582600  | -1.09509100 | -2.54673000 |
| H  | 3.43250800  | -0.20541600 | -3.21067400 |
| H  | 3.22424900  | -1.90652200 | -3.64720500 |
| C  | -3.88702100 | -1.34091500 | 2.11335500  |
| H  | -2.79386000 | -1.39630000 | 2.20179200  |
| H  | -4.14338500 | -0.30214400 | 2.35324300  |
| H  | -4.32767500 | -1.98443300 | 2.87857100  |
| C  | -3.71644400 | -0.61263400 | -2.85298600 |
| H  | -2.62084200 | -0.58118300 | -2.83435800 |
| H  | -4.03317900 | -1.06087600 | -3.79779200 |
| H  | -4.04238100 | 0.43450300  | -2.85598100 |
| Ni | 1.16253600  | -0.09414600 | 0.40130600  |
| Ni | -1.15792100 | -0.14101800 | 0.41195800  |
| C  | -0.09358900 | -0.24063700 | 2.01518400  |
| C  | -0.45345800 | 0.65799500  | 2.95721400  |

|   |             |             |             |
|---|-------------|-------------|-------------|
| C | 1.32094900  | -1.91741400 | 1.17484200  |
| H | 2.34763100  | -2.27389000 | 1.21608400  |
| C | 0.54594600  | -1.56521800 | 2.40665100  |
| H | 1.19378900  | -1.44568200 | 3.28194100  |
| H | -0.21247300 | -2.32641100 | 2.66211800  |
| C | 0.57185500  | -2.03041500 | -0.00483700 |
| H | 1.09182100  | -2.34056300 | -0.91395500 |
| C | -0.88897100 | -1.99297400 | 0.01284000  |
| H | -1.35636100 | -2.23710800 | -0.94575500 |
| H | -1.32902000 | -2.60442300 | 0.81323500  |
| H | -0.87258300 | 1.62957800  | 2.71656800  |
| H | -0.30645300 | 0.43543700  | 4.01521300  |

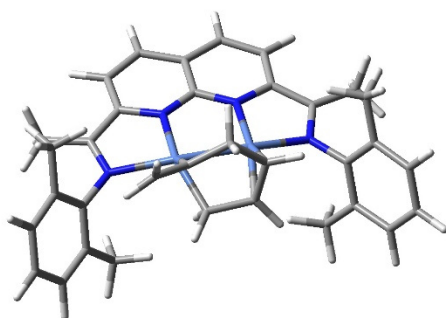

### Structure G

Charge = 0; Multiplicity = 1

Imaginary Frequencies = 1

Electronic Energy = -4552.41752385

Electronic Energy + ZPE = -4551.797301

Free Energy (298 K) = -4551.863123

|   |             |            |             |
|---|-------------|------------|-------------|
| C | 2.35303700  | 3.76326800 | 0.15968400  |
| C | 1.19387400  | 4.52959800 | 0.16403000  |
| C | -0.06460100 | 3.90244900 | 0.09603000  |
| C | -0.06753000 | 2.47549000 | -0.06369200 |
| C | 2.28275400  | 2.37820300 | 0.03598500  |
| H | -1.36310300 | 5.61670000 | 0.32103700  |
| H | 3.32144300  | 4.23998600 | 0.27984500  |
| H | 1.24597200  | 5.60877400 | 0.27699500  |
| C | -1.32275200 | 4.53748400 | 0.20594400  |
| C | -2.43380300 | 2.39350400 | 0.10791600  |
| C | -2.48489400 | 3.78125900 | 0.23139100  |
| H | -3.44710000 | 4.26763800 | 0.36789500  |
| N | -1.20974000 | 1.76726900 | -0.12336000 |
| N | 1.06296200  | 1.75759300 | -0.16754800 |
| C | 3.37477000  | 1.47529300 | 0.20281100  |
| C | -3.50447400 | 1.47908300 | 0.24299500  |
| C | 4.75528300  | 2.01049400 | 0.42971900  |

|    |             |             |             |
|----|-------------|-------------|-------------|
| H  | 4.76924500  | 2.68137400  | 1.29479600  |
| H  | 5.47358900  | 1.21059400  | 0.61287900  |
| H  | 5.10492500  | 2.59522000  | -0.42789500 |
| C  | -4.91979200 | 1.92676000  | 0.40835900  |
| H  | -5.54923500 | 1.11596500  | 0.78269900  |
| H  | -4.99100100 | 2.76289700  | 1.11011300  |
| H  | -5.35393700 | 2.27135300  | -0.53829300 |
| N  | 3.06050700  | 0.18491200  | 0.23934800  |
| N  | -3.13410200 | 0.19084800  | 0.25914400  |
| C  | 4.08068500  | -0.78315900 | 0.37237200  |
| C  | 4.13900200  | -1.54152200 | 1.55846800  |
| C  | 4.98532100  | -1.03065800 | -0.68313000 |
| C  | 5.09320000  | -2.55408900 | 1.66324100  |
| C  | 5.92019000  | -2.05727000 | -0.53721700 |
| C  | 5.97627800  | -2.82058100 | 0.62297700  |
| H  | 5.14266300  | -3.13321900 | 2.58311300  |
| H  | 6.60800800  | -2.25795100 | -1.35631700 |
| H  | 6.70910300  | -3.61666900 | 0.71870500  |
| C  | -4.07191900 | -0.85844100 | 0.31629000  |
| C  | -4.13578500 | -1.62375100 | 1.49814000  |
| C  | -4.84167200 | -1.20693000 | -0.81154200 |
| C  | -4.98161500 | -2.73206300 | 1.53598600  |
| C  | -5.67363100 | -2.32583900 | -0.73269100 |
| C  | -5.74743800 | -3.08531300 | 0.42928300  |
| H  | -5.03539000 | -3.32235800 | 2.44848600  |
| H  | -6.26381500 | -2.60351300 | -1.60365800 |
| H  | -6.39565400 | -3.95606400 | 0.47021400  |
| C  | -4.75132700 | -0.40290400 | -2.07210300 |
| H  | -3.72036500 | -0.09099100 | -2.27665800 |
| H  | -5.11943800 | -0.97096100 | -2.93040700 |
| H  | -5.34655300 | 0.51679400  | -2.01657000 |
| C  | -3.32118200 | -1.21950200 | 2.68680600  |
| H  | -2.27616800 | -1.03872800 | 2.40717000  |
| H  | -3.67801400 | -0.27468500 | 3.11416400  |
| H  | -3.35396600 | -1.97836900 | 3.47253000  |
| C  | 4.92290400  | -0.23094700 | -1.94836700 |
| H  | 5.41794700  | -0.75838300 | -2.76784400 |
| H  | 3.88636300  | -0.03337000 | -2.24268800 |
| H  | 5.41864100  | 0.74235100  | -1.84696400 |
| C  | 3.22875900  | -1.23064200 | 2.70603500  |
| H  | 2.18575900  | -1.48891900 | 2.49156800  |
| H  | 3.52447500  | -1.78277600 | 3.60164300  |
| H  | 3.23084100  | -0.16211300 | 2.94569500  |
| Ni | -1.25987400 | -0.09184200 | -0.21161900 |
| Ni | 1.05870000  | -0.13565100 | -0.26512000 |
| C  | 0.98085700  | -1.48577300 | -1.57949500 |

|   |             |             |             |
|---|-------------|-------------|-------------|
| C | 2.09310300  | -2.07844500 | -2.05288100 |
| C | -1.40354900 | -1.68247700 | -1.31269900 |
| H | -2.42223800 | -1.90939500 | -1.62432600 |
| C | -0.31943400 | -1.56022500 | -2.33977200 |
| H | -0.46020300 | -0.67329300 | -2.97266700 |
| H | -0.32558200 | -2.42950300 | -3.01818300 |
| C | -0.98151000 | -2.00757000 | -0.00956100 |
| H | -1.64084900 | -2.50550500 | 0.70293800  |
| C | 0.48179100  | -1.92159400 | 0.23193300  |
| H | 0.69431700  | -1.34978700 | 1.17043400  |
| H | 1.05928000  | -2.84807800 | 0.30574500  |
| H | 2.11714800  | -2.46523100 | -3.07095700 |
| H | 2.99898900  | -2.19348000 | -1.46909100 |

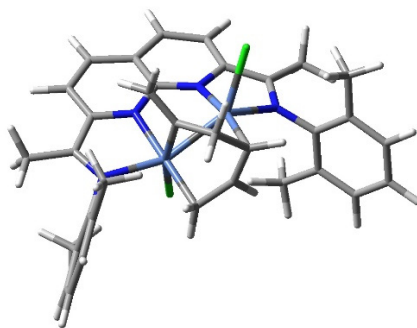

### Structure H

Charge = 0; Multiplicity = 1

Imaginary Frequencies = 0

Electronic Energy = -5472.89020088

Electronic Energy + ZPE = -5472.264703

Free Energy (298 K) = -5472.334421

|   |             |            |             |
|---|-------------|------------|-------------|
| C | -2.42457300 | 3.66344200 | -0.18039000 |
| C | -1.28315100 | 4.41391900 | -0.38144700 |
| C | -0.01618000 | 3.78855400 | -0.39343100 |
| C | 0.00107000  | 2.39867300 | -0.11784100 |
| C | -2.31497600 | 2.27160800 | 0.02188100  |
| H | 1.27543400  | 5.45526800 | -0.90835400 |
| H | -3.40307000 | 4.13222400 | -0.20547700 |
| H | -1.35348400 | 5.48342900 | -0.55973900 |
| C | 1.23066700  | 4.39156600 | -0.69363200 |
| C | 2.29534600  | 2.23094000 | -0.47909800 |
| C | 2.36659000  | 3.61346900 | -0.75289100 |
| H | 3.32288000  | 4.05677100 | -1.01307500 |
| N | 1.12892600  | 1.66237500 | -0.12864300 |
| N | -1.11806700 | 1.68835400 | 0.09561800  |
| C | -3.43493600 | 1.31816000 | 0.04938400  |
| C | 3.37840200  | 1.26386200 | -0.60154500 |

|    |             |             |             |
|----|-------------|-------------|-------------|
| C  | -4.83226200 | 1.83922300  | 0.04661200  |
| H  | -4.98810200 | 2.50894200  | 0.89940100  |
| H  | -5.03423300 | 2.42356800  | -0.85780500 |
| H  | -5.55745400 | 1.02655800  | 0.10038900  |
| C  | 4.71852000  | 1.68104000  | -1.10186300 |
| H  | 5.18416500  | 2.38316700  | -0.40111300 |
| H  | 5.37935900  | 0.82007300  | -1.21445200 |
| H  | 4.64288200  | 2.19052000  | -2.06835800 |
| N  | -3.09947100 | 0.06133500  | 0.03356500  |
| N  | 3.04052300  | 0.04369900  | -0.28254200 |
| C  | -4.08153100 | -0.95498500 | -0.14996700 |
| C  | -4.64381200 | -1.13452100 | -1.43047000 |
| C  | -4.41410400 | -1.80122000 | 0.92325200  |
| C  | -5.53219800 | -2.19663000 | -1.61234200 |
| C  | -5.32066600 | -2.83657400 | 0.69100300  |
| C  | -5.87094100 | -3.04579500 | -0.56712400 |
| H  | -5.96078400 | -2.34725400 | -2.60040100 |
| H  | -5.59217700 | -3.48306000 | 1.52250000  |
| H  | -6.56593700 | -3.86440700 | -0.73063500 |
| C  | 3.87744600  | -1.06990700 | -0.55263800 |
| C  | 3.67976800  | -1.72239300 | -1.78581800 |
| C  | 4.78599200  | -1.54812500 | 0.40718500  |
| C  | 4.40674500  | -2.88821800 | -2.03247400 |
| C  | 5.48967800  | -2.71744900 | 0.10944500  |
| C  | 5.30038900  | -3.38923200 | -1.09288400 |
| H  | 4.26148700  | -3.40123700 | -2.98053700 |
| H  | 6.19759800  | -3.09750600 | 0.84258200  |
| H  | 5.85444600  | -4.30041900 | -1.30018300 |
| C  | 5.00349400  | -0.81202000 | 1.68985900  |
| H  | 4.07139100  | -0.65273100 | 2.24382500  |
| H  | 5.71439700  | -1.34016000 | 2.32960900  |
| H  | 5.39700200  | 0.19680300  | 1.51434700  |
| C  | 2.73627100  | -1.15999300 | -2.80165200 |
| H  | 1.73563200  | -0.96092200 | -2.39504000 |
| H  | 3.08943700  | -0.19611600 | -3.19019200 |
| H  | 2.62839300  | -1.83475800 | -3.65376300 |
| C  | -3.84908300 | -1.58695300 | 2.29046100  |
| H  | -2.78894300 | -1.85599400 | 2.34420200  |
| H  | -3.88914600 | -0.53614000 | 2.59693000  |
| H  | -4.38743000 | -2.18433100 | 3.03048700  |
| C  | -4.31082000 | -0.22580800 | -2.57288200 |
| H  | -3.23091500 | -0.06667600 | -2.66716600 |
| H  | -4.67978700 | -0.64295700 | -3.51250400 |
| H  | -4.77818800 | 0.76117700  | -2.46046900 |
| Ni | 1.23340100  | -0.06429000 | 0.62906700  |
| Ni | -1.04620300 | -0.25797300 | 0.12391300  |

|    |             |             |             |
|----|-------------|-------------|-------------|
| C  | -0.69364600 | -0.33024000 | 2.01665600  |
| C  | -1.28403500 | 0.54144800  | 2.83996400  |
| H  | -1.15773000 | 0.45855400  | 3.92007100  |
| C  | 1.16329300  | -1.79908300 | 1.50784700  |
| H  | 2.16296300  | -2.13838700 | 1.77460400  |
| C  | 0.13742700  | -1.47913300 | 2.55835800  |
| H  | 0.61926400  | -1.16697100 | 3.49004800  |
| H  | -0.49551400 | -2.35729900 | 2.78043500  |
| C  | 0.64007400  | -2.01325000 | 0.21203900  |
| H  | 1.31845000  | -2.31195200 | -0.58971100 |
| C  | -0.79069200 | -2.15251800 | 0.00448700  |
| H  | -1.09911900 | -2.47635500 | -0.98815300 |
| H  | -1.33097600 | -2.66149400 | 0.80859100  |
| Cl | 2.14673000  | 1.02339300  | 2.60030200  |
| Cl | -0.75100100 | -0.07556300 | -2.24273900 |
| H  | -1.87589700 | 1.38884100  | 2.50283300  |

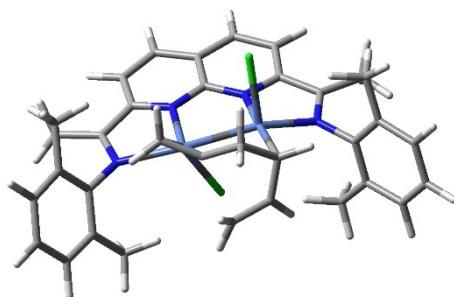

### Structure I

Charge = 0; Multiplicity = 1

Imaginary Frequencies = 1

Electronic Energy = -5472.81209988

Electronic Energy + ZPE = -5472.188673

Free Energy (298 K) = -5472.258402

|   |             |            |             |
|---|-------------|------------|-------------|
| C | -2.48689800 | 3.72756800 | -0.49372700 |
| C | -1.34188200 | 4.49553400 | -0.47812300 |
| C | -0.09002500 | 3.86586000 | -0.33894500 |
| C | -0.08295700 | 2.45233000 | -0.13209000 |
| C | -2.39576700 | 2.33960100 | -0.29938700 |
| H | 1.18600700  | 5.59948700 | -0.56307600 |
| H | -3.45572700 | 4.18469600 | -0.66509500 |
| H | -1.38761400 | 5.57213000 | -0.61589800 |
| C | 1.15879600  | 4.52178100 | -0.42982300 |
| C | 2.24892800  | 2.38470500 | -0.25983000 |
| C | 2.31747000  | 3.78194400 | -0.39701200 |
| H | 3.28557800  | 4.26238900 | -0.49627700 |
| N | 1.06378400  | 1.74736100 | -0.09306300 |

|   |             |             |             |
|---|-------------|-------------|-------------|
| N | -1.22087900 | 1.73030200  | -0.02827600 |
| C | -3.52685900 | 1.43587200  | -0.39459400 |
| C | 3.37278000  | 1.49305000  | -0.32555500 |
| C | -4.89312800 | 2.00392400  | -0.61660800 |
| H | -4.89513900 | 2.62398700  | -1.51892700 |
| H | -5.19952400 | 2.65069300  | 0.21226200  |
| H | -5.64039800 | 1.22044700  | -0.74088100 |
| C | 4.75062800  | 2.01570100  | -0.56128900 |
| H | 5.46537700  | 1.20518400  | -0.70783500 |
| H | 5.08911300  | 2.61648500  | 0.29075800  |
| H | 4.77967500  | 2.66466600  | -1.44241400 |
| N | -3.24180000 | 0.16108800  | -0.34086900 |
| N | 3.06831700  | 0.21596400  | -0.18963900 |
| C | -4.29330700 | -0.78576100 | -0.26768200 |
| C | -5.13656900 | -0.82365900 | 0.86433500  |
| C | -4.40733900 | -1.74526900 | -1.29332400 |
| C | -6.09614100 | -1.83589100 | 0.94302500  |
| C | -5.39321000 | -2.72463000 | -1.17684700 |
| C | -6.23218700 | -2.77711800 | -0.06815600 |
| H | -6.73649500 | -1.87956600 | 1.82114100  |
| H | -5.49410000 | -3.45844700 | -1.97331100 |
| H | -6.98482600 | -3.55638600 | 0.01014300  |
| C | 4.08923500  | -0.76732900 | -0.30933200 |
| C | 4.87779100  | -1.10686300 | 0.80394700  |
| C | 4.23580800  | -1.40848500 | -1.55081500 |
| C | 5.81603600  | -2.12905500 | 0.65166600  |
| C | 5.19049300  | -2.42239300 | -1.65553200 |
| C | 5.97095500  | -2.78693300 | -0.56433500 |
| H | 6.42859800  | -2.40683700 | 1.50641300  |
| H | 5.31507200  | -2.92614600 | -2.61153900 |
| H | 6.70361700  | -3.58308800 | -0.66179800 |
| C | 3.41602800  | -0.97236400 | -2.72494000 |
| H | 3.49781900  | -1.68341000 | -3.55051600 |
| H | 3.74917000  | 0.00425200  | -3.09978700 |
| H | 2.35657800  | -0.84743100 | -2.46828000 |
| C | 4.70045200  | -0.38923900 | 2.10418200  |
| H | 3.65766700  | -0.39928000 | 2.44594000  |
| H | 4.96051700  | 0.67326900  | 2.01952700  |
| H | 5.33083000  | -0.82287200 | 2.88377600  |
| C | -3.51187100 | -1.67800800 | -2.48666400 |
| H | -2.45260700 | -1.66229100 | -2.20545500 |
| H | -3.66667200 | -0.75170300 | -3.05233800 |
| H | -3.68892900 | -2.51878100 | -3.16145900 |
| C | -5.00958400 | 0.16634900  | 1.98340000  |
| H | -3.97945300 | 0.51102800  | 2.11886700  |
| H | -5.34499100 | -0.27297500 | 2.92635200  |

|    |             |             |             |
|----|-------------|-------------|-------------|
| H  | -5.62703900 | 1.05713300  | 1.81383400  |
| Ni | 1.25696000  | -0.09309100 | 0.45003900  |
| Ni | -1.18954500 | -0.22279100 | 0.23078400  |
| C  | -0.73389200 | -1.65403300 | 1.24694500  |
| C  | -1.91847500 | -1.18423700 | 1.79754900  |
| H  | -2.89429300 | -1.55441200 | 1.49328200  |
| C  | 1.12852900  | -2.61993900 | -0.24204600 |
| H  | 1.70856900  | -2.50775800 | -1.15745000 |
| C  | -0.15617800 | -3.14992000 | -0.29240400 |
| H  | -0.65944700 | -3.27425800 | -1.24757300 |
| H  | -0.54034400 | -3.75942600 | 0.52057100  |
| C  | 1.56600100  | -2.01440500 | 0.97352900  |
| H  | 2.60953100  | -2.08417500 | 1.27763900  |
| C  | 0.47033100  | -2.14559100 | 1.98321800  |
| H  | 0.30029500  | -3.18062200 | 2.33209100  |
| Cl | 1.27867500  | 0.81235200  | 2.64685900  |
| Cl | -0.20388900 | -0.39648500 | -1.93350300 |
| H  | 0.62678300  | -1.52419500 | 2.86987600  |
| H  | -1.87208500 | -0.77839200 | 2.81385100  |



## 14. References

1. T. J. Maimone, P. S. Baran, Modern synthetic efforts toward biologically active terpenes. *Nat. Chem. Biol.* **3**, 396 (2007); doi:10.1038/nchembio.2007.1
2. S. E. Gibson, N. Mainolfi, The intermolecular Pauson–Khand reaction. *Angew. Chem., Int. Ed.* **44**, 3022-3037 (2005); doi:10.1002/anie.200462235
3. B. M. Trost, [3+2] Cycloaddition approaches to five-membered rings via trimethylenemethane and its equivalents [New Synthetic Methods (55)]. *Angew. Chem., Int. Ed.* **25**, 1-20 (1986); doi:10.1002/anie.198600013
4. J.-R. Chen, X.-Q. Hu, L.-Q. Lu, W.-J. Xiao, Formal [4+1] annulation reactions in the synthesis of carbocyclic and heterocyclic systems. *Chem. Rev.* **115**, 5301-5365 (2015); doi:10.1021/cr5006974
5. J. Barluenga, S. López, J. Flórez, [3+2] and [4+1] Cycloaddition reactions of Fischer alkoxy(alkenyl)carbene complexes with electronically neutral 1,3-dienes. *Angew. Chem., Int. Ed.* **42**, 231-233 (2003); doi:10.1002/anie.200390087
6. H. Fujimoto, R. Hoffmann, Molecular orbital study of the addition of singlet methylene to butadiene. *J. Phys. Chem.* **78**, 1167-1173 (1974); doi:10.1021/j100605a007
7. W. W. Schoeller, E. Yurtsever, The synchronous 1,4-addition of methylene to cis-butadiene. *J. Am. Chem. Soc.* **100**, 7548-7550 (1978); doi:10.1021/ja00492a018
8. J. D. Evanseck, J. Mareda, K. N. Houk, Theoretical investigation of intramolecular singlet carbene 1,4- and 1,2-cycloadditions. *J. Am. Chem. Soc.* **112**, 73-80 (1990); doi:10.1021/ja00157a012
9. L. A. M. Turkenburg, W. H. de Wolf, F. Bickelhaupt, 1,4-Addition of dichlorocarbene to 1,2-bismethylenecycloheptane. *Tetrahedron Lett.* **23**, 769-770 (1982); doi:10.1016/S0040-4039(00)86944-0
10. H. Sugita, K. Mizuno, T. Mori, K. Isagawa, Y. Otsuji, Unusual mode of addition of 1,2-alkadienylidene carbenes to 1,3-dienes: 1,4 addition to rigid and flexible 1,3-dienes. *Angew. Chem., Int. Ed.* **30**, 984-986 (1991); doi:10.1002/anie.199109841
11. L. Boisvert, F. Beaumier, C. Spino, Evidence for a concerted [4 + 1]-cycloaddition between electron-rich carbenes and electron-deficient dienes. *Org. Lett.* **9**, 5361-5363 (2007); doi:10.1021/ol702172t
12. R. W. Coscia, T. H. Lambert, Development of a formal [4 + 1] cycloaddition: Pd(OAc)<sub>2</sub>-catalyzed intramolecular cyclopropanation of 1,3-dienyl β-keto esters and MgI<sub>2</sub>-promoted vinylcyclopropane–cyclopentene rearrangement. *J. Am. Chem. Soc.* **131**, 2496-2498 (2009); doi:10.1021/ja809226x
13. R. L. Danheiser, C. Martinez-Davila, R. J. Auchus, J. T. Kadonaga, Stereoselective synthesis of cyclopentene derivatives from 1,3-dienes. *J. Am. Chem. Soc.* **103**, 2443-2446 (1981); doi:10.1021/ja00399a067
14. R. L. Danheiser, J. J. Bronson, K. Okano, Carbanion-accelerated vinylcyclopropane rearrangement. Application in a general, stereocontrolled annulation approach to cyclopentene derivatives. *J. Am. Chem. Soc.* **107**, 4579-4581 (1985); doi:10.1021/ja00301a051
15. T. Hudlicky, F. F. Koszyk, T. M. Kutchan, J. P. Sheth, Cyclopentene annulation via intramolecular addition of diazoketones to 1,3-dienes. Applications to the synthesis of cyclopentanoid terpenes. *J. Org. Chem.* **45**, 5020-5027 (1980); doi:10.1021/jo01313a003

16. F. Beaumier, M. Dupuis, C. Spino, C. Y. Legault, Formal intramolecular (4 + 1)-cycloaddition of dialkoxycarbenes: control of the stereoselectivity and a mechanistic portrait. *J. Am. Chem. Soc.* **134**, 5938-5953 (2012); doi:10.1021/ja211927b
17. G. Zuo, J. Louie, Highly active nickel catalysts for the isomerization of unactivated vinyl cyclopropanes to cyclopentenenes. *Angew. Chem., Int. Ed.* **43**, 2277-2279 (2004); doi:10.1002/anie.200353469
18. C. G. Overberger, A. E. Borchert, Novel thermal rearrangements accompanying acetate pyrolysis in small ring systems. *J. Am. Chem. Soc.* **82**, 1007-1008 (1960); doi:10.1021/ja01489a069
19. E. Vogel, Kleine kohlenstoff-ringe. *Angew. Chem.* **72**, 4-26 (1960); doi:10.1002/ange.19600720103
20. M. Murakami, K. Itami, Y. Ito, Rhodium-catalyzed asymmetric [4 + 1] cycloaddition. *J. Am. Chem. Soc.* **119**, 2950-2951 (1997); doi:10.1021/ja964259m
21. B. E. Eaton, B. Rollman, J. A. Kaduk, The first catalytic iron-mediated [4 + 1] cyclopentenone assembly: stereoselective synthesis of 2,5-dialkylidenecyclo-3-pentenones. *J. Am. Chem. Soc.* **114**, 6245-6246 (1992); doi:10.1021/ja00041a052
22. M. S. Sigman, B. E. Eaton, Catalytic iron-mediated [4 + 1] cycloaddition of diallenes with carbon monoxide. *J. Am. Chem. Soc.* **118**, 11783-11788 (1996); doi:10.1021/ja962908o
23. M. Murakami, K. Itami, Y. Ito, A study on rhodium – vinylallene complexes leading to a new reaction, rhodium-catalyzed carbonylative [4 + 1]cycloaddition. *Angew. Chem., Int. Ed.* **34**, 2691-2694 (1996); doi:10.1002/anie.199526911
24. S. Pal, Y.-Y. Zhou, C. Uyeda, Catalytic reductive vinylidene transfer reactions. *J. Am. Chem. Soc.* **139**, 11686-11689 (2017); doi:10.1021/jacs.7b05901
25. M. Iyoda, A. Mizusuna, M. Oda, A novel one-step nickel-mediated synthesis of C<sub>6</sub>Ar<sub>6</sub> conjugated hydrocarbons, highly substituted and overcrowded fulvenes and 3,4-dimethylenecyclobutenes. *Chem. Lett.* **17**, 149-152 (1988); doi:10.1246/cl.1988.149
26. T.-S. Kam, K.-H. Lim, in *The alkaloids: chemistry and biology*, G. A. Cordell, Ed. (Academic Press, 2008), vol. 66, pp. 1-111.
27. H. R. Rounds, M. Zeller, C. Uyeda, Dinuclear pathways for the activation of strained three-membered rings. *Organometallics* **37**, 545-550 (2018); doi:10.1021/acs.organomet.7b00862
28. Y.-Y. Zhou, D. R. Hartline, T. J. Steiman, P. E. Fanwick, C. Uyeda Dinuclear nickel complexes in five states of oxidation using a redox-active ligand. *Inorg. Chem.*, **53**, 11770–11777 (2014); doi: 10.1021/ic5020785
29. Rigaku Corp., The Woodlands, Texas, USA.
30. Z. Otwinowski, W. Minor, Processing of X-ray diffraction data collected in oscillation mode. *Methods Enzymol.* **276**, 307–326 (1997); doi:0.1016/S0076-6879(97)76066-X
31. Bruker (2016). Apex3 v2016.9-0, SAINT V8.34A, SAINT V8.37A, Bruker AXS Inc.: Madison (WI), USA, 2013/2014.
32. SHELXTL suite of programs, Version 6.14, 2000-2003, Bruker Advanced X-ray Solutions, Bruker AXS Inc., Madison, Wisconsin: USA.
33. GM. Sheldrick, A short history of SHELX. *Acta Crystallogr A.* **64**, 112–122 (2008); doi:10.1107/S0108767307043930
34. GM, Sheldrick. University of Göttingen, Germany, 2018.

35. GM, Sheldrick. Crystal structure refinement with SHELXL. *Acta Crystallogr Sect C Struct Chem.* **71**, 3–8 (2015); doi:10.1107/S2053229614024218
36. CB. Hübschle, GM. Sheldrick, B. Dittrich, ShelXle: a Qt graphical user interface for SHELXL. *J. Appl. Crystallogr.* **44**, 1281–1284 (2011); doi: 10.1107/S0021889811043202
37. S. Monfette, Z. R. Turner, S. P. Semproni, P. J. Chirik, Enantiopure C1-symmetric bis(imino)pyridine cobalt complexes for asymmetric alkene hydrogenation. *J. Am. Chem. Soc.* **134**, 4561–4564 (2012); doi:10.1021/ja300503k
38. G. Burton, J. S. Elder, S. C.M Fell, A. V. Stachulski, Acetonitrile: an excellent solvent for the 1,1-dichloromethylenation of certain ketones. *Tetrahedron Lett.* **29**, 3003-3006 (1988); doi:10.1016/0040-4039(88)85072-X25
39. M. Poornachandran, R. Raghunathan. Synthesis of pyrrolo[3,4-*b*]pyrroles and perhydrothiazolo[3',4'-2,3]pyrrolo[4,5-*c*]pyrroles. *Tetrahedron* **64**, 6461–6474 (2008); doi:10.1016/j.tet.2008.04.063
40. T. K. M. Shing, A. W. H. Wong, H. Li, Z. F. Liu, P. K. S. Chan. Conformationally locked bicyclo[4.3.0]nonane carbanucleosides: synthesis and bio-evaluation. *Org. Biomol. Chem.* **12**, 9439-9445 (2014); doi:10.1039/c4ob01763c
41. L. Nagarapu, S. Karnakanti, R. Bantu. Total synthesis of sapinofuranone A from D-ribose. *Tetrahedron* **68**, 5829-5832 (2012); doi: 10.1016/j.tet.2012.05.012
42. S. E. Korkis, D. J. Burns, H. W. Lam. Rhodium-catalyzed oxidative C–H allylation of benzamides with 1,3-dienes by allyl-to-allyl 1,4-Rh(III) migration. *J. Am. Chem. Soc.* **138**, 12252–12257(2016); doi:10.1021/jacs.6b06884
43. L. T. Kliman, S. N. Mlynarski, G. E. Ferris, J.P. Morken. Catalytic enantioselective 1,2-diboration of 1,3-dienes: versatile reagents for stereoselective allylation. *Angew. Chem. Int. Ed.* **51**, 521 –524 (2012); doi:10.1002/anie.201105716
44. S. Simaan, A. Masarwa, E. Zohar, A. Stanger, P. Bertus, I. Marek. Cyclopropenylcarbinol derivatives as new versatile intermediates in organic synthesis: application to the formation of enantiomerically pure alkylidenecyclopropane derivatives. *Chem. Eur. J.* **15**, 8449 – 8464 (2009); doi:10.1002/chem.200901074
45. G. Cahiez, C. Duplais, J. Buendia. Manganese-catalyzed oxidative cross-coupling of Grignard reagents with oxygen as an oxidant. *Angew. Chem. Int. Ed.* **48**, 6731–6734 (2009); doi:10.1002/anie.200902188
46. Gaussian 09, Revision A.02, M. J. Frisch, G. W. Trucks, H. B. Schlegel, G. E. Scuseria, M. A. Robb, J. R. Cheeseman, G. Scalmani, V. Barone, G. A. Petersson, H. Nakatsuji, X. Li, M. Caricato, A. Marenich, J. Bloino, B. G. Janesko, R. Gomperts, B. Mennucci, H. P. Hratchian, J. V. Ortiz, A. F. Izmaylov, J. L. Sonnenberg, D. Williams-Young, F. Ding, F. Lipparini, F. Egidi, J. Goings, B. Peng, A. Petrone, T. Henderson, D. Ranasinghe, V. G. Zakrzewski, J. Gao, N. Rega, G. Zheng, W. Liang, M. Hada, M. Ehara, K. Toyota, R. Fukuda, J. Hasegawa, M. Ishida, T. Nakajima, Y. Honda, O. Kitao, H. Nakai, T. Vreven, K. Throssell, J. A. Montgomery, Jr., J. E. Peralta, F. Ogliaro, M. Bearpark, J. J. Heyd, E. Brothers, K. N. Kudin, V. N. Staroverov, T. Keith, R. Kobayashi, J. Normand, K. Raghavachari, A. Rendell, J. C. Burant, S. S. Iyengar, J. Tomasi, M. Cossi, J. M. Millam, M. Klene, C. Adamo, R. Cammi, J. W. Ochterski, R. L. Martin, K. Morokuma, O. Farkas, J. B. Foresman, and D. J. Fox, Gaussian, Inc., Wallingford CT, 2016.
47. Y. Zhao, D. G. Truhlar. The M06 suite of density functionals for main group thermochemistry, thermochemical kinetics, noncovalent interactions, excited states, and

transition elements: two new functionals and systematic testing of four M06-class functionals and 12 other functionals. *Theor. Chem. Account* **120**, 215–241 (2008); doi: 10.1007/s00214-007-0310-x
